# Supplementary material for: Sex-dependent noradrenergic modulation of premotor cortex during decision-making
Source: eLife. 2023 Aug 22;12:e85590. doi: 10.7554/eLife.85590 (PMC10471161; doi:10.7554/eLife.85590)
Supplement: Figure 1—source data 1. [file elife-85590-fig1-data1.xlsx]

## Sheet: RawData
	Trials Initiated		Fig 1B		% Premature		Fig 1C		% Correct		Fig 1D		% Omissions		Fig 1E		ITI leverpresses		Fig 1F
	Sex	Saline	Propranolol		Sex	Saline	Propranolol		Sex	Saline	Propranolol		Sex	Saline	Propranolol		Sex	Saline	Propranolol	% change from saline
	Female	198	84		Female	22.73	15.48		Female	91.4141	77.3809		Female	0	9.52		Female	0.71719	0.717489	100.042
	Female	189	59		Female	18.52	3.39		Female	84.96	53.5714		Female	4.23	30.51		Female	0.578035	0.556818	96.3295
	Female	173	90		Female	7.51	8.89		Female	89.38	78.48		Female	4.05	11.11		Female	0.37551	0.571429	152.174
	Female	133	51		Female	9.77	19.61		Female	80.4511	74.5098		Female	6.77	13.73		Female	0.369318	0.595238	161.172
	Female	98	66		Female	12.24	4.55		Female	83.95	42.62		Female	14.29	45.45		Female	0.357143	0.528571	148
	Female	93	41		Female	20.43	4.88		Female	87.83	51.2195		Female	3.23	34.15		Female	0.393162	0.444444	113.043
	Female	124	21		Female	21.77	66.7		Female	72.63	0		Female	19.35	33.3		Female	0.47482	1	210.606
	Female	163	33		Female	10.43	18.18		Female	89.58	37.04		Female	8.59	51.52		Female	0.62069	0.722222	116.358
	Female	123	53		Female	17.89	35.85		Female	82	77.3585		Female	15.45	22.64		Female	0.397059
	Female	146	31		Female	15.75	25.81		Female	93.8356	47.83		Female	1.37	38.71		Female	0.591216	0.725	122.629
	Male	104	83		Male	11.54	14.46		Male	87.91	76.81		Male	2.88	3.61		Male	0.476471	0.613636	128.788
	Male	124	142		Male	24.19	22.54		Male	88.17	88.99		Male	0.81	3.52		Male	0.449704	0.594595	132.219
	Male	97	125		Male	11.34	13.6		Male	85.567	94.4		Male	9.28	0.8		Male	0.384	0.542735	141.337
	Male	164	101		Male	24.39	10.89		Male	85.3658	78.2178		Male	3.05	11.88		Male	0.545802	0.5125	93.8986
	Male	149	64		Male	18.12	9.38		Male	87.5	72.41		Male	3.36	9.38		Male	0.357143	0.518519	145.185
	Male	115	71		Male	11.3	16.9		Male	93.5	70.4225		Male	4.35	7.04		Male	0.291971	0.480769	164.663
	Male	99	54		Male	26.26	11.11		Male	91.67	85.42		Male	3.03	3.7		Male	0.548387	0.530612	96.7587
	Male	169	54		Male	13.02	9.26		Male	91.1243	85.42		Male	2.96	7.41		Male	0.405858	0.545455	134.396
	Male	134	34		Male	12.69	11.76		Male	87.83	73.33		Male	7.46	11.76		Male	0.207407	0.409091	197.241
	Decision Time		Fig 1G		Reaction Time		Fig 1H
		Saline	Propranolol			Saline	Propranolol
	Female	0.4085	1.536		Female	0.9715	2.73005
	Female	0.6133	0.612		Female	1.13101	1.34402
	Female	0.850013	1.60051		Female	1.62003	2.71303
	Female	0.749	0.7065		Female	1.594	1.4475
	Female	0.6237	1.38531		Female	1.89102
	Female	0.578025	0.993		Female	2.17105	3.02202
	Female	1.04353	0.535		Female	2.085	2.5145
	Female	0.3635	1.5815		Female	0.934525	3.66405
	Male	0.431	0.845		Male	0.960025	1.36651
	Male	0.438	0.429		Male	0.833012	0.901
	Male	0.493	0.7065		Male	1.24453	1.32101
	Male	0.5505	0.645737		Male	1.25202	1.64151
	Male	0.409	0.616875		Male	1.234	1.62702
	Male	0.4035	0.896562		Male	1.33102	2.01851

## Sheet: Statistics
	Fig 1B
	Two-way RM ANOVA
	Source of Variation	% of total variation	P value	P value summary	Significant?
	Sex x Treatment	5.34	0.0359	*	Yes
	Sex	0.4254	0.5653	ns	No
	Treatment	53.78	<0.0001	****	Yes
	Subject	21.03	0.3537	ns	No
	ANOVA table	SS	DF	MS	F (DFn, DFd)	P value
	Sex x Treatment	4514	1	4514	F (1, 17) = 5.194	P=0.0359
	Sex	359.6	1	359.6	F (1, 17) = 0.3439	P=0.5653
	Treatment	45461	1	45461	F (1, 17) = 52.31	P<0.0001
	Subject	17775	17	1046	F (17, 17) = 1.203	P=0.3537
	Residual	14775	17	869.1
	Šídák's multiple comparisons test	Predicted (LS) mean diff.	95.00% CI of diff.	Below threshold?	Summary	Adjusted P Value
	Saline - Propranolol
	Female	91.1	58.78 to 123.4	Yes	****	<0.0001
	Male	47.44	13.37 to 81.52	Yes	**	0.0066
	Fig 1C
	Two-way RM ANOVA
	Source of Variation	% of total variation	P value	P value summary	Significant?
	Sex x Treatment	3.76	0.2191	ns	No
	Sex	1.797	0.4666	ns	No
	Treatment	0.05134	0.8832	ns	No
	Subject	55.08	0.2461	ns	No
	ANOVA table	SS	DF	MS	F (DFn, DFd)	P value
	Sex x Treatment	162.8	1	162.8	F (1, 17) = 1.628	P=0.2191
	Sex	77.83	1	77.83	F (1, 17) = 0.5547	P=0.4666
	Treatment	2.223	1	2.223	F (1, 17) = 0.02224	P=0.8832
	Subject	2385	17	140.3	F (17, 17) = 1.403	P=0.2461
	Residual	1700	17	99.99
	Šídák's multiple comparisons test	Predicted (LS) mean diff.	95.00% CI of diff.	Below threshold?	Summary	Adjusted P Value
	Saline - Propranolol
	Female	-4.63	-15.59 to 6.334	No	ns	0.5308
	Male	3.661	-7.896 to 15.22	No	ns	0.6953
	Fig 1D
	Two-way RM ANOVA
	Source of Variation	% of total variation	P value	P value summary	Significant?
	Sex x Treatment	9.426	0.01	**	Yes
	Sex	15.13	0.0072	**	Yes
	Treatment	27.03	0.0001	***	Yes
	Subject	27.58	0.2267	ns	No
	ANOVA table	SS	DF	MS	F (DFn, DFd)	P value
	Sex x Treatment	1304	1	1304	F (1, 17) = 8.413	P=0.0100
	Sex	2094	1	2094	F (1, 17) = 9.329	P=0.0072
	Treatment	3740	1	3740	F (1, 17) = 24.12	P=0.0001
	Subject	3816	17	224.5	F (17, 17) = 1.448	P=0.2267
	Residual	2635	17	155
	Šídák's multiple comparisons test	Predicted (LS) mean diff.	95.00% CI of diff.	Below threshold?	Summary	Adjusted P Value
	Saline - Propranolol
	Female	31.6	17.95 to 45.25	Yes	****	<0.0001
	Male	8.135	-6.256 to 22.53	No	ns	0.3336
	Fig 1E
	Two-way RM ANOVA
	Source of Variation	% of total variation	P value	P value summary	Significant?
	Sex x Treatment	13.27	0.0012	**	Yes
	Sex	25.32	0.0005	***	Yes
	Treatment	21	0.0001	***	Yes
	Subject	23.43	0.1877	ns	No
	ANOVA table	SS	DF	MS	F (DFn, DFd)	P value
	Sex x Treatment	845.6	1	845.6	F (1, 17) = 14.92	P=0.0012
	Sex	1613	1	1613	F (1, 17) = 18.37	P=0.0005
	Treatment	1338	1	1338	F (1, 17) = 23.61	P=0.0001
	Subject	1493	17	87.81	F (17, 17) = 1.550	P=0.1877
	Residual	963.3	17	56.66
	Šídák's multiple comparisons test	Predicted (LS) mean diff.	95.00% CI of diff.	Below threshold?	Summary	Adjusted P Value
	Saline - Propranolol
	Female	-21.33	-29.58 to -13.08	Yes	****	<0.0001
	Male	-2.436	-11.14 to 6.265	No	ns	0.7517
	Fig 1F
	Mixed-effects model (REML)
	Fixed effects (type III)	P value	P value summary	Statistically significant (P < 0.05)?	F (DFn, DFd)
	Sex	0.053	ns	No	F (1, 17) = 4.324
	Treatment	0.0003	***	Yes	F (1, 16) = 21.18
	Sex x Treatment	0.5266	ns	No	F (1, 16) = 0.4190
	Šídák's multiple comparisons test	Predicted (LS) mean diff.	95.00% CI of diff.	Below threshold?	Summary	Adjusted P Value
	Saline - PA10
	Female	-0.1595	-0.2647 to -0.05425	Yes	**	0.0036
	Male	-0.1201	-0.2269 to -0.01341	Yes	*	0.0268
	Fig 1G
	Mixed-effects model (REML)
	Fixed effects (type III)	P value	P value summary	Statistically significant (P < 0.05)?	F (DFn, DFd)
	Sex	0.0086	**	Yes	F (1, 24) = 8.180
	Treatment	0.0039	**	Yes	F (1, 24) = 10.18
	Sex x Treatment	0.3071	ns	No	F (1, 24) = 1.089
	Šídák's multiple comparisons test	Predicted (LS) mean diff.	95.00% CI of diff.	Below threshold?	Summary	Adjusted P Value
	Saline - Propranolol
	Female	-0.465	-0.8080 to -0.1220	Yes	**	0.0071
	Male	-0.2358	-0.6319 to 0.1603	No	ns	0.3086
	Fig 1H
	Mixed-effects model (REML)
	Fixed effects (type III)	P value	P value summary	Statistically significant (P < 0.05)?	F (DFn, DFd)
	Sex	0.0067	**	Yes	F (1, 12) = 10.69
	Treatment	0.009	**	Yes	F (1, 11) = 10.01
	Sex x Treatment	0.1617	ns	No	F (1, 11) = 2.251
	Šídák's multiple comparisons test	Predicted (LS) mean diff.	95.00% CI of diff.	Below threshold?	Summary	Adjusted P Value
	Saline - Propranolol
	Female	-0.9445	-1.645 to -0.2444	Yes	*	0.0101
	Male	-0.3368	-1.116 to 0.4423	No	ns	0.4922
