# Supplementary material for: Sex-dependent noradrenergic modulation of premotor cortex during decision-making
Source: eLife. 2023 Aug 22;12:e85590. doi: 10.7554/eLife.85590 (PMC10471161; doi:10.7554/eLife.85590)
Supplement: Figure 2—source data 1. [file elife-85590-fig2-data1.xlsx]

## Sheet: RawData
	Fig 2C, 2D & 2E		Mean Firing Rate (Hz)				Fig 2F	Saline Female
	Saline		Propranolol					Cue	Lever press
	Female	Male	Female	Male			Left	39	42
	4.92187	1.11197	9.77628	8.93351			Right	29	26
	3.83693	12.8664	5.3032	12.9586
	3.96763	4.53203	1.17049	5.9837
	7.19116	1.75166	4.57792	10.9922			Fig 2G	Saline Male
	2.5198	12.7217	4.63163	0.772921				Cue	Lever press
	3.26743	1.72828	5.50497	3.31262			Left	33	40
	3.13894	6.30328	1.95317	11.1233			Right	38	31
	3.05826	1.29171	3.87032	1.78791
	4.93488	0.702653	6.87599	0.309428
	10.2837	0.249072	3.23077	0.380866			Fig 2H	Propranolol Female
	11.334	7.63489	3.60179	2.20625				Cue	Lever press
	11.4764	7.28966	2.37073	0.744271			Left	17	8
	6.95356	4.58358	5.57593	3.43153			Right	10	18
	4.5674	3.79116	3.15191	5.47112
	5.17396	6.4909	11.6316	15.1598
	3.1652	2.12234	3.88263	4.80669			Fig 2I	Propranolol Male
	6.67708	3.23655	3.13992	9.89216				Cue	Lever press
	3.56288	4.55052	4.37069	1.88522			Left	25	10
	3.62119	3.93922	8.82792	5.77197			Right	23	38
	6.18698	6.32946	9.72613	0.526526
	3.79931	3.60124	5.49635	0.913123
	6.52361	1.5571	1.96684	11.297
	9.41873	1.25724	2.54048	3.28714
	3.38358	4.07638	4.77438	8.82296
	10.8648	1.84292	1.06596	2.80888
	1.50297	2.82503	0.74354	8.24082
	1.0686	3.86965	2.0769	3.00995
	2.53278	13.8503		3.49043
	0.824574	4.2712		18.2653
	0.8	10.8604		1.87015
	0.410145	2.92932		3.34362
	2.23658	10.9492		2.65935
	2.87368	1.67656		1.45026
	2.95366	6.00337		3.70469
	5.22773	5.4391		3.06718
	4.22069	2.40438		1.36231
	1.87142	7.07887		1.20735
	3.46396	3.34313		0.548542
	1.87545	8.79142		9.36878
	4.12785	1.59294		3.67514
	2.48895	1.96365		4.53866
	0.625408	1.34753		4.58025
	1.92322	14.7433		7.57496
	0.545092	11.148		11.5949
	3.25521	5.31672		13.1503
	7.8262	8.82927		8.56007
	0.80117	2.83622		8.99964
	4.78493	5.13972		0.32199
	1.80146	4.55956
	0.738191	5.93706
	1.31981	3.4058
	1.69031	1.93695
	2.72841	1.28126
	1.98967	1.71358
	1.15725	7.43211
	2.27565	10.3807
	2.23994	5.08062
	1.56158	9.45599
	0.88774	16.8431
	0.817375	5.25743
	1.44535	6.29218
	0.61232	3.09724
	0.745018	5.79455
	2.24177	15.0968
	2.80155	14.1152
	1.06778	2.31235
	0.251393	3.54156
	1.29268	1.56834
	1.95918	0.601279
	4.62051	3.59138
		0.342199

## Sheet: Statistics
	Fig 2C
	Two-way ANOVA
	Source of Variation	% of total variation	P value	P value summary	Significant?
	Interaction	0.37	0.3637	ns	No
	Sex	2.852	0.0122	*	Yes
	Treatment	0.5999	0.2477	ns	No
	ANOVA table	SS (Type III)	DF	MS	F (DFn, DFd)	P value
	Interaction	11.02	1	11.02	F (1, 212) = 0.8286	P=0.3637
	Sex	84.94	1	84.94	F (1, 212) = 6.387	P=0.0122
	Treatment	17.87	1	17.87	F (1, 212) = 1.343	P=0.2477
	Residual	2819	212	13.3
	Šídák's multiple comparisons test	Predicted (LS) mean diff.	95.00% CI of diff.	Below threshold?	Summary	Adjusted P Value
	Female - Male
	Saline	-1.841	-3.224 to -0.4572	Yes	**	0.0061
	Propranolol	-0.8659	-2.842 to 1.110	No	ns	0.544
	Fig 2E			Fig 2F
	Mann Whitney test			Mann Whitney test
	P value	0.0271		P value	0.8228
	Exact or approximate P value?	Exact		Exact or approximate P value?	Exact
	P value summary	*		P value summary	ns
	Significantly different (P < 0.05)?	Yes		Significantly different (P < 0.05)?	No
	One- or two-tailed P value?	Two-tailed		One- or two-tailed P value?	Two-tailed
	Sum of ranks in column A,B	3156 , 1597		Sum of ranks in column C,D	4302 , 2838
	Mann-Whitney U	671		Mann-Whitney U	1662
	Fig 2G & 2I			Fig 2H & 2J
	CUE			CUE
	P value and statistical significance			P value and statistical significance
	Test	Fisher's exact test		Test	Fisher's exact test
	P value	0.6513		P value	0.5793
	P value summary	ns		P value summary	ns
	One- or two-sided	Two-sided		One- or two-sided	Two-sided
	Statistically significant (P < 0.05)?	No		Statistically significant (P < 0.05)?	No
	LEVER PRESS			LEVER PRESS
	P value and statistical significance			P value and statistical significance
	Test	Fisher's exact test		Test	Fisher's exact test
	P value	0.0105		P value	0.0001
	P value summary	*		P value summary	***
	One- or two-sided	Two-sided		One- or two-sided	Two-sided
	Statistically significant (P < 0.05)?	Yes		Statistically significant (P < 0.05)?	Yes

## Sheet: SidePreference
			TARGET VS iti - corrected pval					adjusted p values				Sidepreference Index		sidepreference
ID	Treatment	sex	R CUE	L CUE	R LP	L LP	Sidepref y/n?	R CUE	L CUE	R LP	L LP	CUE	LP	CUE	LP
CDH16002_20161017_S_01A	Saline	F	1	1	1	1	X	9.54516e-09	1.22553e-07	1.72218e-06	1.39614e-08	0.00254453	0.132653	L	L
CDH16002_20161017_S_17A	Saline	F	0	0	0	0		0.0325406	0.482313	0.20059	0.0516883	-0.136364	0.19084	R	L
CDH16002_20161017_S_19A	Saline	F	0	0	0	0		0.517066	0.202496	0.852802	0.236071	0.0135501	0.227139	L	L
CDH16003_20161018_S_17A	Saline	F	1	0	0	1	X	5.75684e-06	0.904772	0.603492	0.00596839	-0.208609	-0.215496	R	R
CDH16005_20161021_S_05A	Saline	M	1	1	1	1	X	3.5649e-08	1.64447e-10	1.71031e-05	1.67495e-13	0.047619	0.24878	L	L
CDH16005_20161021_S_07A	Saline	M	0	0	0	0		0.976128	0.223481	0.848032	0.63622	0.0708661	0.13913	L	L
CDH16005_20161021_S_07B	Saline	M	1	0	1	1	X	0.00083519	0.0168978	2.32646e-07	0.0103839	0.188661	0.371188	L	L
CDH16005_20161021_S_07C	Saline	M	0	1	0	0	X	0.10406	0.00197494	0.581659	0.0670889	-0.0895884	0.033557	R	L
CDH16005_20161021_S_07D	Saline	M	0	0	0	0		0.135328	0.409956	0.0257476	0.796396	0.0356164	0.235127	L	L
CDH16005_20161021_S_09A	Saline	M	0	0	0	0		0.275126	0.370172	0.572494	0.262961	-0.140271	-0.0248756	R	R
CDH16005_20161021_S_09B	Saline	M	0	0	0	0		0.41758	0.25505	0.104682	0.91932	-0.206107	-0.0675676	R	R
CDH16005_20161021_S_09C	Saline	M	0	1	0	1	X	0.0362423	0.00191996	0.203626	0.00520542	-0.22314	-0.176471	R	R
CDH16005_20161021_S_09D	Saline	M	0	0	0	0		0.10371	0.289912	0.0539729	0.246052	0.148936	0.4	L	L
CDH16005_20161021_S_09E	Saline	M	0	0	0	0		1	0.167166	0.306757	0.0706928	0.148148	0.42	L	L
CDH16005_20161021_S_13A	Saline	M	0	0	0	0		0.262701	0.596393	0.961907	0.969764	-0.0342298	0.0914052	R	L
CDH16005_20161021_S_15A	Saline	M	0	0	0	1	X	0.99738	0.412911	0.0507202	0.00911532	0.0159744	0.107011	L	L
CDH16005_20161021_S_15B	Saline	M	0	1	0	1	X	0.251446	0.000463171	0.528516	0.0014453	0.187215	0.427027	L	L
CDH16005_20161021_S_15C	Saline	M	1	0	1	0	X	0.00971435	0.208233	0.00036088	0.260823	-0.196694	-0.1354	R	R
CDH16005_20161021_S_17A	Saline	M	1	0	0	0	X	0.00816407	0.333895	0.302332	0.0432962	-0.163934	0.178571	R	L
CDH16005_20161021_S_17B	Saline	M	0	0	0	0		0.484974	0.295891	0.982296	0.085444	-0.0634921	-0.114754	R	R
CDH16005_20161021_S_17C	Saline	M	0	1	0	1	X	0.911706	6.29311e-07	0.677332	1.66689e-08	0.553398	0.722222	L	L
CDH16005_20161021_S_17D	Saline	M	0	0	0	0		0.705459	0.0539407	0.868863	0.0265856	-0.236364	-0.192308	R	R
CDH16005_20161021_S_17E	Saline	M	0	0	0	0		0.673646	0.39891	0.259205	0.180131	0.0277778	0.111111	L	L
CDH16005_20161021_S_17F	Saline	M	1	0	0	0	X	0.0102252	0.947244	0.313784	0.383935	-0.4	0.04	R	L
CDH16005_20161021_S_21A	Saline	M	0	1	0	1	X	0.668864	0.00277616	0.184048	0.00887612	-0.114525	-0.0563003	R	R
CDH16005_20161021_S_21B	Saline	M	1	1	0	1	X	0.00868004	0.00487387	0.0295738	0.00161384	-0.00219298	0.119454	R	L
CDH16005_20161021_S_21C	Saline	M	0	0	0	0		0.747779	0.752404	0.470841	0.535956	-0.00900901	0.461538	R	L
CDH16005_20161021_S_21D	Saline	M	0	0	0	0		0.687169	0.515148	0.878745	0.507351	0.0107527	0.129944	L	L
CDH16005_20161021_S_25A	Saline	M	1	0	0	0	X	0.00808577	0.0977607	0.0217174	0.0309602	-0.102564	0.0614525	R	L
CDH16005_20161021_S_25B	Saline	M	0	0	0	0		0.940746	0.372211	0.246806	0.473089	0.0482315	0.2237	L	L
CDH16005_20161021_S_25C	Saline	M	0	0	0	0		0.428989	0.0424696	0.841596	0.0382231	0.149727	0.213434	L	L
CDH16005_20161021_S_25D	Saline	M	0	0	0	0		0.0323824	0.0281431	0.0213937	0.0675232	-0.0225564	0.193955	R	L
CDH16005_20161021_S_25E	Saline	M	0	0	0	0		0.198523	0.36026	0.0366041	0.0629743	-0.031941	0.0769231	R	L
CDH16005_20161021_S_31A	Saline	M	0	1	1	1	X	0.0142036	0.000533643	0.00397211	8.26132e-07	0.0484581	0.177914	L	L
CDH16008_20161019_S_09A	Saline	M	0	0	0	0		0.648706	0.975728	0.180001	0.8131	0.0316742	0	L
CDH16008_20161019_S_23A	Saline	M	0	0	0	0		0.0526877	0.675641	0.685549	0.601211	-0.155039	0.0956522	R	L
CDH16010_20161025_S_01A	Saline	F	0	0	1	0	X	0.0330155	0.705053	0.000532992	0.533205	-0.0730337	-0.218659	R	R
CDH16010_20161025_S_01B	Saline	F	0	0	0	0		0.0408669	0.860982	0.263199	0.696816	-0.272727	-0.170732	R	R
CDH16010_20161025_S_05A	Saline	F	0	0	0	1	X	0.061468	0.0418076	0.0494335	0.00179839	0.00966184	-0.185185	L	R
CDH16010_20161025_S_05B	Saline	F	0	0	0	1	X	0.0321452	0.510776	0.0612359	0.00314586	-0.0841121	-0.475862	R	R
CDH16010_20161025_S_07A	Saline	F	0	0	0	0		0.0578178	0.804782	0.0195144	0.375415	0.26	0.191176	L	L
CDH16010_20161025_S_07B	Saline	F	1	0	1	1	X	1.82181e-13	0.629975	1.1205e-26	1.56895e-05	-0.431034	-0.434483	R	R
CDH16010_20161025_S_11A	Saline	F	1	0	0	0	X	0.00107497	0.70609	0.0281929	0.0366109	-0.163522	-0.0878378	R	R
CDH16010_20161025_S_13A	Saline	F	0	0	0	0		0.771572	0.0946032	0.351505	0.715495	-0.139073	-0.119497	R	R
CDH16010_20161025_S_15A	Saline	F	1	1	1	1	X	2.87566e-06	6.1498e-06	1.4214e-08	8.10169e-07	0.0535714	0.0833333	L	L
CDH16010_20161025_S_17A	Saline	F	0	0	0	0		0.524515	0.134218	0.229476	0.24082	-0.146919	-0.0775862	R	R
CDH16010_20161025_S_17B	Saline	F	0	0	0	1	X	0.133114	0.0180344	0.0209543	0.012307	0.0680628	-0.0914127	L	R
CDH16010_20161025_S_21A	Saline	F	0	1	0	0	X	0.536258	0.0115346	0.384533	0.0599843	-0.0799439	-0.205839	R	R
CDH16010_20161025_S_21B	Saline	F	1	1	1	1	X	1.80972e-06	3.38896e-06	2.80194e-07	3.21623e-15	0.0112923	-0.288014	L	R
CDH16010_20161025_S_23A	Saline	F	0	1	0	0	X	0.69349	2.40662e-06	0.519175	0.263893	0.126511	-0.134783	L	R
CDH16010_20161025_S_23B	Saline	F	1	1	1	1	X	2.96704e-16	7.92491e-30	0.000206834	1.24415e-06	0.146953	-0.0397554	L	R
CDH16010_20161025_S_23C	Saline	F	0	0	0	0		0.0309939	0.929836	0.83742	0.561445	0.113372	-0.101587	L	R
CDH16010_20161025_S_23D	Saline	F	0	1	0	1	X	0.0149039	3.27321e-10	0.020259	4.31951e-11	0.220126	0.129353	L	L
CDH16010_20161025_S_25A	Saline	F	1	1	1	1	X	7.26391e-05	0.00447191	8.01763e-05	3.09687e-07	0.145374	-0.287671	L	R
CDH16010_20161025_S_25B	Saline	F	0	1	1	1	X	0.0715547	5.05755e-17	0.000948054	8.34249e-34	0.714286	0.826087	L	L
CDH16010_20161025_S_25C	Saline	F	1	1	1	1	X	2.19591e-09	6.43872e-06	9.21706e-09	1.35854e-05	0.103774	-0.0138504	L	R
CDH16010_20161025_S_25D	Saline	F	0	1	1	0	X	0.189497	0.00435562	0.000151205	0.896378	-0.283951	0.84	R	L
CDH16010_20161025_S_25E	Saline	F	0	0	0	0		0.22391	0.0270616	0.0630921	0.363217	-0.235294	-0.00990099	R	R
CDH16010_20161025_S_27A	Saline	F	1	1	0	0	X	1.14267e-05	0.00019067	0.864832	0.84137	-0.0172084	-0.108108	R	R
CDH16010_20161025_S_27B	Saline	F	1	1	0	1	X	4.74154e-07	1.16827e-11	0.0428892	3.63989e-05	0.0810811	0.00878735	L	L
CDH16010_20161025_S_27C	Saline	F	0	0	1	0	X	0.335129	0.689285	5.35416e-05	0.524522	-0.0734824	-0.337349	R	R
CDH16010_20161025_S_27D	Saline	F	0	0	0	0		0.392693	0.0281402	0.208516	0.0761098	0.2	-0.234043	L	R
CDH16010_20161025_S_27E	Saline	F	1	1	1	1	X	4.89267e-06	0.00161324	3.34629e-15	6.61092e-13	-0.0480349	-0.118727	R	R
CDH16010_20161025_S_29A	Saline	F	0	0	0	0		0.774049	0.0503126	0.0212928	0.236558	-0.0752688	-0.0293333	R	R
CDH16010_20161025_S_29B	Saline	F	0	1	1	0	X	0.16663	5.12816e-07	0.00204882	0.869867	0.243056	0.0412926	L	L
CDH16011_20161027_S_09A	Saline	F	0	1	0	0	X	0.661149	1.06906e-05	0.558939	0.27526	0.238095	0.291339	L	L
CDH16011_20161027_S_15A	Saline	F	0	1	0	1	X	0.0230705	3.72228e-08	0.0425748	8.40831e-07	-0.195266	0.0588235	R	L
CDH16011_20161027_S_29A	Saline	F	0	0	0	1	X	0.28693	0.0690789	0.603502	0.0112951	-0.1	-0.0277778	R	R
CDH16011_20161027_S_31A	Saline	F	0	0	1	1	X	0.528069	0.260286	0.00236772	3.8893e-10	0.217391	0.384615	L	L
CDH169019_20161018_S_01A	Saline	M	1	0	1	0	X	7.83155e-05	0.843084	0.000183852	0.703829	-0.193961	-0.280593	R	R
CDH169019_20161018_S_03A	Saline	M	0	1	0	1	X	0.0525274	5.32161e-07	0.012722	1.15159e-08	-0.456311	-0.679012	R	R
CDH169019_20161018_S_05A	Saline	M	1	1	1	1	X	3.40189e-06	0.00485766	4.47351e-05	0.00660608	0.173709	0.0414747	L	L
CDH169019_20161018_S_09A	Saline	M	1	1	1	1	X	1.78913e-09	1.20197e-10	1.0083e-08	4.66803e-11	-0.0606061	-0.236559	R	R
CDH169019_20161018_S_09B	Saline	M	1	1	1	1	X	1.99063e-10	6.27326e-11	5.81425e-17	8.76465e-14	-0.0114943	0.0275229	R	L
CDH169019_20161018_S_09C	Saline	M	1	1	1	1	X	7.00148e-10	0.000116669	7.99712e-16	2.39138e-10	0.146154	0.0532213	L	L
CDH169019_20161018_S_21A	Saline	M	1	0	1	1	X	3.353e-06	0.0239713	2.22359e-07	0.00877124	-0.129657	-0.179487	R	R
CDH169019_20161018_S_25A	Saline	M	0	1	0	0	X	0.313817	3.03326e-08	0.0942056	0.103689	0.250859	0.173184	L	L
EMR17001_20170705_S_03A	Saline	F	1	1	1	1	X	1.98233e-05	2.72818e-16	1.10127e-09	2.88341e-21	0.235897	0.469169	L	L
EMR17001_20170705_S_07A	Saline	F	1	0	0	0	X	0.0037867	0.0220751	0.898338	0.241071	-0.0634921	0.492537	R	L
EMR17001_20170705_S_07B	Saline	F	0	0	0	0		0.090247	0.572083	0.427928	0.0862599	-0.351351	-0.176471	R	R
EMR17001_20170705_S_09A	Saline	F	1	1	0	0	X	2.69542e-05	9.21567e-07	0.613325	0.896241	0.116667	0.6	L	L
EMR17001_20170705_S_09B	Saline	F	1	0	0	0	X	0.0049155	0.923135	0.474157	0.637544	0.52	0.533333	L	L
EMR17001_20170705_S_11A	Saline	F	0	0	0	0		0.948398	0.0159474	0.0727028	0.0514944	0.28	0.333333	L	L
EMR17001_20170705_S_15A	Saline	F	0	0	0	1	X	0.012673	0.012673	0.0835705	0.0109665
EMR17001_20170705_S_15B	Saline	F	0	0	0	0		0.53375	0.53375	0.666961	0.525319	NaN	NaN
EMR17001_20170705_S_15C	Saline	F	0	1	1	1	X	0.356288	3.46309e-05	1.27537e-40	0.00433378	-0.698413	-0.828148	R	R
EMR17001_20170705_S_17A	Saline	F	1	1	1	1	X	0.000315649	0.00126388	7.26302e-06	0.00025118	-0.0178117	0.272171	R	L
EMR17001_20170705_S_17B	Saline	F	0	0	0	0		0.104263	0.411184	0.0949486	0.425607	0.235294	0.8	L	L
EMR17001_20170705_S_21A	Saline	F	1	1	0	1	X	0.00798933	0.00458856	0.857154	0.00180174	0.00408163	0.446097	L	L
EMR17001_20170705_S_21B	Saline	F	0	0	0	0		0.594905	0.850975	0.534	0.561391	0.08	0.432836	L	L
EMR17001_20170705_S_23A	Saline	F	0	0	1	0	X	0.778313	0.1268	8.80617e-05	0.325677	-0.140893	-0.115727	R	R
EMR17001_20170705_S_23B	Saline	F	0	0	1	0	X	0.802822	0.0919718	0.000255821	0.0131352	0.139535	0.247191	L	L
EMR17001_20170705_S_23C	Saline	F	0	0	1	0	X	0.583812	0.251289	2.75018e-05	0.0963757	-0.196891	-0.257294	R	R
EMR17001_20170705_S_25A	Saline	F	0	0	0	0		0.802683	0.480973	0.625996	0.471946	-1	NaN	R
EMR17001_20170705_S_25B	Saline	F	0	0	1	0	X	0.290073	0.637438	4.94601e-05	0.913063	-0.104762	-0.158416	R	R
EMR17001_20170705_S_25C	Saline	F	0	0	1	0	X	0.536584	0.184728	5.03776e-05	0.0356207	0.0288066	0.554656	L	L
EMR17001_20170705_S_25D	Saline	F	0	1	0	1	X	0.653753	0.00257627	0.529308	2.67363e-05	0.164474	0.486989	L	L
EMR17001_20170705_S_25E	Saline	F	0	0	0	0		0.0619493	0.284848	0.120098	0.527554	0.26087	0.574074	L	L
EMR17001_20170705_S_27A	Saline	F	NaN	NaN	NaN	NaN		NaN	NaN	NaN	NaN	NaN	NaN
EMR17001_20170705_S_27B	Saline	F	0	0	0	0		0.050391	0.782006	0.596092	0.58813	1	0.333333	L	L
EMR17001_20170705_S_27C	Saline	F	1	1	1	1	X	4.34256e-05	2.61394e-10	3.84546e-05	3.54632e-11	0.145161	0.5	L	L
EMR17001_20170705_S_27D	Saline	F	0	0	0	0		0.838986	0.377146	0.54128	0.367362	-1	NaN	R
EMR17001_20170705_S_29A	Saline	F	0	1	1	1	X	0.664398	3.04222e-06	7.79629e-08	1.45713e-08	0.246154	0.328671	L	L
EMR17001_20170705_S_31A	Saline	F	0	1	1	1	X	0.713107	0.000653117	5.61582e-05	1.15733e-06	0.353846	0.349398	L	L
EMR17002_20170824_S_01A	Saline	F	1	1	1	1	X	1.12474e-17	2.86382e-24	4.64429e-06	6.6147e-22	0.0737387	0.251724	L	L
EMR17002_20170824_S_05A	Saline	F	1	1	0	1	X	1.05872e-16	1.0676e-43	0.0144561	5.55082e-24	-0.677704	-0.464956	R	R
EMR17002_20170824_S_07A	Saline	F	1	0	0	0	X	3.78092e-16	0.0338708	0.271478	0.201255	-0.460177	0.0212766	R	L
EMR17002_20170824_S_09A	Saline	F	1	1	1	1	X	2.12476e-28	2.08684e-26	9.67085e-28	2.52945e-22	0.178947	0.59116	L	L
EMR17002_20170824_S_09B	Saline	F	0	1	0	0	X	0.805505	0.000345406	0.250006	0.0133599	-0.461988	-0.340541	R	R
EMR17002_20170824_S_11A	Saline	F	1	1	1	0	X	0.000190157	0.00818937	0.00693456	0.018516	0.384615	0.16129	L	L
EMR17002_20170824_S_11B	Saline	F	0	0	0	0		0.289729	0.0310024	0.688047	0.0928353	0.108434	0.164179	L	L
EMR17002_20170824_S_23A	Saline	F	0	0	0	0		0.699573	0.0483875	0.212167	0.611452	0.234783	0.147059	L	L
EMR17002_20170824_S_23B	Saline	F	1	1	0	0	X	0.0047349	6.72674e-07	0.297888	0.516761	0.188612	0.151515	L	L
EMR17002_20170824_S_27A	Saline	F	0	0	0	0		0.0142759	0.0126797	0.0913036	0.0190588	-1	-0.857143	R	R
EMR17002_20170824_S_31A	Saline	F	0	1	0	1	X	0.0208081	1.49689e-07	0.0153503	3.91312e-07	0.201613	0.225225	L	L
EMR17003_20170612_S_05A	Saline	F	0	0	0	0		0.8434	0.465845	0.359582	0.461366	-0.428571	-0.647059	R	R
EMR17003_20170612_S_09A	Saline	F	1	1	1	1	X	2.68767e-07	2.31436e-07	5.80295e-07	2.34002e-05	-0.00952381	0.241379	R	L
EMR17003_20170612_S_09B	Saline	F	0	0	1	1	X	0.313826	0.224809	0.004533	6.93101e-05	-0.0196078	-0.333333	R	R
EMR17003_20170612_S_11A	Saline	F	0	0	0	0		0.517649	0.359686	0.153873	0.628947	0.025641	0.15942	L	L
EMR17003_20170612_S_13A	Saline	F	0	1	0	0	X	0.36203	0.000510717	0.644147	0.962425	-0.228916	0.0967742	R	L
EMR17003_20170612_S_17A	Saline	F	0	0	0	1	X	0.619428	0.0380899	0.89722	8.55359e-11	0.0898551	0.321534	L	L
EMR17003_20170612_S_17B	Saline	F	1	1	0	0	X	7.17265e-08	9.65563e-13	0.115578	0.200952	0.0758621	0.0479233	L	L
EMR17003_20170612_S_17C	Saline	F	0	0	1	0	X	0.301546	0.745565	4.38512e-15	0.985764	-0.125926	-0.47	R	R
EMR17003_20170612_S_19A	Saline	F	0	1	0	1	X	0.0432532	0.00033785	0.092745	0.000232011	0.177419	0.216495	L	L
EMR17003_20170612_S_21A	Saline	F	0	1	1	1	X	0.119571	2.014e-07	0.0025131	0.00185978	0.373737	0.0410959	L	L
EMR17003_20170612_S_21B	Saline	F	0	0	1	1	X	0.0497243	0.016985	0.00185956	0.00447754	-0.0769231	0.241379	R	L
EMR17003_20170612_S_23A	Saline	F	0	0	1	1	X	0.404979	0.0235837	0.0119799	0.00596645	-0.333333	0	R
EMR17003_20170612_S_23B	Saline	F	1	1	1	0	X	0.000672515	0.00334779	0.0063959	0.0258785	0.4	0.384615	L	L
EMR17003_20170612_S_25A	Saline	F	0	0	1	1	X	0.777861	0.735583	0.00127707	0.00726353	0.0162162	0.4375	L	L
EMR17003_20170612_S_25B	Saline	F	0	0	0	0		0.793034	0.822789	0.621755	0.858589	0	0.25		L
EMR17003_20170612_S_27A	Saline	F	0	0	0	0		0.921525	0.216669	0.112161	0.9005	-0.3	0.571429	R	L
EMR17003_20170612_S_29A	Saline	F	1	1	1	1	X	1.272e-10	3.8928e-15	3.57618e-61	2.73085e-62	0.152074	0.0451866	L	L
EMR17004_20170807_S_03A	Saline	F	0	0	0	0		0.287305	0.0425184	0.0269146	0.0169652	0.0994152	0.042654	L	L
EMR17004_20170807_S_03B	Saline	F	1	1	1	1	X	1.16889e-09	3.35283e-08	1.51657e-11	2.3413e-11	-0.039604	0.017094	R	L
EMR17004_20170807_S_07A	Saline	F	1	1	1	1	X	0.00146825	0.000695052	0.00601276	0.00278774	0	0.0810811		L
EMR17004_20170807_S_09A	Saline	F	1	0	1	0	X	0.000116077	0.217265	7.00878e-05	0.612829	-0.223684	-0.22973	R	R
EMR17004_20170807_S_11A	Saline	F	1	1	1	1	X	3.35567e-05	0.00290889	0.000520494	0.00220788	0.116667	0.0869565	L	L
EMR17004_20170807_S_17A	Saline	F	1	1	1	1	X	0.000465429	2.20956e-07	3.38558e-05	2.16201e-09	0.0555556	0.0957983	L	L
EMR17006_20170615_S_01A	Saline	M	1	1	1	1	X	2.04041e-06	5.44232e-06	4.65406e-05	0.0109818	-0.0119048	-0.149254	R	R
EMR17006_20170615_S_03A	Saline	M	0	0	0	0		0.0246146	0.0166794	0.026407	0.072289	0.011236	0	L
EMR17006_20170615_S_05A	Saline	M	1	1	1	1	X	1.97396e-05	8.72746e-06	1.50898e-05	3.92198e-05	-1	0.2	R	L
EMR17006_20170615_S_07A	Saline	M	0	0	0	0		0.692624	0.938109	0.284382	0.238403	0.166667	0.538462	L	L
EMR17006_20170615_S_09A	Saline	M	1	0	1	1	X	1.41613e-14	0.0630019	7.22569e-20	2.02438e-07	-0.364035	-0.25188	R	R
EMR17006_20170615_S_09B	Saline	M	0	0	0	0		0.215808	0.0227424	0.895889	0.193488	-0.5	-0.244444	R	R
EMR17006_20170615_S_11A	Saline	M	0	0	0	0		0.0429476	0.165585	0.0371201	0.091782	0.268293	0.0909091	L	L
EMR17006_20170615_S_11B	Saline	M	1	0	1	1	X	0.000499139	0.377249	0.00211725	0.000176292	-0.120603	-0.535211	R	R
EMR17006_20170615_S_11C	Saline	M	0	0	0	0		0.811488	0.524338	0.242665	0.144393	0.111111	-0.714286	L	R
EMR17006_20170615_S_11D	Saline	M	0	0	0	0		0.554104	0.54295	0.548474	0.565695	NaN	NaN
EMR17006_20170615_S_13A	Saline	M	0	0	0	1	X	0.125978	0.46919	0.0728449	0.000302867	0.206154	0.328042	L	L
EMR17006_20170615_S_15A	Saline	M	0	0	1	1	X	0.0317206	0.324997	0.00398348	0.00645452	0.186992	0.239064	L	L
EMR17006_20170615_S_15B	Saline	M	1	1	1	0	X	0.00486883	5.83071e-08	2.49296e-06	0.574508	0.214437	-0.268293	L	R
EMR17006_20170615_S_17A	Saline	M	1	0	1	1	X	0.00649831	0.173617	7.11508e-05	0.00294466	-0.044186	-0.0780591	R	R
EMR17006_20170615_S_17B	Saline	M	1	0	1	0	X	2.05277e-11	0.282749	1.30366e-11	0.531684	0.799043	0.78	L	L
EMR17006_20170615_S_23A	Saline	M	1	0	1	1	X	0.00752014	0.882702	0.00131674	0.00401483	0.13285	-0.0319767	L	R
EMR17006_20170615_S_25A	Saline	M	1	1	1	1	X	1.16866e-11	5.4433e-14	3.12955e-06	0.00147971	0.12069	-0.162162	L	R
EMR17006_20170615_S_27A	Saline	M	1	1	1	1	X	0.00257454	0.00133284	0.00104033	0.000963835	-0.00584795	-0.0595611	R	R
EMR17006_20170615_S_27B	Saline	M	1	1	1	1	X	3.5447e-09	8.80658e-08	7.70544e-09	2.67876e-08	0.221374	-0.0526316	L	R
EMR17006_20170615_S_31A	Saline	M	0	0	0	1	X	0.433755	0.521966	0.522575	0.00265524	0.0185185	0.0970464	L	L
EMR17007_20170614_S_01A	Saline	M	0	0	0	0		0.28298	0.0486812	0.531514	0.333721	-0.144414	-0.187359	R	R
EMR17007_20170614_S_01B	Saline	M	0	0	0	0		0.360174	0.318676	0.867189	0.233944	0.52	0.266667	L	L
EMR17007_20170614_S_03A	Saline	M	1	1	1	0	X	7.85753e-07	0.000955417	1.88158e-06	0.916058	0.0712329	0.178231	L	L
EMR17007_20170614_S_03B	Saline	M	0	0	1	1	X	0.0441034	0.256828	0.00238384	0.0108155	0.0251256	0.0266667	L	L
EMR17007_20170614_S_05A	Saline	M	0	0	0	0		0.925805	0.0449716	0.750244	0.932143	0.243243	-0.0384615	L	R
EMR17007_20170614_S_07A	Saline	M	0	1	1	0	X	0.26159	0.00291952	6.94822e-05	0.489453	-0.189189	-0.176582	R	R
EMR17007_20170614_S_09A	Saline	M	1	1	0	0	X	0.0122	3.50891e-05	0.9939	0.0293981	-0.290909	-0.257485	R	R
EMR17007_20170614_S_09B	Saline	M	0	0	0	0		0.535699	0.0597189	0.522891	0.0413727	-0.34375	-0.577465	R	R
EMR17007_20170614_S_11A	Saline	M	0	0	1	0	X	0.034082	0.283875	5.15041e-07	0.998284	-0.378378	-0.429553	R	R
EMR17007_20170614_S_11B	Saline	M	0	0	0	0		0.0983327	0.225092	0.452663	0.955824	0.125	0.166667	L	L
EMR17007_20170614_S_17A	Saline	M	1	0	0	0	X	0.00341475	0.645456	0.147136	0.467888	0.276596	0.192547	L	L
EMR17007_20170614_S_17B	Saline	M	0	0	0	0		0.0901129	0.0577857	0.0868931	0.767948	-0.0392157	0.224138	R	L
EMR17007_20170614_S_23A	Saline	M	0	1	1	1	X	0.0287884	0.0111749	7.00602e-14	5.41985e-07	-0.00636537	-0.0734767	R	R
EMR17007_20170614_S_23B	Saline	M	0	0	1	0	X	0.0949076	0.727198	2.55918e-09	0.0173736	-0.0612731	-0.119462	R	R
EMR17007_20170614_S_27A	Saline	M	1	1	1	1	X	2.01788e-08	0.0016639	1.53085e-32	1.1983e-06	-0.175799	-0.318623	R	R
EMR17007_20170614_S_27B	Saline	M	0	0	0	0		0.357393	0.0462696	0.676628	0.280138	-0.3	-0.148936	R	R
EMR17008_20170629_S_01A	Saline	M	1	1	1	1	X	8.3243e-07	0.000744822	6.72533e-14	2.86841e-06	-0.0457516	-0.0974978	R	R
EMR17008_20170629_S_01B	Saline	M	1	1	0	0	X	0.00994526	2.47059e-11	0.451444	0.946272	0.249673	0.0659026	L	L
EMR17008_20170629_S_01C	Saline	M	1	1	1	1	X	0.001181	1.7428e-05	0.000151341	8.48178e-22	0.290234	0.471345	L	L
EMR17008_20170629_S_01D	Saline	M	0	0	1	0	X	0.0930742	0.664384	0.00219969	0.0722476	0.103718	0.202532	L	L
EMR17008_20170629_S_03A	Saline	M	0	0	0	0		0.902771	0.673507	0.990781	0.864013	0.00163132	0.00470035	L	L
EMR17008_20170629_S_05A	Saline	M	0	1	1	0	X	0.815509	3.25079e-11	2.91751e-12	0.0337137	0.219616	0.384886	L	L
EMR17008_20170629_S_09A	Saline	M	0	0	1	1	X	0.124857	0.0279618	0.00111512	8.12905e-07	0.0559611	0.0920245	L	L
EMR17008_20170629_S_11A	Saline	M	1	1	0	1	X	0.00367508	1.2046e-50	0.210994	8.83223e-70	0.811665	0.912237	L	L
EMR17008_20170629_S_11B	Saline	M	1	0	1	1	X	5.03237e-15	0.0158048	4.83538e-34	3.54409e-09	-0.397129	-0.360502	R	R
EMR17008_20170629_S_11C	Saline	M	1	0	1	0	X	6.08122e-13	0.819417	0.000158747	0.97239	-0.518519	-0.346341	R	R
EMR17008_20170629_S_17A	Saline	M	0	1	0	1	X	0.0903969	0.00137817	0.143044	0.000452763	-0.0901639	0.0941476	R	L
EMR17008_20170629_S_17B	Saline	M	0	0	0	0		0.711274	0.713386	0.916418	0.568574	0.0185185	0.074184	L	L
EMR17008_20170629_S_17C	Saline	M	1	1	1	1	X	7.11619e-05	2.55745e-08	5.83108e-09	5.06599e-07	-0.0346369	0.0564103	R	L
EMR17008_20170629_S_19A	Saline	M	1	1	1	0	X	6.26516e-12	0.000332775	1.71684e-12	0.653136	-0.137615	-0.282759	R	R
EMR17008_20170629_S_19B	Saline	M	1	1	1	1	X	0.000713651	1.05773e-06	0.000469169	4.11283e-14	0.0647343	0.162362	L	L
EMR17008_20170629_S_19C	Saline	M	0	0	0	0		0.977884	0.129469	0.922278	0.942135	0.0642857	0.0152905	L	L
EMR17008_20170629_S_21A	Saline	M	1	1	0	0	X	5.20006e-05	7.91497e-08	0.0306818	0.245196	-0.12933	0.077728	R	L
EMR17008_20170629_S_21B	Saline	M	1	1	0	0	X	0.000737689	1.37836e-09	0.508801	0.13585	0.123404	0.0499244	L	L
EMR17008_20170629_S_21C	Saline	M	1	1	1	1	X	2.31096e-36	2.44787e-13	3.22261e-32	2.07458e-06	-0.132293	-0.219304	R	R
EMR17008_20170629_S_21D	Saline	M	0	1	1	0	X	0.334624	0.00362466	0.000890568	0.124499	-0.0792683	-0.0643016	R	R
EMR17008_20170629_S_23A	Saline	M	1	1	1	1	X	4.16868e-12	5.10909e-10	2.03562e-15	1.89413e-05	0.168724	0.563786	L	L
EMR17008_20170629_S_23B	Saline	M	1	1	1	1	X	1.67179e-09	1.17636e-48	0.00132534	5.55411e-42	0.298054	0.349693	L	L
EMR17008_20170629_S_23C	Saline	M	1	0	1	1	X	9.44494e-06	0.409201	1.71992e-08	0.000520419	0.28	0.548583	L	L
EMR17008_20170629_S_23D	Saline	M	1	1	1	1	X	0.00620485	2.85296e-08	6.59984e-07	1.77056e-12	0.609562	0.842105	L	L
EMR17008_20170629_S_23E	Saline	M	0	1	0	1	X	0.222274	1.12797e-05	0.241401	3.99845e-28	0.19891	0.51167	L	L
EMR17008_20170629_S_25A	Saline	M	1	0	0	0	X	2.67084e-13	0.51938	0.0284451	0.393862	-0.613793	-0.42515	R	R
EMR17008_20170629_S_25B	Saline	M	0	0	0	0		0.0941122	0.0736647	0.237127	0.0670647	-0.438596	-0.43299	R	R
EMR17008_20170629_S_27A	Saline	M	0	0	0	0		0.864146	0.0958011	0.700094	0.639527	0.2	0.0190114	L	L
EMR17008_20170629_S_27B	Saline	M	0	0	0	1	X	0.743157	0.371071	0.393122	2.88022e-05	-0.333333	0.525424	R	L
EMR17008_20170629_S_29A	Saline	M	1	0	1	1	X	0.000418847	0.409741	7.68865e-06	0.00197344	-0.103448	-0.047836	R	R
EMR17008_20170629_S_29B	Saline	M	1	0	1	0	X	3.42326e-23	0.176002	4.44408e-20	0.278525	-0.690909	-0.762712	R	R
CDH16002_20161103_PA10_01A	Propranolol	F	0	0	0	0		0.452294	0.801427	0.0188306	0.218102	-0.0445344	-0.0733591	R	R
CDH16002_20161103_PA10_17A	Propranolol	F	0	0	0	0		0.0853538	0.396693	0.79807	0.544848	-0.351351	-0.3	R	R
CDH16002_20161103_PA10_19A	Propranolol	F	0	0	0	0		0.262208	0.262208	0.873562	0.930191	0	-0.25		R
CDH16002_20161103_PA10_19B	Propranolol	F	0	1	0	0	X	0.935783	0.00913187	0.0270966	0.165117	-0.192982	-0.0762712	R	R
CDH16002_20161103_PA10_19C	Propranolol	F	0	0	0	0		0.0442248	0.494139	0.96247	0.0408326	0.11236	-0.341463	L	R
CDH16003_20161102_PA10_01A	Propranolol	F	1	1	1	0	X	9.6527e-06	0.000696122	3.75956e-05	0.171767	0.156364	0.229236	L	L
CDH16003_20161102_PA10_25A	Propranolol	F	0	0	1	1	X	0.246696	0.0281358	0.000434426	0.000545939	0.12	-0.0166667	L	R
CDH16005_20161107_PA10_05A	Propranolol	M	1	1	1	1	X	2.30579e-05	2.7031e-05	0.000878871	3.52818e-09	0.0201207	0.0813492	L	L
CDH16005_20161107_PA10_07A	Propranolol	M	0	0	1	1	X	0.518199	0.285623	0.000154153	8.95885e-05	0.0279955	-0.0632911	L	R
CDH16005_20161107_PA10_09A	Propranolol	M	0	0	0	0		0.261688	0.58455	0.065644	0.761028	0.264516	0.282443	L	L
CDH16005_20161107_PA10_09B	Propranolol	M	0	0	0	0		0.450838	0.414867	0.390432	0.947767	0.0173913	-0.125581	L	R
CDH16005_20161107_PA10_13A	Propranolol	M	0	0	0	1	X	0.147124	0.942345	0.231579	0.000582267	-0.0515971	-0.315476	R	R
CDH16005_20161107_PA10_15A	Propranolol	M	0	0	0	0		0.569459	0.178642	0.0477119	0.463925	-0.0853994	-0.112676	R	R
CDH16005_20161107_PA10_21A	Propranolol	M	0	0	1	0	X	0.0186446	0.453184	0.000115353	0.934228	0.0906149	0.131175	L	L
CDH16005_20161107_PA10_21B	Propranolol	M	0	0	0	0		0.240116	0.0188301	0.638512	0.939842	-0.0687831	-0.0826446	R	R
CDH16005_20161107_PA10_21C	Propranolol	M	0	0	0	0		0.396398	0.536941	0.430834	0.170027	0.0819672	0.36	L	L
CDH16008_20161102_PA10_19A	Propranolol	M	1	1	1	1	X	1.6271e-33	0.000599146	9.2301e-34	0.00418847	-0.671498	-0.661442	R	R
CDH16010_20161104_PA10_01A	Propranolol	F	0	0	0	0		0.606161	0.0616969	0.240982	0.62378	0.1133	-0.269231	L	R
CDH16010_20161104_PA10_01B	Propranolol	F	1	0	0	0	X	0.00274611	0.0837932	0.0951359	0.852603	0.104072	-0.0791367	L	R
CDH16010_20161104_PA10_01C	Propranolol	F	0	0	0	0		0.32374	0.897585	0.275297	0.348664	-0.214286	0.6	R	L
CDH16010_20161104_PA10_05A	Propranolol	F	0	0	0	0		0.24214	0.12491	0.859264	0.451326	-0.105882	-0.366667	R	R
CDH16010_20161104_PA10_05B	Propranolol	F	0	0	0	0		0.201584	0.0985142	0.822135	0.802276	0.0421053	-0.277778	L	R
CDH16010_20161104_PA10_05C	Propranolol	F	0	0	0	1	X	0.974509	0.63081	0.024465	0.0017816	-0.0504202	-0.65625	R	R
CDH16010_20161104_PA10_07A	Propranolol	F	0	0	1	0	X	0.0462778	0.739393	2.47127e-07	0.415662	-0.0917874	-0.395683	R	R
CDH16010_20161104_PA10_07B	Propranolol	F	0	0	1	0	X	1	0.650537	0.000269783	0.0542814	0.0193548	-0.307087	L	R
CDH16010_20161104_PA10_11A	Propranolol	F	0	0	0	0		0.0929306	0.548084	0.126417	0.0203194	-0.106082	-0.165501	R	R
CDH16010_20161104_PA10_13A	Propranolol	F	0	0	1	0	X	0.663018	0.286461	1.70822e-05	0.306676	-0.111111	-0.382716	R	R
CDH16010_20161104_PA10_15A	Propranolol	F	0	0	1	0	X	0.113837	0.148229	0.00350574	0.150157	-0.0162749	0.0900901	R	L
CDH16010_20161104_PA10_15B	Propranolol	F	0	1	0	0	X	0.0397862	0.00421412	0.694161	0.149139	0.027451	-0.393258	L	R
CDH16010_20161104_PA10_17A	Propranolol	F	0	0	0	0		0.292336	0.250943	0.381027	0.316404	-0.0128755	-0.191257	R	R
CDH16010_20161104_PA10_17B	Propranolol	F	0	0	1	1	X	0.252726	0.175641	0.0124783	0.00383729	-0.047619	-0.122581	R	R
CDH16010_20161104_PA10_17C	Propranolol	F	0	0	0	0		0.8892	0.0372698	0.568789	0.0235911	-0.2	-0.470588	R	R
CDH16010_20161104_PA10_21A	Propranolol	F	0	0	1	0	X	0.0564423	0.136456	0.000202642	0.0518019	0.0277778	0	L
CDH16010_20161104_PA10_21B	Propranolol	F	0	0	0	0		0.110571	0.928083	0.76114	0.680813	0.0522088	-0.174377	L	R
CDH16010_20161104_PA10_21C	Propranolol	F	0	0	0	1	X	0.146615	0.649222	0.20819	0.00014777	0.0450928	-0.506667	L	R
CDH16010_20161104_PA10_23A	Propranolol	F	1	0	0	0	X	0.00726682	0.015595	0.770651	0.775707	0.033557	-0.149606	L	R
CDH16010_20161104_PA10_23B	Propranolol	F	1	1	0	0	X	9.28061e-08	2.58875e-12	0.0202897	0.0195525	0.0523732	-0.464373	L	R
CDH16010_20161104_PA10_23C	Propranolol	F	0	1	0	0	X	0.25199	7.33667e-06	0.723948	0.0673836	0.19774	-0.103448	L	R
CDH16010_20161104_PA10_23D	Propranolol	F	0	0	0	0		0.118265	0.659725	0.221724	0.0546411	0.188811	0.149425	L	L
CDH16010_20161104_PA10_23E	Propranolol	F	0	0	1	0	X	0.289152	0.496091	7.44482e-14	0.0974042	0.181818	-0.573529	L	R
CDH16010_20161104_PA10_25A	Propranolol	F	1	0	1	0	X	0.000137244	0.0573007	0.00172646	0.184317	0.2	0.0140845	L	L
CDH16010_20161104_PA10_25B	Propranolol	F	0	0	0	0		0.386498	0.496884	0.696549	0.0985084	0.0075188	0.010989	L	L
CDH16010_20161104_PA10_25C	Propranolol	F	0	0	0	0		0.028203	0.163401	0.407403	0.596461	0.0753769	-0.190476	L	R
CDH16010_20161104_PA10_25D	Propranolol	F	0	0	0	0		0.0149625	0.0227077	0.0304056	0.0621791	0.111111	-1	L	R
CDH16010_20161104_PA10_27A	Propranolol	F	1	1	0	0	X	0.000119035	0.00285095	0.0418676	0.984164	-0.0697143	-0.0939597	R	R
CDH16010_20161104_PA10_27B	Propranolol	F	1	1	0	0	X	0.00740748	0.000618467	0.659837	0.164761	0.0237581	-0.277612	L	R
CDH16010_20161104_PA10_29A	Propranolol	F	1	1	0	1	X	7.47013e-05	0.00010193	0.292467	0.000754089	-0.0151515	-0.636364	R	R
CDH16010_20161104_PA10_29B	Propranolol	F	0	0	0	0		0.743969	0.974589	0.725551	0.0282509	-0.0649351	-0.793103	R	R
CDH16010_20161104_PA10_29C	Propranolol	F	1	0	0	0	X	0.0044988	0.321896	0.754662	0.903288	0.222222	-0.226667	L	R
CDH16019_20161109_PA10_01A	Propranolol	M	0	0	0	0		0.621577	0.168875	0.0584796	0.0887137	-0.0884718	-0.25448	R	R
CDH16019_20161109_PA10_03A	Propranolol	M	0	1	0	1	X	0.0553349	3.33052e-05	0.0796826	0.00462598	0.57265	0.0841121	L	L
CDH16019_20161109_PA10_05A	Propranolol	M	1	1	1	1	X	8.99744e-08	1.38177e-09	0.000232989	4.93374e-05	-0.0835322	-0.314176	R	R
CDH16019_20161109_PA10_09A	Propranolol	M	1	1	0	0	X	0.0112043	0.00235518	0.0216559	0.0435368	-0.0422535	-0.243243	R	R
CDH16019_20161109_PA10_17A	Propranolol	M	0	0	0	0		0.969426	0.586684	0.692448	0.110726	-0.0358566	-0.0916335	R	R
CDH16019_20161109_PA10_21A	Propranolol	M	0	0	0	0		0.747257	0.506195	0.977198	0.662916	-0.0625	-0.3125	R	R
EMR17002_20170707_PA10_01A	Propranolol	F	1	1	0	0	X	0.0065342	2.69666e-06	0.910289	0.102163	0.136364	0.875	L	L
EMR17002_20170707_PA10_03A	Propranolol	F	0	0	0	0		0.959625	0.532893	0.589497	0.264262	-0.117647	0.789474	R	L
EMR17002_20170707_PA10_05A	Propranolol	F	0	1	0	0	X	0.164342	0.00123138	0.639001	0.116542	-0.561404	0.551724	R	L
EMR17002_20170707_PA10_07A	Propranolol	F	0	0	0	0		0.998602	0.012536	0.123822	0.643726	0.170341	0.983471	L	L
EMR17002_20170707_PA10_09A	Propranolol	F	0	0	0	0		0.186936	0.546713	0.676806	0.019336	-0.373494	0.849057	R	L
EMR17002_20170707_PA10_09B	Propranolol	F	0	0	0	0		0.142535	0.440677	0.477987	0.11435	0.2	1	L	L
EMR17002_20170707_PA10_11A	Propranolol	F	0	0	0	0		0.0788971	0.0230335	0.62052	0.0435827	0.00350877	0.755102	L	L
EMR17002_20170707_PA10_13A	Propranolol	F	0	0	0	0		0.198379	0.0799836	0.130253	0.937145	0.0588235	0.571429	L	L
EMR17002_20170707_PA10_19A	Propranolol	F	0	0	0	0		0.59181	0.177077	0.769908	0.958814	-0.183673	0.76	R	L
EMR17002_20170707_PA10_21A	Propranolol	F	0	0	0	0		0.730855	0.386365	0.57456	0.980617	-0.25	1	R	L
EMR17002_20170707_PA10_23A	Propranolol	F	0	0	0	0		0.75351	0.480612	0.874435	0.13433	-0.0735294	0.830986	R	L
EMR17002_20170707_PA10_23B	Propranolol	F	1	1	0	0	X	0.0102331	0.00019007	0.436313	0.497634	0.0707071	0.714286	L	L
EMR17002_20170707_PA10_27A	Propranolol	F	0	0	0	0		0.383332	0.50247	0.451041	0.107677	0	1		L
EMR17002_20170707_PA10_31A	Propranolol	F	0	1	0	1	X	0.676951	0.000856603	0.0694545	0.00192254	0.346939	0.75	L	L
EMR17002_20170707_PA10_31B	Propranolol	F	0	0	0	0		0.613773	0.923037	0.814187	0.478515	0.428571		L
EMR17004_20170703_PA10_03A	Propranolol	F	0	0	0	0		0.371666	0.392591	0.13358	0.466639		-1		R
EMR17004_20170703_PA10_03B	Propranolol	F	0	0	0	0		0.810054	0.250684	0.401558	0.617856	-0.3	0.333333	R	L
EMR17004_20170703_PA10_11A	Propranolol	F	0	0	0	0		0.760367	0.486905	0.119595	0.122324	-0.176471	0.391304	R	L
EMR17004_20170703_PA10_11B	Propranolol	F	0	0	0	0		0.0561418	0.0978257	0.473463	0.150013	-0.0188679	0.407407	R	L
EMR17004_20170703_PA10_13A	Propranolol	F	0	0	0	0		0.776322	0.525141	0.562873	0.263333	0.128205	0.4	L	L
EMR17004_20170703_PA10_17A	Propranolol	F	0	0	0	1	X	0.576259	0.484241	0.664999	0.00434864	-0.0967742	0.674419	R	L
EMR17004_20170703_PA10_17B	Propranolol	F	0	0	0	0		0.905105	0.0270701	0.366984	0.124144	0.384615	0.478261	L	L
EMR17006_20170717_PA10_01A	Propranolol	M	0	0	1	0	X	0.0696433	0.0423891	0.000538802	0.229917	0.047619	-0.9	L	R
EMR17006_20170717_PA10_03A	Propranolol	M	0	0	0	0		0.931061	0.313976	0.556481	0.358235	-1	-1	R	R
EMR17006_20170717_PA10_03B	Propranolol	M	0	0	0	0		0.724853	0.269659	0.640851	0.193176	0.12	-0.416667	L	R
EMR17006_20170717_PA10_05A	Propranolol	M	0	0	0	0		0.289477	0.706609	0.0512705	0.445516	0.208333	0.0625	L	L
EMR17006_20170717_PA10_07A	Propranolol	M	1	0	1	0	X	0.0103095	0.0954179	6.55907e-05	0.043062	-0.153846	-0.405405	R	R
EMR17006_20170717_PA10_09A	Propranolol	M	1	0	1	1	X	4.92754e-05	0.290307	5.17399e-16	1.6981e-11	-0.186992	-0.15311	R	R
EMR17006_20170717_PA10_09B	Propranolol	M	0	0	1	1	X	0.140666	0.41243	9.70002e-05	0.000628964	-0.352941	-0.135135	R	R
EMR17006_20170717_PA10_11A	Propranolol	M	0	0	0	0		0.766414	0.336218	0.43148	0.343714	-0.894737	-1	R	R
EMR17006_20170717_PA10_11B	Propranolol	M	0	0	0	0		0.0461723	0.104899	0.330621	0.605459	0.166667	-0.047619	L	R
EMR17006_20170717_PA10_11C	Propranolol	M	0	0	0	1	X	0.0350511	0.347214	0.540182	0.000247017	-0.362162	-0.772152	R	R
EMR17006_20170717_PA10_11D	Propranolol	M	1	1	0	1	X	2.50821e-08	0.000611612	0.329853	3.65519e-06	-0.0703557	-0.546911	R	R
EMR17006_20170717_PA10_13A	Propranolol	M	0	0	0	0		0.293169	0.30082	0.33088	0.0584744	0	-0.485714		R
EMR17006_20170717_PA10_15A	Propranolol	M	1	1	1	1	X	2.48781e-08	4.64062e-14	1.70868e-09	0.002741	0.100733	-0.238095	L	R
EMR17006_20170717_PA10_15B	Propranolol	M	1	1	1	1	X	4.85074e-05	2.2717e-06	3.89161e-05	7.0734e-09	-0.109244	-0.626374	R	R
EMR17006_20170717_PA10_15C	Propranolol	M	0	0	0	1	X	0.547213	0.078561	0.113476	8.3114e-15	0.257329	0.331023	L	L
EMR17006_20170717_PA10_17A	Propranolol	M	1	1	1	1	X	0.00229759	0.000429236	4.86073e-10	2.7027e-05	0.0714286	-0.300613	L	R
EMR17006_20170717_PA10_17B	Propranolol	M	0	0	0	0		0.423181	0.228697	0.248808	0.725914	-0.428571	-0.263158	R	R
EMR17006_20170717_PA10_19A	Propranolol	M	1	1	0	0	X	0.00579917	0.00681451	0.0527787	0.0278451	0.0909091	-0.411765	L	R
EMR17006_20170717_PA10_19B	Propranolol	M	1	1	1	0	X	3.85867e-06	0.000869725	1.59602e-09	0.241877	-0.16129	-0.606557	R	R
EMR17006_20170717_PA10_23A	Propranolol	M	0	0	0	0		0.357765	0.587206	0.176569	0.420223	-0.0212766	-0.150943	R	R
EMR17006_20170717_PA10_25A	Propranolol	M	1	1	0	0	X	6.01058e-07	1.21896e-10	0.0704468	0.574866	0.139785	0.0980392	L	L
EMR17006_20170717_PA10_27A	Propranolol	M	1	1	1	1	X	0.000456557	0.00164481	3.08897e-05	0.0013061	0.078341	0.00606061	L	L
EMR17006_20170717_PA10_27B	Propranolol	M	0	0	0	0		0.23595	0.130058	0.207816	0.190233	-1	-0.666667	R	R
EMR17007_20170622_PA10_01A	Propranolol	M	1	0	1	0	X	0.000405863	0.918717	0.00315327	0.846146	-0.342857	-0.281768	R	R
EMR17007_20170622_PA10_03A	Propranolol	M	1	0	1	1	X	0.0116979	0.073834	0.000346196	0.0033331	0.0814815	0.110048	L	L
EMR17007_20170622_PA10_03B	Propranolol	M	0	0	1	0	X	0.608787	0.767635	0.0115294	0.103008	-0.0454545	0.113924	R	L
EMR17007_20170622_PA10_05A	Propranolol	M	0	0	0	0		0.305966	0.794586	0.866553	0.16355	0.180328	0.150685	L	L
EMR17007_20170622_PA10_05B	Propranolol	M	0	0	0	0		0.231863	0.925418	0.688449	0.547071	-0.0843373	0.130435	R	L
EMR17007_20170622_PA10_07A	Propranolol	M	0	0	0	0		0.883891	0.138252	0.032068	0.0136673	-0.0625	-0.0245614	R	R
EMR17007_20170622_PA10_09A	Propranolol	M	0	0	1	1	X	0.119046	0.0414473	4.18149e-06	0.000138261	0.0630631	-0.026738	L	R
EMR17007_20170622_PA10_09B	Propranolol	M	1	0	0	0	X	0.000162288	0.395416	0.0574356	0.144255	-0.617778	-0.550388	R	R
EMR17007_20170622_PA10_11A	Propranolol	M	0	0	0	0		0.417878	0.49183	0.164331	0.653891	0.0327869	-0.047619	L	R
EMR17007_20170622_PA10_11B	Propranolol	M	1	0	1	0	X	0.00528572	0.365747	1.52908e-06	0.0965178	-0.191489	-0.268722	R	R
EMR17007_20170622_PA10_17A	Propranolol	M	0	0	0	0		0.140422	0.172173	0.132564	0.91616	0.0588235	0.241379	L	L
EMR17007_20170622_PA10_17B	Propranolol	M	0	0	0	0		0.392022	0.727127	0.554455	0.880364	-0.2	-0.0697674	R	R
EMR17007_20170622_PA10_23A	Propranolol	M	0	0	1	0	X	0.383658	0.0452918	0.00221612	0.430171	0.0517073	-0.042487	L	R
EMR17007_20170622_PA10_23B	Propranolol	M	0	0	1	0	X	0.139833	0.375791	0.00650192	0.478116	-0.0322581	-0.129032	R	R
EMR17007_20170622_PA10_27A	Propranolol	M	0	1	0	1	X	0.0263083	0.00677529	0.0224607	1.35732e-17	0.0952381	0.485507	L	L
EMR17007_20170622_PA10_27B	Propranolol	M	0	0	1	0	X	0.0249919	0.8245	0.000567558	0.140276	-0.193182	-0.194444	R	R
EMR17007_20170622_PA10_27C	Propranolol	M	1	0	1	0	X	0.00460093	0.327874	0.000233231	0.995175	-0.243902	-0.5	R	R
EMR17008_20170718_PA10_01A	Propranolol	M	0	0	0	0		0.0183429	0.0146377	0.625885	0.23769	0.0163934	-0.52	L	R
EMR17008_20170718_PA10_03A	Propranolol	M	1	1	1	1	X	7.08416e-06	1.97049e-08	0.00205544	0.000732823	0.156098	-0.338912	L	R
EMR17008_20170718_PA10_05A	Propranolol	M	0	0	0	0		0.826949	0.710641	0.882242	0.917883	-0.0697674	-0.384615	R	R
EMR17008_20170718_PA10_05B	Propranolol	M	0	1	0	1	X	0.0682421	0.000535045	0.861557	0.000871292	0.131707	-0.0748299	L	R
EMR17008_20170718_PA10_09A	Propranolol	M	1	1	0	0	X	3.08955e-08	4.98854e-05	0.166929	0.584966	-0.112299	-0.473684	R	R
EMR17008_20170718_PA10_09B	Propranolol	M	0	1	0	0	X	0.0340721	0.0101864	0.872898	0.129716	0.0537634	-0.169811	L	R
EMR17008_20170718_PA10_11A	Propranolol	M	0	0	0	0		0.601519	0.787626	0.791945	0.734858	-0.166667	-0.5	R	R
EMR17008_20170718_PA10_11B	Propranolol	M	0	0	0	0		0.163869	0.151944	0.0174016	0.844676	0	0
EMR17008_20170718_PA10_11C	Propranolol	M	1	0	1	0	X	0.0010946	0.722953	1.8374e-05	0.807549	-0.813333	-0.929825	R	R
EMR17008_20170718_PA10_17A	Propranolol	M	0	0	0	0		0.0450098	0.27572	0.480419	0.750455	-0.137255	-0.415385	R	R
EMR17008_20170718_PA10_17B	Propranolol	M	0	0	0	0		0.777225	0.45657	0.4477	0.589895	0.102804	-0.261905	L	R
EMR17008_20170718_PA10_19A	Propranolol	M	1	1	0	0	X	1.30704e-06	0.000641729	0.937945	0.750544	-0.0745698	-0.410526	R	R
EMR17008_20170718_PA10_19B	Propranolol	M	1	1	0	0	X	5.12419e-05	0.00115982	0.624955	0.137152	-0.0373832	-0.578947	R	R
EMR17008_20170718_PA10_21A	Propranolol	M	0	1	0	0	X	0.0684424	0.000695578	0.101072	0.109469	0.131944	-0.0142857	L	R
EMR17008_20170718_PA10_21B	Propranolol	M	1	1	0	0	X	1.93511e-08	5.52302e-12	0.0221397	0.263551	0.0868347	-0.454545	L	R
EMR17008_20170718_PA10_21C	Propranolol	M	0	0	0	0		0.1795	0.168988	0.716363	0.154918	-0.0294118	-0.245283	R	R
EMR17008_20170718_PA10_21D	Propranolol	M	0	0	0	0		0.391202	0.987567	0.867808	0.165687	0.0746269	-0.253731	L	R
EMR17008_20170718_PA10_21E	Propranolol	M	0	0	0	0		0.677281	0.527655	0.993976	0.751075	-0.146067	-0.428571	R	R
EMR17008_20170718_PA10_23A	Propranolol	M	0	0	1	1	X	0.0229674	0.224779	0.000160385	4.35955e-07	0.148936	0.550725	L	L
EMR17008_20170718_PA10_23B	Propranolol	M	0	0	1	0	X	0.363988	0.386971	1.56092e-06	0.0651766	0.0163934	-0.150327	L	R
EMR17008_20170718_PA10_23C	Propranolol	M	0	0	0	1	X	0.066318	0.0310299	0.125692	1.4722e-05	0.00754717	-0.20082	L	R
EMR17008_20170718_PA10_23D	Propranolol	M	0	0	0	1	X	0.566358	0.964911	0.181946	0.000982394	0.0418605	-0.0380952	L	R
EMR17008_20170718_PA10_29A	Propranolol	M	0	0	1	0	X	0.0318301	0.0219301	0.000132172	0.29592	0.0421456	-0.53125	L	R
EMR17008_20170718_PA10_29B	Propranolol	M	0	0	0	0		0.031544	0.343414	0.666588	0.929899	-0.35	-0.466667	R	R
EMR17008_20170718_PA10_31A	Propranolol	M	0	0	1	0	X	0.027269	0.639547	0.000767594	0.253836	-0.666667	-0.636364	R	R

## Sheet: FiringRate
ID	Treatment	sex	Included?	mean FR	sidePref CUE	sidepref LP
CDH16002_20161017_S_01A	Saline	F	X	4.92187	L	L
CDH16002_20161017_S_17A	Saline	F		0.778459	R	L
CDH16002_20161017_S_19A	Saline	F		6.73727	L	L
CDH16003_20161018_S_17A	Saline	F	X	3.83693	R	R
CDH16005_20161021_S_05A	Saline	M	X	1.11197	L	L
CDH16005_20161021_S_07A	Saline	M		2.69956	L	L
CDH16005_20161021_S_07B	Saline	M	X	12.8663	L	L
CDH16005_20161021_S_07C	Saline	M	X	4.53203	R	L
CDH16005_20161021_S_07D	Saline	M		6.35186	L	L
CDH16005_20161021_S_09A	Saline	M		2.44788	R	R
CDH16005_20161021_S_09B	Saline	M		1.33382	R	R
CDH16005_20161021_S_09C	Saline	M	X	1.75166	R	R
CDH16005_20161021_S_09D	Saline	M		1.23204	L	L
CDH16005_20161021_S_09E	Saline	M		0.846296	L	L
CDH16005_20161021_S_13A	Saline	M		9.42931	R	L
CDH16005_20161021_S_15A	Saline	M	X	12.7216	L	L
CDH16005_20161021_S_15B	Saline	M	X	1.72828	L	L
CDH16005_20161021_S_15C	Saline	M	X	6.30328	R	R
CDH16005_20161021_S_17A	Saline	M	X	1.29171	R	L
CDH16005_20161021_S_17B	Saline	M		1.60029	R	R
CDH16005_20161021_S_17C	Saline	M	X	0.702653	L	L
CDH16005_20161021_S_17D	Saline	M		0.931149	R	R
CDH16005_20161021_S_17E	Saline	M		1.33149	L	L
CDH16005_20161021_S_17F	Saline	M	X	0.249072	R	L
CDH16005_20161021_S_21A	Saline	M	X	7.63489	R	R
CDH16005_20161021_S_21B	Saline	M	X	7.28966	R	L
CDH16005_20161021_S_21C	Saline	M		0.936092	R	L
CDH16005_20161021_S_21D	Saline	M		1.90862	L	L
CDH16005_20161021_S_25A	Saline	M	X	4.58358	R	L
CDH16005_20161021_S_25B	Saline	M		10.6416	L	L
CDH16005_20161021_S_25C	Saline	M		5.49908	L	L
CDH16005_20161021_S_25D	Saline	M		8.28387	R	L
CDH16005_20161021_S_25E	Saline	M		2.34867	R	L
CDH16005_20161021_S_31A	Saline	M	X	3.79116	L	L
CDH16008_20161019_S_09A	Saline	M		1.85709	L
CDH16008_20161019_S_23A	Saline	M		2.61938	R	L
CDH16010_20161025_S_01A	Saline	F	X	3.96763	R	R
CDH16010_20161025_S_01B	Saline	F		0.982844	R	R
CDH16010_20161025_S_05A	Saline	F	X	7.19117	L	R
CDH16010_20161025_S_05B	Saline	F	X	2.5198	R	R
CDH16010_20161025_S_07A	Saline	F		4.91625	L	L
CDH16010_20161025_S_07B	Saline	F	X	3.26743	R	R
CDH16010_20161025_S_11A	Saline	F	X	3.13894	R	R
CDH16010_20161025_S_13A	Saline	F		1.91813	R	R
CDH16010_20161025_S_15A	Saline	F	X	3.05826	L	L
CDH16010_20161025_S_17A	Saline	F		3.64775	R	R
CDH16010_20161025_S_17B	Saline	F	X	4.93488	L	R
CDH16010_20161025_S_21A	Saline	F	X	10.2837	R	R
CDH16010_20161025_S_21B	Saline	F	X	11.334	L	R
CDH16010_20161025_S_23A	Saline	F	X	11.4764	L	R
CDH16010_20161025_S_23B	Saline	F	X	6.95356	L	R
CDH16010_20161025_S_23C	Saline	F		7.86062	L	R
CDH16010_20161025_S_23D	Saline	F	X	4.5674	L	L
CDH16010_20161025_S_25A	Saline	F	X	5.17396	L	R
CDH16010_20161025_S_25B	Saline	F	X	3.1652	L	L
CDH16010_20161025_S_25C	Saline	F	X	6.67708	L	R
CDH16010_20161025_S_25D	Saline	F	X	3.56288	R	L
CDH16010_20161025_S_25E	Saline	F		5.42667	R	R
CDH16010_20161025_S_27A	Saline	F	X	3.62119	R	R
CDH16010_20161025_S_27B	Saline	F	X	6.18698	L	L
CDH16010_20161025_S_27C	Saline	F	X	3.79931	R	R
CDH16010_20161025_S_27D	Saline	F		1.57072	L	R
CDH16010_20161025_S_27E	Saline	F	X	6.52361	R	R
CDH16010_20161025_S_29A	Saline	F		6.4246	R	R
CDH16010_20161025_S_29B	Saline	F	X	9.41873	L	L
CDH16011_20161027_S_09A	Saline	F	X	3.38358	L	L
CDH16011_20161027_S_15A	Saline	F	X	10.8648	R	L
CDH16011_20161027_S_29A	Saline	F	X	1.50298	R	R
CDH16011_20161027_S_31A	Saline	F	X	1.0686	L	L
CDH169019_20161018_S_01A	Saline	M	X	6.4909	R	R
CDH169019_20161018_S_03A	Saline	M	X	2.12234	R	R
CDH169019_20161018_S_05A	Saline	M	X	3.23655	L	L
CDH169019_20161018_S_09A	Saline	M	X	4.55052	R	R
CDH169019_20161018_S_09B	Saline	M	X	3.93922	R	L
CDH169019_20161018_S_09C	Saline	M	X	6.32946	L	L
CDH169019_20161018_S_21A	Saline	M	X	3.60124	R	R
CDH169019_20161018_S_25A	Saline	M	X	1.5571	L	L
EMR17001_20170705_S_03A	Saline	F	X	2.53278	L	L
EMR17001_20170705_S_07A	Saline	F	X	0.824574	R	L
EMR17001_20170705_S_07B	Saline	F		0.477471	R	R
EMR17001_20170705_S_09A	Saline	F	X	0.8	L	L
EMR17001_20170705_S_09B	Saline	F	X	0.410145	L	L
EMR17001_20170705_S_11A	Saline	F		0.38573	L	L
EMR17001_20170705_S_15A	Saline	F	X	2.23657
EMR17001_20170705_S_15B	Saline	F		0.996724
EMR17001_20170705_S_15C	Saline	F	X	2.87368	R	R
EMR17001_20170705_S_17A	Saline	F	X	2.95366	R	L
EMR17001_20170705_S_17B	Saline	F		1.58427	L	L
EMR17001_20170705_S_21A	Saline	F	X	5.22773	L	L
EMR17001_20170705_S_21B	Saline	F		0.92277	L	L
EMR17001_20170705_S_23A	Saline	F	X	4.22069	R	R
EMR17001_20170705_S_23B	Saline	F	X	1.87142	L	L
EMR17001_20170705_S_23C	Saline	F	X	3.46396	R	R
EMR17001_20170705_S_25A	Saline	F		0.226909	R
EMR17001_20170705_S_25B	Saline	F	X	1.87545	R	R
EMR17001_20170705_S_25C	Saline	F	X	4.12785	L	L
EMR17001_20170705_S_25D	Saline	F	X	2.48895	L	L
EMR17001_20170705_S_25E	Saline	F		1.24837	L	L
EMR17001_20170705_S_27A	Saline	F		0.140463
EMR17001_20170705_S_27B	Saline	F		0.200511	L	L
EMR17001_20170705_S_27C	Saline	F	X	0.625408	L	L
EMR17001_20170705_S_27D	Saline	F		0.096846	R
EMR17001_20170705_S_29A	Saline	F	X	1.92322	L	L
EMR17001_20170705_S_31A	Saline	F	X	0.545092	L	L
EMR17002_20170824_S_01A	Saline	F	X	3.25521	L	L
EMR17002_20170824_S_05A	Saline	F	X	7.8262	R	R
EMR17002_20170824_S_07A	Saline	F	X	0.80117	R	L
EMR17002_20170824_S_09A	Saline	F	X	4.78493	L	L
EMR17002_20170824_S_09B	Saline	F	X	1.80146	R	R
EMR17002_20170824_S_11A	Saline	F	X	0.738191	L	L
EMR17002_20170824_S_11B	Saline	F		0.492685	L	L
EMR17002_20170824_S_23A	Saline	F		0.821507	L	L
EMR17002_20170824_S_23B	Saline	F	X	1.31981	L	L
EMR17002_20170824_S_27A	Saline	F		1.25969	R	R
EMR17002_20170824_S_31A	Saline	F	X	1.69031	L	L
EMR17003_20170612_S_05A	Saline	F		0.387565	R	R
EMR17003_20170612_S_09A	Saline	F	X	2.72841	R	L
EMR17003_20170612_S_09B	Saline	F	X	1.98967	R	R
EMR17003_20170612_S_11A	Saline	F		1.29104	L	L
EMR17003_20170612_S_13A	Saline	F	X	1.15725	R	L
EMR17003_20170612_S_17A	Saline	F	X	2.27565	L	L
EMR17003_20170612_S_17B	Saline	F	X	2.23994	L	L
EMR17003_20170612_S_17C	Saline	F	X	1.56158	R	R
EMR17003_20170612_S_19A	Saline	F	X	0.88774	L	L
EMR17003_20170612_S_21A	Saline	F	X	0.817375	L	L
EMR17003_20170612_S_21B	Saline	F	X	1.44535	R	L
EMR17003_20170612_S_23A	Saline	F	X	0.61232	R
EMR17003_20170612_S_23B	Saline	F	X	0.745018	L	L
EMR17003_20170612_S_25A	Saline	F	X	2.24177	L	L
EMR17003_20170612_S_25B	Saline	F		0.457333		L
EMR17003_20170612_S_27A	Saline	F		0.357222	R	L
EMR17003_20170612_S_29A	Saline	F	X	2.80155	L	L
EMR17004_20170807_S_03A	Saline	F		1.79643	L	L
EMR17004_20170807_S_03B	Saline	F	X	1.06778	R	L
EMR17004_20170807_S_07A	Saline	F	X	0.251393		L
EMR17004_20170807_S_09A	Saline	F	X	1.29267	R	R
EMR17004_20170807_S_11A	Saline	F	X	1.95918	L	L
EMR17004_20170807_S_17A	Saline	F	X	4.62051	L	L
EMR17006_20170615_S_01A	Saline	M	X	1.25724	R	R
EMR17006_20170615_S_03A	Saline	M		1.95321	L
EMR17006_20170615_S_05A	Saline	M	X	4.07638	R	L
EMR17006_20170615_S_07A	Saline	M		0.483676	L	L
EMR17006_20170615_S_09A	Saline	M	X	1.84292	R	R
EMR17006_20170615_S_09B	Saline	M		1.42905	R	R
EMR17006_20170615_S_11A	Saline	M		1.34853	L	L
EMR17006_20170615_S_11B	Saline	M	X	2.82503	R	R
EMR17006_20170615_S_11C	Saline	M		0.706757	L	R
EMR17006_20170615_S_11D	Saline	M		0.235536
EMR17006_20170615_S_13A	Saline	M	X	3.86965	L	L
EMR17006_20170615_S_15A	Saline	M	X	13.8503	L	L
EMR17006_20170615_S_15B	Saline	M	X	4.2712	L	R
EMR17006_20170615_S_17A	Saline	M	X	10.8604	R	R
EMR17006_20170615_S_17B	Saline	M	X	2.92932	L	L
EMR17006_20170615_S_23A	Saline	M	X	10.9492	L	R
EMR17006_20170615_S_25A	Saline	M	X	1.67656	L	R
EMR17006_20170615_S_27A	Saline	M	X	6.00337	R	R
EMR17006_20170615_S_27B	Saline	M	X	5.4391	L	R
EMR17006_20170615_S_31A	Saline	M	X	2.40438	L	L
EMR17007_20170614_S_01A	Saline	M		3.76047	R	R
EMR17007_20170614_S_01B	Saline	M		0.262318	L	L
EMR17007_20170614_S_03A	Saline	M	X	7.07887	L	L
EMR17007_20170614_S_03B	Saline	M	X	3.34313	L	L
EMR17007_20170614_S_05A	Saline	M		0.503978	L	R
EMR17007_20170614_S_07A	Saline	M	X	8.79142	R	R
EMR17007_20170614_S_09A	Saline	M	X	1.59294	R	R
EMR17007_20170614_S_09B	Saline	M		2.44998	R	R
EMR17007_20170614_S_11A	Saline	M	X	1.96366	R	R
EMR17007_20170614_S_11B	Saline	M		0.319363	L	L
EMR17007_20170614_S_17A	Saline	M	X	1.34753	L	L
EMR17007_20170614_S_17B	Saline	M		1.49533	R	L
EMR17007_20170614_S_23A	Saline	M	X	14.7433	R	R
EMR17007_20170614_S_23B	Saline	M	X	11.148	R	R
EMR17007_20170614_S_27A	Saline	M	X	5.31672	R	R
EMR17007_20170614_S_27B	Saline	M		0.702768	R	R
EMR17008_20170629_S_01A	Saline	M	X	8.82927	R	R
EMR17008_20170629_S_01B	Saline	M	X	2.83622	L	L
EMR17008_20170629_S_01C	Saline	M	X	5.13972	L	L
EMR17008_20170629_S_01D	Saline	M	X	4.55956	L	L
EMR17008_20170629_S_03A	Saline	M		16.9173	L	L
EMR17008_20170629_S_05A	Saline	M	X	5.93706	L	L
EMR17008_20170629_S_09A	Saline	M	X	3.4058	L	L
EMR17008_20170629_S_11A	Saline	M	X	1.93695	L	L
EMR17008_20170629_S_11B	Saline	M	X	1.28126	R	R
EMR17008_20170629_S_11C	Saline	M	X	1.71358	R	R
EMR17008_20170629_S_17A	Saline	M	X	7.43211	R	L
EMR17008_20170629_S_17B	Saline	M		3.43231	L	L
EMR17008_20170629_S_17C	Saline	M	X	10.3807	R	L
EMR17008_20170629_S_19A	Saline	M	X	5.08062	R	R
EMR17008_20170629_S_19B	Saline	M	X	9.45599	L	L
EMR17008_20170629_S_19C	Saline	M		9.81294	L	L
EMR17008_20170629_S_21A	Saline	M	X	16.8431	R	L
EMR17008_20170629_S_21B	Saline	M	X	5.25743	L	L
EMR17008_20170629_S_21C	Saline	M	X	6.29218	R	R
EMR17008_20170629_S_21D	Saline	M	X	3.09724	R	R
EMR17008_20170629_S_23A	Saline	M	X	5.79455	L	L
EMR17008_20170629_S_23B	Saline	M	X	15.0969	L	L
EMR17008_20170629_S_23C	Saline	M	X	14.1152	L	L
EMR17008_20170629_S_23D	Saline	M	X	2.31235	L	L
EMR17008_20170629_S_23E	Saline	M	X	3.54156	L	L
EMR17008_20170629_S_25A	Saline	M	X	1.56834	R	R
EMR17008_20170629_S_25B	Saline	M		2.20863	R	R
EMR17008_20170629_S_27A	Saline	M		3.57532	L	L
EMR17008_20170629_S_27B	Saline	M	X	0.601279	R	L
EMR17008_20170629_S_29A	Saline	M	X	3.59138	R	R
EMR17008_20170629_S_29B	Saline	M	X	0.342199	R	R
CDH16002_20161103_PA10_01A	Propranolol	F		7.25402	R	R
CDH16002_20161103_PA10_17A	Propranolol	F		0.775449	R	R
CDH16002_20161103_PA10_19A	Propranolol	F		0.451054		R
CDH16002_20161103_PA10_19B	Propranolol	F	X	9.77628	R	R
CDH16002_20161103_PA10_19C	Propranolol	F		11.6839	L	R
CDH16003_20161102_PA10_01A	Propranolol	F	X	5.3032	L	L
CDH16003_20161102_PA10_25A	Propranolol	F	X	1.17049	L	R
CDH16005_20161107_PA10_05A	Propranolol	M	X	8.93351	L	L
CDH16005_20161107_PA10_07A	Propranolol	M	X	12.9586	L	R
CDH16005_20161107_PA10_09A	Propranolol	M		2.35054	L	L
CDH16005_20161107_PA10_09B	Propranolol	M		2.98696	L	R
CDH16005_20161107_PA10_13A	Propranolol	M	X	5.9837	R	R
CDH16005_20161107_PA10_15A	Propranolol	M		5.58735	R	R
CDH16005_20161107_PA10_21A	Propranolol	M	X	10.9922	L	L
CDH16005_20161107_PA10_21B	Propranolol	M		2.98631	R	R
CDH16005_20161107_PA10_21C	Propranolol	M		1.15359	L	L
CDH16008_20161102_PA10_19A	Propranolol	M	X	0.772921	R	R
CDH16010_20161104_PA10_01A	Propranolol	F		2.11177	L	R
CDH16010_20161104_PA10_01B	Propranolol	F	X	4.57792	L	R
CDH16010_20161104_PA10_01C	Propranolol	F		0.74867	R	L
CDH16010_20161104_PA10_05A	Propranolol	F		4.33731	R	R
CDH16010_20161104_PA10_05B	Propranolol	F		2.092	L	R
CDH16010_20161104_PA10_05C	Propranolol	F	X	4.63163	R	R
CDH16010_20161104_PA10_07A	Propranolol	F	X	5.50497	R	R
CDH16010_20161104_PA10_07B	Propranolol	F	X	1.95317	L	R
CDH16010_20161104_PA10_11A	Propranolol	F		9.08223	R	R
CDH16010_20161104_PA10_13A	Propranolol	F	X	3.87032	R	R
CDH16010_20161104_PA10_15A	Propranolol	F	X	6.87599	R	L
CDH16010_20161104_PA10_15B	Propranolol	F	X	3.23077	L	R
CDH16010_20161104_PA10_17A	Propranolol	F		8.3256	R	R
CDH16010_20161104_PA10_17B	Propranolol	F	X	3.60179	R	R
CDH16010_20161104_PA10_17C	Propranolol	F		2.95955	R	R
CDH16010_20161104_PA10_21A	Propranolol	F	X	2.37073	L
CDH16010_20161104_PA10_21B	Propranolol	F		8.3508	L	R
CDH16010_20161104_PA10_21C	Propranolol	F	X	5.57593	L	R
CDH16010_20161104_PA10_23A	Propranolol	F	X	3.15191	L	R
CDH16010_20161104_PA10_23B	Propranolol	F	X	11.6316	L	R
CDH16010_20161104_PA10_23C	Propranolol	F	X	3.88263	L	R
CDH16010_20161104_PA10_23D	Propranolol	F		3.30106	L	L
CDH16010_20161104_PA10_23E	Propranolol	F	X	3.13992	L	R
CDH16010_20161104_PA10_25A	Propranolol	F	X	4.37069	L	L
CDH16010_20161104_PA10_25B	Propranolol	F		3.4126	L	L
CDH16010_20161104_PA10_25C	Propranolol	F		4.54741	L	R
CDH16010_20161104_PA10_25D	Propranolol	F		3.00464	L	R
CDH16010_20161104_PA10_27A	Propranolol	F	X	8.82792	R	R
CDH16010_20161104_PA10_27B	Propranolol	F	X	9.72613	L	R
CDH16010_20161104_PA10_29A	Propranolol	F	X	5.49635	R	R
CDH16010_20161104_PA10_29B	Propranolol	F		1.97182	R	R
CDH16010_20161104_PA10_29C	Propranolol	F	X	1.96684	L	R
CDH16019_20161109_PA10_01A	Propranolol	M		5.83355	R	R
CDH16019_20161109_PA10_03A	Propranolol	M	X	3.31262	L	L
CDH16019_20161109_PA10_05A	Propranolol	M	X	11.1233	R	R
CDH16019_20161109_PA10_09A	Propranolol	M	X	1.78791	R	R
CDH16019_20161109_PA10_17A	Propranolol	M		3.30927	R	R
CDH16019_20161109_PA10_21A	Propranolol	M		0.569649	R	R
EMR17002_20170707_PA10_01A	Propranolol	F	X	2.54048	L	L
EMR17002_20170707_PA10_03A	Propranolol	F		1.28063	R	L
EMR17002_20170707_PA10_05A	Propranolol	F	X	4.77438	R	L
EMR17002_20170707_PA10_07A	Propranolol	F		12.5033	L	L
EMR17002_20170707_PA10_09A	Propranolol	F		1.93809	R	L
EMR17002_20170707_PA10_09B	Propranolol	F		2.4165	L	L
EMR17002_20170707_PA10_11A	Propranolol	F		6.42214	L	L
EMR17002_20170707_PA10_13A	Propranolol	F		1.00509	L	L
EMR17002_20170707_PA10_19A	Propranolol	F		1.7677	R	L
EMR17002_20170707_PA10_21A	Propranolol	F		0.367203	R	L
EMR17002_20170707_PA10_23A	Propranolol	F		3.87642	R	L
EMR17002_20170707_PA10_23B	Propranolol	F	X	1.06596	L	L
EMR17002_20170707_PA10_27A	Propranolol	F		0.281018		L
EMR17002_20170707_PA10_31A	Propranolol	F	X	0.74354	L	L
EMR17002_20170707_PA10_31B	Propranolol	F		0.724911	L
EMR17004_20170703_PA10_03A	Propranolol	F		0.769853		R
EMR17004_20170703_PA10_03B	Propranolol	F		2.15448	R	L
EMR17004_20170703_PA10_11A	Propranolol	F		0.75458	R	L
EMR17004_20170703_PA10_11B	Propranolol	F		4.04016	R	L
EMR17004_20170703_PA10_13A	Propranolol	F		1.56525	L	L
EMR17004_20170703_PA10_17A	Propranolol	F	X	2.0769	R	L
EMR17004_20170703_PA10_17B	Propranolol	F		1.26692	L	L
EMR17006_20170717_PA10_01A	Propranolol	M	X	0.309428	L	R
EMR17006_20170717_PA10_03A	Propranolol	M		1.96659	R	R
EMR17006_20170717_PA10_03B	Propranolol	M		1.20065	L	R
EMR17006_20170717_PA10_05A	Propranolol	M		3.00508	L	L
EMR17006_20170717_PA10_07A	Propranolol	M	X	0.380866	R	R
EMR17006_20170717_PA10_09A	Propranolol	M	X	2.20625	R	R
EMR17006_20170717_PA10_09B	Propranolol	M	X	0.744271	R	R
EMR17006_20170717_PA10_11A	Propranolol	M		0.607391	R	R
EMR17006_20170717_PA10_11B	Propranolol	M		3.99891	L	R
EMR17006_20170717_PA10_11C	Propranolol	M	X	3.43153	R	R
EMR17006_20170717_PA10_11D	Propranolol	M	X	5.47112	R	R
EMR17006_20170717_PA10_13A	Propranolol	M		1.87023		R
EMR17006_20170717_PA10_15A	Propranolol	M	X	15.1598	L	R
EMR17006_20170717_PA10_15B	Propranolol	M	X	4.80669	R	R
EMR17006_20170717_PA10_15C	Propranolol	M	X	9.89216	L	L
EMR17006_20170717_PA10_17A	Propranolol	M	X	1.88522	L	R
EMR17006_20170717_PA10_17B	Propranolol	M		0.536301	R	R
EMR17006_20170717_PA10_19A	Propranolol	M	X	5.77197	L	R
EMR17006_20170717_PA10_19B	Propranolol	M	X	0.526526	R	R
EMR17006_20170717_PA10_23A	Propranolol	M		12.6906	R	R
EMR17006_20170717_PA10_25A	Propranolol	M	X	0.913123	L	L
EMR17006_20170717_PA10_27A	Propranolol	M	X	11.297	L	L
EMR17006_20170717_PA10_27B	Propranolol	M		0.326838	R	R
EMR17007_20170622_PA10_01A	Propranolol	M	X	3.28714	R	R
EMR17007_20170622_PA10_03A	Propranolol	M	X	8.82296	L	L
EMR17007_20170622_PA10_03B	Propranolol	M	X	2.80888	R	L
EMR17007_20170622_PA10_05A	Propranolol	M		1.98237	L	L
EMR17007_20170622_PA10_05B	Propranolol	M		1.40607	R	L
EMR17007_20170622_PA10_07A	Propranolol	M		8.9926	R	R
EMR17007_20170622_PA10_09A	Propranolol	M	X	8.24082	L	R
EMR17007_20170622_PA10_09B	Propranolol	M	X	3.00995	R	R
EMR17007_20170622_PA10_11A	Propranolol	M		3.02297	L	R
EMR17007_20170622_PA10_11B	Propranolol	M	X	3.49043	R	R
EMR17007_20170622_PA10_17A	Propranolol	M		1.49399	L	L
EMR17007_20170622_PA10_17B	Propranolol	M		0.936734	R	R
EMR17007_20170622_PA10_23A	Propranolol	M	X	18.2653	L	R
EMR17007_20170622_PA10_23B	Propranolol	M	X	1.87015	R	R
EMR17007_20170622_PA10_27A	Propranolol	M	X	3.34362	L	L
EMR17007_20170622_PA10_27B	Propranolol	M	X	2.65935	R	R
EMR17007_20170622_PA10_27C	Propranolol	M	X	1.45026	R	R
EMR17008_20170718_PA10_01A	Propranolol	M		5.42702	L	R
EMR17008_20170718_PA10_03A	Propranolol	M	X	3.70469	L	R
EMR17008_20170718_PA10_05A	Propranolol	M		2.30901	R	R
EMR17008_20170718_PA10_05B	Propranolol	M	X	3.06718	L	R
EMR17008_20170718_PA10_09A	Propranolol	M	X	1.36231	R	R
EMR17008_20170718_PA10_09B	Propranolol	M	X	1.20735	L	R
EMR17008_20170718_PA10_11A	Propranolol	M		0.904468	R	R
EMR17008_20170718_PA10_11B	Propranolol	M		1.7701
EMR17008_20170718_PA10_11C	Propranolol	M	X	0.548542	R	R
EMR17008_20170718_PA10_17A	Propranolol	M		2.38562	R	R
EMR17008_20170718_PA10_17B	Propranolol	M		3.39797	L	R
EMR17008_20170718_PA10_19A	Propranolol	M	X	9.36878	R	R
EMR17008_20170718_PA10_19B	Propranolol	M	X	3.67514	R	R
EMR17008_20170718_PA10_21A	Propranolol	M	X	4.53866	L	R
EMR17008_20170718_PA10_21B	Propranolol	M	X	4.58025	L	R
EMR17008_20170718_PA10_21C	Propranolol	M		5.55535	R	R
EMR17008_20170718_PA10_21D	Propranolol	M		3.7637	L	R
EMR17008_20170718_PA10_21E	Propranolol	M		4.83152	R	R
EMR17008_20170718_PA10_23A	Propranolol	M	X	7.57495	L	L
EMR17008_20170718_PA10_23B	Propranolol	M	X	11.5949	L	R
EMR17008_20170718_PA10_23C	Propranolol	M	X	13.1503	L	R
EMR17008_20170718_PA10_23D	Propranolol	M	X	8.56007	L	R
EMR17008_20170718_PA10_29A	Propranolol	M	X	8.99964	L	R
EMR17008_20170718_PA10_29B	Propranolol	M		2.02397	R	R
EMR17008_20170718_PA10_31A	Propranolol	M	X	0.32199	R	R
