# Supplementary material for: Sex-dependent noradrenergic modulation of premotor cortex during decision-making
Source: eLife. 2023 Aug 22;12:e85590. doi: 10.7554/eLife.85590 (PMC10471161; doi:10.7554/eLife.85590)
Supplement: Figure 3—source data 1. [file elife-85590-fig3-data1.xlsx]

## Sheet: WellExit&LP histograms
	Fig 3B	Inset Histogram			Fig 3C	Inset Histogram			Fig 3D	Inset Histogram			Fig 3E	Inset Histogram
		Well Exit	Lever press			Well Exit	Lever press			Well Exit	Lever press			Well Exit	Lever press
		0.024	0.141025			0.00045	0.117025			0.033	0.567			0.033	0.123025
		0.028	0.145025			0.002475	0.176			0.045	0.606025			0.033325	0.195025
		0.029	0.155			0.004	0.193025			0.051	0.729			0.041225	0.223
		0.029175	0.203025			0.011	0.245			0.071	0.730025			0.058	0.302025
		0.04465	0.206			0.011	0.246025			0.0826	0.823025			0.058525	0.314
		0.0503	0.231			0.01605	0.247075			0.085	0.872			0.061	0.333025
		0.054	0.239			0.021	0.252025			0.08585	0.881025			0.066	0.399
		0.055225	0.309025			0.027	0.316			0.088	0.901			0.074	0.436
		0.058625	0.318025			0.02995	0.328			0.11	0.917025			0.082725	0.442025
		0.064	0.323025			0.037	0.345			0.146	0.964			0.082725	0.477
		0.06635	0.341025			0.038325	0.356			0.191	0.977025			0.083	0.487
		0.074675	0.344			0.04	0.357			0.194	1.019			0.1	0.488
		0.084	0.368025			0.044	0.375			0.213	1.03202			0.106	0.492
		0.093075	0.376025			0.046	0.383025			0.214	1.03202			0.11	0.496025
		0.094	0.382			0.051625	0.390025			0.226	1.047			0.11	0.497
		0.1033	0.383025			0.053	0.403			0.25465	1.04903			0.113	0.49735
		0.104025	0.388			0.057	0.411			0.257	1.08302			0.113	0.498
		0.111	0.394025			0.062	0.444025			0.285	1.085			0.151	0.517
		0.114	0.405025			0.066	0.449			0.304	1.09803			0.151	0.523025
		0.115	0.412025			0.066	0.456			0.321	1.13902			0.154	0.532
		0.115	0.426025			0.07	0.458			0.322	1.156			0.158	0.54
		0.118	0.427			0.075	0.460025			0.331	1.186			0.164025	0.542025
		0.122	0.427025			0.077	0.460025			0.366	1.19703			0.172	0.555025
		0.126025	0.464025			0.083	0.465025			0.374	1.21602			0.173	0.556
		0.128	0.468025			0.087	0.468			0.387	1.221			0.19	0.559025
		0.131025	0.469			0.093	0.505025			0.396	1.223			0.191025	0.568
		0.132975	0.472025			0.096	0.506			0.405	1.22402			0.195	0.573
		0.135	0.478			0.102	0.514			0.435	1.24002			0.196	0.586025
		0.13595	0.483025			0.102	0.515			0.438	1.25402			0.198	0.589025
		0.137	0.491			0.106	0.51605			0.448	1.268			0.199	0.596025
		0.139	0.511025			0.121	0.524			0.456025	1.27402			0.202	0.612
		0.145775	0.512025			0.121	0.525			0.463	1.29002			0.205	0.623
		0.147	0.532			0.131	0.537025			0.478	1.291			0.206	0.635
		0.151	0.535025			0.132	0.539			0.481	1.301			0.208	0.657025
		0.151	0.538025			0.133	0.545025			0.486	1.30703			0.223	0.662025
		0.151	0.547			0.133	0.56			0.496	1.31			0.225	0.668025
		0.152	0.555025			0.136	0.584			0.497	1.315			0.225	0.674025
		0.152	0.561025			0.139	0.584025			0.497525	1.32702			0.226	0.678025
		0.155	0.565			0.143	0.616			0.509	1.34403			0.227	0.679
		0.156	0.572			0.144	0.617			0.509	1.358			0.233	0.682
		0.157	0.585			0.145	0.622025			0.528	1.36502			0.233	0.683025
		0.158	0.587			0.148	0.63			0.529	1.36603			0.254	0.684
		0.16	0.587025			0.149	0.632025			0.562	1.39302			0.256	0.692
		0.162	0.588			0.15	0.635			0.564	1.39403			0.256	0.692025
		0.165	0.598025			0.151	0.637025			0.576	1.39702			0.258	0.696
		0.165025	0.612			0.152	0.638			0.585025	1.43203			0.261	0.699025
		0.167	0.612			0.152	0.638			0.6	1.48802			0.265	0.7
		0.169025	0.616			0.155	0.642			0.605	1.49002			0.265975	0.701
		0.174	0.622			0.156	0.647			0.619	1.49802			0.273	0.703
		0.175	0.623			0.158	0.651025			0.633	1.52503			0.295	0.708025
		0.175025	0.628			0.159	0.655			0.656	1.53			0.297	0.713025
		0.176	0.637			0.163	0.656			0.667	1.59003			0.2976	0.717
		0.1776	0.640025			0.164	0.662025			0.66765	1.61102			0.31	0.739025
		0.178	0.647025			0.164	0.665			0.674	1.61902			0.311	0.741025
		0.179	0.653025			0.164	0.667			0.679025	1.623			0.318	0.743
		0.182	0.653025			0.169	0.671025			0.686	1.64003			0.323	0.751025
		0.183	0.657			0.169	0.672			0.689	1.65603			0.328	0.755
		0.184	0.663			0.173	0.677025			0.703	1.70903			0.33	0.769025
		0.186	0.666025			0.173025	0.679			0.71	1.72202			0.336	0.772025
		0.18705	0.669025			0.174	0.683025			0.714	1.77402			0.341	0.774
		0.19	0.670025			0.17485	0.685			0.733025	1.79402			0.34365	0.778025
		0.192025	0.683025			0.178	0.689			0.738025	1.8			0.34535	0.788025
		0.193775	0.684			0.181	0.689025			0.751	1.80303			0.351	0.795
		0.1942	0.690025			0.182	0.689025			0.761	1.81503			0.354	0.799025
		0.195	0.691025			0.183	0.692025			0.767025	1.831			0.356	0.8
		0.197	0.692025			0.184	0.694			0.768	1.90003			0.362025	0.800025
		0.197225	0.693025			0.185	0.695			0.771025	1.90902			0.367	0.802
		0.197275	0.695025			0.185	0.702			0.788	1.91203			0.37	0.813
		0.199	0.697			0.188	0.703025			0.794	1.92803			0.371	0.817
		0.20185	0.697025			0.19	0.706			0.8341	1.94703			0.372	0.821025
		0.2046	0.702025			0.19	0.706025			0.836025	1.96503			0.374325	0.838025
		0.205	0.703			0.192	0.707025			0.911	1.99103			0.379525	0.841
		0.207	0.708025			0.193	0.710025			0.911	1.99903			0.382	0.848
		0.207275	0.709			0.195	0.711025			0.984	2.00303			0.384975	0.855025
		0.212025	0.711			0.197	0.713			0.988425	2.01202			0.386	0.86
		0.213	0.711025			0.197	0.713			1.004	2.04203			0.388	0.865025
		0.21375	0.712			0.198	0.714			1.02202	2.04303			0.389	0.871
		0.214025	0.717025			0.199	0.715			1.03802	2.05003			0.395	0.883025
		0.214025	0.717025			0.202	0.715			1.0438	2.05103			0.396	0.889025
		0.217	0.718025			0.204	0.715025			1.047	2.074			0.408	0.894
		0.217025	0.720025			0.205	0.718025			1.06	2.07802			0.42	0.895025
		0.218	0.720025			0.206	0.719			1.07702	2.08202			0.421	0.901
		0.219125	0.724025			0.207	0.721025			1.092	2.09302			0.42245	0.902025
		0.221875	0.728025			0.208	0.726025			1.095	2.15002			0.423025	0.904025
		0.222025	0.733025			0.209	0.729			1.14135	2.18202			0.424	0.904025
		0.223	0.734			0.209	0.730025			1.15403	2.18703			0.429	0.906025
		0.223875	0.741025			0.211	0.736025			1.1558	2.217			0.429925	0.908
		0.22425	0.744025			0.211	0.738			1.181	2.23203			0.433	0.913025
		0.225	0.744025			0.212	0.746025			1.193	2.23603			0.434	0.914
		0.225	0.745025			0.213	0.746025			1.23	2.29603			0.438	0.925025
		0.2272	0.754			0.218	0.752			1.2366	2.30602			0.447	0.933025
		0.228	0.754025			0.218	0.754025			1.241	2.31102			0.447	0.933025
		0.229	0.755025			0.218975	0.754025			1.263	2.35902			0.45	0.934
		0.231025	0.761025			0.22	0.762			1.27103	2.37303			0.45	0.936025
		0.232	0.762			0.225	0.765			1.28402	2.42103			0.453	0.938025
		0.232	0.768025			0.225	0.769			1.30123	2.42903			0.455	0.942025
		0.234	0.769			0.226	0.769			1.303	2.43403			0.455	0.947
		0.234	0.771025			0.229025	0.771			1.307	2.44203			0.46385	0.953025
		0.236	0.771025			0.231	0.772025			1.316	2.44402			0.467	0.958
		0.238	0.771025			0.232	0.782			1.322	2.455			0.473075	0.966025
		0.24	0.776025			0.232	0.785			1.336	2.47202			0.485	0.977025
		0.240275	0.780025			0.233	0.788			1.33603	2.52802			0.485	0.986
		0.241	0.782			0.233	0.789025			1.351	2.59503			0.485	0.997
		0.241	0.785025			0.238	0.791025			1.37302	2.621			0.488	1.01
		0.242	0.786025			0.239	0.791025			1.41	2.69303			0.491	1.02
		0.245	0.789025			0.239	0.796			1.44303	2.71303			0.491	1.02303
		0.245625	0.789025			0.239	0.796			1.45588	2.73005			0.499	1.02402
		0.24655	0.79			0.24	0.797			1.471	2.76103			0.499	1.028
		0.247	0.790025			0.242	0.799			1.47628	2.80202			0.4998	1.028
		0.248	0.792025			0.242	0.799			1.478	2.82603			0.505	1.02802
		0.248	0.792025			0.243	0.801			1.504	2.85303			0.508	1.034
		0.248025	0.795			0.243	0.801			1.50402	2.87403			0.51	1.038
		0.251775	0.796025			0.243	0.801			1.51002	2.88603			0.510975	1.042
		0.252	0.797025			0.244	0.802025			1.51208	2.89003			0.517	1.04303
		0.252	0.8			0.245	0.806			1.529	2.96203			0.524	1.04503
		0.253	0.800025			0.247	0.806025			1.536	2.98102			0.525025	1.046
		0.253	0.802025			0.247	0.807			1.53602	3.00703			0.528	1.05202
		0.254	0.803025			0.252	0.807025			1.557	3.06303			0.537	1.056
		0.255	0.804025			0.253	0.811025			1.59902	3.07503			0.537425	1.057
		0.255	0.805025			0.254	0.812025			1.602	3.13802			0.537725	1.067
		0.257025	0.808			0.254025	0.815025			1.60603	3.18502			0.537875	1.068
		0.259	0.811025			0.255	0.818025			1.65302	3.20503			0.54	1.072
		0.259	0.813025			0.255025	0.819			1.672	3.28605			0.540925	1.076
		0.25905	0.814025			0.256	0.822			1.69168	3.28803			0.5417	1.08702
		0.26	0.816			0.256	0.827025			1.773	3.30602			0.543	1.09102
		0.260025	0.823025			0.256	0.829025			1.873	3.31803			0.546	1.09502
		0.261	0.825025			0.257	0.830025			1.889	3.39205			0.554025	1.098
		0.261	0.827			0.258	0.831025			1.889	3.39502			0.558	1.10403
		0.262	0.827025			0.259	0.832025			1.8898	3.40702			0.561	1.10603
		0.264	0.83			0.26	0.838			1.946	3.41102			0.564	1.109
		0.264	0.831025			0.261	0.838			1.957	3.47903			0.565925	1.10902
		0.264025	0.831025			0.262	0.839025			1.983	3.50705			0.569975	1.11302
		0.264975	0.832025			0.262	0.840025			1.9985	3.51403			0.571	1.11803
		0.265	0.832025			0.263	0.841			2.048	3.54603			0.571625	1.12803
		0.265	0.835025			0.264	0.843			2.04802	3.59002			0.572	1.12902
		0.265	0.835025			0.264	0.843			2.05903	3.66405			0.574	1.138
		0.265	0.836025			0.265	0.844025			2.069	3.67402			0.58485	1.142
		0.270025	0.837025			0.265975	0.844025			2.09002	3.70003			0.589675	1.146
		0.271	0.837025			0.271	0.845025			2.134	3.70702			0.591025	1.14702
		0.272	0.841025			0.271	0.846025			2.17802	3.75303			0.596	1.15203
		0.27225	0.841025			0.272	0.847			2.18003	3.78903			0.598	1.15803
		0.273	0.843			0.274	0.847025			2.25502	3.88305			0.600925	1.16
		0.274	0.845025			0.275	0.848025			2.321	4.20402			0.607	1.16003
		0.274	0.845025			0.278	0.848025			2.33703	4.20705			0.609	1.16902
		0.277	0.846			0.278	0.849			2.385	4.22205			0.609	1.17203
		0.281025	0.849025			0.278975	0.849025			2.53103	4.28702			0.614	1.173
		0.282	0.852025			0.28	0.851			2.74702	4.33502			0.616875	1.17502
		0.282	0.854025			0.28	0.857			2.78803	4.40505			0.620025	1.179
		0.282025	0.854025			0.28	0.857025			2.80353	4.41505			0.62065	1.20002
		0.283	0.856			0.283	0.858			2.86203	4.42802			0.643	1.21002
		0.284	0.856025			0.285	0.859025			2.95403	4.49405			0.646	1.21103
		0.285	0.857025			0.285	0.861			2.97803	4.50305			0.649025	1.21103
		0.285125	0.858025			0.285025	0.862025			2.998	4.57905			0.649025	1.21202
		0.289	0.859025			0.286	0.864025			3.304	4.59403			0.65	1.216
		0.29	0.859025			0.287	0.864025			3.31245	4.60703			0.653075	1.21703
		0.29005	0.862			0.288	0.865			3.47503	4.61105			0.655	1.21703
		0.290125	0.863			0.288025	0.867			3.70003	4.62405			0.670825	1.219
		0.291	0.863025			0.289	0.87			3.71703	4.75103			0.677	1.23402
		0.292	0.870025			0.289	0.873025				4.78605			0.685	1.23903
		0.293	0.872			0.289	0.874				4.80502			0.688	1.25303
		0.295	0.874			0.29	0.876025				4.83103			0.695025	1.267
		0.296	0.876			0.291	0.878				4.84603			0.696125	1.28002
		0.29695	0.87605			0.292	0.878025							0.6969	1.283
		0.297	0.877025			0.292	0.879							0.698225	1.28802
		0.298025	0.878025			0.292	0.879025							0.698775	1.28903
		0.299025	0.880025			0.293	0.883							0.711	1.29103
		0.3	0.885			0.298	0.883025							0.711	1.292
		0.300375	0.885025			0.298	0.886							0.716075	1.30402
		0.300575	0.886			0.3	0.886							0.719025	1.314
		0.301	0.888			0.3	0.887							0.720025	1.31702
		0.3033	0.890025			0.302	0.888							0.725	1.319
		0.305	0.891025			0.306	0.892025							0.727275	1.32203
		0.306	0.891025			0.309	0.892025							0.730275	1.328
		0.307	0.894025			0.309	0.893							0.732	1.328
		0.309	0.906025			0.31	0.895							0.74	1.329
		0.31	0.907			0.31	0.895025							0.740025	1.33302
		0.313	0.907025			0.311	0.896							0.742525	1.34
		0.314	0.910025			0.311	0.896025							0.744	1.34
		0.314	0.911			0.312	0.897025							0.744025	1.34102
		0.314525	0.912025			0.313	0.899025							0.75	1.34102
		0.315	0.914025			0.314	0.900025							0.763025	1.35003
		0.316	0.915			0.315	0.901							0.764025	1.351
		0.3162	0.915025			0.316	0.904025							0.765825	1.352
		0.319025	0.927025			0.317	0.905025							0.775175	1.363
		0.319125	0.927025			0.317	0.906025							0.789425	1.36702
		0.321	0.928			0.317	0.906025							0.789725	1.38102
		0.321	0.928025			0.318	0.907025							0.796	1.413
		0.326	0.929			0.318	0.909							0.796125	1.43803
		0.326	0.93			0.32	0.909025							0.803025	1.43803
		0.326	0.930025			0.32	0.909025							0.815	1.44402
		0.326025	0.931			0.321	0.910025							0.8262	1.44703
		0.327	0.933			0.322	0.913025							0.829	1.45703
		0.328	0.933025			0.322	0.920025							0.834825	1.46402
		0.33	0.936			0.322	0.921025							0.845	1.47402
		0.33	0.936025			0.322025	0.925025							0.85305	1.47703
		0.33175	0.937025			0.323	0.927							0.855	1.48002
		0.333025	0.937025			0.324	0.928025							0.867	1.49402
		0.333025	0.938025			0.325	0.931							0.867025	1.49602
		0.334025	0.939			0.326	0.931025							0.86775	1.49903
		0.336275	0.941			0.33	0.933025							0.8788	1.506
		0.337	0.943			0.33	0.936							0.8883	1.51503
		0.339	0.944025			0.331	0.936							0.889	1.51703
		0.34	0.949025			0.332	0.938							0.892	1.52402
		0.341	0.95			0.332025	0.943							0.893	1.52802
		0.345025	0.951025			0.333	0.948025							0.900425	1.53503
		0.34525	0.953			0.334	0.951025							0.905775	1.53703
		0.346	0.956025			0.335	0.957							0.907	1.53802
		0.346025	0.957025			0.339	0.959							0.910475	1.544
		0.346275	0.962			0.344	0.96							0.913	1.54602
		0.348	0.962025			0.344	0.960025							0.914325	1.55602
		0.34865	0.969			0.345	0.962							0.922	1.557
		0.349	0.969025			0.347	0.962025							0.92335	1.55802
		0.350025	0.972			0.35	0.964							0.925	1.559
		0.351	0.972025			0.35	0.967025							0.925	1.57102
		0.351	0.973025			0.351	0.968							0.928	1.57203
		0.352	0.974			0.354	0.970025							0.94375	1.57702
		0.354025	0.975025			0.354	0.972025							0.945	1.583
		0.356025	0.976025			0.355	0.975025							0.951675	1.588
		0.35965	0.980025			0.356	0.975025							0.952	1.60203
		0.360025	0.980025			0.357	0.976							0.954	1.60403
		0.361	0.985			0.357	0.983025							0.962525	1.61403
		0.361	0.987			0.357	0.984025							0.963	1.615
		0.361025	0.989025			0.357025	0.985							0.966	1.617
		0.363	0.991025			0.366	0.985025							0.966	1.61803
		0.3641	0.994			0.367	0.986							0.971475	1.62003
		0.3646	0.994025			0.368	0.988025							0.973	1.62502
		0.366	0.994025			0.371	0.990025							0.987	1.627
		0.367	0.995025			0.373	0.991025							0.98895	1.62702
		0.369	0.998025			0.374	0.992025							0.995	1.64102
		0.370025	0.999025			0.378	0.995							0.9965	1.64502
		0.371	1.00303			0.379	0.995025							0.998425	1.65203
		0.372	1.00802			0.381	0.996							1.01485	1.665
		0.372575	1.01002			0.383	0.997							1.04503	1.66603
		0.373	1.011			0.385	0.997025							1.049	1.66702
		0.373025	1.01103			0.388	0.997025							1.06	1.66902
		0.376	1.012			0.392	0.998025							1.062	1.66902
		0.376	1.01202			0.395	1.00002							1.07385	1.68702
		0.3767	1.019			0.396	1.00202							1.08	1.70303
		0.377	1.01903			0.396	1.00703							1.089	1.70402
		0.378	1.02002			0.398	1.00903							1.093	1.71802
		0.378	1.024			0.399	1.011							1.09495	1.72602
		0.38	1.02402			0.399	1.01602							1.106	1.727
		0.38	1.028			0.402	1.01802							1.10855	1.73303
		0.38	1.03202			0.405	1.02002							1.11495	1.74103
		0.38	1.03402			0.405	1.02002							1.119	1.743
		0.382	1.03503			0.407	1.021							1.13	1.75503
		0.383	1.03703			0.409	1.02103							1.13	1.75602
		0.383025	1.038			0.41	1.02503							1.15	1.763
		0.384225	1.04002			0.412	1.03							1.15027	1.773
		0.386	1.04202			0.413	1.03103							1.1831	1.77602
		0.393025	1.04202			0.416	1.03303							1.19077	1.77802
		0.394025	1.04503			0.417	1.034							1.19322	1.78002
		0.395	1.048			0.417	1.03602							1.19732	1.786
		0.396	1.04802			0.419	1.03802							1.19903	1.79103
		0.396	1.049			0.419	1.03903							1.215	1.79503
		0.396	1.05202			0.419	1.04103							1.22685	1.79802
		0.397	1.05303			0.42	1.042							1.231	1.811
		0.398	1.056			0.420025	1.04202							1.26802	1.81303
		0.398025	1.057			0.421	1.04503							1.279	1.82603
		0.4	1.05703			0.422	1.04903							1.299	1.82603
		0.4001	1.058			0.423	1.05							1.31103	1.836
		0.403	1.05802			0.423	1.05002							1.3114	1.84003
		0.40355	1.05903			0.424	1.051							1.315	1.84203
		0.404025	1.06002			0.425	1.05303							1.319	1.84803
		0.405	1.061			0.425	1.05402							1.321	1.854
		0.409125	1.06202			0.426	1.05602							1.332	1.85502
		0.411	1.07102			0.427	1.05602							1.33902	1.86102
		0.412	1.072			0.428	1.05903							1.34912	1.866
		0.415	1.07603			0.429	1.067							1.35415	1.86603
		0.4156	1.079			0.431	1.067							1.401	1.873
		0.419325	1.08102			0.432	1.069							1.423	1.88403
		0.419425	1.08203			0.433	1.07803							1.43108	1.88603
		0.42	1.08502			0.433	1.07803							1.433	1.91603
		0.421025	1.08702			0.435	1.07803							1.441	1.91603
		0.423625	1.08902			0.437	1.079							1.44235	1.97503
		0.42445	1.091			0.44	1.07902							1.508	1.99303
		0.425	1.09302			0.44	1.08603							1.515	2.00002
		0.429	1.09403			0.441	1.09302							1.55783	2.00002
		0.43	1.10003			0.441	1.09603							1.6301	2.00402
		0.431025	1.10102			0.442	1.09702							1.65902	2.01103
		0.433	1.10203			0.442	1.09702							1.74503	2.017
		0.433	1.10203			0.445	1.09803							1.864	2.024
		0.433025	1.10502			0.446	1.09803							1.878	2.026
		0.438	1.10702			0.447	1.107							2.06595	2.037
		0.439025	1.10702			0.447	1.11							2.10067	2.03702
		0.43995	1.11003			0.45	1.11092							2.15103	2.05602
		0.441	1.11203			0.450975	1.11102							2.55193	2.06602
		0.443025	1.11203			0.452	1.11302							2.67315	2.07302
		0.444	1.11203			0.453	1.11302							2.99812	2.09503
		0.444	1.11502			0.453	1.11502								2.10403
		0.444025	1.12003			0.455	1.12102								2.152
		0.444025	1.12003			0.458	1.12102								2.16502
		0.445	1.12302			0.459	1.12302								2.19
		0.445025	1.129			0.459	1.12403								2.19402
		0.44505	1.13302			0.46	1.126								2.19402
		0.447	1.134			0.463	1.12803								2.20403
		0.447375	1.13502			0.463	1.12902								2.233
		0.451525	1.14			0.463	1.13102								2.23603
		0.454025	1.14203			0.464	1.13302								2.27502
		0.454925	1.143			0.465	1.13502								2.28903
		0.4552	1.144			0.466	1.13603								2.30202
		0.456	1.145			0.468	1.13702								2.30302
		0.45885	1.14502			0.472	1.139								2.35902
		0.459	1.14603			0.472	1.141								2.37303
		0.463025	1.14803			0.472	1.14203								2.38603
		0.465025	1.155			0.483	1.14403								2.39602
		0.4658	1.15603			0.484	1.14502								2.42402
		0.466	1.15803			0.485	1.14603								2.49702
		0.466	1.15902			0.486	1.14603								2.50002
		0.466825	1.16003			0.487	1.15								2.53602
		0.46855	1.16003			0.488	1.157								2.56803
		0.470125	1.16502			0.488	1.163								2.60502
		0.472025	1.16502			0.49	1.16403								2.62202
		0.473	1.16603			0.492	1.16403								2.62703
		0.474	1.169			0.493	1.16803								2.70503
		0.474	1.173			0.493	1.171								2.73102
		0.474	1.173			0.495	1.17102								2.75303
		0.47795	1.17502			0.496	1.17302								2.76403
		0.478	1.17502			0.5	1.17403								2.79502
		0.48	1.18			0.502	1.178								2.79905
		0.484	1.185			0.503	1.17803								2.82702
		0.485025	1.18603			0.504	1.18003								2.92603
		0.486	1.18603			0.505	1.18102								2.92702
		0.486	1.19003			0.507	1.18102								3.08902
		0.487	1.19303			0.510025	1.18102								3.22302
		0.487	1.198			0.511	1.18302								3.25303
		0.489025	1.20002			0.512	1.186								3.29502
		0.4898	1.20002			0.515	1.18603								3.39502
		0.489825	1.20002			0.519	1.18902								3.42503
		0.49	1.20402			0.52	1.19003								3.57302
		0.490075	1.20503			0.521	1.191								3.66403
		0.492175	1.20602			0.522	1.20002								3.80302
		0.493	1.20802			0.523	1.21202								3.81205
		0.497425	1.21002			0.524	1.213								3.84603
		0.498	1.21205			0.527	1.21303								3.93405
		0.5	1.21303			0.529	1.214								4.09405
		0.501875	1.21303			0.529	1.21703								4.26502
		0.504	1.21503			0.529	1.21802								4.34905
		0.504025	1.21703			0.531025	1.22								4.46403
		0.507475	1.21802			0.532	1.223								4.50405
		0.508	1.223			0.533	1.22303								4.53102
		0.508	1.225			0.533025	1.225								4.74603
		0.513175	1.23202			0.534	1.22602
		0.515125	1.23202			0.534025	1.234
		0.517375	1.236			0.535	1.234
		0.523	1.23602			0.535	1.23503
		0.525025	1.237			0.54	1.24002
		0.525975	1.24202			0.541	1.24103
		0.526375	1.24303			0.544	1.24903
		0.53025	1.24602			0.544	1.25202
		0.533	1.24903			0.544	1.25202
		0.5354	1.25103			0.546925	1.253
		0.536	1.253			0.547	1.25402
		0.537	1.25303			0.547	1.25703
		0.537	1.25402			0.55	1.26002
		0.537	1.255			0.555	1.26103
		0.5375	1.257			0.556	1.26103
		0.541025	1.25903			0.557	1.26202
		0.542	1.26002			0.559	1.26402
		0.543	1.263			0.56	1.26503
		0.543575	1.263			0.561025	1.26602
		0.544675	1.26503			0.562	1.267
		0.544875	1.267			0.564	1.268
		0.54795	1.27002			0.566	1.27303
		0.55	1.271			0.567	1.276
		0.550025	1.27202			0.567	1.27602
		0.553	1.27202			0.569	1.27903
		0.554725	1.27303			0.571	1.28
		0.555	1.27503			0.572	1.286
		0.556	1.27703			0.574	1.28703
		0.55655	1.28002			0.575	1.28903
		0.5583	1.283			0.576	1.29002
		0.559	1.28303			0.579	1.29703
		0.560025	1.291			0.584	1.29903
		0.56095	1.29103			0.592	1.30303
		0.561625	1.29503			0.593	1.30503
		0.563675	1.30303			0.594	1.30703
		0.566	1.30402			0.595	1.30802
		0.567	1.306			0.596	1.31
		0.569	1.31002			0.597	1.314
		0.571	1.311			0.597	1.31603
		0.578025	1.31202			0.597025	1.31803
		0.579575	1.31402			0.598	1.32102
		0.580875	1.31402			0.599	1.323
		0.582	1.31702			0.6	1.32302
		0.583	1.32203			0.603	1.32502
		0.5846	1.324			0.604	1.32603
		0.585	1.33203			0.607	1.33102
		0.588	1.334			0.609	1.33502
		0.588	1.33603			0.61	1.337
		0.589425	1.33702			0.611	1.33902
		0.590025	1.34003			0.614	1.34302
		0.591475	1.34003			0.616	1.34603
		0.592	1.34102			0.617	1.351
		0.594	1.34302			0.619	1.35702
		0.599925	1.347			0.62	1.365
		0.6011	1.34803			0.622	1.367
		0.602	1.35302			0.623	1.37
		0.607925	1.35702			0.624	1.371
		0.608	1.359			0.627	1.37102
		0.610625	1.36003			0.63	1.37403
		0.612025	1.36203			0.636	1.37403
		0.61275	1.36603			0.637	1.37403
		0.61385	1.36603			0.638	1.37902
		0.614025	1.36603			0.641	1.38102
		0.6165	1.37102			0.642	1.38902
		0.618	1.37203			0.645	1.38902
		0.619	1.37803			0.649	1.39102
		0.620725	1.379			0.65	1.392
		0.6294	1.37902			0.651	1.39502
		0.631025	1.38003			0.651	1.39803
		0.631325	1.38102			0.655	1.40102
		0.632	1.38803			0.656	1.402
		0.632875	1.39			0.658	1.408
		0.636025	1.39302			0.658	1.40902
		0.641675	1.39603			0.66	1.41003
		0.642025	1.39702			0.66	1.41403
		0.643	1.39702			0.663	1.42302
		0.64415	1.40803			0.669	1.42403
		0.64455	1.41003			0.67	1.427
		0.64475	1.41102			0.677	1.434
		0.651925	1.41203			0.683	1.43702
		0.652025	1.419			0.683025	1.44303
		0.65545	1.42603			0.686	1.45503
		0.6559	1.42902			0.686	1.46903
		0.65675	1.43203			0.686025	1.474
		0.659525	1.43403			0.688	1.474
		0.665025	1.43403			0.69	1.47503
		0.667025	1.446			0.694	1.47503
		0.670675	1.44602			0.698	1.48
		0.675025	1.451			0.699	1.48002
		0.678	1.456			0.702	1.50602
		0.67865	1.458			0.706	1.51402
		0.679825	1.46402			0.71	1.52002
		0.680425	1.46503			0.710025	1.522
		0.683025	1.46503			0.711025	1.52303
		0.685	1.46802			0.712	1.52303
		0.686725	1.46903			0.712	1.52503
		0.687025	1.47103			0.713	1.53103
		0.688025	1.47202			0.713	1.536
		0.689025	1.47202			0.715	1.54103
		0.689025	1.47503			0.717	1.54103
		0.697	1.47903			0.722	1.546
		0.703475	1.481			0.729025	1.55103
		0.704325	1.49202			0.734025	1.55103
		0.706675	1.49402			0.735	1.55602
		0.70885	1.49402			0.737	1.55802
		0.710025	1.51002			0.744025	1.559
		0.710025	1.51602			0.745	1.55903
		0.715	1.51602			0.747	1.563
		0.715775	1.51802			0.753	1.56603
		0.71655	1.51903			0.754	1.56902
		0.721025	1.52002			0.762	1.57003
		0.721025	1.52002			0.762	1.572
		0.7234	1.52503			0.764	1.574
		0.724575	1.529			0.766	1.57902
		0.7271	1.53503			0.767	1.58302
		0.728825	1.536			0.769	1.59203
		0.729025	1.54103			0.77	1.59902
		0.730025	1.54703			0.774	1.60203
		0.730025	1.54802			0.778	1.60302
		0.731025	1.54903			0.779025	1.605
		0.732975	1.55002			0.788025	1.61702
		0.735	1.55103			0.79	1.62102
		0.736225	1.553			0.792	1.623
		0.737	1.55503			0.792	1.62702
		0.7384	1.55602			0.803	1.63
		0.73975	1.559			0.808	1.63003
		0.741	1.56303			0.809	1.63702
		0.743025	1.56503			0.812	1.64302
		0.74325	1.56503			0.813	1.64302
		0.746	1.57102			0.813	1.64603
		0.749	1.58302			0.814	1.65702
		0.752	1.594			0.816	1.66203
		0.7588	1.59902			0.819	1.674
		0.758825	1.60102			0.819025	1.67702
		0.759375	1.61003			0.822	1.67803
		0.761	1.611			0.823	1.67803
		0.765	1.62003			0.843	1.68003
		0.766	1.62003			0.845	1.68203
		0.767	1.62502			0.855	1.69202
		0.769675	1.62702			0.859	1.718
		0.769825	1.63302			0.859	1.72103
		0.769975	1.634			0.877	1.73103
		0.77175	1.63403			0.888	1.732
		0.772475	1.64102			0.894	1.73402
		0.77295	1.64203			0.895	1.73703
		0.774525	1.64403			0.899	1.74202
		0.7751	1.651			0.9	1.74703
		0.7753	1.65603			0.908	1.75002
		0.777	1.65603			0.909	1.75802
		0.7775	1.65803			0.924	1.75903
		0.77945	1.66502			0.924025	1.76802
		0.781675	1.66502			0.928	1.76903
		0.78635	1.66603			0.928	1.78903
		0.789	1.67302			0.931	1.78903
		0.7891	1.67403			0.936	1.80103
		0.791525	1.675			0.942	1.815
		0.793025	1.67502			0.944	1.82302
		0.800575	1.67605			0.947	1.83003
		0.80625	1.68102			0.949	1.843
		0.8111	1.68502			0.952	1.85702
		0.815675	1.68702			0.958	1.86003
		0.818	1.69103			0.962	1.86203
		0.820025	1.69202			0.966025	1.88902
		0.827725	1.69303			0.969	1.892
		0.833	1.694			0.972	1.89203
		0.833775	1.69402			0.983	1.89603
		0.836	1.697			1.02	1.90102
		0.8378	1.69903			1.021	1.90502
		0.841025	1.704			1.03002	1.90603
		0.843275	1.709			1.039	1.92203
		0.847025	1.70903			1.041	1.93803
		0.848	1.71103			1.082	1.998
		0.849	1.71503			1.102	2.00002
		0.852	1.71703			1.115	2.00502
		0.856025	1.72002			1.119	2.02603
		0.857	1.72602			1.121	2.03503
		0.8592	1.73402			1.14603	2.03903
		0.8598	1.73903			1.154	2.04902
		0.863425	1.74303			1.25002	2.05503
		0.865	1.744			1.266	2.056
		0.865875	1.75103			1.282	2.058
		0.868025	1.754			1.28503	2.058
		0.869225	1.757			1.332	2.06402
		0.877925	1.76703			1.562	2.07002
		0.8867	1.76703			1.677	2.08703
		0.88775	1.76802			1.697	2.11603
		0.8916	1.79002			1.88	2.11903
		0.8989	1.79903			1.906	2.15903
		0.90265	1.80503			1.941	2.16502
		0.90635	1.80802			2.027	2.22903
		0.90785	1.80802			2.052	2.22903
		0.908375	1.81103			2.146	2.25002
		0.910575	1.81803			2.48203	2.271
		0.9148	1.82			2.597	2.29902
		0.916	1.832				2.34903
		0.91755	1.83203				2.35403
		0.919	1.83902				2.40103
		0.921	1.84203				2.46802
		0.922	1.84302				2.51
		0.923725	1.85302				2.55503
		0.924425	1.86102				2.60602
		0.92515	1.862				2.63203
		0.927	1.86502				2.63802
		0.930025	1.86603				2.67002
		0.932	1.86902				2.68102
		0.9323	1.86905				2.69102
		0.935975	1.87302				2.73002
		0.938	1.87502				2.78702
		0.942	1.87702				2.79102
		0.9433	1.88102				2.81803
		0.945025	1.88403				2.82603
		0.954025	1.89003				2.863
		0.955	1.89102				2.93003
		0.9591	1.89102				2.97702
		0.965	1.89403				3.00402
		0.966	1.89502				3.00402
		0.969275	1.896				3.10705
		0.974	1.89902				3.14202
		0.979025	1.90403				3.16703
		0.99195	1.90502				3.21703
		0.992	1.90502				3.26205
		0.994175	1.919				3.28602
		0.9957	1.921				3.29703
		0.996	1.92102				3.30505
		0.996025	1.92405				3.33902
		0.99685	1.93102				3.35502
		0.998025	1.93203				3.38903
		1.00303	1.934				3.50902
		1.01168	1.93902				3.52782
		1.01168	1.94003				3.54603
		1.0126	1.95005				3.55202
		1.01602	1.95103				3.59302
		1.0184	1.95303				3.60502
		1.01917	1.95402				3.93102
		1.02103	1.95605				4.05203
		1.023	1.96002				4.10503
		1.02303	1.99				4.11402
		1.02495	1.99002				4.14187
		1.02503	2.00005				4.16402
		1.02703	2.00402				4.21802
		1.028	2.00705				4.22502
		1.02862	2.00902				4.33603
		1.033	2.00902				4.34903
		1.03465	2.01302				4.36905
		1.035	2.01602				4.42502
		1.04035	2.01903				4.47103
		1.04215	2.01903				4.78902
		1.049	2.02002				4.82005
		1.05103	2.023				4.86505
		1.0529	2.03302
		1.05533	2.03705
		1.0582	2.04002
		1.0598	2.04102
		1.0599	2.04203
		1.06865	2.045
		1.07302	2.05103
		1.07733	2.05403
		1.0826	2.06203
		1.08302	2.06602
		1.08702	2.06705
		1.0922	2.07402
		1.09587	2.07603
		1.09902	2.079
		1.10003	2.085
		1.101	2.09103
		1.10203	2.09702
		1.10492	2.10403
		1.106	2.10502
		1.107	2.10803
		1.11203	2.11302
		1.11665	2.11405
		1.12	2.11405
		1.12403	2.12505
		1.13855	2.13105
		1.14805	2.13302
		1.166	2.138
		1.16702	2.141
		1.187	2.145
		1.19168	2.15405
		1.19202	2.16102
		1.19325	2.17105
		1.202	2.17603
		1.20922	2.18502
		1.20978	2.19203
		1.21103	2.19902
		1.21602	2.20202
		1.21725	2.21603
		1.22687	2.21902
		1.22703	2.23205
		1.22727	2.23603
		1.237	2.23802
		1.24602	2.23902
		1.2501	2.24003
		1.2603	2.24302
		1.26097	2.24302
		1.26347	2.246
		1.2694	2.25002
		1.2723	2.25502
		1.304	2.26003
		1.31032	2.26103
		1.31915	2.284
		1.31923	2.29703
		1.33403	2.30602
		1.338	2.31303
		1.343	2.32203
		1.346	2.33105
		1.36138	2.34002
		1.363	2.34103
		1.36603	2.34603
		1.36702	2.34802
		1.36947	2.36005
		1.3759	2.36605
		1.377	2.37202
		1.3786	2.37502
		1.379	2.37605
		1.382	2.37605
		1.39	2.382
		1.40305	2.39202
		1.423	2.39905
		1.42827	2.406
		1.45002	2.41403
		1.459	2.41502
		1.473	2.42302
		1.47503	2.42702
		1.49103	2.42802
		1.52093	2.43202
		1.54503	2.43602
		1.56702	2.43605
		1.585	2.44203
		1.592	2.44802
		1.59482	2.44902
		1.59533	2.45702
		1.59775	2.45903
		1.608	2.475
		1.623	2.47602
		1.63938	2.48402
		1.66102	2.49202
		1.66102	2.49702
		1.664	2.51005
		1.67302	2.517
		1.68	2.53405
		1.68203	2.53702
		1.69003	2.54805
		1.694	2.55302
		1.71833	2.55405
		1.73202	2.56102
		1.75198	2.56605
		1.77745	2.57603
		1.78107	2.58003
		1.82403	2.58102
		1.8559	2.58703
		1.8671	2.59002
		1.87003	2.59203
		1.87062	2.60105
		1.872	2.62005
		1.88203	2.64902
		1.88803	2.65903
		1.90328	2.66202
		1.94998	2.66902
		1.96168	2.69203
		1.97602	2.70103
		2.069	2.70103
		2.089	2.71802
		2.11115	2.73802
		2.11603	2.75502
		2.14502	2.75603
		2.15408	2.78302
		2.16635	2.79303
		2.208	2.79902
		2.20818	2.80803
		2.2831	2.81803
		2.2942	2.82203
		2.30702	2.82505
		2.32103	2.84503
		2.32903	2.85403
		2.34002	2.85602
		2.36503	2.87102
		2.398	2.87905
		2.49677	2.88402
		2.61603	2.89303
		2.617	2.89502
		2.6259	2.90305
		2.66712	2.91102
		2.7432	2.92402
		2.82673	2.93902
		2.85565	2.94802
		2.91003	2.95302
		2.91482	2.95903
		2.9151	2.97403
		3.00502	2.99003
		3.59958	2.99602
		3.64502	3.02002
			3.04603
			3.06002
			3.06402
			3.06502
			3.07702
			3.08205
			3.08703
			3.09002
			3.10403
			3.11002
			3.11402
			3.12003
			3.13503
			3.14602
			3.14905
			3.17903
			3.19005
			3.20702
			3.21102
			3.21703
			3.21703
			3.22702
			3.25002
			3.25905
			3.26205
			3.28005
			3.29105
			3.30405
			3.31002
			3.32305
			3.33102
			3.33803
			3.35105
			3.35403
			3.35805
			3.36503
			3.39102
			3.44105
			3.47302
			3.48505
			3.49205
			3.54002
			3.55305
			3.56305
			3.58805
			3.63903
			3.66805
			3.68205
			3.69402
			3.70005
			3.70702
			3.71605
			3.72103
			3.76503
			3.78003
			3.78702
			3.80103
			3.81905
			3.82402
			3.83202
			3.83803
			3.84002
			3.85403
			3.85703
			3.86105
			3.88903
			3.89303
			3.89803
			3.91205
			3.91405
			3.91502
			3.92802
			3.93102
			3.93905
			3.95403
			3.97202
			4.00903
			4.01705
			4.15205
			4.18002
			4.22605
			4.32705
			4.38603
			4.39802
			4.46205
			4.49305
			4.53405
			4.57305
			4.71405
			4.72203
			4.78202
			4.78805
			4.79105
			4.81405
			4.81503
			4.85302
			4.87705
			4.87805
			4.91205
			4.92905

## Sheet: PrefvNon Ttests
Fig 3B						Fig 3C						Fig 3D						Fig 3E
Paired t-test						Paired t-test						Paired t-test						Paired t-test
Holm-Šídák method						Holm-Šídák method						Holm-Šídák method						Holm-Šídák method
Time	P value	t ratio	df	Adjusted P Value		Time	P value	t ratio	df	Adjusted P Value		Time	P value	t ratio	df	Adjusted P Value		Time	P value	t ratio	df	Adjusted P Value
-1	0.391073	0.8633	67	0.988435		-1	0.162605	1.411	70	0.985864		-1	0.234831	1.216	26	0.993181		-1	0.479956	0.712	47	0.998875
-0.9	0.097401	1.681	67	0.857309		-0.9	0.642754	0.4659	70	0.99991		-0.9	0.191634	1.341	26	0.990724		-0.9	0.519283	0.6493	47	0.998875
-0.8	0.711299	0.3717	67	0.997502		-0.8	0.330118	0.9807	70	0.999667		-0.8	0.703918	0.3842	26	0.99994		-0.8	0.260296	1.139	47	0.995604
-0.7	0.631645	0.4816	67	0.997502		-0.7	0.415682	0.8188	70	0.999684		-0.7	0.031616	2.272	26	0.642294		-0.7	0.279001	1.095	47	0.996155
-0.6	0.168269	1.393	67	0.930254		-0.6	0.092081	1.708	70	0.918861		-0.6	0.889356	0.1405	26	0.99994		-0.6	0.775368	0.287	47	0.998875
-0.5	0.241815	1.181	67	0.972643		-0.5	0.358234	0.9248	70	0.999667		-0.5	0.815115	0.2362	26	0.99994		-0.5	0.858877	0.1788	47	0.998875
-0.4	0.061192	1.904	67	0.765973		-0.4	0.1688	1.39	70	0.985864		-0.4	0.655053	0.452	26	0.99994		-0.4	0.666163	0.4342	47	0.998875
-0.3	0.162661	1.412	67	0.930254		-0.3	0.103738	1.648	70	0.935305		-0.3	0.332803	0.9869	26	0.998458		-0.3	0.460596	0.744	47	0.998875
-0.2	0.282188	1.084	67	0.981288		-0.2	0.228756	1.214	70	0.996702		-0.2	0.714227	0.3702	26	0.99994		-0.2	0.306216	1.034	47	0.997119
-0.1	0.012735	2.56	67	0.274157		-0.1	0.845629	0.1954	70	0.99991		-0.1	0.094673	1.734	26	0.924674		-0.1	0.198817	1.303	47	0.990486
0	0.001587	3.293	67	0.043492		0	0.00603	2.832	70	0.160889		0	0.211426	1.281	26	0.993181		0	0.023159	2.348	47	0.481115
0.1	2e-06	5.184	67	7.8e-05		0.1	0.001237	3.367	70	0.037654		0.1	0.001464	3.558	26	0.056933		0.1	0.008064	2.767	47	0.228256
0.2	9e-06	4.817	67	0.000295		0.2	2e-06	5.133	70	9.3e-05		0.2	0.00219	3.399	26	0.081953		0.2	0.001692	3.331	47	0.054346
0.3	1.3e-05	4.708	67	0.000429		0.3	2e-06	5.252	70	6e-05		0.3	0.009637	2.794	26	0.307864		0.3	0.000465	3.763	47	0.017166
0.4	<0.000001	5.546	67	2e-05		0.4	<0.000001	5.372	70	3.9e-05		0.4	0.021563	2.445	26	0.523448		0.4	4e-06	5.197	47	0.000172
0.5	2.9e-05	4.491	67	0.000889		0.5	6e-06	4.897	70	0.000217		0.5	0.016504	2.563	26	0.441473		0.5	0.029988	2.238	47	0.560475
0.6	1.4e-05	4.689	67	0.000447		0.6	9e-06	4.78	70	0.000328		0.6	0.039548	2.167	26	0.713752		0.6	4.1e-05	4.526	47	0.001594
0.7	<0.000001	5.848	67	6e-06		0.7	3.1e-05	4.451	70	0.001039		0.7	0.015162	2.6	26	0.423055		0.7	0.019362	2.422	47	0.432774
0.8	<0.000001	5.617	67	1.5e-05		0.8	1.6e-05	4.64	70	0.000537		0.8	0.014345	2.624	26	0.41411		0.8	0.000968	3.521	47	0.03428
0.9	<0.000001	6.54	67	<0.000001		0.9	2e-06	5.133	70	9.3e-05		0.9	0.026274	2.356	26	0.584652		0.9	0.000456	3.77	47	0.017166
1	5e-06	4.99	67	0.000159		1	0.000285	3.821	70	0.009073		1	0.059816	1.968	26	0.822187		1	0.001443	3.386	47	0.049271
1.1	0.000161	4	67	0.004651		1.1	0.001475	3.31	70	0.043324		1.1	0.051672	2.04	26	0.785314		1.1	0.016038	2.498	47	0.384335
1.2	0.000137	4.047	67	0.004091		1.2	0.045731	2.034	70	0.730363		1.2	0.039554	2.167	26	0.713752		1.2	0.0552	1.966	47	0.771525
1.3	0.004186	2.965	67	0.103323		1.3	0.077291	1.793	70	0.886041		1.3	0.236333	1.212	26	0.993181		1.3	0.001578	3.355	47	0.05228
1.4	0.086666	1.739	67	0.850988		1.4	0.571351	0.5687	70	0.99991		1.4	0.212684	1.278	26	0.993181		1.4	0.010884	2.652	47	0.287703
1.5	0.003301	3.047	67	0.08541		1.5	0.52742	0.6351	70	0.999876		1.5	0.076898	1.842	26	0.884722		1.5	0.07137	1.845	47	0.842937
1.6	0.100809	1.664	67	0.857309		1.6	0.982238	0.02234	70	0.99991		1.6	0.369189	0.9139	26	0.998458		1.6	0.239543	1.191	47	0.994499
1.7	0.02347	2.319	67	0.434478		1.7	0.890774	0.1378	70	0.99991		1.7	0.625164	0.4944	26	0.99994		1.7	0.369421	0.9063	47	0.998749
1.8	0.122515	1.564	67	0.891589		1.8	0.676167	0.4195	70	0.99991		1.8	0.133815	1.548	26	0.963268		1.8	0.228775	1.219	47	0.994459
1.9	0.148823	1.461	67	0.924086		1.9	0.777004	0.2843	70	0.99991		1.9	0.224337	1.245	26	0.993181		1.9	0.089576	1.733	47	0.89484
2	0.328568	0.9842	67	0.987497		2	0.45372	0.7534	70	0.999684		2	0.113889	1.636	26	0.947302		2	0.187093	1.339	47	0.989507
2.1	0.065372	1.873	67	0.774029		2.1	0.802125	0.2516	70	0.99991		2.1	0.569077	0.5767	26	0.99994		2.1	0.422137	0.8098	47	0.998785
2.2	0.09091	1.715	67	0.851358		2.2	0.939068	0.07672	70	0.99991		2.2	0.111061	1.65	26	0.947302		2.2	0.808865	0.2433	47	0.998875
2.3	0.824017	0.2233	67	0.997502		2.3	0.617407	0.5018	70	0.99991		2.3	0.855274	0.1842	26	0.99994		2.3	0.567471	0.5758	47	0.998875
2.4	0.806199	0.2463	67	0.997502		2.4	0.591354	0.5394	70	0.99991		2.4	0.577493	0.5641	26	0.99994		2.4	0.177327	1.37	47	0.988774
2.5	0.63433	0.4778	67	0.997502		2.5	0.259827	1.136	70	0.998197		2.5	0.554909	0.5982	26	0.99994		2.5	0.58827	0.5451	47	0.998875
2.6	0.365297	0.9115	67	0.988435		2.6	0.329974	0.981	70	0.999667		2.6	0.688622	0.4052	26	0.99994		2.6	0.686855	0.4056	47	0.998875
2.7	0.359803	0.9221	67	0.988435		2.7	0.367515	0.907	70	0.999667		2.7	0.347442	0.9569	26	0.998458		2.7	0.513356	0.6586	47	0.998875
2.8	0.753287	0.3156	67	0.997502		2.8	0.418053	0.8146	70	0.999684		2.8	0.374412	0.9038	26	0.998458		2.8	0.359563	0.9252	47	0.998749
2.9	0.554262	0.5944	67	0.996504		2.9	0.359629	0.9221	70	0.999667		2.9	0.835627	0.2096	26	0.99994		2.9	0.403322	0.8433	47	0.998785

## Sheet: Saline Cue Left
ID	sex	SidePref	CUE	ZSCORE -1	-0.9	-0.8	-0.7	-0.6	-0.5	-0.4	-0.3	-0.2	-0.1	0	0.1	0.2	0.3	0.4	0.5	0.6	0.7	0.8	0.9	1	1.1	1.2	1.3	1.4	1.5	1.6	1.7	1.8	1.9	2	2.1	2.2	2.3	2.4	2.5	2.6	2.7	2.8	2.9
CDH16002_20161017_S_01A	F	X	L	-0.0455848	-0.00811262	-0.270418	-0.158002	-0.251682	-0.064321	-0.176738	-0.195474	-0.0830571	-0.270418	-0.30789	-0.326627	-0.251682	-0.420307	-0.289154	-0.364099	-0.176738	-0.382835	-0.251682	-0.364099	-0.232946	-0.382835	-0.364099	-0.289154	-0.195474	-0.420307	-0.345363	-0.420307	-0.364099	-0.270418	-0.289154	-0.21421	-0.21421	-0.176738	-0.326627	-0.251682	-0.120529	-0.139265	-0.101793	-0.00811262
CDH16002_20161017_S_17A	F		R	0.29484	-0.0832363	0.0112827	-0.0359768	0.0585422	-0.0832363	-0.225015	0.105802	0.0585422	0.153061	-0.0359768	-0.0832363	-0.0832363	-0.272274	0.0112827	-0.130496	0.105802	0.200321	0.0585422	0.200321	-0.0359768	-0.0832363	-0.130496	-0.0359768	0.105802	0.105802	-0.0359768	-0.0359768	-0.225015	0.0585422	-0.225015	-0.225015	-0.0832363	-0.130496	0.0585422	-0.0832363	-0.177755	0.0112827	0.0585422	-0.0359768
CDH16002_20161017_S_19A	F		L	-0.43229	-0.327475	-0.477211	-0.537106	-0.342448	-0.327475	-0.387369	-0.252606	-0.312501	-0.192712	-0.222659	-0.117844	-0.162764	-0.132817	-0.117844	-0.222659	-0.282554	-0.222659	-0.237633	-0.147791	-0.252606	-0.117844	-0.0429753	0.241524	0.391261	0.645813	0.466129	0.765602	0.615865	0.466129	0.645813	0.585918	0.930312	0.750628	0.900365	0.570944	0.960259	0.765602	0.765602	0.720681
CDH16003_20161018_S_17A	F	X	R	0.12104	0.159497	0.159497	0.140269	0.159497	0.178726	0.12104	-0.03279	0.0441249	-0.263535	-0.128934	-0.0520188	-0.03279	-0.148163	-0.205849	-0.03279	-0.148163	-0.244306	-0.148163	-0.167391	-0.0520188	-0.03279	-0.109705	-0.109705	-0.148163	-0.282764	-0.167391	-0.263535	-0.301993	-0.263535	-0.282764	-0.0712475	-0.0712475	-0.0904763	-0.244306	-0.109705	-0.0520188	-0.128934	-0.109705	0.0248962
CDH16005_20161021_S_05A	M	X	L	-0.131916	-0.000496187	-0.197625	-0.0662059	0.393762	-0.0662059	0.196633	0.262343	0.328053	0.196633	0.525182	0.590891	0.262343	0.459472	0.525182	0.262343	0.393762	0.525182	0.0652136	0.328053	0.196633	-0.0662059	0.130923	0.0652136	0.130923	-0.000496187	0.262343	-0.0662059	0.196633	-0.000496187	-0.197625	-0.263335	0.0652136	-0.263335	-0.197625	-0.329045	-0.0662059	-0.197625	-0.263335	-0.131916
CDH16005_20161021_S_07A	M		L	-0.259359	-0.0486569	0.119905	-0.132938	-0.0907973	-0.0907973	-0.175078	-0.0486569	-0.132938	0.119905	0.0777642	-0.0486569	-0.0486569	0.0356238	-0.0907973	0.204185	-0.00651655	0.0777642	0.204185	0.204185	0.0777642	-0.0907973	-0.00651655	-0.00651655	0.0356238	-0.00651655	0.414887	-0.00651655	0.204185	-0.132938	0.162045	-0.00651655	-0.0486569	0.0777642	0.0356238	0.0356238	0.372747	-0.0907973	0.0356238	-0.00651655
CDH16005_20161021_S_07B	M	X	L	-0.172869	-0.0201467	-0.0637817	-0.0201467	0.198028	0.00167085	-0.107417	0.198028	-0.0419642	-0.0637817	0.0234884	-0.0637817	-0.0419642	0.307116	0.198028	-0.0201467	0.132576	0.110758	-0.0201467	0.00167085	0.154393	0.372569	0.285298	0.438021	-0.0201467	-0.129234	0.285298	0.328933	0.0889409	0.307116	0.307116	0.350751	0.481656	0.154393	0.241663	0.372569	0.110758	0.263481	0.263481	0.198028
CDH16005_20161021_S_07C	M	X	R	0.0944274	-0.0145718	0.312426	-0.0145718	-0.0872379	-0.0872379	-0.0509048	-0.0872379	0.0944274	0.13076	0.0944274	-0.0509048	0.0217613	-0.0509048	-0.0509048	0.0217613	-0.123571	-0.196237	-0.0872379	-0.159904	-0.123571	0.0580943	-0.305236	-0.0872379	-0.268903	-0.0872379	-0.0509048	-0.23257	-0.196237	-0.305236	-0.196237	-0.341569	-0.23257	-0.305236	-0.23257	0.167094	-0.159904	-0.23257	-0.0145718	-0.268903
CDH16005_20161021_S_07D	M		L	-0.470771	-0.38019	-0.199029	-0.168836	-0.259416	-0.349997	-0.229223	-0.078255	0.1331	0.344454	-0.199029	-0.138642	-0.28961	-0.108449	-0.349997	-0.259416	-0.28961	-0.531158	-0.349997	-0.410384	-0.500964	-0.440577	-0.410384	-0.561351	-0.531158	-0.410384	-0.38019	-0.28961	-0.319803	-0.28961	-0.259416	-0.349997	-0.229223	-0.078255	-0.138642	-0.138642	-0.138642	0.0123255	0.042519	-0.017868
CDH16005_20161021_S_09A	M		R	-0.000889654	0.0427034	-0.000889654	-0.262448	-0.0880757	0.173483	-0.0880757	-0.131669	0.217076	0.0427034	0.260669	-0.262448	-0.175262	0.0862964	-0.131669	-0.0444827	-0.131669	-0.262448	-0.000889654	-0.000889654	0.129889	-0.131669	0.129889	-0.175262	0.129889	0.347855	0.347855	0.217076	-0.000889654	0.0427034	0.260669	-0.131669	-0.175262	-0.0444827	-0.0444827	-0.0880757	-0.131669	-0.000889654	0.129889	-0.175262
CDH16005_20161021_S_09B	M		R	0.236438	0.295607	0.118101	-0.000235522	0.118101	-0.118572	-0.177741	0.118101	-0.000235522	-0.177741	-0.118572	-0.059404	-0.236909	0.058933	0.17727	-0.059404	0.118101	-0.236909	-0.000235522	-0.118572	-0.059404	0.118101	0.058933	-0.118572	0.236438	0.236438	0.17727	-0.118572	0.058933	-0.000235522	0.058933	-0.118572	-0.118572	0.236438	-0.118572	-0.000235522	-0.118572	0.118101	0.058933	0.236438
CDH16005_20161021_S_09C	M	X	R	0.100018	-0.183381	0.00555171	0.194484	0.0527848	-0.136147	0.00555171	-0.0416814	0.00555171	-0.136147	0.00555171	-0.230614	0.00555171	0.0527848	-0.277847	-0.230614	-0.32508	-0.136147	-0.230614	-0.136147	-0.0889144	-0.0889144	-0.230614	-0.277847	-0.0889144	0.00555171	-0.0889144	-0.0416814	-0.136147	-0.136147	0.00555171	-0.136147	-0.0889144	-0.136147	0.147251	-0.0416814	0.0527848	0.00555171	-0.0889144	-0.0889144
CDH16005_20161021_S_09D	M		L	0.0237403	-0.132654	-0.184785	-0.236917	-0.236917	-0.184785	-0.0283911	-0.132654	-0.184785	-0.184785	-0.184785	-0.0283911	-0.0805225	-0.0283911	-0.132654	-0.236917	-0.289048	-0.289048	-0.132654	-0.0805225	-0.0805225	-0.236917	-0.0805225	-0.0283911	-0.0805225	0.0237403	-0.184785	-0.132654	-0.289048	-0.289048	-0.236917	-0.236917	-0.236917	-0.184785	-0.289048	-0.236917	-0.289048	-0.184785	-0.289048	-0.236917
CDH16005_20161021_S_09E	M		L	0.0136759	0.228201	0.0136759	-0.272358	0.29971	-0.200849	-0.200849	0.156693	-0.129341	0.0851843	-0.0578325	0.0136759	0.371218	0.442726	0.156693	-0.0578325	0.29971	0.228201	0.0136759	0.29971	0.228201	0.156693	0.514235	0.800268	0.871777	1.0863	1.0863	0.943285	0.585743	0.800268	0.442726	0.585743	0.156693	0.371218	0.29971	0.228201	-0.200849	-0.200849	0.228201	-0.129341
CDH16005_20161021_S_13A	M		R	0.330562	0.603192	0.512316	0.625912	0.39872	0.875823	0.535035	0.512316	0.239685	0.94398	0.898542	0.285123	0.239685	0.0352123	-0.169261	-0.328295	-0.282857	-0.532768	-0.510049	-0.305576	-0.373733	-0.487329	-0.19198	0.0352123	0.148808	0.216966	0.262404	0.330562	0.330562	0.39872	0.625912	0.694069	0.307843	0.535035	0.148808	0.10337	0.148808	0.603192	0.0579315	0.262404
CDH16005_20161021_S_15A	M	X	L	-0.290507	-0.53499	-0.453495	-0.494243	-0.494243	-0.372001	-0.290507	-0.433122	-0.473869	-0.147892	-0.331254	-0.229386	0.0762171	0.218832	0.259579	0.198458	0.422568	0.259579	0.3207	0.0965906	-0.188639	0.239206	0.0354699	-0.0460243	-0.00527717	-0.188639	-0.351628	-0.0460243	-0.188639	-0.127519	-0.290507	-0.392375	-0.555363	-0.392375	-0.351628	-0.290507	-0.331254	-0.514616	-0.616484	-0.270133
CDH16005_20161021_S_15B	M	X	L	0.105513	0.0104909	0.343067	0.295556	0.0104909	0.200534	0.343067	0.343067	0.295556	0.4856	0.248045	0.153024	0.248045	0.438089	0.4856	0.390578	0.200534	0.0580018	0.105513	0.153024	0.153024	-0.03702	-0.227063	-0.179553	0.0104909	-0.227063	-0.132042	-0.132042	0.0580018	-0.179553	0.0104909	0.295556	0.153024	0.0104909	0.153024	0.0580018	0.295556	0.200534	-0.03702	-0.132042
CDH16005_20161021_S_15C	M	X	R	-0.0105005	-0.178895	-0.263093	0.0736969	-0.375356	-0.0385664	-0.263093	-0.178895	-0.0385664	-0.122764	-0.094698	-0.319225	-0.094698	-0.291159	-0.206961	-0.235027	-0.15083	0.101763	0.0175653	0.129829	0.270158	0.101763	-0.0385664	-0.0105005	-0.206961	0.157894	0.0175653	-0.319225	-0.431488	0.0456311	-0.375356	-0.122764	-0.291159	-0.431488	-0.431488	-0.319225	-0.263093	-0.543751	-0.235027	-0.34729
CDH16005_20161021_S_17A	M	X	R	0.307802	-0.0482829	0.129759	0.070412	0.070412	-0.285673	-0.226325	-0.34502	-0.166978	0.0110645	-0.226325	-0.10763	-0.10763	-0.226325	-0.166978	-0.10763	0.129759	0.307802	0.129759	-0.0482829	0.426497	0.129759	0.367149	0.367149	0.248454	0.782581	0.0110645	0.426497	0.129759	0.248454	0.189107	0.307802	-0.226325	0.070412	-0.0482829	0.189107	-0.166978	-0.166978	-0.226325	-0.0482829
CDH16005_20161021_S_17B	M		R	-0.0639901	-0.0108294	0.201813	-0.117151	0.0954919	-0.170311	0.201813	0.254974	-0.117151	0.201813	0.254974	-0.276633	-0.0108294	-0.0639901	-0.223472	0.0954919	-0.117151	-0.170311	-0.117151	-0.0639901	0.0954919	-0.0108294	-0.0108294	-0.0108294	0.201813	0.414456	0.361295	0.573938	0.627098	0.308134	-0.223472	-0.170311	0.0423312	0.254974	-0.0639901	0.148653	0.0423312	-0.276633	-0.0639901	-0.117151
CDH16005_20161021_S_17C	M	X	L	0.199153	0.0587152	0.550249	0.199153	0.409811	0.199153	0.128934	-0.151942	0.199153	0.409811	0.0587152	-0.151942	0.199153	-0.151942	0.831125	1.112	0.620468	0.409811	0.269373	0.199153	-0.0817231	0.0587152	-0.151942	-0.011504	-0.011504	-0.151942	-0.222161	0.128934	-0.0817231	-0.011504	0.199153	-0.0817231	-0.222161	-0.0817231	-0.222161	-0.222161	-0.222161	-0.151942	-0.222161	-0.222161
CDH16005_20161021_S_17D	M		R	-0.0131723	0.0554957	0.0554957	0.0554957	-0.150508	-0.0818404	-0.0131723	-0.0818404	-0.0131723	0.2615	-0.0818404	-0.0818404	-0.0818404	-0.0818404	-0.0131723	-0.219176	-0.287845	-0.287845	-0.219176	-0.0818404	-0.0818404	-0.0818404	-0.150508	-0.0131723	0.330168	0.879512	0.2615	0.398836	0.124164	0.398836	0.2615	0.2615	-0.150508	0.192832	0.124164	-0.219176	0.0554957	-0.0818404	0.124164	0.192832
CDH16005_20161021_S_17E	M		L	-0.170426	-0.0565696	0.057287	0.171144	0.114215	0.057287	0.398857	0.057287	0.114215	0.285	-0.170426	0.285	0.114215	0.114215	-0.0565696	-0.0565696	-0.0565696	-0.170426	0.398857	0.398857	-0.170426	0.171144	0.285	0.171144	0.114215	0.171144	0.228072	0.455785	0.285	0.000358673	-0.0565696	-0.113498	0.000358673	0.057287	-0.0565696	-0.0565696	-0.227354	-0.0565696	-0.0565696	-0.0565696
CDH16005_20161021_S_17F	M	X	R	0.122732	0.122732	-0.156518	-0.156518	-0.0168933	-0.156518	-0.156518	-0.156518	-0.156518	0.262357	-0.156518	-0.156518	-0.0168933	-0.156518	-0.156518	-0.156518	0.262357	0.262357	0.122732	-0.156518	0.262357	0.262357	-0.0168933	0.262357	0.262357	0.122732	-0.156518	0.122732	-0.0168933	-0.0168933	0.122732	-0.156518	-0.156518	-0.156518	-0.156518	-0.156518	-0.156518	-0.156518	-0.0168933	-0.156518
CDH16005_20161021_S_21A	M	X	R	-0.116049	-0.0629178	-0.0629178	-0.142615	-0.275442	-0.142615	-0.434836	-0.381705	-0.16918	-0.116049	-0.00978665	0.0433445	0.202738	-0.0629178	0.0433445	-0.0894834	-0.195746	-0.00978665	-0.434836	-0.195746	-0.142615	0.123041	0.0964756	0.0964756	-0.00978665	-0.0363522	0.0699101	-0.40827	-0.222311	-0.0363522	-0.142615	0.149607	-0.222311	-0.0363522	-0.0629178	-0.116049	0.0699101	0.0699101	-0.0629178	0.123041
CDH16005_20161021_S_21B	M	X	R	0.0304515	0.0304515	-0.0721757	-0.174803	-0.0978325	0.466617	0.00479471	0.107422	0.184392	0.36399	-0.0721757	0.389647	0.697528	0.723185	0.466617	0.492274	0.28702	0.261363	0.158736	-0.149146	0.312676	0.184392	0.594901	0.184392	-0.0208621	-0.123489	-0.0465189	0.00479471	0.00479471	0.00479471	0.107422	-0.0208621	-0.303087	0.00479471	0.0817651	-0.226116	-0.174803	-0.0208621	0.107422	-0.123489
CDH16005_20161021_S_21C	M		R	-0.0115689	0.0972798	0.206129	-0.229266	-0.0659932	-0.120418	-0.0115689	-0.174842	-0.120418	-0.120418	-0.0659932	-0.120418	-0.0659932	-0.0115689	-0.0659932	0.369402	-0.0659932	0.260553	0.260553	0.206129	0.151704	0.206129	0.151704	0.260553	0.0428555	0.0972798	0.0972798	0.0428555	-0.120418	0.0428555	-0.0659932	-0.0659932	-0.120418	-0.174842	-0.120418	-0.174842	-0.0659932	-0.174842	-0.120418	-0.174842
CDH16005_20161021_S_21D	M		L	0.163568	0.0195236	0.163568	0.163568	-0.0765056	-0.22055	-0.0765056	-0.12452	-0.22055	0.0195236	-0.316579	0.0195236	0.0675383	0.403641	0.0195236	0.163568	0.259597	-0.028491	-0.22055	0.0195236	0.0675383	0.259597	-0.0765056	-0.0765056	-0.028491	-0.172535	-0.028491	-0.22055	-0.12452	-0.22055	0.0195236	-0.12452	-0.22055	-0.0765056	-0.172535	-0.028491	-0.22055	-0.028491	-0.268564	-0.12452
CDH16005_20161021_S_25A	M	X	R	-0.171343	-0.11051	0.163239	0.0415728	0.102406	0.163239	-0.171343	0.0111563	-0.0800934	0.0719894	0.0719894	0.163239	0.193656	0.132822	0.254489	0.193656	0.132822	0.0111563	0.0415728	-0.0192603	0.0111563	-0.0192603	-0.140926	-0.11051	0.102406	-0.262593	-0.0496768	-0.0496768	-0.20176	-0.171343	0.0415728	-0.140926	-0.353842	-0.323426	-0.384259	-0.20176	-0.262593	-0.293009	-0.171343	-0.293009
CDH16005_20161021_S_25B	M		L	-0.286823	-0.363632	-0.34443	-0.517249	-0.651664	-0.61326	-0.61326	-0.61326	-0.594058	-0.594058	-0.574856	-0.478845	-0.363632	-0.286823	0.0972203	0.289242	0.212433	0.53887	0.308444	0.442859	0.154827	0.193231	0.0972203	0.0588159	-0.190812	-0.402036	-0.459643	-0.670867	-0.670867	-0.728473	-0.728473	-0.824484	-0.690069	-0.670867	-0.690069	-0.747675	-0.632462	-0.61326	-0.594058	-0.440441
CDH16005_20161021_S_25C	M		L	0.225796	0.0548653	0.0548653	-0.116066	-0.262578	-0.286997	-0.213741	-0.116066	0.079284	-0.116066	-0.213741	-0.0183909	-0.0183909	0.34789	0.714171	0.860683	1.22696	1.05603	1.54441	1.30022	1.47115	1.25138	1.20255	0.445565	0.763009	0.592077	0.34789	0.103703	0.00602782	-0.213741	-0.457928	-0.213741	-0.457928	-0.286997	-0.335834	-0.311416	-0.311416	-0.360253	-0.189322	-0.335834
CDH16005_20161021_S_25D	M		R	-0.122941	-0.103397	-0.396561	-0.122941	-0.0838528	-0.0838528	-0.16203	0.0920453	0.0334126	-0.142486	-0.220662	-0.103397	-0.279295	-0.220662	-0.377016	-0.396561	-0.455193	-0.474737	-0.435649	-0.513826	-0.337928	-0.396561	-0.357472	-0.318384	-0.53337	-0.377016	-0.396561	-0.337928	-0.337928	-0.259751	-0.455193	-0.201118	-0.259751	-0.279295	-0.201118	-0.435649	-0.220662	-0.279295	-0.318384	-0.181574
CDH16005_20161021_S_25E	M		R	0.233726	-0.0246185	0.104554	-0.0676758	0.104554	-0.0246185	0.405955	-0.196848	0.0184389	0.362898	0.449012	0.104554	0.362898	0.362898	0.276783	0.31984	0.362898	0.49207	0.793471	0.405955	0.362898	0.276783	0.362898	0.449012	-0.153791	0.147611	-0.110733	0.233726	0.104554	-0.110733	-0.110733	-0.32602	-0.153791	-0.196848	-0.282963	-0.0676758	-0.153791	-0.239905	-0.196848	-0.0246185
CDH16005_20161021_S_31A	M	X	L	-0.216167	-0.109257	-0.0736206	-0.00234767	0.318381	-0.251803	0.318381	0.389654	0.460927	0.104562	0.140198	0.104562	0.5322	0.282744	0.496563	0.282744	0.247108	0.247108	0.104562	-0.0379842	0.211471	0.175835	-0.0736206	-0.144894	0.140198	0.104562	-0.00234767	-0.144894	0.0332888	-0.216167	0.104562	0.389654	0.175835	-0.28744	-0.109257	0.140198	0.247108	0.104562	-0.0379842	-0.00234767
CDH16008_20161019_S_09A	M		L	0.27233	-0.0547711	-0.194957	0.0386864	0.178873	-0.194957	-0.00804234	-0.1015	0.365787	0.459245	0.786346	0.412516	0.459245	0.0854151	-0.00804234	-0.00804234	-0.1015	-0.00804234	-0.1015	-0.00804234	-0.0547711	-0.1015	-0.0547711	-0.194957	0.132144	-0.00804234	0.132144	0.0386864	-0.00804234	-0.148229	0.132144	-0.1015	0.225601	0.225601	-0.148229	-0.0547711	-0.0547711	-0.194957	-0.1015	-0.241686
CDH16008_20161019_S_23A	M		R	0.51053	0.396844	0.169473	0.169473	0.245263	0.0557872	-0.171584	-0.171584	0.017892	-0.0578985	-0.0578985	0.131578	-0.0957937	0.245263	-0.0957937	0.017892	-0.0957937	0.017892	-0.209479	-0.0957937	-0.133689	-0.0578985	0.017892	-0.0578985	-0.0957937	0.321054	-0.0578985	0.0936824	0.245263	0.245263	0.207368	0.169473	0.0557872	0.169473	0.0557872	0.169473	0.0936824	-0.0578985	-0.209479	0.0936824
CDH16010_20161025_S_01A	F	X	R	0.0501308	-0.10058	0.313875	0.200842	0.0124531	0.0124531	0.0501308	0.0878086	0.163164	-0.0629025	-0.10058	-0.0629025	0.23852	0.0878086	0.0124531	0.200842	-0.175936	-0.138258	-0.0252247	-0.10058	-0.0629025	-0.138258	0.276197	0.0878086	0.200842	0.163164	0.464586	0.163164	0.125486	-0.10058	0.200842	-0.138258	0.125486	0.0878086	-0.0629025	0.426909	-0.175936	0.23852	-0.213614	0.0878086
CDH16010_20161025_S_01B	F		R	0.058288	-0.21065	0.058288	-0.00894649	-0.076181	0.259992	-0.076181	-0.21065	-0.00894649	-0.076181	-0.143415	-0.143415	-0.143415	-0.21065	-0.277884	-0.21065	-0.076181	-0.00894649	-0.143415	-0.076181	-0.00894649	-0.143415	-0.143415	0.058288	-0.21065	-0.00894649	0.058288	-0.076181	0.058288	0.058288	-0.076181	0.058288	0.125523	-0.21065	-0.00894649	-0.21065	-0.21065	-0.21065	-0.143415	-0.076181
CDH16010_20161025_S_05A	F	X	L	-0.334862	-0.182805	-0.182805	-0.233491	-0.258834	-0.233491	-0.00540435	-0.157462	-0.0307473	-0.233491	-0.385548	-0.258834	-0.182805	-0.309519	-0.157462	-0.132119	-0.334862	-0.284176	-0.309519	-0.00540435	-0.258834	-0.410891	-0.208148	-0.410891	-0.233491	-0.106776	-0.334862	-0.0814331	-0.132119	-0.334862	-0.284176	-0.436234	-0.208148	-0.334862	-0.360205	-0.157462	-0.436234	-0.309519	-0.385548	-0.208148
CDH16010_20161025_S_05B	F	X	R	-0.121666	0.0664969	-0.215747	0.0664969	0.113538	-0.121666	-0.0275843	0.3017	0.113538	-0.356869	-0.0746249	0.113538	-0.0275843	-0.168706	-0.0275843	-0.0275843	-0.121666	-0.121666	0.160578	-0.0746249	-0.0746249	-0.168706	-0.215747	-0.0746249	0.0194563	-0.168706	-0.215747	-0.121666	-0.121666	-0.0746249	-0.215747	-0.168706	0.160578	0.207619	0.207619	-0.168706	0.160578	-0.0746249	-0.121666	0.113538
CDH16010_20161025_S_07A	F		L	-0.192735	-0.134823	-0.221691	-0.163779	-0.221691	-0.250647	-0.337514	-0.250647	-0.279603	-0.192735	-0.250647	-0.337514	-0.250647	-0.221691	-0.221691	-0.221691	-0.221691	-0.250647	-0.0769114	-0.279603	-0.221691	-0.163779	-0.134823	-0.0479555	-0.250647	-0.308559	-0.221691	-0.279603	-0.337514	-0.453338	-0.395426	-0.163779	-0.221691	-0.308559	-0.105867	-0.453338	-0.308559	-0.163779	-0.279603	-0.163779
CDH16010_20161025_S_07B	F	X	R	-0.103741	-0.0275943	-0.141814	0.0866254	0.0485522	0.162772	-0.21796	0.124699	0.200845	-0.103741	-0.179887	0.0485522	-0.0656675	0.0866254	-0.256034	-0.103741	0.0104789	0.162772	-0.0656675	0.162772	0.0866254	-0.0275943	0.200845	-0.0275943	0.0485522	-0.0275943	0.0485522	0.0104789	-0.179887	-0.21796	-0.141814	-0.103741	0.124699	-0.0656675	0.238918	0.162772	-0.103741	-0.103741	-0.0275943	-0.179887
CDH16010_20161025_S_11A	F	X	R	-0.0500846	-0.218709	-0.0500846	-0.00792845	-0.00792845	0.160696	-0.0500846	0.11854	-0.0500846	0.0342277	-0.134397	-0.0500846	-0.134397	0.11854	-0.176553	-0.0922407	-0.00792845	0.160696	0.287164	0.0763838	0.245008	0.202852	0.11854	0.0342277	-0.00792845	-0.00792845	0.11854	0.0763838	-0.134397	0.202852	-0.00792845	-0.0922407	0.11854	-0.00792845	0.32932	-0.00792845	0.287164	0.202852	0.0763838	-0.176553
CDH16010_20161025_S_13A	F		R	0.208745	-0.109161	0.0497919	0.261729	0.473666	0.15576	-0.00319233	0.0497919	0.314713	0.579634	-0.00319233	0.0497919	-0.109161	-0.215129	-0.162145	-0.00319233	-0.215129	-0.0561766	-0.109161	-0.00319233	0.261729	0.15576	-0.215129	0.420682	-0.00319233	0.367697	-0.0561766	0.102776	-0.0561766	0.261729	0.420682	0.15576	-0.0561766	0.15576	0.102776	0.15576	-0.0561766	-0.0561766	-0.0561766	0.261729
CDH16010_20161025_S_15A	F	X	L	0.0477997	0.0477997	-0.120022	-0.329798	-0.036111	-0.161977	-0.0780663	-0.371754	-0.413709	-0.203932	-0.245888	-0.245888	-0.371754	-0.245888	-0.287843	-0.245888	-0.455664	-0.413709	-0.245888	-0.161977	-0.413709	-0.49762	-0.455664	-0.413709	-0.245888	-0.371754	-0.371754	-0.455664	-0.413709	-0.455664	-0.287843	-0.329798	-0.287843	-0.203932	-0.329798	-0.203932	-0.245888	-0.036111	-0.120022	-0.287843
CDH16010_20161025_S_17A	F		R	0.244467	0.0247137	-0.19504	-0.158414	-0.121789	-0.341542	-0.19504	-0.0119118	-0.158414	0.0247137	-0.414793	-0.121789	-0.414793	-0.268291	-0.304916	-0.0119118	-0.304916	-0.121789	-0.121789	-0.231665	-0.158414	-0.158414	0.171216	-0.19504	-0.158414	0.0247137	0.0613393	-0.121789	-0.085163	0.0247137	-0.0119118	-0.0485374	-0.0119118	-0.268291	-0.085163	-0.304916	-0.0485374	-0.231665	-0.158414	-0.19504
CDH16010_20161025_S_17B	F	X	L	0.161211	0.191898	0.0384658	-0.0535934	0.0691522	0.0691522	-0.237712	-0.114966	-0.0535934	-0.145653	-0.176339	-0.0535934	-0.114966	0.0384658	-0.0535934	-0.0535934	0.130525	0.161211	-0.0535934	0.0691522	0.0384658	0.0691522	0.161211	0.130525	-0.022907	0.191898	0.161211	0.0998386	0.253271	0.0998386	0.0998386	0.376016	0.0384658	0.130525	0.0384658	0.0384658	0.0998386	0.130525	0.0691522	-0.176339
CDH16010_20161025_S_21A	F	X	R	-0.12756	-0.0784641	-0.225753	-0.103012	-0.348493	-0.373041	-0.348493	0.0933725	-0.299397	-0.348493	-0.250301	-0.618522	-0.176656	-0.12756	-0.323945	-0.103012	-0.274849	-0.348493	-0.201205	-0.12756	-0.373041	-0.103012	-0.225753	-0.348493	-0.274849	-0.152108	-0.0784641	-0.201205	-0.274849	-0.053916	-0.225753	-0.250301	-0.201205	0.117921	-0.053916	0.289757	0.191565	-0.00481988	0.0933725	-0.00481988
CDH16010_20161025_S_21B	F	X	L	0.127135	0.079925	0.19795	0.386791	0.127135	0.0327149	0.174345	0.292371	0.10353	0.127135	-0.203336	-0.132521	-0.203336	-0.0144953	-0.108916	-0.179731	-0.108916	-0.203336	-0.203336	-0.368571	0.10353	-0.250546	-0.156126	-0.0853105	-0.274151	0.0563199	-0.250546	-0.132521	0.00910978	0.127135	0.127135	0.410396	0.292371	0.174345	0.315976	0.599237	0.174345	0.15074	0.174345	0.174345
CDH16010_20161025_S_23A	F	X	L	0.117252	0.460327	0.166263	0.313295	0.3378	0.313295	0.65637	0.239779	0.852413	1.04846	0.999445	0.558349	0.533843	0.484833	0.362306	0.558349	0.582854	0.435822	0.484833	0.313295	0.386811	0.362306	0.166263	0.190768	-0.054285	0.0437363	-0.054285	-0.103296	0.0682417	0.166263	0.166263	-0.127801	0.190768	-0.0787904	0.0682417	0.141758	0.411317	0.141758	0.0437363	0.190768
CDH16010_20161025_S_23B	F	X	L	0.210392	-0.192715	0.0553509	0.644507	0.303416	0.830556	0.675515	0.489466	0.768539	1.51274	1.91584	1.48173	1.72979	1.23366	0.861564	0.799547	0.954588	0.675515	0.58249	0.551482	0.272408	0.334425	0.58249	0.365433	0.2414	0.334425	0.179384	0.179384	0.0243427	-0.0686818	-0.0376736	0.2414	-0.00666544	0.303416	0.2414	-0.00666544	0.117367	0.117367	0.148376	0.0863591
CDH16010_20161025_S_23C	F		L	0.0774681	-0.0528765	-0.000738642	-0.0789454	-0.261428	0.0253303	-0.000738642	-0.105014	-0.183221	-0.287497	-0.0268076	0.155675	0.155675	0.338157	-0.0268076	0.286019	0.207813	0.103537	-0.0528765	0.233882	-0.0789454	0.155675	0.129606	0.25995	0.364226	0.286019	-0.105014	0.286019	-0.000738642	0.233882	-0.235359	0.0513992	-0.0268076	-0.000738642	-0.313566	-0.0789454	-0.000738642	-0.000738642	-0.183221	-0.261428
CDH16010_20161025_S_23D	F	X	L	0.0272366	-0.0738496	-0.208631	-0.0401542	0.195714	-0.0401542	0.128323	0.364191	-0.107545	0.0946274	0.633754	0.903317	0.431581	0.195714	0.465277	-0.0401542	0.060932	0.229409	0.431581	0.0272366	-0.00645881	0.128323	-0.107545	-0.00645881	-0.00645881	-0.242327	0.397886	-0.107545	0.0946274	0.0946274	-0.14124	0.330495	-0.0738496	-0.0738496	0.0272366	0.162018	-0.107545	-0.242327	0.060932	-0.242327
CDH16010_20161025_S_25A	F	X	L	-0.164934	-0.269365	-0.269365	-0.0953138	-0.130124	-0.0605035	-0.0953138	-0.0605035	-0.269365	-0.269365	-0.582658	-0.338986	-0.234555	-0.304176	-0.0605035	-0.199745	-0.373796	-0.234555	-0.269365	-0.443417	-0.304176	-0.304176	-0.478227	-0.582658	-0.408607	-0.478227	-0.304176	-0.304176	-0.443417	0.113548	-0.547848	-0.269365	-0.338986	-0.338986	-0.478227	-0.373796	-0.338986	-0.164934	-0.338986	-0.234555
CDH16010_20161025_S_25B	F	X	L	-0.25345	-0.218723	-0.0450922	-0.0798184	0.0243603	-0.183997	-0.149271	-0.183997	-0.0450922	-0.218723	0.892516	1.41341	1.58704	1.62177	1.96903	1.55231	1.23978	0.545254	0.892516	0.545254	0.961969	0.892516	0.788337	1.17033	0.823064	0.649432	0.614706	0.788337	0.684159	0.267444	0.336896	0.30217	0.267444	0.406349	0.545254	0.510528	0.336896	0.267444	0.545254	0.30217
CDH16010_20161025_S_25C	F	X	L	0.0286044	0.0890357	-0.0318269	0.0890357	-0.0620426	-0.15269	-0.122474	-0.00161126	-0.273552	-0.122474	-0.0620426	-0.273552	-0.0620426	-0.243337	-0.122474	-0.0620426	0.0286044	-0.182905	-0.15269	-0.273552	-0.213121	-0.0620426	-0.15269	-0.122474	-0.0318269	0.0286044	0.149467	-0.0922582	-0.00161126	0.0286044	-0.0620426	-0.243337	-0.0318269	-0.303768	-0.0318269	0.119251	0.179683	-0.364199	-0.0922582	0.119251
CDH16010_20161025_S_25D	F	X	R	-0.320833	-0.392383	-0.535482	-0.320833	-0.356608	-0.392383	-0.356608	-0.463933	-0.499708	-0.463933	-0.463933	-0.499708	-0.392383	-0.392383	-0.463933	-0.428158	-0.320833	-0.428158	-0.463933	-0.463933	-0.428158	-0.499708	-0.320833	-0.428158	-0.463933	-0.499708	-0.499708	-0.463933	-0.392383	-0.428158	-0.499708	-0.392383	-0.249283	-0.141958	-0.392383	-0.392383	-0.356608	-0.356608	0.0726913	-0.285058
CDH16010_20161025_S_25E	F		R	-0.261927	-0.0267457	-0.261927	-0.329121	-0.329121	-0.127538	-0.194732	0.107643	-0.060343	-0.161135	-0.429913	-0.261927	-0.362719	-0.0267457	-0.127538	-0.0939403	-0.194732	-0.46351	-0.127538	-0.329121	-0.194732	-0.0267457	0.0740461	0.208435	-0.0939403	-0.0939403	0.309227	0.174838	0.242032	0.00685155	-0.060343	0.00685155	0.00685155	-0.261927	-0.295524	-0.0939403	-0.228329	-0.161135	-0.228329	-0.194732
CDH16010_20161025_S_27A	F	X	R	0.305163	-0.00830262	0.187613	0.501079	0.0700637	0.814544	0.618628	0.461896	0.618628	0.971277	0.696995	0.657812	0.579445	0.305163	0.344346	0.579445	0.383529	0.226796	0.26598	0.0700637	-0.00830262	0.187613	0.109247	0.14843	-0.0474858	0.109247	0.26598	0.109247	0.226796	0.226796	0.540262	0.226796	0.187613	0.501079	0.696995	0.226796	0.461896	0.14843	0.540262	0.109247
CDH16010_20161025_S_27B	F	X	L	0.284924	0.348252	0.41158	-5.30589e-05	0.25326	0.158267	0.189931	0.5699	0.316588	0.886541	0.5699	0.886541	1.0132	0.633229	0.5699	0.25326	0.5699	0.5699	0.189931	0.443244	0.474908	-0.0950453	0.221596	0.0949392	0.158267	0.126603	-0.0950453	0.348252	0.348252	0.0632751	0.0632751	0.601564	0.474908	0.25326	0.443244	0.506572	0.316588	0.823213	0.601564	0.538236
CDH16010_20161025_S_27C	F	X	R	-0.0763721	-0.192987	-0.231858	0.117985	-0.192987	-0.0763721	0.0791138	0.00137082	-0.115244	-0.115244	0.273471	-0.192987	0.156857	-0.154115	-0.0763721	-0.192987	-0.270729	0.00137082	-0.0763721	-0.0375007	0.0791138	-0.0763721	-0.0375007	-0.154115	0.117985	-0.0763721	-0.0375007	0.0791138	-0.115244	-0.115244	-0.0763721	0.156857	0.0791138	0.2346	-0.0763721	0.117985	0.545571	0.117985	-0.0375007	0.273471
CDH16010_20161025_S_27D	F		L	0.0185228	-0.120653	0.0649148	0.204091	-0.0742611	0.111307	0.436051	0.111307	0.250483	0.0649148	0.436051	0.204091	0.204091	0.668011	-0.0742611	-0.0742611	-0.120653	-0.0742611	-0.0278692	-0.167045	-0.0278692	-0.0278692	0.0185228	-0.213437	-0.306221	-0.167045	0.204091	-0.120653	-0.120653	-0.0742611	-0.0278692	0.111307	0.157699	0.111307	-0.0278692	0.0185228	-0.120653	-0.120653	0.157699	-0.0278692
CDH16010_20161025_S_27E	F	X	R	0.230236	-0.25452	-0.0424392	0.0787498	0.0181553	0.0787498	-0.224223	-0.0424392	-0.0424392	0.381722	0.199939	-0.103034	-0.193925	0.0181553	0.139344	0.260533	0.0484525	0.290831	0.6241	0.321128	0.109047	0.260533	0.109047	0.381722	0.109047	0.169642	0.472614	0.351425	-0.224223	0.260533	0.41202	-0.0424392	0.0787498	0.139344	0.169642	0.0181553	-0.0424392	-0.193925	0.260533	0.139344
CDH16010_20161025_S_29A	F		R	-0.0606402	-0.243553	0.21373	-0.33501	-0.152097	-0.213068	-0.243553	-0.274039	-0.0911257	-0.365496	-0.121611	-0.365496	0.0308164	-0.152097	-0.0911257	-0.0301547	-0.365496	0.122273	-0.365496	-0.33501	-0.304524	-0.213068	-0.517923	-0.0606402	-0.121611	-0.395981	-0.395981	-0.213068	-0.487438	-0.426467	-0.213068	-0.365496	-0.33501	-0.0911257	-0.0301547	-0.213068	-0.121611	0.000330872	0.152759	-0.33501
CDH16010_20161025_S_29B	F	X	L	0.0823474	-0.0617937	0.0823474	0.178441	0.202465	0.274536	0.827076	0.37063	0.250512	0.634888	0.947194	0.490747	0.466724	0.0343004	0.154418	0.538794	0.298559	0.178441	0.226488	0.0583239	0.37063	0.298559	0.250512	-0.0137467	-0.326052	0.0102768	-0.109841	0.0343004	-0.0858172	0.106371	0.37063	0.298559	0.130394	-0.0377702	-0.0137467	-0.0858172	0.202465	0.274536	0.0583239	0.250512
CDH16011_20161027_S_09A	F	X	L	0.287596	0.243169	0.154314	0.109887	0.465305	0.243169	0.243169	0.332023	0.287596	0.509732	0.198742	0.820722	0.909576	0.420877	0.287596	0.465305	0.420877	0.465305	0.154314	0.109887	-0.201103	0.0210329	-0.0678215	-0.201103	-0.378812	-0.156676	-0.289957	0.0210329	-0.24553	-0.334385	-0.289957	-0.0233943	0.109887	0.154314	0.154314	0.243169	0.332023	0.287596	0.243169	0.198742
CDH16011_20161027_S_15A	F	X	R	0.541552	0.715658	0.715658	0.616169	0.29283	0.317702	0.342574	0.143596	-0.00563709	-0.527954	-0.677187	-0.726932	-0.47821	-0.0305093	-0.0553816	-0.00563709	-0.328976	-0.279232	-0.403593	-0.254359	-0.428465	-0.15487	0.0689796	0.267957	0.641041	0.541552	0.815147	0.889763	0.889763	1.41208	0.74053	0.840019	0.765402	0.889763	0.715658	0.840019	0.342574	0.541552	0.392319	0.566424
CDH16011_20161027_S_29A	F	X	R	0.157116	0.285976	-0.0361742	0.221546	-0.229464	0.0282559	0.092686	-0.358325	-0.100604	0.157116	-0.165034	-0.0361742	-0.100604	-0.165034	-0.100604	-0.100604	-0.0361742	-0.0361742	-0.229464	-0.293895	-0.100604	-0.229464	-0.293895	-0.0361742	-0.293895	0.0282559	0.157116	-0.0361742	-0.165034	0.092686	0.0282559	-0.165034	0.092686	0.0282559	0.157116	0.157116	-0.293895	0.0282559	0.221546	0.092686
CDH16011_20161027_S_31A	F	X	L	0.500655	0.335015	0.169375	0.500655	0.00373483	-0.161905	0.169375	-0.244725	0.0865548	-0.161905	-0.244725	-0.244725	-0.161905	-0.0790852	-0.161905	0.252195	0.169375	0.417835	0.666295	0.749115	1.24603	0.666295	0.500655	0.749115	0.914755	0.666295	0.997575	0.749115	0.335015	0.335015	-0.161905	0.169375	0.252195	-0.0790852	0.00373483	0.00373483	-0.244725	0.00373483	-0.0790852	-0.244725
CDH169019_20161018_S_01A	M	X	R	-0.211886	-0.0768912	0.0581036	-0.289026	0.154528	0.173813	0.135243	0.173813	0.115958	-0.0190363	-0.0576063	-0.0383213	-0.0961762	-0.192601	-0.0768912	-0.0576063	-0.192601	-0.0190363	-0.154031	0.0581036	0.0581036	0.00024865	0.173813	-0.0383213	-0.115461	0.00024865	-0.115461	-0.154031	-0.308311	-0.154031	0.00024865	-0.269741	-0.192601	-0.0190363	-0.192601	-0.173316	0.00024865	-0.0768912	0.0195336	-0.115461
CDH169019_20161018_S_03A	M	X	R	0.00945772	-0.0623265	-0.0623265	-0.0623265	-0.134111	0.0453498	-0.134111	-0.170003	-0.170003	0.00945772	-0.385355	-0.385355	-0.349463	-0.349463	-0.421247	-0.349463	-0.421247	-0.313571	-0.277679	-0.313571	-0.205895	-0.241787	-0.0264344	-0.205895	0.0812419	0.188918	0.153026	0.260702	-0.0623265	-0.134111	0.0453498	-0.0264344	0.332487	0.332487	-0.0264344	0.188918	0.0453498	0.188918	0.0812419	-0.170003
CDH169019_20161018_S_05A	M	X	L	0.190772	0.277801	0.538886	0.33582	0.219782	-0.0413035	0.103744	-0.157341	-0.21536	0.045725	-0.360408	-0.418427	-0.360408	-0.273379	-0.070313	-0.128332	-0.24437	-0.157341	-0.012294	0.0167155	-0.0413035	-0.0413035	0.045725	0.103744	0.132753	0.509877	0.538886	0.393839	0.625915	0.741953	0.451858	0.538886	0.567896	0.422848	0.277801	0.33582	0.393839	0.480867	0.0747345	0.045725
CDH169019_20161018_S_09A	M	X	R	-0.107997	-0.258029	-0.158008	-0.233024	-0.283034	-0.433066	-0.183013	-0.283034	-0.133003	-0.35805	-0.333045	-0.533087	-0.458071	-0.483076	-0.433066	-0.483076	-0.558092	-0.458071	-0.383055	-0.383055	-0.558092	-0.433066	-0.458071	-0.383055	-0.483076	-0.433066	-0.583098	-0.408061	-0.433066	-0.508082	-0.458071	-0.333045	-0.533087	-0.483076	-0.333045	-0.433066	-0.30804	-0.30804	-0.30804	-0.333045
CDH169019_20161018_S_09B	M	X	R	-0.162487	-0.22006	-0.191273	-0.104913	-0.162487	-0.104913	-0.0761269	0.0965924	0.0965924	-0.1337	-0.421565	-0.306419	-0.479138	-0.335206	-0.450352	-0.306419	-0.536712	-0.507925	-0.479138	-0.507925	-0.594285	-0.623071	-0.479138	-0.536712	-0.479138	-0.565498	-0.306419	-0.277633	-0.248846	-0.162487	-0.0185538	0.0102327	0.182952	0.125379	0.154165	0.269312	0.52839	0.499604	0.672323	0.61475
CDH169019_20161018_S_09C	M	X	L	0.310622	0.165788	0.331312	-0.144571	0.103716	0.0623346	-0.206643	-0.123881	0.0209534	-0.123881	0.145097	0.165788	0.0623346	-0.0411184	-0.123881	-0.289406	-0.289406	-0.537693	-0.413549	-0.372168	-0.392859	-0.289406	-0.43424	-0.10319	-0.43424	-0.0824996	-0.0824996	0.103716	-0.0824996	-0.0411184	0.103716	0.000262778	0.331312	0.393384	0.124406	0.24855	0.24855	0.124406	0.186478	0.289931
CDH169019_20161018_S_21A	M	X	R	-0.152727	0.0921462	-0.0438947	-0.315976	-0.179936	0.064938	-0.207144	-0.234352	-0.0166865	-0.125519	-0.152727	0.146562	-0.0711028	0.391436	0.473061	0.228187	0.418644	0.200979	0.064938	0.364228	0.0377298	0.064938	0.173771	0.0105217	-0.179936	-0.125519	-0.26156	-0.234352	-0.207144	-0.179936	-0.288768	-0.26156	-0.152727	-0.0438947	-0.152727	-0.179936	-0.370393	-0.288768	-0.0166865	-0.26156
CDH169019_20161018_S_25A	M	X	L	-0.0547032	-0.217283	-0.0547032	-0.0140583	0.0265866	0.392391	0.229811	0.0672315	0.311101	0.229811	0.676905	1.08335	0.514326	0.473681	0.554971	0.189166	-0.135993	0.0672315	0.0265866	0.148521	-0.135993	-0.0140583	0.189166	0.270456	0.229811	0.270456	0.0672315	0.189166	0.473681	0.311101	0.148521	0.433036	0.148521	0.311101	-0.0953481	0.0672315	-0.0547032	0.351746	-0.0140583	0.107876
EMR17001_20170705_S_03A	F	X	L	0.562333	0.237112	0.155807	0.318418	0.277765	0.481028	0.277765	0.237112	0.155807	0.562333	0.724944	0.0745021	0.521681	0.318418	0.481028	0.643639	0.277765	0.765596	0.602986	0.440376	0.318418	0.399723	1.00951	0.562333	0.115155	0.318418	0.318418	0.277765	0.0338494	0.237112	-0.169414	0.277765	-0.00680317	0.155807	0.0745021	-0.210066	0.0338494	-0.291371	-0.0881084	-0.0881084
EMR17001_20170705_S_07A	F	X	R	0.143404	0.424626	0.35432	0.213709	0.776153	0.565236	0.635542	0.916764	0.846458	0.776153	0.705847	0.00279325	0.284015	0.284015	0.284015	-0.0675122	0.0730987	0.00279325	-0.137818	-0.0675122	-0.208123	0.35432	0.213709	-0.137818	0.213709	-0.0675122	0.143404	0.0730987	0.0730987	-0.137818	-0.137818	0.213709	0.143404	0.213709	-0.0675122	0.00279325	-0.0675122	-0.0675122	0.0730987	0.143404
EMR17001_20170705_S_07B	F		R	-0.124937	-0.0282386	0.06846	-0.221636	-0.0282386	0.165159	0.165159	0.261857	-0.0282386	0.06846	-0.124937	-0.0282386	-0.221636	0.165159	-0.221636	-0.0282386	-0.124937	-0.124937	-0.221636	-0.124937	-0.221636	-0.124937	0.06846	-0.221636	-0.221636	-0.221636	-0.221636	-0.124937	-0.221636	-0.124937	-0.124937	0.261857	-0.124937	-0.0282386	-0.124937	-0.221636	-0.124937	0.165159	-0.124937	-0.221636
EMR17001_20170705_S_09A	F	X	L	-0.0512077	0.00972329	0.314378	0.192516	0.497171	0.619033	0.679964	0.801826	1.28927	1.16741	0.984619	0.984619	0.375309	0.131585	-0.112139	0.131585	-0.234001	-0.234001	-0.0512077	-0.234001	-0.234001	-0.234001	-0.234001	-0.234001	-0.234001	-0.234001	-0.234001	-0.17307	-0.17307	-0.17307	-0.234001	-0.234001	-0.17307	-0.17307	-0.234001	-0.17307	-0.234001	-0.17307	-0.234001	-0.234001
EMR17001_20170705_S_09B	F	X	L	-0.0954179	-0.0954179	0.101483	-0.193868	0.00303276	0.396835	0.00303276	0.00303276	-0.0954179	0.199934	-0.0954179	0.00303276	0.101483	-0.0954179	0.199934	-0.0954179	0.101483	-0.193868	0.00303276	0.00303276	0.00303276	0.00303276	0.101483	-0.193868	-0.193868	0.00303276	0.00303276	0.00303276	0.00303276	-0.193868	0.00303276	-0.0954179	-0.0954179	-0.193868	-0.193868	-0.193868	-0.0954179	-0.193868	-0.0954179	-0.0954179
EMR17001_20170705_S_11A	F		L	0.0157824	0.0157824	0.122497	0.0157824	0.335927	-0.0909324	-0.0909324	0.229212	0.0157824	-0.0909324	0.0157824	-0.0909324	0.0157824	0.335927	0.0157824	0.229212	0.229212	0.122497	0.0157824	0.549357	-0.0909324	0.0157824	0.229212	-0.0909324	0.335927	0.229212	0.0157824	0.0157824	0.335927	0.0157824	-0.0909324	0.442642	-0.0909324	0.122497	-0.0909324	-0.0909324	-0.0909324	0.0157824	-0.197647	-0.0909324
EMR17001_20170705_S_15A	F	X		-0.403158	-0.444552	-0.444552	-0.444552	-0.444552	-0.444552	-0.444552	-0.444552	-0.444552	-0.444552	-0.444552	-0.444552	-0.444552	-0.444552	-0.444552	-0.444552	-0.444552	-0.444552	-0.444552	-0.444552	-0.444552	-0.444552	-0.444552	-0.444552	-0.444552	-0.444552	-0.444552	-0.444552	-0.444552	-0.444552	-0.444552	-0.444552	-0.444552	-0.444552	-0.444552	-0.444552	-0.444552	-0.444552	-0.444552	-0.444552
EMR17001_20170705_S_15B	F			-0.126592	-0.126592	-0.159794	-0.159794	-0.159794	-0.159794	-0.159794	-0.159794	-0.126592	-0.159794	-0.159794	-0.159794	-0.159794	-0.159794	-0.159794	-0.159794	-0.159794	-0.159794	-0.159794	-0.159794	-0.159794	-0.159794	-0.159794	-0.159794	-0.159794	-0.159794	-0.159794	-0.159794	-0.159794	-0.159794	-0.159794	-0.159794	-0.159794	-0.159794	-0.159794	-0.159794	-0.159794	-0.159794	-0.159794	-0.159794
EMR17001_20170705_S_15C	F	X	R	-0.225381	-0.138679	-0.312084	-0.283183	-0.369886	-0.312084	-0.312084	-0.369886	-0.398787	-0.369886	-0.340985	-0.340985	-0.369886	-0.283183	-0.369886	-0.369886	-0.369886	-0.369886	-0.340985	-0.283183	-0.369886	-0.283183	-0.312084	-0.312084	-0.19648	-0.283183	-0.19648	-0.312084	-0.283183	-0.254282	-0.312084	-0.051976	-0.19648	-0.051976	-0.051976	-0.0230751	0.0347267	-0.0230751	0.0347267	0.0636275
EMR17001_20170705_S_17A	F	X	R	0.143051	0.0681125	0.292928	0.255458	0.105582	0.105582	-0.00682591	0.330397	0.18052	-0.156703	0.0306433	0.217989	0.0681125	0.18052	0.367866	-0.00682591	0.330397	0.255458	0.292928	0.18052	0.442804	0.105582	0.480274	0.105582	0.367866	0.18052	0.405335	-0.119233	0.18052	0.480274	0.105582	0.0681125	0.105582	0.0681125	0.0306433	0.217989	-0.26911	0.143051	-0.119233	0.18052
EMR17001_20170705_S_17B	F		L	-0.369107	-0.175019	-0.126496	-0.126496	-0.175019	-0.0294518	-0.272063	-0.272063	-0.175019	-0.126496	-0.320585	-0.369107	-0.126496	-0.175019	-0.175019	-0.272063	0.0190704	-0.077974	-0.0294518	-0.126496	-0.0294518	-0.077974	-0.077974	-0.126496	-0.175019	-0.0294518	-0.077974	-0.126496	-0.175019	-0.126496	-0.320585	-0.320585	-0.369107	-0.126496	-0.223541	-0.077974	-0.175019	-0.175019	-0.175019	-0.175019
EMR17001_20170705_S_21A	F	X	L	0.499444	0.566501	0.36533	0.532972	0.633558	0.264745	0.868257	0.432387	0.667086	0.868257	0.767671	0.700614	0.0635743	0.734143	0.264745	0.298273	0.130631	0.398859	0.231216	0.36533	0.231216	0.264745	0.8012	0.532972	0.700614	0.767671	0.767671	0.734143	0.935313	0.767671	0.868257	0.633558	1.0359	0.767671	0.834728	0.968842	1.00237	0.868257	0.767671	0.8012
EMR17001_20170705_S_21B	F		L	0.0213062	0.171556	0.0213062	0.133993	0.246681	0.0213062	0.0213062	-0.0913809	-0.0162562	0.0588686	0.209118	-0.0538185	-0.0913809	-0.0913809	-0.0913809	0.284243	0.321805	-0.166506	0.133993	-0.0913809	-0.0162562	0.0213062	-0.128943	-0.0913809	0.171556	-0.128943	0.0213062	0.096431	0.133993	0.096431	0.359368	0.133993	-0.0538185	-0.0162562	0.0588686	0.171556	0.246681	0.171556	0.209118	0.246681
EMR17001_20170705_S_23A	F	X	R	-0.00795046	-0.0988047	-0.0382352	-0.00795046	-0.0382352	-0.0382352	-0.189659	-0.219944	-0.0988047	-0.189659	-0.06852	-0.310798	-0.431937	-0.250228	-0.189659	-0.219944	-0.0988047	-0.371368	-0.189659	-0.219944	-0.250228	-0.250228	-0.401652	-0.219944	-0.341083	-0.310798	-0.250228	-0.129089	-0.0988047	-0.341083	-0.250228	-0.341083	-0.250228	-0.250228	-0.219944	-0.129089	-0.462222	-0.219944	-0.250228	-0.219944
EMR17001_20170705_S_23B	F	X	L	0.0473904	-0.140903	0.141537	0.0944636	-0.140903	0.141537	-0.140903	0.141537	-0.0938294	0.282757	0.0473904	0.0473904	-0.0467561	0.0473904	0.0944636	0.000317118	-0.140903	-0.0467561	-0.0467561	0.423976	0.0944636	-0.0938294	-0.0938294	0.0944636	0.000317118	-0.0938294	-0.0938294	0.0944636	-0.0467561	-0.140903	-0.235049	0.0473904	0.0944636	-0.187976	-0.187976	0.000317118	-0.140903	-0.0467561	-0.329196	-0.140903
EMR17001_20170705_S_23C	F	X	R	-0.070631	0.063524	0.00986198	-0.151124	-0.204786	0.036693	0.144017	-0.231617	-0.097462	0.144017	0.117186	0.090355	-0.070631	-0.177955	-0.070631	-0.097462	-0.070631	0.063524	0.00986198	-0.097462	-0.070631	-0.016969	-0.124293	-0.124293	-0.070631	-0.177955	-0.070631	-0.258448	-0.097462	0.090355	-0.204786	-0.124293	-0.204786	-0.204786	-0.0438	-0.124293	-0.016969	-0.285279	0.00986198	-0.097462
EMR17001_20170705_S_25A	F		R	-0.102061	-0.00925098	-0.102061	-0.102061	-0.00925098	-0.102061	-0.102061	-0.102061	-0.102061	-0.102061	-0.102061	-0.102061	-0.102061	-0.102061	-0.102061	-0.102061	-0.102061	-0.102061	-0.102061	-0.102061	-0.102061	-0.102061	-0.102061	-0.102061	-0.102061	-0.102061	-0.102061	-0.102061	0.176369	-0.00925098	0.0835592	-0.102061	-0.102061	-0.102061	-0.102061	-0.102061	-0.102061	-0.00925098	-0.102061	-0.102061
EMR17001_20170705_S_25B	F	X	R	-0.000185837	0.155309	0.116436	0.116436	0.194183	0.0775617	0.116436	0.116436	-0.000185837	0.116436	0.155309	0.0386879	-0.155681	-0.116807	-0.0390596	0.0386879	0.0775617	0.0775617	0.0775617	-0.000185837	0.116436	0.116436	-0.000185837	-0.000185837	0.0386879	-0.116807	0.271931	-0.000185837	-0.000185837	0.0386879	0.0775617	0.0386879	-0.000185837	0.116436	-0.116807	-0.233429	-0.0779334	-0.0390596	0.0386879	-0.194555
EMR17001_20170705_S_25C	F	X	L	0.0413884	0.216253	0.18128	0.391118	0.356145	0.426091	0.391118	0.251226	0.216253	0.18128	0.426091	0.426091	0.356145	0.00641539	0.111334	0.251226	0.146307	0.216253	0.0763613	-0.203422	0.0763613	-0.168449	-0.0635306	-0.273368	-0.0285576	-0.0985035	-0.168449	-0.0635306	0.0413884	-0.0985035	0.0763613	0.251226	0.356145	-0.133477	0.0763613	0.0763613	0.111334	0.00641539	0.216253	0.251226
EMR17001_20170705_S_25D	F	X	L	0.295938	0.295938	-0.0819955	0.295938	0.127968	0.505901	0.16996	0.505901	0.00198972	0.127968	0.379923	0.379923	0.127968	0.0439823	0.295938	0.211953	0.337931	0.253945	0.16996	0.211953	0.127968	0.16996	0.00198972	0.127968	0.127968	0.16996	0.0439823	0.00198972	0.211953	-0.123988	0.0439823	-0.0400029	0.0859749	-0.291959	0.295938	-0.207973	-0.207973	-0.0819955	0.253945	0.0439823
EMR17001_20170705_S_25E	F		L	-0.0560069	0.000355677	0.000355677	-0.281457	-0.33782	-0.168732	0.000355677	-0.112369	0.000355677	0.000355677	0.113081	0.169443	0.225806	-0.168732	0.113081	0.113081	0.225806	0.0567182	0.394894	0.282168	0.113081	-0.112369	0.394894	0.563981	0.000355677	0.0567182	0.338531	0.0567182	-0.225095	-0.112369	0.282168	0.113081	0.0567182	0.0567182	-0.168732	0.000355677	0.0567182	0.113081	0.225806	-0.112369
EMR17001_20170705_S_27A	F			-0.103357	-0.103357	-0.103357	-0.103357	-0.103357	-0.103357	-0.103357	-0.103357	-0.103357	-0.103357	-0.103357	-0.103357	-0.103357	-0.103357	-0.103357	-0.103357	-0.103357	-0.103357	-0.103357	-0.103357	-0.103357	-0.103357	-0.103357	-0.103357	-0.103357	-0.103357	-0.103357	-0.103357	-0.103357	-0.103357	-0.103357	-0.103357	-0.103357	-0.103357	-0.103357	-0.103357	-0.103357	-0.103357	-0.103357	-0.103357
EMR17001_20170705_S_27B	F		L	-0.137065	-0.137065	-0.137065	0.00533134	0.00533134	0.147728	0.290124	-0.137065	-0.137065	-0.137065	0.00533134	-0.137065	-0.137065	-0.137065	0.00533134	-0.137065	0.00533134	0.00533134	0.00533134	-0.137065	-0.137065	0.00533134	0.00533134	-0.137065	0.00533134	-0.137065	0.00533134	-0.137065	-0.137065	-0.137065	0.00533134	0.00533134	0.00533134	-0.137065	-0.137065	-0.137065	-0.137065	0.00533134	0.00533134	0.00533134
EMR17001_20170705_S_27C	F	X	L	0.503042	0.586945	0.167431	0.251334	0.503042	0.0835281	0.503042	0.419139	0.838653	0.503042	0.251334	0.251334	0.251334	0.670847	0.503042	0.335236	0.419139	0.0835281	0.335236	0.335236	0.503042	-0.000374688	0.0835281	0.251334	0.167431	0.335236	0.0835281	0.251334	0.335236	0.0835281	-0.0842774	0.167431	-0.000374688	-0.000374688	0.335236	-0.0842774	0.251334	-0.000374688	-0.000374688	0.167431
EMR17001_20170705_S_27D	F		R	-0.0859141	-0.0859141	-0.0859141	-0.0859141	-0.0859141	-0.0859141	-0.0859141	-0.0859141	-0.0859141	-0.0859141	-0.0859141	-0.0859141	-0.0859141	-0.0859141	-0.0859141	-0.0859141	-0.0859141	-0.0859141	-0.0859141	-0.0859141	-0.0859141	-0.0859141	-0.0859141	-0.0859141	-0.0859141	-0.0859141	-0.0859141	-0.0859141	-0.0859141	-0.0859141	-0.0859141	-0.0859141	-0.0859141	-0.0859141	-0.0859141	-0.0859141	-0.0859141	-0.0859141	-0.0859141	-0.0859141
EMR17001_20170705_S_29A	F	X	L	0.220978	0.591973	0.591973	0.220978	0.313727	0.406476	0.267352	-0.196392	0.0354804	0.0354804	0.545599	0.0818548	0.0818548	0.220978	0.406476	0.360101	0.313727	0.360101	0.499225	0.360101	0.591973	0.406476	0.360101	0.128229	-0.010894	-0.010894	0.267352	0.0354804	-0.103643	-0.103643	0.0354804	-0.103643	-0.150017	-0.196392	-0.103643	-0.196392	-0.289141	-0.196392	-0.196392	-0.0572685
EMR17001_20170705_S_31A	F	X	L	0.299922	-0.143296	0.122635	0.0339914	0.388565	0.211278	0.0339914	0.211278	-0.143296	0.388565	0.122635	0.0339914	-0.0546521	-0.143296	0.211278	0.388565	0.122635	0.388565	0.0339914	0.477209	0.211278	0.0339914	0.122635	0.122635	0.0339914	0.654496	0.122635	0.122635	-0.143296	0.211278	0.299922	-0.0546521	-0.231939	0.0339914	0.122635	0.122635	-0.143296	-0.231939	-0.0546521	-0.0546521
EMR17002_20170824_S_01A	F	X	L	-0.0643854	0.005298	0.121437	0.167893	0.40017	0.0285258	0.260804	0.307259	0.0749814	0.237576	0.493082	0.353715	0.678904	0.353715	0.307259	0.40017	0.260804	0.353715	0.330487	0.562765	0.376943	0.284032	0.632448	0.423398	0.19112	0.19112	0.19112	0.40017	0.167893	-0.0411576	0.353715	0.469854	0.0517536	0.214348	0.0982092	-0.0179298	-0.0876132	-0.157297	-0.110841	0.167893
EMR17002_20170824_S_05A	F	X	R	0.0114901	0.0382643	0.131974	0.0248772	-0.0688325	-0.149155	-0.202704	-0.323188	-0.430284	-0.457059	-0.724801	-0.711414	-0.698026	-0.671252	-0.617704	-0.698026	-0.684639	-0.657865	-0.617704	-0.59093	-0.470446	-0.390123	-0.175929	-0.256252	-0.242865	-0.135768	0.0784257	0.118587	0.372942	0.627297	0.721007	0.734394	0.814716	0.828104	1.09585	1.31004	1.29665	1.06907	1.01552	1.0423
EMR17002_20170824_S_07A	F	X	R	-0.260216	-0.126782	-0.17126	-0.0378267	-0.0823045	-0.0378267	-0.17126	-0.215738	-0.17126	0.0066511	0.0066511	0.0956068	-0.0823045	0.184562	0.0066511	-0.126782	-0.126782	0.140085	0.0956068	-0.0823045	-0.0823045	-0.0823045	-0.126782	-0.0378267	-0.126782	-0.0378267	-0.0823045	-0.0378267	-0.0378267	0.0511289	-0.0823045	0.140085	0.0066511	0.184562	0.0956068	0.0956068	0.0066511	0.0511289	-0.126782	0.0511289
EMR17002_20170824_S_09A	F	X	L	0.398987	0.432168	0.349215	0.299443	0.166718	0.0837642	-0.0157798	-0.231459	-0.331003	-0.380775	-0.480319	-0.430547	-0.480319	-0.447137	-0.447137	-0.447137	-0.331003	-0.347593	-0.248049	-0.281231	-0.26464	-0.181687	-0.198277	-0.214868	-0.231459	-0.380775	-0.380775	-0.397365	-0.430547	-0.463728	-0.380775	-0.380775	-0.430547	-0.397365	-0.413956	-0.480319	-0.496909	-0.447137	-0.496909	-0.5135
EMR17002_20170824_S_09B	F	X	R	-0.288913	-0.162675	-0.0995556	-0.225794	-0.0364363	-0.0364363	-0.0364363	-0.194234	-0.320473	-0.225794	-0.352033	-0.257354	-0.225794	-0.320473	-0.288913	-0.383592	-0.162675	-0.257354	-0.162675	-0.288913	-0.257354	-0.225794	-0.194234	-0.131115	-0.131115	-0.288913	-0.131115	-0.131115	-0.00487672	-0.225794	0.0266829	-0.225794	-0.194234	-0.0995556	-0.288913	-0.131115	-0.162675	-0.320473	-0.131115	-0.288913
EMR17002_20170824_S_11A	F	X	L	-0.167945	-0.0193029	0.129339	-0.0193029	0.129339	0.0797918	0.0797918	-0.26704	-0.0193029	-0.167945	-0.26704	-0.0688502	-0.167945	-0.167945	-0.217492	-0.0193029	-0.26704	-0.167945	-0.217492	-0.217492	-0.217492	-0.217492	-0.118398	-0.118398	-0.167945	-0.118398	-0.217492	-0.167945	-0.167945	-0.0688502	-0.118398	-0.0688502	-0.0193029	-0.26704	-0.217492	-0.118398	-0.167945	-0.118398	-0.167945	-0.118398
EMR17002_20170824_S_11B	F		L	-0.0359568	-0.0359568	0.0242598	-0.0961733	-0.0961733	-0.0359568	-0.0359568	-0.216606	-0.0359568	0.204909	0.144693	0.0242598	0.0242598	0.0844763	0.0242598	-0.0359568	0.0242598	0.144693	0.0844763	0.0844763	0.0844763	0.0242598	-0.216606	0.0242598	0.0844763	-0.0961733	0.144693	-0.0359568	0.0242598	0.0242598	0.0242598	0.265126	0.0242598	0.144693	0.144693	-0.0961733	-0.0359568	0.0844763	-0.0961733	-0.0961733
EMR17002_20170824_S_23A	F		L	0.231747	0.278079	8.81381e-05	8.81381e-05	8.81381e-05	0.139084	0.417074	0.139084	0.0927518	0.231747	0.185415	0.231747	0.0927518	0.231747	0.0927518	8.81381e-05	0.0464199	-0.0462437	-0.0925755	-0.231571	-0.0925755	8.81381e-05	0.0927518	-0.138907	0.231747	-0.138907	-0.0462437	-0.0925755	0.0464199	-0.0462437	-0.0462437	-0.185239	0.0464199	-0.0462437	-0.0925755	0.278079	0.185415	0.0464199	-0.0925755	-0.0462437
EMR17002_20170824_S_23B	F	X	L	-0.18446	-0.0208674	-0.18446	-0.18446	-0.151742	-0.18446	-0.053586	0.175444	-0.053586	1.18972	0.2736	0.666224	0.437193	0.306319	0.0445699	-0.0208674	0.110007	-0.0208674	0.175444	0.339037	0.0445699	-0.151742	0.0445699	-0.151742	-0.0863046	-0.0863046	-0.217179	-0.249898	-0.18446	-0.249898	-0.0863046	-0.119023	-0.217179	-0.151742	-0.119023	-0.217179	-0.18446	-0.282616	-0.282616	-0.282616
EMR17002_20170824_S_27A	F		R	-0.290994	-0.255493	-0.326495	-0.326495	-0.326495	-0.326495	-0.326495	-0.326495	-0.326495	-0.326495	-0.326495	-0.326495	-0.326495	-0.326495	-0.326495	-0.326495	-0.326495	-0.326495	-0.326495	-0.326495	-0.326495	-0.290994	-0.290994	-0.255493	-0.255493	-0.290994	-0.255493	-0.255493	-0.290994	-0.290994	-0.290994	-0.219992	-0.255493	-0.184491	-0.255493	-0.290994	-0.290994	-0.290994	-0.255493	-0.184491
EMR17002_20170824_S_31A	F	X	L	-0.302632	-0.108206	-0.173015	-0.205419	-0.108206	-0.335036	-0.173015	0.0214105	-0.173015	0.831516	0.215836	0.24824	-0.205419	0.215836	0.0862189	-0.0433979	0.0214105	0.0214105	0.151027	0.118623	0.0214105	0.0214105	-0.0758021	0.0538147	0.0862189	0.118623	0.24824	0.0862189	0.0538147	-0.173015	0.215836	0.118623	0.0862189	0.0538147	-0.108206	0.0538147	-0.108206	-0.0433979	0.24824	-0.0433979
EMR17003_20170612_S_05A	F		R	-0.173231	-0.0856057	-0.173231	-0.173231	-0.0856057	-0.173231	0.00201974	-0.173231	-0.173231	-0.0856057	-0.173231	-0.173231	-0.173231	-0.173231	-0.0856057	-0.173231	-0.0856057	-0.0856057	-0.0856057	-0.173231	-0.0856057	-0.173231	-0.173231	-0.173231	-0.0856057	-0.173231	-0.173231	-0.173231	-0.173231	-0.0856057	-0.0856057	-0.173231	-0.0856057	-0.173231	-0.173231	-0.173231	-0.173231	-0.173231	-0.0856057	-0.173231
EMR17003_20170612_S_09A	F	X	R	-0.0334618	-0.0334618	0.112207	-0.106296	-0.0698791	-0.215548	-0.106296	-0.215548	-0.251966	-0.3248	-0.434052	-0.361218	-0.288383	-0.361218	-0.288383	-0.397635	-0.215548	-0.251966	-0.251966	-0.3248	-0.3248	-0.142714	-0.288383	-0.361218	-0.251966	-0.288383	-0.251966	-0.251966	-0.106296	-0.106296	-0.106296	-0.142714	0.00295548	-0.106296	-0.179131	-0.142714	-0.215548	-0.179131	-0.142714	-0.179131
EMR17003_20170612_S_09B	F	X	R	-0.347101	-0.304533	-0.304533	-0.304533	-0.261965	-0.219398	-0.261965	-0.134262	-0.304533	-0.00655833	-0.219398	-0.00655833	-0.17683	-0.261965	-0.347101	-0.304533	-0.219398	-0.17683	-0.304533	-0.17683	-0.304533	-0.304533	-0.347101	-0.219398	-0.261965	-0.347101	-0.347101	-0.347101	-0.304533	-0.304533	-0.304533	-0.347101	-0.389669	-0.347101	-0.304533	-0.17683	-0.389669	-0.219398	-0.261965	-0.347101
EMR17003_20170612_S_11A	F		L	0.173342	0.0718162	0.122579	0.122579	0.0210535	0.376393	0.122579	0.274867	-0.181998	-0.0297093	-0.23276	-0.0804721	-0.0297093	-0.0804721	-0.0297093	-0.0804721	0.0718162	-0.0297093	0.0718162	0.122579	-0.0297093	-0.23276	-0.0804721	0.0718162	-0.131235	-0.0297093	-0.131235	0.122579	-0.181998	-0.23276	-0.0297093	0.0718162	-0.131235	0.0210535	-0.181998	-0.0297093	-0.283523	-0.0804721	-0.0297093	-0.131235
EMR17003_20170612_S_13A	F	X	R	-0.0523859	0.12147	-0.110338	-0.226242	0.005566	-0.110338	0.237374	-0.0523859	0.005566	-0.0523859	-0.342145	-0.284193	-0.226242	-0.16829	-0.0523859	-0.226242	-0.110338	0.12147	-0.110338	-0.16829	-0.16829	-0.110338	0.005566	0.005566	0.12147	0.0635179	0.353277	0.179422	0.005566	0.12147	0.0635179	0.295325	0.0635179	0.469181	0.527133	0.237374	0.179422	0.12147	0.353277	0.179422
EMR17003_20170612_S_17A	F	X	L	-0.0263228	-0.0693433	0.0166976	-0.0263228	0.145759	0.145759	-0.0263228	0.0597181	0.102739	0.317841	0.403882	0.317841	0.18878	0.102739	0.360862	0.274821	0.145759	0.662005	0.18878	0.446903	0.575964	0.575964	0.360862	0.2318	0.834087	0.0166976	0.102739	0.360862	0.18878	-0.0263228	0.0166976	0.274821	0.145759	0.0166976	0.0166976	0.18878	0.0597181	0.145759	-0.0263228	0.0597181
EMR17003_20170612_S_17B	F	X	L	0.448249	0.405852	0.448249	0.236262	0.490647	0.660237	0.490647	0.321057	0.193864	0.533044	1.08421	0.914622	0.914622	0.490647	0.914622	0.490647	0.95702	0.914622	0.872225	0.829827	0.95702	0.745032	0.660237	0.660237	0.321057	0.405852	0.236262	0.151467	0.0242741	0.363454	0.278659	0.193864	0.0666716	0.321057	-0.0181234	0.0666716	-0.0181234	-0.102918	-0.102918	-0.145316
EMR17003_20170612_S_17C	F	X	R	0.0504905	-0.0472355	0.148216	0.0504905	-0.0960985	0.0016275	-0.193824	0.245942	0.0504905	0.0504905	-0.0472355	-0.0472355	-0.242687	-0.0960985	-0.0960985	-0.0472355	-0.0472355	-0.242687	-0.144961	0.0016275	-0.0960985	-0.144961	-0.0960985	0.148216	-0.0960985	0.343668	0.0016275	-0.0472355	-0.242687	-0.29155	0.0016275	-0.242687	-0.0472355	-0.340413	0.0504905	-0.0472355	-0.0472355	-0.193824	0.0016275	-0.0472355
EMR17003_20170612_S_19A	F	X	L	0.0305955	0.160461	-0.0992699	-0.164203	0.0305955	0.0305955	-0.164203	-0.0992699	-0.229135	-0.0343372	0.290326	0.225394	0.0955282	-0.0343372	0.160461	0.0955282	0.0955282	0.225394	0.290326	0.355259	0.0955282	-0.0343372	-0.0343372	0.0955282	0.290326	-0.0992699	0.160461	0.0955282	-0.164203	0.0955282	0.0305955	0.160461	0.0955282	-0.0343372	0.0955282	0.290326	0.225394	-0.164203	-0.0992699	-0.0343372
EMR17003_20170612_S_21A	F	X	L	-0.14158	-0.14158	-0.0763356	-0.272068	-0.206824	-0.14158	0.0541525	-0.14158	-0.14158	-0.0763356	-0.0110916	0.184641	0.249885	0.510861	0.249885	0.119397	-0.0763356	0.184641	0.0541525	0.249885	0.0541525	-0.0763356	-0.14158	-0.0110916	0.119397	-0.0110916	0.0541525	-0.0110916	-0.272068	0.0541525	-0.0110916	0.119397	-0.14158	0.119397	0.119397	-0.0763356	0.0541525	-0.14158	-0.0110916	-0.206824
EMR17003_20170612_S_21B	F	X	R	-0.152873	-0.198172	-0.152873	-0.198172	-0.288768	-0.288768	0.0736181	-0.288768	-0.24347	-0.0622768	-0.0622768	-0.198172	-0.288768	-0.288768	-0.198172	-0.107575	-0.152873	-0.24347	-0.198172	-0.24347	-0.198172	-0.0622768	-0.288768	-0.198172	-0.288768	-0.24347	-0.0622768	-0.334067	-0.198172	-0.107575	-0.152873	-0.152873	-0.24347	-0.288768	-0.288768	-0.0169785	-0.198172	-0.24347	-0.24347	-0.198172
EMR17003_20170612_S_23A	F	X	R	-0.1632	0.220449	-0.00974018	-0.0864699	-0.1632	-0.1632	-0.1632	-0.00974018	-0.0864699	-0.1632	-0.1632	-0.0864699	-0.239929	-0.239929	-0.239929	-0.239929	-0.00974018	-0.239929	-0.239929	-0.1632	-0.1632	-0.239929	-0.00974018	-0.1632	-0.239929	-0.239929	-0.1632	-0.1632	-0.00974018	-0.1632	-0.1632	-0.1632	-0.0864699	-0.00974018	0.0669896	0.297179	0.373909	0.0669896	0.757557	0.297179
EMR17003_20170612_S_23B	F	X	L	-0.0548233	-0.260191	-0.191735	-0.123279	-0.123279	-0.191735	-0.191735	-0.260191	-0.260191	-0.260191	-0.260191	-0.260191	-0.260191	-0.191735	-0.260191	-0.191735	-0.123279	-0.191735	-0.260191	-0.123279	-0.260191	-0.191735	-0.0548233	-0.123279	-0.123279	-0.123279	-0.191735	-0.191735	-0.260191	-0.260191	-0.260191	-0.260191	-0.260191	-0.260191	-0.260191	-0.191735	-0.191735	-0.191735	-0.191735	-0.123279
EMR17003_20170612_S_25A	F	X	L	-0.332979	-0.17511	-0.372446	-0.254044	-0.0961757	0.0616929	-0.214577	-0.0172414	-0.0567086	0.0616929	-0.0961757	0.0616929	0.0616929	-0.0961757	-0.0961757	-0.17511	-0.0567086	-0.0961757	-0.214577	-0.0961757	-0.0567086	-0.17511	-0.332979	0.0222257	-0.254044	-0.214577	-0.411913	-0.214577	-0.254044	-0.0567086	-0.293511	-0.372446	-0.45138	-0.254044	-0.372446	-0.411913	-0.411913	-0.293511	-0.411913	-0.411913
EMR17003_20170612_S_25B	F			-0.19885	-0.113673	-0.0284953	-0.113673	-0.113673	-0.113673	-0.19885	-0.19885	0.0566821	-0.19885	-0.0284953	-0.19885	-0.0284953	0.141859	-0.113673	-0.19885	-0.19885	-0.19885	-0.19885	0.0566821	-0.113673	-0.0284953	-0.113673	-0.0284953	-0.19885	-0.19885	-0.113673	-0.19885	-0.113673	-0.113673	-0.113673	-0.113673	-0.0284953	-0.113673	-0.19885	-0.19885	-0.19885	-0.113673	-0.113673	-0.0284953
EMR17003_20170612_S_27A	F		R	-0.185474	0.0180709	0.221616	0.221616	-0.0837016	-0.185474	-0.0837016	-0.0837016	0.0180709	-0.185474	-0.185474	-0.185474	-0.185474	-0.0837016	-0.185474	-0.0837016	-0.0837016	-0.0837016	-0.0837016	0.0180709	-0.185474	0.221616	-0.0837016	-0.0837016	0.221616	-0.185474	0.221616	-0.0837016	0.0180709	0.119843	0.221616	0.0180709	0.0180709	0.119843	0.0180709	0.0180709	0.0180709	-0.0837016	-0.185474	-0.185474
EMR17003_20170612_S_29A	F	X	L	-0.0902365	0.0742857	-0.0902365	0.0742857	-0.0628161	0.156547	0.019445	-0.0353958	0.0468653	-0.172498	-0.0628161	-0.0353958	0.183967	0.266228	0.211388	0.293649	0.321069	0.513012	0.595273	0.650114	0.458171	0.732375	0.540432	0.704954	0.979158	1.11626	1.3082	1.28078	1.28078	1.4453	1.63725	1.36304	1.69209	1.36304	1.52757	1.55499	0.951738	1.74693	1.58241	1.4453
EMR17004_20170807_S_03A	F		L	-0.310682	-0.221723	-0.310682	-0.310682	-0.221723	-0.310682	-0.266203	-0.266203	-0.177243	-0.310682	-0.310682	-0.0882835	-0.132763	0.000676011	0.000676011	0.000676011	0.223075	0.0451558	0.0896356	0.356514	0.000676011	0.000676011	0.267555	0.356514	0.400994	0.178595	0.756832	0.489953	0.801312	0.712352	0.667873	0.801312	0.667873	0.489953	0.667873	0.890271	0.534433	0.667873	0.712352	0.578913
EMR17004_20170807_S_03B	F	X	R	-0.0809791	0.28158	0.160727	0.100301	0.221154	0.342007	0.0398741	0.160727	-0.201832	-0.0809791	0.46286	0.342007	0.402433	0.221154	0.221154	0.221154	0.342007	0.342007	0.0398741	0.0398741	0.46286	0.583713	0.28158	0.221154	0.221154	0.28158	0.100301	0.28158	0.160727	0.100301	0.100301	0.0398741	-0.0205525	-0.0205525	0.0398741	-0.262259	-0.0809791	-0.201832	-0.201832	0.0398741
EMR17004_20170807_S_07A	F	X		0.219466	-0.0323605	-0.0323605	-0.158274	-0.0323605	-0.0323605	-0.0323605	-0.158274	-0.0323605	0.0935527	0.0935527	-0.158274	-0.0323605	0.219466	0.0935527	0.0935527	0.0935527	0.0935527	0.0935527	0.345379	-0.158274	-0.0323605	-0.0323605	-0.158274	-0.158274	0.219466	-0.158274	-0.158274	-0.158274	-0.158274	-0.0323605	-0.158274	-0.158274	-0.158274	-0.0323605	-0.0323605	-0.0323605	0.0935527	-0.0323605	-0.0323605
EMR17004_20170807_S_09A	F	X	R	-0.298835	-0.244193	-0.0802652	-0.134908	-0.0802652	-0.0256227	-0.353478	-0.0256227	-0.0802652	-0.0256227	0.0290199	0.0836624	-0.0256227	-0.244193	-0.18955	0.0836624	0.0836624	-0.134908	0.0290199	-0.0256227	-0.18955	-0.0802652	-0.0802652	0.138305	-0.134908	-0.18955	-0.18955	-0.244193	-0.18955	-0.134908	-0.134908	-0.244193	-0.298835	-0.18955	-0.134908	0.138305	-0.244193	-0.244193	-0.0256227	0.0290199
EMR17004_20170807_S_11A	F	X	L	0.0529937	0.141348	0.0529937	0.0529937	0.185525	0.185525	0.185525	0.406412	0.27388	0.0529937	0.0971709	-0.256247	-0.167893	-0.0353609	-0.21207	-0.0353609	-0.0795381	-0.21207	-0.256247	-0.21207	-0.344602	-0.21207	-0.300424	-0.300424	-0.300424	-0.388779	-0.0795381	-0.21207	-0.167893	-0.0795381	-0.300424	-0.123715	-0.167893	-0.21207	-0.21207	-0.256247	-0.21207	-0.344602	-0.388779	-0.300424
EMR17004_20170807_S_17A	F	X	L	0.2251	0.2251	0.0255037	0.0255037	0.111045	-0.0600377	-0.00301008	-0.0885515	0.0540175	0.0540175	0.111045	0.2251	0.168073	0.0825313	0.396183	0.139559	0.2251	0.0540175	0.139559	-0.00301008	0.0540175	-0.117065	0.0540175	-0.316662	-0.0600377	-0.0600377	-0.202607	-0.23112	-0.23112	-0.316662	-0.174093	-0.316662	-0.23112	-0.373689	-0.288148	-0.259634	-0.174093	-0.0600377	-0.23112	-0.202607
EMR17006_20170615_S_01A	M	X	R	0.330808	0.178628	-0.125732	0.711259	0.559079	0.406898	0.787349	0.406898	0.559079	0.559079	0.863439	0.406898	0.178628	0.102538	0.330808	-0.049642	0.635169	0.330808	0.0264481	-0.049642	0.330808	0.178628	0.102538	0.178628	0.102538	0.635169	0.559079	0.254718	0.178628	0.254718	0.635169	0.102538	0.330808	0.102538	0.406898	0.482989	0.406898	0.178628	0.178628	0.406898
EMR17006_20170615_S_03A	M		L	0.107416	-0.0746035	-0.256623	-0.19595	-0.0139305	-0.0746035	-0.0746035	-0.19595	-0.317296	-0.0746035	-0.256623	-0.256623	-0.135277	-0.0746035	-0.0139305	-0.19595	-0.19595	-0.0139305	-0.135277	-0.377969	-0.256623	-0.0139305	-0.256623	0.0467426	-0.256623	-0.135277	-0.0139305	-0.135277	-0.135277	-0.0746035	-0.0139305	-0.19595	-0.19595	-0.19595	0.228762	-0.0746035	-0.19595	-0.0139305	-0.135277	-0.0139305
EMR17006_20170615_S_05A	M	X	R	-0.510527	-0.474285	-0.510527	-0.546769	-0.546769	-0.546769	-0.546769	-0.546769	-0.546769	-0.510527	-0.546769	-0.546769	-0.546769	-0.546769	-0.546769	-0.546769	-0.546769	-0.546769	-0.546769	-0.546769	-0.510527	-0.474285	-0.510527	-0.36556	-0.329318	-0.401802	-0.401802	-0.36556	-0.438043	-0.220592	-0.293076	-0.220592	-0.36556	-0.220592	-0.36556	-0.329318	-0.329318	-0.36556	-0.293076	-0.36556
EMR17006_20170615_S_07A	M		L	-0.211686	-0.0934349	0.143067	0.0248159	-0.211686	-0.211686	-0.211686	-0.0934349	-0.211686	-0.211686	-0.211686	-0.211686	-0.0934349	0.143067	-0.0934349	0.0248159	-0.211686	-0.211686	-0.211686	-0.211686	-0.211686	-0.0934349	-0.211686	-0.0934349	0.0248159	-0.211686	-0.211686	0.0248159	0.143067	-0.211686	-0.211686	0.143067	-0.211686	-0.0934349	-0.211686	-0.211686	-0.0934349	-0.211686	-0.211686	-0.0934349
EMR17006_20170615_S_09A	M	X	R	1.2161	0.871601	1.15868	0.527106	0.699354	0.584522	0.354858	0.46969	0.412274	0.297442	0.125195	0.297442	-0.0470532	0.354858	0.354858	0.297442	0.46969	0.871601	0.871601	0.814185	1.15868	1.61801	1.04385	1.84767	1.2161	1.73284	1.50318	1.2161	1.2161	1.44576	1.10126	1.15868	0.699354	0.929017	0.986433	0.929017	0.814185	0.354858	0.986433	0.584522
EMR17006_20170615_S_09B	M		R	0.251569	0.319365	0.319365	0.183774	-0.0874069	0.115979	0.115979	-0.155202	-0.290793	-0.155202	-0.222997	-0.222997	-0.358588	-0.358588	-0.0874069	-0.290793	-0.290793	-0.290793	-0.290793	-0.290793	-0.222997	-0.155202	0.251569	-0.222997	-0.0196116	0.0481836	-0.0874069	0.115979	0.319365	0.183774	0.726136	0.319365	0.183774	0.319365	-0.0196116	0.251569	0.183774	0.115979	0.38716	0.251569
EMR17006_20170615_S_11A	M		L	-0.0586416	0.119048	-0.117871	0.119048	-0.177101	-0.236331	-0.295561	-0.0586416	-0.0586416	-0.117871	0.000588157	0.178277	-0.295561	-0.295561	-0.0586416	-0.177101	-0.177101	-0.117871	-0.236331	-0.236331	-0.0586416	-0.295561	-0.295561	-0.177101	-0.177101	-0.117871	-0.117871	-0.295561	0.296737	-0.0586416	-0.117871	-0.177101	-0.117871	-0.177101	-0.117871	-0.236331	-0.117871	-0.236331	-0.177101	-0.0586416
EMR17006_20170615_S_11B	M	X	R	-0.0699349	-0.214015	0.122171	-0.262041	0.170198	0.0741449	0.122171	0.698491	0.170198	0.84257	0.506384	0.746517	0.554411	0.410331	0.746517	0.122171	0.0741449	0.170198	0.122171	-0.0699349	-0.262041	-0.358094	-0.358094	-0.406121	-0.310068	-0.310068	-0.310068	-0.310068	-0.310068	-0.310068	-0.406121	-0.406121	-0.358094	-0.454148	-0.502174	-0.502174	-0.165988	-0.358094	-0.165988	-0.262041
EMR17006_20170615_S_11C	M		L	-0.12514	-0.202609	-0.12514	-0.202609	-0.12514	-0.12514	-0.202609	-0.12514	-0.0476708	-0.202609	-0.12514	-0.12514	-0.0476708	-0.12514	-0.12514	0.0297982	-0.202609	-0.202609	-0.202609	-0.12514	-0.0476708	-0.0476708	0.262205	0.0297982	-0.0476708	-0.12514	-0.202609	-0.202609	-0.202609	-0.202609	-0.202609	-0.202609	-0.202609	-0.202609	-0.202609	-0.202609	-0.202609	-0.12514	-0.202609	-0.0476708
EMR17006_20170615_S_11D	M			-0.111663	-0.111663	-0.111663	-0.111663	-0.111663	-0.111663	-0.111663	-0.111663	-0.111663	-0.111663	-0.111663	-0.111663	-0.111663	-0.111663	-0.111663	-0.111663	-0.111663	-0.111663	-0.111663	-0.111663	-0.111663	-0.111663	-0.111663	-0.111663	-0.111663	-0.111663	-0.111663	-0.111663	-0.111663	-0.111663	-0.111663	-0.111663	-0.111663	-0.111663	-0.111663	-0.111663	-0.111663	-0.111663	-0.111663	-0.111663
EMR17006_20170615_S_13A	M	X	L	0.365471	0.478742	0.74304	0.13893	0.289957	0.478742	0.667526	0.478742	0.252201	0.214444	0.0634161	-0.200882	-0.200882	0.176687	0.101173	0.289957	0.289957	0.289957	0.629769	0.554256	0.403228	1.0451	0.629769	0.629769	0.440985	0.365471	0.440985	0.101173	0.440985	0.440985	0.629769	0.365471	0.780797	0.289957	0.554256	0.289957	0.327714	0.176687	0.403228	0.0634161
EMR17006_20170615_S_15A	M	X	L	-0.0262562	0.204124	-0.193806	-0.361355	-0.298524	-0.361355	-0.340411	-0.172862	0.0575185	0.246012	-0.0471999	0.0575185	0.12035	-0.0681436	0.141293	0.183181	0.204124	0.434505	0.266955	0.204124	0.266955	0.476392	0.287899	0.204124	0.0365748	0.204124	0.0156311	0.266955	0.0994058	0.183181	0.183181	-0.0471999	0.0994058	0.204124	0.287899	0.12035	0.0156311	0.141293	-0.256637	0.246012
EMR17006_20170615_S_15B	M	X	L	0.0727272	-0.0266816	0.172136	0.139	0.304681	0.569771	0.93427	0.801725	0.901134	1.39818	1.96149	1.03368	0.66918	0.40409	0.105863	0.271545	0.105863	-0.12609	-0.258635	0.0727272	0.00645465	-0.0266816	-0.192363	-0.0929541	0.139	0.437226	0.172136	0.470362	0.271545	0.238409	-0.0266816	0.503499	0.702316	0.304681	-0.0929541	0.238409	0.40409	0.172136	0.172136	-0.0598179
EMR17006_20170615_S_17A	M	X	R	0.662078	0.113275	0.628817	1.14436	0.479144	0.362731	0.545665	0.31284	0.146536	-0.202702	-0.0696588	-0.10292	-0.10292	-0.219332	-0.11955	-0.0696588	0.346101	0.362731	0.213058	-0.0862891	0.0633842	-0.13618	0.229688	0.0467539	-0.0696588	-0.202702	-0.152811	0.113275	0.0134931	0.0633842	-0.0530284	-0.202702	-0.0197676	0.229688	-0.0530284	0.479144	0.29621	0.129906	0.32947	0.0134931
EMR17006_20170615_S_17B	M	X	L	0.419023	0.464767	0.0988113	-0.175656	-0.2214	-0.267145	-0.404378	-0.312889	-0.358634	-0.404378	-0.495867	-0.2214	0.0988113	0.236045	0.602001	0.69349	0.281789	0.876468	1.05945	0.510512	0.419023	0.236045	-0.0841667	-0.267145	-0.312889	-0.358634	-0.312889	-0.312889	-0.2214	-0.312889	-0.0841667	-0.175656	-0.404378	-0.2214	-0.404378	-0.267145	-0.450123	-0.358634	-0.358634	-0.358634
EMR17006_20170615_S_23A	M	X	L	0.308983	0.605103	0.497423	0.524343	0.120542	0.362823	0.685863	0.578183	0.362823	0.470503	0.308983	0.335903	0.201302	0.416663	0.416663	0.389743	-0.0678979	0.0397822	-0.175578	-0.148658	-0.579379	-0.0678979	-0.148658	-0.229418	-0.390938	-0.337098	-0.0678979	-0.0678979	-0.229418	-0.0409779	0.120542	-0.094818	-0.256338	-0.283258	-0.202498	0.0128622	0.0936222	-0.202498	-0.0678979	0.0128622
EMR17006_20170615_S_25A	M	X	L	0.0473476	0.464542	0.702939	0.881736	1.00093	1.17973	1.35853	0.64334	1.17973	3.3253	2.19292	1.12013	0.58374	0.822137	1.12013	0.822137	0.524141	0.166546	0.345344	0.226145	0.0473476	0.0473476	-0.250648	-0.310248	-0.13145	-0.310248	-0.310248	-0.310248	-0.310248	-0.191049	-0.310248	-0.13145	-0.369847	-0.369847	-0.310248	-0.369847	-0.191049	-0.250648	-0.13145	-0.369847
EMR17006_20170615_S_27A	M	X	R	0.118693	0.087337	0.087337	-0.383009	-0.28894	-0.00673212	-0.132158	-0.226227	0.0559806	-0.100801	-0.132158	-0.163514	-0.132158	-0.19487	-0.351652	-0.0694449	-0.163514	-0.0694449	-0.132158	-0.226227	-0.320296	-0.351652	-0.445721	-0.414365	-0.100801	-0.226227	-0.383009	-0.163514	-0.132158	-0.383009	-0.0694449	-0.257583	-0.226227	-0.414365	-0.257583	-0.320296	-0.28894	-0.100801	-0.320296	-0.351652
EMR17006_20170615_S_27B	M	X	L	-0.196439	-0.228488	-0.420784	-0.484882	-0.484882	-0.548981	-0.58103	-0.484882	-0.484882	-0.260538	-0.356685	-0.260538	-0.356685	-0.484882	-0.452833	-0.292587	-0.292587	-0.452833	-0.516931	-0.420784	-0.388734	-0.452833	-0.58103	-0.548981	-0.645128	-0.613079	-0.645128	-0.645128	-0.613079	-0.58103	-0.645128	-0.613079	-0.613079	-0.613079	-0.516931	-0.613079	-0.58103	-0.613079	-0.548981	-0.613079
EMR17006_20170615_S_31A	M	X	L	0.431666	0.378382	0.165249	-0.101169	-0.0478851	0.0586817	-0.0478851	0.325099	0.0586817	0.751366	0.0586817	-0.0478851	-0.261019	-0.101169	0.00539831	0.698083	0.0586817	0.325099	0.0586817	0.325099	0.325099	0.751366	-0.154452	0.165249	0.271815	0.111965	-0.101169	0.378382	0.00539831	0.218532	-0.0478851	0.00539831	-0.154452	-0.101169	0.00539831	-0.154452	-0.101169	0.111965	0.00539831	0.00539831
EMR17007_20170614_S_01A	M		R	0.0842935	0.00464262	0.195805	-0.0909384	0.036503	0.0205728	-0.0909384	0.0205728	-0.0431479	0.00464262	0.0205728	-0.0750082	-0.106869	-0.186519	-0.329891	-0.26617	-0.2821	-0.21838	-0.25024	-0.0590781	0.163944	-0.0112875	-0.0112875	-0.154659	-0.170589	-0.0909384	-0.0909384	0.0842935	-0.122799	0.0524331	0.211735	-0.0112875	0.0842935	0.0524331	-0.0431479	0.0205728	-0.0750082	-0.154659	-0.154659	0.00464262
EMR17007_20170614_S_01B	M		L	-0.123317	-0.123317	-0.0571119	0.0752984	-0.123317	0.141504	0.00909325	-0.0571119	0.00909325	0.207709	0.0752984	0.207709	0.207709	0.00909325	-0.0571119	-0.123317	-0.123317	-0.123317	-0.0571119	0.00909325	0.141504	0.00909325	-0.0571119	-0.0571119	-0.123317	-0.123317	-0.0571119	-0.0571119	-0.123317	-0.0571119	-0.0571119	-0.123317	-0.0571119	-0.123317	0.00909325	0.00909325	-0.0571119	-0.123317	-0.0571119	-0.0571119
EMR17007_20170614_S_03A	M	X	L	-0.00471786	0.14076	0.270073	-0.214852	0.0276105	-0.231016	-0.00471786	-0.408823	-0.247181	-0.392658	-0.344166	-0.311837	-0.247181	-0.376494	-0.392658	-0.134031	-0.0370462	-0.0855388	0.0114463	0.108431	0.0599389	-0.0532104	-0.0208821	-0.0370462	-0.263345	-0.117867	-0.134031	-0.214852	-0.16636	-0.0370462	-0.408823	-0.263345	-0.328002	-0.295673	-0.424987	-0.36033	-0.36033	-0.489643	-0.344166	-0.263345
EMR17007_20170614_S_03B	M	X	L	0.197932	0.155181	-0.0585771	0.00555025	0.0910533	0.0910533	0.176556	0.26206	0.26206	0.176556	0.176556	0.0910533	-0.101329	0.026926	-0.208207	0.0483018	-0.208207	-0.250959	-0.122704	-0.165456	-0.250959	-0.250959	-0.250959	-0.250959	-0.250959	-0.165456	-0.208207	-0.0799528	-0.165456	-0.0585771	-0.0372013	0.176556	-0.0799528	0.133805	0.197932	0.112429	0.197932	0.283435	0.112429	-0.0585771
EMR17007_20170614_S_05A	M		L	-0.0340662	-0.151767	-0.151767	-0.0929164	0.0247841	0.142485	-0.0340662	-0.0340662	0.0836344	0.142485	0.142485	0.0836344	-0.0340662	0.0247841	-0.0340662	0.319035	0.201335	0.0836344	-0.0340662	-0.151767	-0.210617	-0.151767	-0.210617	-0.0929164	-0.210617	-0.0340662	-0.151767	-0.0340662	-0.151767	-0.0929164	-0.0340662	-0.210617	0.201335	-0.0929164	-0.151767	-0.151767	-0.0929164	-0.0340662	0.0836344	0.260185
EMR17007_20170614_S_07A	M	X	R	0.839179	1.26782	1.20478	1.20478	0.940036	1.07871	0.927428	1.01568	0.284467	0.284467	-0.11896	-0.257638	-0.446745	-0.459352	-0.446745	-0.358495	-0.131567	-0.232424	-0.169389	-0.144175	-0.219817	-0.0937462	0.18361	0.297074	0.612251	0.57443	0.48618	0.813965	0.612251	0.914821	0.839179	0.902214	0.738322	0.675287	0.687894	0.700501	0.536609	0.158396	0.0575389	0.196217
EMR17007_20170614_S_09A	M	X	R	-0.290018	-0.205724	-0.0371359	-0.233822	0.0190602	-0.177626	-0.12143	0.131452	-0.0652339	-0.0652339	-0.205724	-0.0652339	-0.318116	-0.205724	-0.177626	-0.177626	-0.149528	-0.318116	-0.26192	-0.205724	-0.233822	-0.26192	-0.26192	-0.205724	-0.26192	-0.26192	-0.149528	-0.149528	-0.177626	-0.12143	-0.00903787	0.15955	-0.093332	-0.00903787	0.0471582	0.103354	0.0471582	-0.149528	-0.12143	-0.00903787
EMR17007_20170614_S_09B	M		R	-0.0359642	-0.11088	-0.140847	-0.230746	-0.20078	-0.15583	-0.0659307	-0.0359642	-0.0958971	-0.00599775	-0.0809139	-0.20078	-0.230746	-0.20078	-0.260713	-0.185796	-0.230746	-0.245729	-0.140847	-0.20078	-0.125864	-0.140847	0.293667	0.233734	0.00898547	0.368583	0.0239687	-0.0958971	-0.0659307	-0.0359642	-0.020981	-0.15583	0.00898547	-0.0659307	-0.020981	-0.11088	-0.0809139	-0.11088	-0.125864	-0.11088
EMR17007_20170614_S_11A	M	X	R	-0.0509059	0.0014176	-0.155553	-0.0247441	0.236873	-0.0770676	-0.0247441	0.367682	0.393844	-0.155553	-0.207876	-0.286362	-0.155553	-0.312523	-0.234038	-0.286362	-0.181715	-0.234038	-0.103229	0.158388	0.0537411	-0.0509059	-0.0770676	-0.103229	-0.129391	-0.0247441	0.0275793	0.0799028	0.0014176	0.367682	0.655461	0.498491	0.78627	0.550814	0.472329	0.367682	0.132226	0.0537411	-0.0247441	-0.0247441
EMR17007_20170614_S_11B	M		L	-0.145953	-0.0816005	-0.0816005	-0.0816005	-0.0816005	-0.0816005	-0.145953	0.0471044	-0.0816005	-0.145953	-0.145953	-0.145953	-0.0816005	-0.0816005	-0.017248	-0.017248	-0.017248	-0.0816005	-0.145953	-0.145953	-0.145953	-0.0816005	-0.0816005	-0.145953	-0.017248	-0.145953	-0.145953	-0.0816005	-0.0816005	0.0471044	-0.017248	0.175809	-0.017248	0.111457	0.0471044	0.111457	0.175809	-0.145953	-0.017248	-0.0816005
EMR17007_20170614_S_17A	M	X	L	-0.0533931	0.0826909	0.116712	0.184754	0.0826909	0.0826909	0.116712	-0.121435	0.218775	-0.189477	-0.189477	-0.0193721	-0.0193721	-0.223498	-0.155456	-0.0533931	0.0146489	0.218775	0.116712	0.116712	-0.121435	-0.0874141	-0.0874141	-0.121435	-0.223498	-0.0533931	-0.0874141	-0.257519	0.184754	0.116712	0.0146489	0.116712	0.0146489	-0.121435	-0.0193721	-0.0874141	-0.0874141	-0.0193721	0.0146489	-0.155456
EMR17007_20170614_S_17B	M		R	0.09484	0.0386928	0.179061	-0.0174544	-0.129749	-0.185896	-0.21397	-0.101675	-0.0736016	-0.157822	-0.298191	-0.298191	-0.157822	-0.21397	-0.185896	-0.157822	-0.101675	0.0386928	-0.101675	-0.129749	0.122914	-0.129749	-0.185896	-0.270117	-0.129749	-0.129749	-0.21397	-0.185896	-0.21397	-0.101675	-0.045528	0.0106192	-0.101675	-0.101675	0.0106192	-0.101675	-0.185896	-0.157822	-0.157822	-0.045528
EMR17007_20170614_S_23A	M	X	R	0.148955	-0.134373	-0.00641861	0.203793	0.075838	0.185514	0.240351	0.258631	0.148955	0.441423	0.51454	0.569378	0.551099	0.551099	0.350027	0.231212	0.26777	0.432284	0.615076	0.615076	0.578518	0.51454	0.249491	0.295189	0.112397	-0.0155582	-0.20749	-0.0338375	-0.152653	-0.0978149	0.00272102	0.148955	0.27691	0.167234	0.0849777	0.167234	0.130676	0.0575588	0.0118607	-0.143513
EMR17007_20170614_S_23B	M	X	R	-0.219919	-0.0825064	-0.0710553	-0.391684	-0.242821	-0.105408	-0.116859	-0.197017	-0.151212	-0.151212	-0.0138002	0.0892589	-0.0825064	-0.162663	-0.116859	-0.00234922	0.0320038	0.169416	0.112161	-0.0596043	-0.0367023	-0.0367023	-0.0825064	0.169416	0.157965	-0.0367023	0.0892589	-0.277174	-0.219919	-0.00234922	-0.254272	-0.254272	-0.23137	-0.0367023	-0.00234922	-0.288625	-0.12831	-0.265723	-0.116859	0.0205528
EMR17007_20170614_S_27A	M	X	R	0.015166	0.1006	0.295878	1.02817	1.15022	1.27227	0.930532	1.1136	0.466746	0.173829	-0.180112	-0.082473	-0.253341	-0.106883	-0.143497	-0.0458584	0.00296113	0.137215	0.186034	0.283673	0.0273709	0.173829	0.0639855	0.14942	0.112805	0.0639855	0.527771	1.04038	1.24786	0.881712	1.6018	1.8581	1.51637	1.12581	1.16242	0.869507	0.723049	0.478951	0.1006	-0.0702681
EMR17007_20170614_S_27B	M		R	-0.127791	-0.0424425	-0.0424425	-0.127791	-0.0424425	-0.0424425	0.0855805	-0.0851168	0.000231829	-0.127791	-0.170465	-0.170465	-0.21314	-0.21314	-0.127791	-0.127791	-0.170465	-0.170465	-0.0424425	-0.127791	-0.21314	-0.127791	-0.0424425	-0.170465	-0.170465	-0.127791	-0.170465	-0.0424425	-0.127791	-0.127791	-0.0424425	0.000231829	0.0429062	-0.0424425	-0.0424425	-0.0851168	0.0855805	0.0429062	-0.127791	-0.0851168
EMR17008_20170629_S_01A	M	X	R	0.311116	0.20061	0.0164347	0.20061	0.237445	-0.038818	-0.0204004	-0.038818	-0.0756531	-0.351916	-0.62818	-0.241411	-0.112488	-0.204576	0.0901049	-0.0572355	0.27428	0.20061	0.219028	0.27428	0.532126	0.476873	0.366368	0.237445	0.495291	0.679467	0.440038	0.642631	0.366368	0.311116	0.347951	0.20061	0.0716873	0.0164347	-0.038818	0.0348522	-0.0756531	0.0532698	0.0716873	0.108522
EMR17008_20170629_S_01B	M	X	L	-0.219108	-0.10586	-0.0775484	-0.0492364	0.318819	0.828434	0.885058	1.19649	1.30974	2.04585	3.37651	2.13078	1.30974	0.77181	0.63025	0.262195	0.177259	0.0923233	0.148947	-0.10586	0.00738747	-0.134172	-0.134172	-0.134172	-0.332356	-0.219108	-0.0209245	-0.219108	-0.0775484	-0.134172	-0.24742	-0.219108	-0.0209245	0.0356994	-0.0775484	0.177259	0.0923233	-0.0775484	0.0923233	-0.0775484
EMR17008_20170629_S_01C	M	X	L	0.313715	0.214652	0.239417	0.0660561	0.239417	0.115588	0.0660561	0.0412902	-0.0825393	-0.231135	-0.354964	-0.107305	-0.132071	0.313715	0.313715	0.561374	0.734736	0.883331	0.809033	1.08146	0.858565	0.883331	0.957629	0.635672	0.214652	0.363247	-0.0825393	0.140354	-0.156837	0.0412902	-0.107305	-0.132071	-0.255901	-0.206369	-0.107305	-0.206369	-0.280667	-0.206369	-0.255901	0.0165243
EMR17008_20170629_S_01D	M	X	L	0.00241371	0.0289448	-0.0771797	-0.342491	-0.0241174	-0.0241174	-0.130242	-0.289429	-0.130242	-0.183304	-0.0241174	0.214663	0.0289448	0.0820071	-0.0771797	0.1616	-0.0506485	-0.103711	0.0289448	0.0820071	0.267725	-0.0506485	-0.130242	-0.209835	0.0289448	0.00241371	-0.31596	-0.209835	-0.0771797	-0.236366	-0.156773	0.00241371	-0.103711	0.00241371	-0.262898	0.214663	-0.130242	0.188132	0.0820071	-0.0241174
EMR17008_20170629_S_03A	M		L	-0.101472	0.169788	0.156871	0.00186495	0.0406165	0.0276993	0.286043	0.105202	0.337711	0.311877	0.350628	0.363546	0.0922851	-0.0756381	-0.178975	-0.333981	-0.579408	-0.217727	-0.346899	-0.0756381	0.105202	0.00186495	-0.0368866	-0.0110522	0.131037	-0.217727	-0.269396	-0.256478	-0.127307	-0.0110522	0.079368	0.156871	0.156871	0.143954	0.105202	0.38938	-0.0498037	0.0664508	0.143954	0.00186495
EMR17008_20170629_S_05A	M	X	L	-0.410343	-0.338158	-0.290034	-0.434405	-0.169725	-0.410343	-0.386281	-0.145663	0.0468321	-0.0494153	0.67244	0.768688	0.79275	0.79275	0.431822	0.816812	0.552131	0.263389	0.263389	-0.0253534	-0.0253534	-0.265972	-0.24191	-0.386281	-0.265972	-0.338158	-0.097539	-0.338158	-0.482529	-0.338158	-0.290034	-0.097539	-0.314096	-0.145663	-0.0253534	-0.0734771	-0.00129158	0.383698	0.287451	0.070894
EMR17008_20170629_S_09A	M	X	L	0.42767	0.10486	0.0779593	0.0779593	-0.00274316	-0.137247	-0.164148	-0.191049	-0.271751	0.266265	0.0779593	-0.191049	0.0510585	-0.0565448	0.239364	0.0510585	-0.110346	0.158662	0.0510585	0.158662	0.212463	0.42767	0.266265	0.0510585	0.185563	0.42767	0.293166	0.293166	0.212463	0.185563	0.239364	-0.0834456	0.0779593	-0.029644	-0.0834456	-0.029644	-0.0834456	0.0510585	-0.029644	-0.24485
EMR17008_20170629_S_11A	M	X	L	0.0751829	0.117307	0.096245	-0.0722516	-0.00906541	-0.0511896	-0.135438	-0.240748	-0.198624	-0.177562	-0.0301275	0.791294	2.2867	3.27662	3.63467	4.22441	4.4561	4.47716	3.48724	2.39201	1.44422	1.0651	0.770232	0.391114	0.180493	0.096245	-0.00906541	-0.135438	-0.114376	-0.198624	-0.0933137	-0.114376	-0.114376	-0.0933137	-0.0933137	-0.0933137	-0.0722516	-0.0301275	0.138369	-0.0301275
EMR17008_20170629_S_11B	M	X	R	0.256436	-0.181735	-0.181735	0.0572676	-0.0622336	-0.102067	-0.0223999	-0.141901	-0.221569	0.734441	0.0572676	-0.141901	-0.181735	-0.0223999	-0.0622336	0.256436	-0.261402	-0.181735	0.0572676	-0.0223999	-0.0622336	0.216603	0.375938	0.216603	0.256436	0.29627	0.29627	0.415771	0.136935	-0.0622336	-0.0223999	-0.141901	-0.102067	0.0174339	-0.181735	-0.102067	-0.141901	0.256436	-0.141901	-0.0622336
EMR17008_20170629_S_11C	M	X	R	0.0980485	0.030125	-0.0717603	-0.173646	-0.139684	-0.309493	-0.0377986	-0.241569	-0.105722	-0.0377986	0.030125	-0.343454	-0.105722	-0.0717603	-0.173646	-0.00383679	-0.0717603	0.13201	-0.139684	-0.0377986	0.0980485	-0.173646	0.030125	0.0980485	0.0640867	0.301819	0.233896	0.301819	0.0980485	0.199934	0.165972	0.199934	0.13201	-0.173646	-0.275531	-0.0717603	-0.275531	-0.207607	-0.207607	-0.275531
EMR17008_20170629_S_17A	M	X	R	0.296033	0.35884	0.296033	0.296033	0.379776	0.316969	0.0238695	0.0448051	-0.164551	-0.541393	-0.792621	-0.687943	-0.75075	-0.792621	-0.75075	-0.75075	-0.394844	0.0238695	-0.12268	0.484454	0.69381	0.526325	0.35884	0.149483	0.128548	-0.0598732	-0.12268	-0.101744	-0.248294	-0.290165	-0.436715	-0.436715	-0.26923	-0.352972	-0.0389375	-0.332037	-0.185487	-0.227358	-0.185487	-0.248294
EMR17008_20170629_S_17B	M		L	0.0929703	0.192362	0.266906	0.0681223	0.117818	-0.0561174	0.0929703	0.0432744	-0.130661	-0.354293	-0.304597	-0.105813	0.0681223	-0.180357	-0.0312695	-0.105813	-0.130661	-0.130661	-0.180357	0.167514	0.0929703	0.0432744	0.242058	0.167514	-0.00642153	0.142666	0.167514	0.117818	-0.00642153	0.0184264	0.0184264	0.0681223	-0.130661	-0.130661	-0.105813	-0.0312695	-0.205205	0.0681223	-0.329445	-0.205205
EMR17008_20170629_S_17C	M	X	R	0.0124678	0.0464224	0.0464224	0.216195	0.165264	0.233173	0.25015	0.148286	0.352014	0.572719	0.233173	-0.276146	-0.242192	-0.361033	-0.37801	-0.445919	-0.428942	-0.361033	-0.37801	-0.428942	-0.327078	-0.106373	0.0973543	-0.19126	-0.293124	-0.293124	-0.293124	-0.428942	-0.276146	-0.428942	-0.276146	-0.327078	-0.19126	0.0124678	-0.106373	0.080377	-0.00450951	0.080377	0.284105	0.233173
EMR17008_20170629_S_19A	M	X	R	-0.0224218	0.135239	-0.0224218	-0.270175	-0.180083	-0.15756	-0.15756	-0.135037	-0.270175	0.00010115	0.135239	0.51813	0.405515	0.428038	0.247854	0.315423	0.0226241	-0.0674678	0.0226241	-0.31522	0.00010115	-0.0449448	-0.0899907	0.00010115	0.00010115	0.112716	-0.112514	-0.0674678	0.090193	0.157762	0.157762	0.202808	0.00010115	0.112716	0.090193	0.090193	0.0226241	0.090193	0.0451471	0.090193
EMR17008_20170629_S_19B	M	X	L	0.536366	0.398809	0.519171	0.244057	-0.117031	-0.18581	-0.237394	-0.203004	-0.306172	-0.357756	-0.650066	-0.615676	-0.495314	-0.237394	0.00333157	0.0549156	0.433198	0.501977	0.33003	0.553561	0.0549156	-0.0826418	-0.203004	-0.0998364	-0.0998364	0.158084	-0.0998364	0.0205262	0.158084	-0.237394	-0.0138631	-0.0654471	-0.237394	-0.288978	-0.288978	-0.220199	-0.237394	-0.271783	-0.340562	-0.254588
EMR17008_20170629_S_19C	M		L	0.202477	0.101828	-0.0323711	-0.267219	-0.13302	-0.250444	-0.300769	-0.0659208	-0.20012	-0.149795	0.252802	0.0682781	-0.0155962	0.0179535	0.0682781	0.168927	0.135378	-0.049146	-0.16657	-0.20012	-0.116245	-0.049146	-0.149795	-0.283994	-0.317544	-0.0826957	-0.149795	-0.0659208	-0.0323711	-0.116245	0.0515032	-0.20012	0.0515032	-0.0826957	-0.0323711	-0.283994	-0.250444	0.00117863	0.00117863	-0.149795
EMR17008_20170629_S_21A	M	X	R	-0.167279	0.111062	-0.0281083	-0.0744985	0.0530744	-0.0744985	-0.202071	-0.236864	-0.376034	-0.700765	-1.0023	-0.828338	-0.781948	-1.0023	-0.967509	-0.886326	-0.67757	-0.364437	-0.434022	-0.213669	0.145855	0.16905	0.111062	-0.213669	-0.271657	-0.376034	-0.376034	-0.39923	-0.515205	-0.410827	-0.410827	-0.341242	-0.271657	-0.306449	0.0530744	0.00668428	0.0414769	-0.109291	0.134257	-0.0744985
EMR17008_20170629_S_21B	M	X	L	0.179798	-0.0231665	-0.203579	-0.248683	-0.293786	-0.406544	-0.248683	-0.158476	-0.203579	-0.113373	0.743588	0.969104	1.21717	0.833795	0.721037	0.653382	0.179798	-0.113373	-0.0908213	-0.203579	-0.00061487	0.20235	0.360211	0.427866	0.946553	1.19462	1.14952	1.32993	1.21717	1.35248	1.19462	1.30738	0.811243	0.901449	0.540624	0.337659	0.20235	0.315108	0.540624	0.292556
EMR17008_20170629_S_21C	M	X	R	0.220628	0.240922	0.0988618	0.261216	0.180039	0.504748	0.646808	0.849751	1.17446	2.29065	1.21505	1.23534	0.687396	0.788868	0.930928	0.667102	0.545336	0.525042	0.42357	0.687396	0.585925	0.504748	1.0324	0.910633	1.0121	1.19475	1.11358	1.21505	1.21505	0.707691	0.971516	0.849751	0.829456	0.42357	0.585925	0.382982	0.28151	0.545336	0.322099	0.301805
EMR17008_20170629_S_21D	M	X	R	-0.326501	-0.358266	-0.421797	-0.517093	-0.453562	-0.453562	-0.421797	-0.548858	-0.453562	-0.453562	-0.485328	-0.326501	-0.294736	-0.104144	-0.167675	0.0546825	-0.135909	0.0864478	0.118213	0.245274	0.467632	0.27704	0.245274	0.181744	-0.135909	-0.231205	-0.167675	-0.358266	-0.19944	-0.453562	-0.421797	-0.421797	-0.294736	-0.358266	-0.358266	-0.358266	-0.326501	-0.19944	-0.517093	-0.167675
EMR17008_20170629_S_23A	M	X	L	-0.212992	-0.11789	-0.193972	-0.174951	-0.0418085	-0.00376775	-0.0608289	-0.00376775	-0.0798493	-0.251033	-0.327114	-0.384175	-0.365155	-0.365155	-0.422216	-0.403196	-0.441237	-0.403196	-0.327114	-0.365155	-0.384175	-0.232012	-0.212992	-0.270053	-0.289073	-0.155931	-0.232012	-0.327114	-0.365155	-0.308094	-0.365155	-0.270053	-0.270053	-0.346135	-0.193972	-0.327114	-0.13691	-0.308094	-0.212992	-0.460257
EMR17008_20170629_S_23B	M	X	L	-0.103403	-0.448134	-0.384295	-0.409831	-0.537509	-0.47367	-0.320456	-0.218313	-0.231081	-0.00126044	1.19891	1.58195	1.30106	1.32659	1.45427	1.46704	1.23722	1.23722	1.12231	0.969094	0.739273	0.688202	0.369006	0.369006	0.381774	0.40731	0.279632	0.52222	0.126418	0.11365	0.330703	0.0242752	-0.0523317	-0.00126044	-0.128939	0.11365	-0.218313	-0.00126044	0.037043	0.394542
EMR17008_20170629_S_23C	M	X	L	1.01856	0.956218	1.21806	1.36769	1.06844	0.806591	0.806591	0.257959	-0.00388766	-0.190921	-0.552519	-0.702146	-0.627333	-0.564988	-0.502644	-0.215859	-0.09117	-0.0787011	0.0833946	-0.153514	-0.0662322	-0.0787011	-0.178452	-0.178452	-0.0537633	0.00858124	-0.0412944	0.0210501	0.208084	0.108332	-0.0288255	0.208084	0.220553	0.208084	0.208084	-0.0537633	-0.20339	-0.303141	-0.141046	-0.290672
EMR17008_20170629_S_23D	M	X	L	-0.293248	-0.293248	-0.327151	-0.361054	-0.327151	-0.394958	-0.428861	-0.327151	-0.327151	-0.394958	-0.259345	-0.293248	-0.0220228	0.452621	0.283106	0.215299	0.65604	0.622137	0.418718	0.147493	-0.0220228	-0.0898291	-0.191539	-0.0220228	-0.225442	-0.361054	-0.394958	-0.259345	-0.394958	-0.361054	-0.394958	-0.327151	-0.361054	-0.327151	-0.327151	-0.428861	-0.394958	-0.361054	-0.327151	-0.293248
EMR17008_20170629_S_23E	M	X	L	1.25667	1.41025	1.66622	1.8198	1.76861	1.61503	1.58943	0.975107	0.565558	0.642348	-0.0487667	-0.253541	-0.381526	-0.330332	-0.253541	-0.202348	0.207202	0.38638	0.38638	0.770332	1.0007	0.770332	0.616751	1.0007	0.770332	0.642348	0.642348	0.923914	0.693542	0.744736	0.821526	0.821526	0.360783	0.744736	0.488767	0.181605	0.283992	0.130411	-0.151154	-0.0231698
EMR17008_20170629_S_25A	M	X	R	-0.220733	-0.149257	-0.00630542	-0.101606	-0.0539559	0.160471	0.613151	0.899054	0.922879	0.636976	0.351073	0.255772	0.160471	0.112821	-0.101606	-0.196907	-0.220733	-0.220733	-0.220733	-0.125432	-0.0777812	-0.173082	-0.196907	-0.0777812	-0.196907	-0.173082	-0.173082	-0.173082	-0.0777812	-0.101606	0.208122	0.0651703	-0.0539559	-0.00630542	0.160471	0.0175198	0.0651703	0.303423	0.327248	0.112821
EMR17008_20170629_S_25B	M		R	0.77781	0.858373	0.858373	1.0195	0.77781	0.32129	0.0527481	0.106456	-0.00096023	-0.269502	-0.188939	-0.215794	-0.242648	-0.296356	-0.0546686	-0.242648	-0.0546686	-0.188939	-0.162085	-0.135231	-0.0278144	-0.108377	-0.188939	-0.0815227	-0.215794	-0.0278144	0.133311	0.428706	0.0258939	0.133311	0.106456	0.294436	0.401852	0.240727	0.32129	0.401852	0.0258939	0.213873	-0.0546686	-0.00096023
EMR17008_20170629_S_27A	M		L	0.231926	-0.0287885	-0.107003	-0.211288	-0.185217	-0.0809313	-0.133074	-0.0287885	-0.0287885	-0.0809313	0.0233544	0.231926	0.12764	0.0754972	0.12764	-0.159146	-0.289503	-0.341646	-0.23736	-0.289503	-0.159146	0.101569	-0.263431	0.0494258	-0.0809313	-0.0809313	-0.00271704	-0.107003	-0.159146	-0.0548599	-0.211288	-0.23736	-0.133074	-0.289503	-0.367717	-0.263431	-0.341646	-0.263431	-0.263431	-0.289503
EMR17008_20170629_S_27B	M	X	R	0.122911	0.273265	0.0226759	-0.0775596	0.122911	-0.0775596	0.0226759	-0.0274419	-0.127677	-0.177795	-0.177795	-0.127677	-0.127677	-0.177795	-0.177795	-0.177795	-0.127677	-0.0274419	0.0226759	-0.0775596	0.122911	0.0226759	0.223147	0.223147	0.423618	0.273265	0.323382	0.323382	0.423618	0.223147	0.0727936	0.0226759	-0.0274419	-0.0274419	-0.0775596	-0.0775596	-0.0775596	-0.0274419	-0.177795	0.0226759
EMR17008_20170629_S_29A	M	X	R	-0.00544894	0.161478	-0.00544894	0.0501934	0.133657	0.272763	0.411869	0.272763	0.328405	0.0501934	-0.0889125	-0.25584	-0.0889125	-0.0332701	-0.200197	-0.144555	-0.00544894	-0.200197	-0.00544894	0.189299	-0.0610913	0.300584	0.133657	0.189299	0.161478	-0.0889125	0.0780146	0.217121	-0.0332701	0.133657	-0.00544894	-0.0610913	0.0223722	-0.00544894	-0.228018	-0.00544894	-0.0332701	-0.200197	-0.116734	0.0223722
EMR17008_20170629_S_29B	M	X	R	0.0850612	-0.175209	-0.175209	-0.175209	-0.175209	-0.175209	0.171818	-0.0884524	-0.00169562	-0.175209	-0.175209	-0.0884524	-0.0884524	-0.0884524	-0.175209	-0.175209	0.0850612	-0.00169562	0.171818	0.258575	0.171818	0.0850612	-0.00169562	-0.00169562	-0.175209	0.171818	-0.00169562	0.171818	0.171818	0.171818	0.171818	-0.00169562	0.171818	-0.00169562	0.0850612	0.258575	0.171818	-0.00169562	-0.175209	0.0850612

## Sheet: Saline Cue Right
ID	sex	SidePref	CUE	ZSCORE -1	-0.9	-0.8	-0.7	-0.6	-0.5	-0.4	-0.3	-0.2	-0.1	-1.38778e-16	0.1	0.2	0.3	0.4	0.5	0.6	0.7	0.8	0.9	1	1.1	1.2	1.3	1.4	1.5	1.6	1.7	1.8	1.9	2	2.1	2.2	2.3	2.4	2.5	2.6	2.7	2.8	2.9
CDH16002_20161017_S_01A	F	X	L	-0.250465	-0.340496	-0.196447	-0.142429	-0.268472	-0.32249	-0.340496	-0.304484	-0.214453	-0.142429	-0.106416	-0.232459	-0.250465	-0.214453	-0.286478	-0.502551	-0.448533	-0.358502	-0.394515	-0.502551	-0.412521	-0.32249	-0.304484	-0.268472	-0.466539	-0.376508	-0.142429	-0.0884102	-0.268472	-0.32249	-0.286478	-0.196447	-0.160435	-0.0163857	-0.106416	-0.178441	-0.142429	-0.0343918	-0.052398	-0.0704041
CDH16002_20161017_S_17A	F		R	-0.0906014	0.0910715	-0.13602	0.13649	-0.181438	0.000235039	-0.181438	-0.181438	-0.226856	-0.13602	-0.181438	-0.226856	-0.181438	-0.13602	0.000235039	0.0456533	0.272744	0.499835	0.272744	0.318163	0.0456533	0.408999	0.0456533	0.0910715	0.000235039	-0.181438	0.000235039	-0.13602	0.000235039	0.0910715	-0.0906014	0.181908	-0.0451832	0.0456533	-0.181438	0.499835	-0.0906014	0.000235039	-0.0451832	0.000235039
CDH16002_20161017_S_19A	F		L	-0.3582	-0.516493	-0.444541	-0.3582	-0.315029	-0.34381	-0.3582	-0.185517	-0.199907	-0.171126	-0.171126	-0.0703945	-0.0703945	-0.171126	-0.127956	-0.329419	-0.329419	-0.315029	-0.37259	-0.271858	-0.271858	-0.257468	-0.0703945	0.015947	0.20302	0.217411	0.145459	0.476435	0.303752	0.447655	0.533996	0.361313	0.519606	0.649119	0.116679	0.404484	0.390094	0.361313	0.274972	0.548387
CDH16003_20161018_S_17A	F	X	R	-0.0135613	0.00566745	0.332556	0.351785	0.159497	0.0441249	0.140269	0.140269	-0.148163	0.197955	0.236412	0.159497	0.255641	-0.0904763	-0.167391	0.0633537	0.12104	0.4287	-0.109705	0.217184	0.0633537	-0.0135613	0.332556	0.178726	0.236412	0.294099	0.486386	-0.03279	-0.0520188	-0.0904763	0.00566745	-0.128934	-0.0904763	-0.0712475	-0.0904763	0.0248962	0.0248962	-0.0904763	-0.03279	-0.03279
CDH16005_20161021_S_05A	M	X	L	-0.00763855	-0.00763855	0.185205	-0.136201	0.120924	0.120924	-0.0719198	0.0566427	0.378049	0.0566427	-0.200482	0.120924	0.635174	0.313768	0.378049	0.313768	0.378049	0.313768	0.570893	0.313768	0.249487	0.120924	0.313768	0.185205	0.120924	-0.136201	0.0566427	0.313768	-0.00763855	0.185205	-0.00763855	-0.200482	-0.00763855	-0.136201	-0.136201	-0.00763855	0.0566427	-0.0719198	0.0566427	0.185205
CDH16005_20161021_S_07A	M		L	0.106163	-0.182407	-0.0999582	0.0649389	-0.0175097	0.106163	0.0237146	-0.0175097	0.0649389	-0.141183	0.0237146	-0.141183	0.0237146	-0.0999582	-0.141183	0.106163	-0.223631	0.0649389	0.0649389	0.0649389	-0.182407	-0.058734	0.0237146	0.188612	-0.182407	-0.30608	-0.30608	-0.141183	-0.223631	-0.223631	-0.141183	-0.182407	-0.30608	-0.0999582	-0.0175097	-0.264855	-0.264855	-0.223631	0.0237146	-0.0999582
CDH16005_20161021_S_07B	M	X	L	-0.324643	-0.196584	-0.111211	-0.153897	0.0381915	0.0381915	0.166251	0.0595347	-0.0258382	0.102221	-0.111211	-0.00449496	-0.281957	-0.431359	-0.474046	-0.495389	-0.623448	-0.666135	-0.474046	-0.217927	-0.153897	0.0808779	0.208937	0.0381915	0.272967	-0.23927	-0.0471814	0.0168483	0.251624	-0.0258382	-0.0258382	0.251624	0.0595347	0.123564	-0.0898678	0.187594	0.23028	0.166251	0.0381915	0.0808779
CDH16005_20161021_S_07C	M	X	R	0.325063	-0.0659119	0.18289	-0.101455	-0.243628	-0.279171	0.147347	0.0407177	0.218434	0.0762609	0.253977	0.0407177	0.431693	0.0407177	-0.0303687	-0.0303687	0.360607	-0.101455	-0.101455	-0.279171	-0.172542	0.0407177	-0.0303687	-0.172542	-0.314714	-0.385801	-0.421344	-0.279171	-0.421344	-0.172542	-0.136998	-0.421344	-0.136998	-0.421344	0.0762609	-0.101455	0.00517447	-0.0303687	-0.0659119	-0.279171
CDH16005_20161021_S_07D	M		L	-0.390692	-0.272544	-0.331618	-0.213469	-0.272544	-0.0657838	-0.0953209	-0.0657838	0.0819019	-0.124858	-0.00670953	-0.213469	-0.361155	-0.00670953	-0.331618	-0.420229	-0.538378	-0.567915	-0.626989	-0.361155	-0.538378	-0.449767	-0.361155	-0.597452	-0.567915	-0.390692	-0.420229	-0.420229	-0.154395	-0.154395	-0.0657838	-0.361155	-0.213469	-0.183932	-0.0657838	0.0523647	-0.0953209	-0.124858	-0.213469	-0.0362467
CDH16005_20161021_S_09A	M		R	0.0313313	0.585721	-0.0539594	0.0739767	-0.0539594	0.329849	0.0739767	-0.0966048	0.116622	0.0313313	-0.0539594	0.244558	0.116622	-0.0966048	-0.309832	0.116622	0.159267	0.0313313	0.287204	0.0739767	0.0313313	-0.13925	0.0739767	-0.0113141	0.0313313	0.0739767	-0.181896	0.116622	0.0739767	0.116622	0.0739767	-0.13925	-0.0539594	-0.0539594	-0.0113141	-0.0113141	-0.181896	0.116622	0.372494	0.0313313
CDH16005_20161021_S_09B	M		R	0.570869	0.686633	-0.00795315	0.281458	0.397222	-0.00795315	0.165693	-0.123718	-0.297364	0.0499291	-0.239482	-0.123718	0.107811	0.107811	0.223576	0.223576	0.223576	0.165693	0.281458	0.0499291	0.281458	-0.239482	-0.00795315	0.0499291	0.0499291	0.0499291	0.165693	-0.00795315	-0.0658354	0.0499291	-0.0658354	0.0499291	-0.239482	-0.239482	-0.1816	-0.0658354	-0.0658354	-0.239482	-0.239482	-0.00795315
CDH16005_20161021_S_09C	M	X	R	0.182162	0.0897498	-0.187488	-0.048869	-0.233694	-0.187488	-0.187488	0.228369	-0.0950753	-0.141282	-0.048869	-0.187488	0.0897498	0.274575	0.0897498	-0.048869	0.0435435	-0.187488	-0.187488	-0.141282	-0.187488	0.135956	-0.00266273	-0.0950753	-0.2799	-0.187488	-0.141282	-0.233694	-0.048869	-0.233694	-0.048869	-0.00266273	-0.187488	-0.2799	-0.187488	-0.00266273	0.0897498	-0.187488	-0.048869	0.135956
CDH16005_20161021_S_09D	M		L	-0.23805	-0.187052	-0.187052	-0.23805	-0.187052	-0.289048	-0.0850557	-0.187052	-0.289048	-0.23805	-0.187052	-0.0850557	-0.187052	-0.23805	-0.187052	-0.187052	-0.289048	-0.187052	-0.23805	-0.0850557	-0.23805	-0.289048	-0.289048	-0.23805	-0.289048	-0.289048	-0.23805	-0.289048	-0.289048	-0.136054	-0.23805	-0.23805	-0.289048	-0.187052	-0.136054	-0.23805	-0.0850557	-0.23805	-0.187052	-0.187052
CDH16005_20161021_S_09E	M		L	-0.0624961	-0.13245	0.0774116	-0.0624961	0.00745776	0.147366	-0.202404	0.217319	-0.13245	-0.13245	0.147366	-0.0624961	0.147366	0.00745776	0.147366	0.357227	0.0774116	-0.202404	0.00745776	-0.13245	0.00745776	0.0774116	0.217319	0.217319	0.217319	0.00745776	0.0774116	0.147366	-0.13245	0.0774116	0.287273	-0.0624961	0.0774116	0.00745776	-0.0624961	0.00745776	0.00745776	-0.13245	-0.0624961	-0.272358
CDH16005_20161021_S_13A	M		R	0.30241	0.502438	0.391311	0.391311	0.391311	0.457987	0.524663	0.169058	0.324635	0.0801568	0.280185	-0.0976457	0.169058	-0.0531951	-0.0754204	-0.0531951	0.0134808	-0.186547	-0.230998	-0.00874446	-0.142096	0.0357062	0.213509	0.213509	0.124607	0.102382	0.235734	0.213509	0.124607	0.102382	-0.0531951	-0.0754204	0.124607	-0.0976457	-0.00874446	-0.275448	-0.0531951	-0.0531951	-0.230998	-0.186547
CDH16005_20161021_S_15A	M	X	L	-0.0903146	-0.209899	-0.429136	-0.468997	-0.429136	-0.309552	-0.150107	-0.170037	-0.528789	-0.0903146	-0.349413	-0.528789	-0.369344	-0.349413	-0.130176	0.487674	0.587328	0.447813	0.467744	0.34816	0.188715	0.0890613	-0.070384	0.108992	-0.0903146	0.0691306	-0.010592	-0.070384	0.148853	-0.070384	-0.0305227	-0.070384	0.328229	0.00933864	0.188715	0.108992	0.388021	0.308298	0.268437	0.34816
CDH16005_20161021_S_15B	M	X	L	0.0487062	0.18814	0.0951842	-0.0907279	0.141662	0.327574	0.0487062	0.18814	0.42053	0.0487062	0.141662	0.141662	-0.137206	0.00222815	-0.0907279	0.00222815	0.00222815	0.00222815	0.0951842	0.281096	0.42053	0.699399	1.07122	0.792355	0.513486	0.327574	0.652921	0.18814	0.374052	0.513486	0.374052	0.0487062	0.18814	0.467008	0.467008	0.141662	0.0951842	0.18814	0.0951842	0.0951842
CDH16005_20161021_S_15C	M	X	R	0.246973	0.0273273	-0.164863	-0.329597	-0.357052	-0.24723	-0.549242	-0.494331	-0.164863	-0.43942	-0.0275841	-0.357052	-0.109951	0.246973	0.384251	0.219517	0.219517	0.466618	0.52153	0.411707	0.0822387	-0.0550398	-0.0275841	-0.0275841	0.13715	-0.302141	0.0273273	-0.164863	0.0822387	-0.0275841	0.0273273	-0.0275841	-0.219774	0.13715	-0.109951	0.0273273	-0.0550398	-0.219774	-0.0275841	0.0822387
CDH16005_20161021_S_17A	M	X	R	0.235553	0.0613808	0.177495	0.00332355	0.0613808	-0.0547337	-0.228906	0.235553	-0.170848	-0.228906	0.00332355	0.0613808	0.177495	0.0613808	-0.0547337	-0.286963	-0.170848	0.177495	0.29361	0.409725	0.409725	0.00332355	0.177495	0.119438	0.00332355	-0.170848	-0.0547337	0.0613808	0.235553	0.00332355	-0.170848	-0.112791	-0.0547337	-0.112791	-0.170848	0.00332355	-0.112791	-0.170848	0.0613808	-0.228906
CDH16005_20161021_S_17B	M		R	0.189101	0.397121	0.189101	0.293111	0.137096	0.345116	-0.174934	0.0850909	-0.122929	-0.0709241	-0.0189191	-0.0709241	-0.174934	-0.122929	-0.122929	0.189101	0.137096	-0.122929	-0.0189191	-0.0189191	-0.0709241	-0.0709241	0.0330859	0.189101	-0.0189191	-0.0189191	0.137096	0.0330859	-0.122929	-0.0189191	-0.122929	-0.0189191	-0.0189191	0.0850909	-0.122929	-0.174934	-0.226939	-0.226939	-0.0189191	-0.0189191
CDH16005_20161021_S_17C	M	X	L	0.0526092	-0.0160835	0.396072	0.32738	0.464765	0.60215	0.32738	0.533457	0.32738	0.189994	-0.222161	0.464765	-0.153469	-0.153469	-0.222161	-0.222161	0.0526092	-0.0847761	-0.153469	0.0526092	-0.0160835	-0.0160835	-0.0847761	0.396072	0.670843	0.670843	0.876921	0.464765	0.670843	0.464765	0.258687	0.189994	0.0526092	0.189994	0.121302	0.121302	-0.0160835	0.258687	-0.0847761	-0.0160835
CDH16005_20161021_S_17D	M		R	0.0480318	-0.0863187	0.0480318	-0.153494	-0.153494	-0.0191435	-0.0191435	-0.220669	0.182382	0.585434	-0.0191435	-0.0863187	-0.153494	0.115207	0.115207	-0.0863187	-0.0863187	-0.0191435	-0.153494	-0.220669	-0.0191435	-0.0191435	-0.0191435	-0.153494	0.249558	0.115207	-0.0863187	-0.153494	-0.220669	-0.220669	0.115207	-0.287845	-0.0863187	-0.220669	-0.220669	-0.153494	-0.153494	-0.0863187	-0.0863187	-0.220669
CDH16005_20161021_S_17E	M		L	-0.0627575	-0.0627575	-0.00706676	0.215696	0.048624	0.271387	-0.0627575	-0.0627575	0.104315	-0.0627575	-0.0627575	-0.00706676	-0.0627575	-0.00706676	0.104315	0.048624	0.327078	0.104315	0.048624	-0.00706676	-0.0627575	0.048624	-0.0627575	-0.22983	-0.00706676	-0.174139	-0.118448	0.048624	-0.118448	-0.118448	-0.0627575	-0.00706676	-0.0627575	-0.22983	-0.00706676	-0.174139	-0.118448	0.160005	-0.174139	-0.174139
CDH16005_20161021_S_17F	M	X	R	0.116661	-0.0199286	0.253251	-0.0199286	0.116661	0.116661	-0.0199286	0.253251	-0.0199286	-0.0199286	-0.0199286	-0.0199286	0.253251	-0.0199286	-0.0199286	-0.156518	-0.0199286	0.38984	0.38984	0.52643	0.52643	-0.156518	0.116661	-0.0199286	0.253251	-0.156518	-0.0199286	0.116661	0.116661	-0.0199286	-0.156518	-0.156518	-0.0199286	-0.156518	-0.0199286	-0.156518	-0.0199286	-0.156518	-0.0199286	-0.156518
CDH16005_20161021_S_21A	M	X	R	-0.18535	-0.211338	-0.367267	-0.393255	-0.393255	-0.445231	-0.419243	-0.315291	-0.341279	-0.133374	-0.159362	-0.159362	0.386387	0.828184	0.308423	0.412375	0.0485421	-0.18535	-0.0554101	-0.18535	-0.263315	-0.159362	-0.18535	-0.0813982	-0.18535	-0.159362	-0.107386	-0.237327	-0.159362	-0.107386	0.152494	-0.159362	0.0225541	0.126506	0.100518	-0.18535	-0.0554101	-0.133374	-0.159362	-0.133374
CDH16005_20161021_S_21B	M	X	R	0.187181	0.262478	0.0867849	0.162082	0.111884	0.0867849	0.136983	0.0365868	0.0365868	0.162082	0.262478	0.187181	0.362874	0.513469	0.513469	0.312676	0.136983	0.187181	0.262478	0.312676	0.438172	0.965251	0.638964	0.588766	0.588766	0.438172	0.563667	0.187181	0.237379	0.21228	0.21228	0.162082	-0.0638093	0.262478	0.21228	0.162082	-0.0387103	0.0867849	0.162082	0.136983
CDH16005_20161021_S_21C	M		R	0.303146	0.196663	0.090181	-0.176025	0.090181	-0.0163014	-0.0695426	-0.0163014	-0.0695426	-0.0163014	-0.0695426	-0.0695426	0.0369398	-0.0163014	0.0369398	-0.0163014	0.356387	0.090181	0.090181	0.249905	0.0369398	0.249905	0.196663	0.249905	0.090181	0.090181	-0.0695426	-0.0695426	-0.0695426	-0.122784	-0.0163014	0.0369398	-0.176025	0.090181	0.0369398	-0.0695426	-0.122784	-0.0695426	-0.122784	-0.229266
CDH16005_20161021_S_21D	M		L	0.0571003	0.0101295	0.0571003	0.0571003	-0.130783	-0.0838122	-0.0368414	0.0571003	-0.0368414	-0.177754	0.0101295	-0.0838122	0.0101295	0.198013	0.0571003	0.151042	0.151042	-0.0368414	0.0571003	-0.318666	0.479838	0.151042	0.385896	0.0571003	0.104071	0.0101295	-0.177754	-0.0368414	-0.130783	-0.224725	-0.130783	-0.224725	0.0571003	0.0571003	-0.177754	-0.0838122	-0.130783	0.0101295	0.104071	-0.224725
CDH16005_20161021_S_25A	M	X	R	0.175802	0.265068	-0.0324849	0.294824	0.0567811	-0.0919955	0.146047	-0.00272953	0.0270258	0.205558	0.532866	0.146047	0.146047	0.265068	0.235313	0.473356	0.294824	0.354334	0.175802	0.0567811	-0.121751	-0.0622402	0.0865364	0.116292	-0.181261	-0.0324849	-0.211017	-0.181261	-0.121751	-0.211017	-0.151506	-0.240772	-0.121751	-0.211017	-0.151506	-0.389549	-0.0324849	0.0567811	-0.0622402	-0.121751
CDH16005_20161021_S_25B	M		L	-0.300599	-0.507231	-0.432092	-0.58237	-0.657509	-0.732648	-0.826571	-0.789002	-0.657509	-0.469661	-0.356953	-0.131536	-0.0563971	0.0563113	0.0375266	-0.22546	-0.150321	0.13145	-0.112751	-0.0563971	-0.131536	-0.263029	-0.300599	-0.5448	-0.356953	-0.526015	-0.413307	-0.563585	-0.5448	-0.507231	-0.488446	-0.507231	-0.413307	-0.450877	-0.526015	-0.394522	-0.413307	-0.450877	-0.488446	-0.563585
CDH16005_20161021_S_25C	M		L	0.303299	0.255524	-0.055019	-0.150571	-0.293898	-0.437225	-0.317786	-0.27001	-0.413337	-0.126683	0.231636	0.494402	0.757169	0.613842	0.231636	0.303299	0.159972	0.136084	0.279411	0.0405325	0.231636	0.18386	-0.126683	0.0405325	-0.055019	-0.0789069	-0.27001	-0.150571	-0.0311311	-0.246122	-0.0789069	-0.150571	-0.317786	-0.222234	-0.00724323	-0.27001	-0.293898	-0.246122	-0.341674	-0.246122
CDH16005_20161021_S_25D	M		R	-0.136112	-0.174351	-0.21259	-0.174351	-0.136112	-0.155232	-0.155232	-0.250829	-0.250829	-0.0978737	-0.308187	-0.269948	-0.174351	-0.289067	-0.327306	-0.422903	-0.442022	-0.461141	-0.365545	-0.346425	-0.269948	-0.136112	-0.250829	-0.327306	-0.308187	-0.365545	-0.308187	-0.365545	-0.289067	-0.289067	-0.327306	-0.365545	-0.365545	-0.327306	-0.5185	-0.5185	-0.614096	-0.5185	-0.461141	-0.461141
CDH16005_20161021_S_25E	M		R	0.345113	0.134507	0.260871	0.134507	-0.118221	0.0923852	0.218749	0.260871	0.302992	0.345113	0.513598	0.387234	0.850569	0.302992	0.471477	0.471477	0.302992	0.471477	0.218749	0.302992	0.0502639	-0.0761001	-0.202464	-0.0339788	-0.0761001	-0.286707	-0.118221	0.0923852	0.00814256	0.0923852	0.00814256	-0.160343	-0.286707	0.345113	0.0923852	0.00814256	-0.413071	-0.0761001	-0.244585	-0.160343
CDH16005_20161021_S_31A	M	X	L	-0.154965	-0.0852412	0.0193441	-0.0852412	-0.0852412	0.123929	0.611994	0.3331	0.646856	0.437685	0.0890677	0.298238	0.0193441	0.0890677	0.3331	0.507409	0.0542059	0.193653	-0.0503795	-0.0852412	-0.0503795	0.0890677	-0.294412	-0.224688	-0.0852412	-0.25955	-0.364135	-0.224688	-0.0155177	-0.189827	-0.329274	-0.329274	-0.0852412	-0.189827	-0.154965	-0.25955	-0.224688	-0.120103	-0.120103	-0.0852412
CDH16008_20161019_S_09A	M		L	-0.0163497	0.120721	0.0750309	0.212102	-0.06204	0.0750309	-0.10773	-0.06204	0.349173	0.303482	-0.06204	-0.153421	-0.199111	0.486244	0.257792	0.440553	-0.10773	0.257792	0.120721	0.0293406	0.0750309	-0.153421	-0.0163497	-0.199111	0.257792	0.0750309	-0.10773	0.440553	0.212102	0.0750309	0.212102	-0.06204	-0.0163497	-0.0163497	0.0750309	0.120721	-0.0163497	0.0293406	-0.06204	0.303482
CDH16008_20161019_S_23A	M		R	0.0448397	-0.0663196	0.0818928	0.0448397	0.0448397	-0.0292665	0.0077866	-0.251585	-0.140426	0.0448397	0.155999	-0.0292665	0.193052	0.0448397	0.118946	0.230105	0.193052	0.118946	-0.103373	0.230105	0.193052	0.0818928	0.267158	0.304211	0.118946	0.230105	0.304211	0.118946	0.304211	0.0818928	0.0818928	0.0448397	0.0448397	-0.103373	-0.0663196	-0.0663196	0.155999	0.267158	-0.0292665	0.0077866
CDH16010_20161025_S_01A	F	X	R	-0.0491179	-0.164908	0.105269	-0.203505	0.0666723	-0.0877146	-0.126311	-0.164908	0.0666723	-0.0105212	-0.126311	0.0280756	0.105269	0.221059	0.259656	-0.0491179	0.0666723	-0.0105212	0.56843	0.0280756	0.0666723	0.259656	0.105269	0.0666723	0.0666723	-0.126311	0.298253	0.375446	-0.0877146	-0.0877146	-0.0491179	0.259656	-0.203505	0.0666723	0.298253	0.105269	0.0666723	0.0666723	0.0280756	-0.0877146
CDH16010_20161025_S_01B	F		R	-0.140136	-0.00238702	-0.140136	-0.00238702	-0.00238702	-0.00238702	-0.20901	-0.0712614	-0.277884	-0.140136	-0.20901	-0.277884	-0.140136	-0.140136	-0.00238702	-0.140136	-0.0712614	0.0664873	0.135362	0.410859	-0.0712614	-0.0712614	-0.00238702	-0.0712614	-0.0712614	0.0664873	-0.140136	-0.140136	-0.00238702	0.0664873	-0.20901	-0.140136	0.135362	-0.140136	0.204236	0.204236	0.135362	-0.00238702	-0.00238702	-0.0712614
CDH16010_20161025_S_05A	F	X	L	-0.428198	-0.142627	-0.0387828	0.0650613	-0.142627	-0.0907049	-0.298393	0.0910224	-0.116666	0.168905	-0.324354	-0.194549	-0.350315	-0.194549	-0.272432	-0.324354	-0.0907049	-0.168588	-0.194549	-0.22051	-0.298393	-0.298393	-0.324354	-0.168588	-0.48012	-0.298393	-0.116666	-0.194549	-0.0647439	-0.142627	-0.116666	-0.272432	-0.376276	-0.246471	-0.272432	-0.402237	-0.22051	-0.402237	-0.168588	-0.350315
CDH16010_20161025_S_05B	F	X	R	0.128453	-0.0642989	-0.016111	0.0802649	-0.208863	0.128453	-0.016111	0.0802649	0.369393	0.0802649	-0.353427	-0.0642989	0.032077	0.176641	0.0802649	0.032077	0.032077	0.321205	-0.016111	0.369393	-0.016111	-0.016111	0.224829	0.176641	0.321205	0.224829	0.321205	0.176641	0.369393	-0.0642989	0.0802649	0.128453	-0.016111	0.321205	0.273017	0.0802649	0.032077	0.176641	-0.0642989	-0.016111
CDH16010_20161025_S_07A	F		L	-0.153185	0.0247873	0.0544495	-0.00487479	0.113774	0.173098	0.173098	0.113774	-0.00487479	-0.242172	-0.390483	-0.420145	-0.271834	-0.449807	-0.390483	-0.331158	-0.479469	-0.420145	-0.271834	-0.36082	-0.449807	-0.479469	-0.331158	-0.36082	-0.509131	-0.479469	-0.390483	-0.21251	-0.00487479	-0.21251	-0.0641991	-0.00487479	-0.242172	-0.0641991	-0.182848	-0.242172	-0.21251	-0.242172	-0.0641991	-0.153185
CDH16010_20161025_S_07B	F	X	R	-0.0155223	-0.0545241	-0.0935259	-0.0545241	0.140485	0.101483	0.101483	0.218489	0.218489	-0.0545241	0.374496	0.725513	0.374496	0.998525	0.725513	1.07653	0.647509	0.725513	1.03753	1.03753	0.647509	0.569505	0.998525	1.27154	0.374496	0.920522	0.569505	0.218489	0.257491	0.4525	0.4525	0.257491	0.608507	0.374496	0.4525	0.218489	0.530503	0.0624814	0.257491	0.335494
CDH16010_20161025_S_11A	F	X	R	-0.0809305	0.307728	0.178175	-0.469589	-0.124115	0.00543812	0.0918067	0.134991	-0.0377462	-0.0809305	0.178175	0.134991	-0.0809305	0.480465	0.394097	0.0918067	0.0918067	0.394097	0.394097	0.350913	0.00543812	0.264544	0.0486224	0.00543812	0.394097	0.264544	0.0918067	0.264544	0.22136	0.307728	-0.253668	0.134991	0.0918067	0.350913	-0.0377462	-0.0809305	0.0486224	0.0918067	0.0486224	0.0918067
CDH16010_20161025_S_13A	F		R	0.00714606	0.0614226	0.332805	-0.0471305	-0.101407	0.115699	0.00714606	-0.155684	-0.101407	-0.155684	0.224252	0.00714606	0.0614226	0.115699	0.278529	-0.0471305	-0.0471305	-0.318513	-0.20996	0.332805	0.115699	-0.101407	0.115699	-0.101407	0.115699	0.00714606	0.115699	0.224252	0.169976	0.0614226	0.115699	0.00714606	-0.0471305	-0.0471305	0.115699	0.278529	0.0614226	0.169976	-0.0471305	0.387082
CDH16010_20161025_S_15A	F	X	L	-0.281703	-0.324682	-0.281703	-0.324682	-0.238724	-0.109789	-0.195746	-0.06681	-0.0238314	-0.195746	-0.238724	-0.06681	-0.281703	-0.324682	-0.410639	-0.36766	-0.410639	-0.324682	-0.36766	-0.324682	-0.36766	-0.324682	-0.324682	-0.324682	-0.195746	-0.238724	-0.238724	-0.496596	-0.410639	-0.410639	-0.36766	-0.36766	-0.152767	-0.109789	-0.36766	-0.109789	-0.238724	-0.06681	-0.195746	-0.238724
CDH16010_20161025_S_17A	F		R	-0.07355	-0.186107	-0.111069	-0.148588	-0.186107	-0.07355	0.0765255	-0.336182	-0.07355	-0.261144	0.0390067	-0.223625	-0.336182	-0.07355	-0.186107	-0.223625	-0.148588	0.189082	-0.111069	0.00148778	-0.261144	-0.07355	-0.0360311	-0.111069	0.226601	-0.07355	-0.148588	-0.111069	-0.148588	-0.148588	-0.223625	-0.336182	-0.111069	-0.148588	-0.223625	-0.07355	0.0765255	0.114044	-0.0360311	-0.223625
CDH16010_20161025_S_17B	F	X	L	0.0234968	0.0549317	0.0234968	0.117801	0.149236	0.36928	-0.00793802	0.0234968	0.0863665	-0.0393729	-0.00793802	-0.290852	-0.133677	-0.353721	0.0234968	0.0234968	0.149236	-0.259417	0.243541	-0.165112	-0.0393729	-0.0708077	0.117801	0.117801	0.212106	0.337845	-0.0393729	-0.0393729	0.0549317	0.274976	0.526454	0.36928	0.117801	0.400715	0.36928	0.243541	0.0549317	0.180671	0.180671	0.149236
CDH16010_20161025_S_21A	F	X	R	-0.205396	-0.0796616	-0.230543	-0.104808	0.247247	-0.00422114	0.0209257	-0.104808	-0.00422114	-0.255689	-0.255689	-0.180249	-0.0545148	-0.0796616	-0.205396	-0.0545148	-0.00422114	-0.029368	0.0963661	-0.155102	-0.180249	0.121513	0.196953	-0.0545148	0.0963661	0.0209257	0.347834	0.272394	-0.0796616	0.0209257	-0.00422114	0.247247	0.398128	0.372981	0.0460725	0.121513	0.0712193	0.171807	-0.0796616	0.272394
CDH16010_20161025_S_21B	F	X	L	0.133468	0.18183	0.278553	0.157649	0.278553	0.109287	-0.084159	-0.10834	-0.084159	-0.0116166	-0.543594	-0.446871	-0.132521	0.0125642	-0.132521	-0.0599782	-0.301786	-0.132521	-0.0599782	0.0851066	0.036745	-0.229244	-0.132521	0.0609258	0.0851066	-0.277606	-0.0116166	0.157649	-0.132521	-0.0357974	0.423638	0.472	-0.0357974	0.206011	0.230191	-0.180882	0.18183	0.0125642	0.302734	-0.0357974
CDH16010_20161025_S_23A	F	X	L	0.174033	0.349754	0.199136	0.123827	0.525476	0.500373	0.575682	0.0234148	0.450166	0.600785	-0.0267912	0.0485179	0.14893	0.0736209	0.123827	0.0736209	0.324651	0.249342	0.249342	0.525476	0.199136	0.39996	0.525476	0.425063	0.751403	0.475269	0.751403	0.324651	0.475269	0.374857	0.349754	0.450166	0.39996	0.625888	0.650991	0.324651	0.701197	0.299548	0.374857	0.174033
CDH16010_20161025_S_23B	F	X	L	0.301148	0.17409	0.237619	0.45997	0.523499	0.555263	0.650557	0.777615	0.904673	0.999966	1.44467	1.0635	0.428205	0.618792	0.523499	0.587028	0.142325	0.491734	0.428205	0.332912	0.364677	0.301148	0.269383	-0.111791	0.0787961	0.237619	-0.0164973	0.17409	0.0787961	-0.143555	0.0152672	0.0787961	-0.143555	0.0152672	0.0470317	-0.111791	-0.0164973	0.0787961	-0.17532	0.0152672
CDH16010_20161025_S_23C	F		L	-0.11328	-0.0331658	0.153767	-0.0331658	-0.11328	0.0736531	0.260586	-0.16669	-0.16669	-0.0598706	-0.300213	-0.353623	-0.11328	-0.0865753	0.127063	-0.193394	0.153767	0.153767	0.0736531	0.0736531	0.0469484	0.0202437	0.287291	0.233882	0.180472	0.420815	0.207177	0.233882	0.287291	0.127063	0.100358	0.180472	-0.16669	0.207177	0.0202437	-0.00646109	-0.0331658	-0.0331658	-0.00646109	0.0469484
CDH16010_20161025_S_23D	F	X	L	-0.0943956	-0.370534	-0.266982	-0.16343	0.250777	-0.0253611	-0.266982	-0.128913	0.0436734	-0.16343	-0.232465	0.112708	0.112708	0.181742	-0.0943956	-0.0598784	0.112708	-0.128913	0.21626	-0.266982	-0.197947	-0.16343	0.0781906	0.00915613	0.0781906	-0.0943956	0.0436734	-0.0253611	0.112708	-0.0943956	-0.197947	-0.336016	-0.266982	0.00915613	-0.197947	-0.16343	-0.266982	-0.197947	-0.232465	-0.266982
CDH16010_20161025_S_25A	F	X	L	-0.257479	0.170433	-0.0791822	-0.18616	-0.328798	-0.0791822	-0.293138	-0.0078635	-0.293138	-0.328798	-0.542754	-0.471435	-0.507094	-0.435776	-0.257479	-0.471435	-0.400116	-0.364457	-0.435776	-0.22182	-0.542754	-0.257479	-0.328798	-0.150501	-0.257479	-0.257479	0.0277959	-0.114842	-0.293138	0.0634552	-0.0078635	-0.0435229	-0.0078635	-0.0078635	-0.257479	-0.0791822	-0.0078635	-0.0435229	-0.150501	-0.18616
CDH16010_20161025_S_25B	F	X	L	0.0717913	-0.177221	-0.141648	-0.283941	-0.319514	-0.141648	-0.212794	-0.212794	-0.248368	-0.106075	-0.283941	-0.283941	-0.319514	-0.212794	-0.212794	-0.248368	-0.0705016	0.107364	-0.177221	-0.0349284	0.000644836	-0.106075	0.000644836	-0.0349284	-0.106075	-0.0349284	-0.106075	-0.248368	0.107364	-0.212794	-0.177221	0.0717913	-0.0705016	0.036218	-0.0705016	0.142938	-0.177221	-0.141648	0.285231	0.000644836
CDH16010_20161025_S_25C	F	X	L	0.142834	0.173787	0.359503	0.0499765	-0.104787	-0.166692	-0.197645	-0.25955	-0.228597	-0.197645	-0.445266	-0.228597	-0.352408	-0.197645	-0.445266	-0.166692	-0.228597	0.0499765	-0.166692	-0.414313	-0.104787	-0.104787	-0.135739	-0.228597	-0.25955	-0.0119288	-0.38336	-0.197645	0.0190238	-0.228597	-0.0119288	0.0499765	0.0190238	-0.104787	-0.0428814	0.266645	0.20474	0.266645	0.173787	-0.135739
CDH16010_20161025_S_25D	F	X	R	-0.315598	-0.27895	-0.42554	-0.42554	-0.42554	-0.462188	-0.388893	-0.498835	-0.27895	-0.315598	-0.352245	-0.42554	-0.42554	-0.352245	-0.315598	-0.388893	-0.352245	-0.242303	-0.315598	-0.27895	-0.352245	-0.315598	-0.535482	-0.315598	-0.388893	-0.388893	-0.315598	-0.315598	-0.42554	-0.462188	-0.42554	-0.388893	-0.352245	-0.388893	-0.42554	-0.27895	-0.388893	-0.242303	-0.388893	-0.352245
CDH16010_20161025_S_25E	F		R	-0.00871792	-0.00871792	0.0601155	-0.284052	-0.146385	0.0945322	-0.00871792	-0.0775514	0.128949	0.0601155	-0.0775514	-0.0775514	0.0601155	0.232199	0.163366	0.0256988	0.163366	-0.00871792	0.266616	0.266616	0.369866	0.54195	0.404283	0.473116	0.438699	0.6452	0.714033	0.576366	0.232199	0.54195	0.610783	0.369866	0.438699	0.473116	0.54195	0.782867	0.610783	0.335449	0.335449	0.74845
CDH16010_20161025_S_27A	F	X	R	0.44756	0.206727	0.487699	0.407421	0.44756	0.728532	0.768671	0.768671	0.287005	0.567977	1.41089	0.728532	0.688394	0.44756	0.44756	0.206727	0.0863104	0.0461716	0.206727	0.44756	0.126449	0.44756	0.407421	0.166588	0.206727	0.00603269	0.407421	0.126449	0.287005	0.166588	0.567977	0.287005	0.126449	-0.0341062	0.166588	0.0461716	-0.0341062	-0.154523	-0.0341062	0.0863104
CDH16010_20161025_S_27B	F	X	L	0.376827	0.117336	0.279518	0.766063	0.34439	0.539009	0.571445	0.052463	0.441699	0.34439	1.05799	0.830936	0.733627	0.279518	0.214645	-0.109719	0.376827	0.117336	0.052463	0.34439	-0.0124098	0.182208	0.279518	0.279518	0.539009	0.279518	0.603881	0.247081	0.376827	0.668754	0.279518	0.474136	0.506572	0.117336	0.766063	0.474136	0.311954	0.474136	0.311954	0.34439
CDH16010_20161025_S_27C	F	X	R	0.0961793	-0.302016	0.0165402	-0.182558	-0.102919	0.0563597	-0.142738	-0.182558	0.0563597	-0.0630989	0.0961793	-0.0630989	0.175818	0.175818	0.0961793	-0.222377	0.175818	0.0961793	0.0563597	-0.102919	0.0563597	0.0165402	0.0563597	-0.102919	-0.102919	-0.142738	0.255458	-0.0232794	0.175818	-0.0630989	-0.0232794	-0.0232794	-0.0232794	-0.142738	-0.0630989	0.335097	0.0961793	-0.0232794	0.0563597	-0.102919
CDH16010_20161025_S_27D	F		L	0.0739669	0.216537	-0.0686036	-0.116127	0.0264434	-0.0686036	-0.0686036	-0.163651	0.0739669	0.12149	0.12149	-0.0210801	-0.163651	0.0264434	-0.163651	0.0264434	-0.0686036	0.0264434	0.0264434	-0.116127	-0.0686036	0.0264434	-0.211174	-0.116127	-0.0210801	-0.116127	0.0739669	-0.163651	-0.306221	-0.0686036	-0.163651	-0.258698	-0.116127	0.264061	-0.163651	-0.163651	0.0739669	0.0739669	0.264061	0.406631
CDH16010_20161025_S_27E	F	X	R	-0.116335	-0.0232263	-0.178407	-0.0852988	-0.0852988	0.287136	-0.0232263	0.0698823	-0.0232263	0.100918	0.100918	0.194027	0.380244	0.287136	0.380244	0.2561	0.287136	0.0698823	0.318172	0.597498	0.535425	0.752679	0.969932	0.690606	0.845787	1.00097	0.752679	0.473353	0.721643	0.535425	0.65957	0.194027	0.628534	0.380244	0.100918	0.65957	0.287136	0.349208	0.318172	0.100918
CDH16010_20161025_S_29A	F		R	-0.385571	-0.135739	-0.229426	-0.198197	-0.354342	-0.4168	-0.10451	-0.291884	-0.229426	0.114094	-0.166968	0.0828649	-0.10451	0.0828649	0.0204067	0.0828649	-0.0420515	-0.0420515	-0.10451	-0.229426	-0.135739	0.0204067	-0.323113	-0.0732805	-0.10451	0.0204067	0.0204067	-0.260655	-0.135739	-0.135739	-0.354342	-0.323113	0.114094	0.145323	0.0516358	-0.260655	-0.10451	-0.0420515	-0.198197	-0.198197
CDH16010_20161025_S_29B	F	X	L	0.0583239	0.205981	0.23059	0.0829333	0.304418	0.353637	0.205981	-0.0893329	0.452075	0.0583239	0.0337144	-0.113942	0.0337144	-0.21238	-0.0647234	-0.335427	-0.286209	-0.187771	-0.0647234	-0.261599	0.205981	-0.138552	-0.21238	-0.0401139	-0.0155045	-0.0647234	-0.138552	0.107543	0.402856	-0.0893329	0.279809	0.0337144	0.107543	-0.286209	0.0583239	0.329028	0.00910496	-0.0647234	-0.0155045	-0.0893329
CDH16011_20161027_S_09A	F	X	L	-0.112249	0.243169	0.06546	0.37645	0.420877	0.332023	0.109887	-0.289957	-0.0233943	-0.0678215	-0.201103	-0.0678215	0.243169	0.0210329	0.06546	0.243169	0.109887	0.198742	-0.0678215	-0.0678215	0.243169	0.06546	0.0210329	-0.0233943	0.287596	-0.112249	0.287596	0.154314	0.332023	0.332023	0.465305	0.68744	0.06546	0.465305	0.243169	0.37645	0.420877	0.37645	0.287596	0.198742
CDH16011_20161027_S_15A	F	X	R	0.989252	0.641041	0.889763	0.765402	0.889763	0.889763	0.715658	0.0441074	0.342574	0.168469	-0.105126	0.118724	-0.105126	-0.0553816	-0.00563709	-0.204615	-0.105126	0.0441074	0.267957	0.193341	0.367446	0.491808	0.715658	0.641041	0.417191	0.392319	0.641041	0.665913	0.765402	0.74053	0.367446	0.243085	0.641041	0.466935	0.168469	0.143596	0.0689796	0.118724	0.0441074	0.218213
CDH16011_20161027_S_29A	F	X	R	-0.165034	-0.100604	-0.229464	-0.0361742	-0.100604	-0.100604	-0.0361742	0.157116	-0.0361742	-0.0361742	-0.165034	-0.293895	-0.100604	-0.229464	0.285976	-0.229464	-0.100604	-0.229464	0.285976	0.0282559	-0.100604	-0.293895	-0.100604	-0.229464	-0.229464	-0.165034	-0.165034	0.0282559	-0.100604	-0.293895	-0.229464	-0.165034	0.0282559	-0.165034	-0.165034	0.0282559	0.092686	-0.0361742	-0.0361742	-0.100604
CDH16011_20161027_S_31A	F	X	L	0.00373483	0.0865548	0.335015	-0.0790852	0.0865548	0.335015	0.0865548	-0.161905	-0.0790852	-0.0790852	-0.244725	-0.327545	-0.161905	-0.244725	-0.0790852	-0.0790852	0.252195	0.169375	0.169375	0.252195	0.252195	0.417835	0.500655	0.417835	0.252195	0.252195	0.335015	0.00373483	-0.161905	0.0865548	0.252195	0.0865548	0.0865548	-0.161905	0.00373483	-0.161905	-0.0790852	-0.161905	0.00373483	0.0865548
CDH169019_20161018_S_01A	M	X	R	-0.0879564	-0.0500187	-0.277645	0.00688774	0.0448254	-0.106925	-0.0310499	0.00688774	0.253482	0.101732	-0.144863	0.120701	0.405233	0.386264	0.575952	0.177607	0.310389	0.082763	0.101732	0.215545	0.405233	0.196576	-0.201769	0.00688774	-0.0310499	0.00688774	-0.125894	-0.125894	-0.0879564	-0.0879564	-0.182801	-0.182801	-0.106925	-0.163832	-0.0500187	-0.0500187	0.082763	-0.106925	-0.239707	-0.144863
CDH169019_20161018_S_03A	M	X	R	0.072416	-0.104103	-0.280621	-0.0334951	-0.245317	-0.17471	-0.17471	-0.0334951	-0.280621	-0.0334951	-0.139406	-0.0334951	-0.245317	-0.139406	-0.351228	-0.17471	-0.139406	-0.315925	-0.139406	-0.245317	-0.210014	-0.315925	0.0371123	-0.104103	-0.0334951	0.072416	-0.0687988	0.354846	0.0371123	-0.0334951	0.072416	0.10772	0.00180859	0.213631	0.143023	0.072416	-0.0334951	0.10772	-0.0687988	0.00180859
CDH169019_20161018_S_05A	M	X	L	0.178408	0.235476	0.092806	0.321077	0.235476	-0.192533	-0.106932	0.092806	-0.192533	-0.0783976	-0.306669	-0.420805	-0.306669	-0.249601	-0.392271	-0.335203	-0.420805	-0.192533	-0.278135	-0.221067	-0.0213297	0.292543	0.292543	0.178408	0.463747	0.0357381	0.12134	0.606417	0.378145	0.349611	0.492281	0.235476	0.12134	0.378145	0.26401	0.0072042	0.321077	0.321077	0.26401	0.092806
CDH169019_20161018_S_09A	M	X	R	-0.314188	-0.338784	-0.117426	-0.363379	-0.264998	-0.338784	-0.289593	-0.387974	-0.387974	-0.215807	-0.633928	-0.46176	-0.486356	-0.510951	-0.437165	-0.363379	-0.191212	-0.437165	-0.387974	-0.338784	-0.191212	-0.240402	-0.264998	-0.46176	-0.289593	-0.264998	-0.363379	-0.363379	-0.191212	-0.191212	-0.387974	-0.289593	-0.166616	-0.117426	-0.338784	-0.240402	-0.314188	-0.166616	0.00555124	-0.0928302
CDH169019_20161018_S_09B	M	X	R	-0.0577224	-0.00109311	-0.0577224	-0.114352	-0.255925	-0.0577224	-0.170981	-0.142666	-0.142666	-0.199296	-0.539071	-0.454127	-0.284239	-0.454127	-0.425813	-0.454127	-0.454127	-0.312554	-0.454127	-0.482442	-0.425813	-0.454127	-0.397498	-0.454127	-0.255925	-0.086037	0.14048	0.0838508	0.14048	0.480256	-0.00109311	0.5652	0.310368	0.536885	0.536885	0.423626	0.366997	0.282053	0.310368	0.253739
CDH169019_20161018_S_09C	M	X	L	-0.0329779	0.190888	0.0484278	-0.0126264	0.211239	0.292645	-0.0533293	-0.0533293	-0.0533293	-0.175438	-0.399303	-0.3586	-0.3586	-0.317898	-0.338249	-0.419655	-0.440006	-0.338249	-0.3586	-0.0126264	-0.134735	0.0484278	0.0484278	0.0891306	0.190888	0.333347	0.190888	0.455456	0.23159	0.557213	0.577564	0.679321	0.353699	0.190888	0.272293	0.720024	0.37405	0.536862	0.211239	0.0484278
CDH169019_20161018_S_21A	M	X	R	-0.0528154	0.027471	-0.0260533	-0.10634	-0.213388	-0.0795775	-0.0260533	-0.0260533	0.0542331	-0.0795775	0.482427	0.696524	0.482427	0.803573	0.482427	0.455665	0.13452	0.509189	0.107757	0.107757	-0.0260533	-0.0528154	-0.24015	-0.293675	-0.266912	-0.0260533	-0.213388	-0.24015	-0.347199	-0.186626	-0.133102	-0.133102	-0.347199	-0.133102	-0.10634	-0.24015	-0.0795775	-0.10634	-0.0795775	-0.0528154
CDH169019_20161018_S_25A	M	X	L	-0.0600337	-0.0200551	-0.0600337	-0.219948	-0.17997	-0.0200551	0.0599021	0.259795	0.259795	0.139859	0.139859	0.0998807	0.259795	0.139859	0.0599021	-0.0600337	-0.0200551	0.0199235	-0.139991	0.0599021	-0.17997	0.0199235	0.0998807	-0.259927	-0.17997	0.0599021	-0.0200551	-0.0600337	-0.100012	0.219817	0.0199235	0.179838	-0.0600337	-0.0200551	-0.17997	0.0599021	0.0998807	0.0599021	-0.0200551	-0.100012
EMR17001_20170705_S_03A	F	X	L	0.35907	-0.0881084	0.399723	0.318418	0.277765	-0.128761	0.115155	0.318418	0.19646	0.155807	0.277765	0.0338494	-0.00680317	-0.250719	0.277765	0.0745021	0.19646	0.115155	0.0745021	0.318418	0.155807	0.0338494	0.0745021	0.562333	0.602986	0.724944	0.19646	0.115155	0.35907	0.277765	0.318418	0.155807	0.277765	0.115155	-0.0474558	0.115155	-0.169414	0.440376	0.0745021	0.35907
EMR17001_20170705_S_07A	F	X	R	-0.137818	0.213709	0.143404	0.213709	0.776153	0.494931	0.565236	0.424626	0.213709	0.705847	0.143404	0.565236	0.00279325	0.284015	0.0730987	0.494931	0.00279325	0.0730987	0.143404	0.143404	0.143404	0.143404	0.00279325	0.0730987	0.213709	0.213709	0.00279325	-0.208123	0.00279325	0.213709	0.00279325	0.00279325	-0.0675122	-0.137818	-0.137818	-0.137818	0.35432	0.00279325	-0.278428	-0.0675122
EMR17001_20170705_S_07B	F		R	-0.124937	-0.221636	0.165159	0.06846	-0.124937	-0.221636	-0.221636	0.165159	0.165159	0.06846	0.165159	-0.221636	0.06846	0.165159	-0.124937	0.165159	0.06846	-0.124937	0.165159	-0.124937	-0.0282386	-0.0282386	-0.0282386	-0.124937	-0.0282386	-0.124937	-0.0282386	0.165159	0.06846	-0.0282386	-0.221636	-0.0282386	0.165159	-0.0282386	-0.0282386	-0.221636	0.06846	0.06846	-0.0282386	-0.124937
EMR17001_20170705_S_09A	F	X	L	0.00972329	-0.112139	0.314378	0.0706543	0.192516	0.314378	0.497171	0.619033	0.862757	0.619033	0.558102	0.497171	0.192516	0.192516	0.00972329	-0.0512077	-0.112139	-0.17307	-0.112139	-0.112139	-0.234001	-0.17307	-0.234001	-0.234001	-0.234001	-0.17307	-0.234001	-0.234001	-0.234001	-0.234001	-0.234001	-0.234001	-0.234001	-0.234001	-0.17307	-0.17307	-0.17307	-0.234001	-0.112139	-0.234001
EMR17001_20170705_S_09B	F	X	L	0.199934	0.00303276	-0.193868	0.101483	0.00303276	-0.0954179	0.199934	0.00303276	0.00303276	0.692187	0.00303276	-0.193868	-0.193868	-0.193868	-0.193868	-0.0954179	-0.0954179	-0.193868	-0.0954179	-0.0954179	-0.193868	0.00303276	0.00303276	-0.0954179	0.298385	0.00303276	0.199934	-0.193868	0.101483	-0.0954179	0.00303276	0.00303276	0.298385	-0.193868	0.00303276	-0.0954179	-0.0954179	-0.193868	-0.0954179	-0.0954179
EMR17001_20170705_S_11A	F		L	0.0157824	0.0157824	-0.0909324	0.0157824	0.335927	-0.197647	0.122497	-0.0909324	-0.0909324	0.122497	0.335927	-0.197647	0.0157824	0.0157824	-0.197647	-0.0909324	0.122497	-0.0909324	-0.0909324	0.122497	0.0157824	0.122497	-0.0909324	-0.197647	0.0157824	-0.197647	0.0157824	-0.0909324	0.229212	-0.0909324	0.0157824	0.229212	0.0157824	-0.0909324	0.0157824	0.122497	-0.0909324	0.229212	0.229212	0.442642
EMR17001_20170705_S_15A	F	X		-0.444552	-0.444552	-0.444552	-0.444552	-0.444552	-0.444552	-0.444552	-0.444552	-0.444552	-0.444552	-0.444552	-0.444552	-0.444552	-0.444552	-0.444552	-0.444552	-0.444552	-0.444552	-0.444552	-0.444552	-0.444552	-0.444552	-0.444552	-0.444552	-0.444552	-0.403158	-0.444552	-0.403158	-0.444552	-0.444552	-0.444552	-0.444552	-0.444552	-0.444552	-0.444552	-0.403158	-0.403158	-0.403158	-0.444552	-0.403158
EMR17001_20170705_S_15B	F			-0.126592	-0.126592	-0.159794	-0.159794	-0.159794	-0.159794	-0.126592	-0.159794	-0.159794	-0.159794	-0.159794	-0.159794	-0.159794	-0.159794	-0.159794	-0.159794	-0.159794	-0.159794	-0.159794	-0.159794	-0.159794	-0.159794	-0.159794	-0.159794	-0.159794	-0.159794	-0.159794	-0.159794	-0.159794	-0.159794	-0.159794	-0.159794	-0.159794	-0.159794	-0.159794	-0.159794	-0.159794	-0.159794	-0.159794	-0.159794
EMR17001_20170705_S_15C	F	X	R	-0.16758	-0.283183	-0.369886	-0.225381	-0.283183	-0.254282	-0.398787	-0.340985	-0.369886	-0.398787	-0.398787	-0.254282	-0.19648	-0.19648	-0.254282	-0.109778	0.00582577	0.0925284	0.265934	0.15033	0.612744	0.872852	0.959555	0.815051	1.19076	1.16186	1.50867	1.27746	1.45087	1.53757	1.68208	1.50867	1.21966	1.16186	1.39307	1.19076	1.65318	1.71098	1.47977	1.33527
EMR17001_20170705_S_17A	F	X	R	0.517743	0.18052	0.0681125	0.517743	0.0306433	-0.00682591	-0.156703	0.18052	0.367866	-0.00682591	0.18052	-0.0817643	0.517743	0.0681125	0.517743	0.480274	0.18052	0.143051	-0.0442951	0.217989	0.442804	0.18052	0.405335	-0.00682591	0.367866	0.18052	0.367866	0.143051	0.105582	0.255458	0.0681125	0.217989	0.480274	0.255458	0.367866	0.105582	0.105582	0.0681125	0.18052	0.255458
EMR17001_20170705_S_17B	F		L	-0.175019	-0.175019	-0.175019	-0.126496	0.0190704	-0.126496	-0.126496	-0.077974	-0.223541	-0.175019	-0.175019	-0.0294518	-0.175019	-0.272063	-0.320585	-0.369107	-0.272063	-0.272063	-0.223541	-0.320585	-0.175019	-0.369107	-0.320585	-0.272063	-0.175019	-0.369107	-0.175019	-0.320585	-0.272063	-0.175019	-0.272063	-0.272063	-0.223541	-0.126496	-0.320585	-0.272063	-0.320585	-0.272063	-0.272063	-0.272063
EMR17001_20170705_S_21A	F	X	L	0.532972	0.465915	0.398859	0.767671	0.667086	0.465915	0.499444	0.633558	1.00237	0.600029	0.8012	0.432387	0.432387	0.465915	0.465915	0.264745	0.298273	0.130631	0.264745	0.298273	0.36533	0.231216	0.499444	0.231216	0.231216	0.16416	-0.0705394	0.130631	0.499444	0.16416	0.499444	-0.00348253	0.633558	0.231216	0.298273	0.432387	0.532972	0.36533	0.398859	0.465915
EMR17001_20170705_S_21B	F		L	0.54718	0.133993	-0.128943	-0.128943	-0.0538185	-0.0538185	-0.0162562	-0.0162562	0.0213062	-0.0913809	0.096431	0.321805	-0.0538185	-0.166506	0.171556	0.0588686	-0.0538185	-0.0913809	-0.0913809	-0.128943	-0.0538185	-0.0162562	-0.0162562	-0.0913809	-0.166506	-0.128943	-0.128943	-0.128943	-0.0913809	0.096431	0.171556	0.133993	0.133993	0.171556	0.096431	0.0213062	0.096431	0.284243	0.284243	0.321805
EMR17001_20170705_S_23A	F	X	R	-0.189659	-0.129089	0.113189	0.113189	0.052619	0.052619	-0.280513	-0.219944	-0.129089	-0.280513	-0.341083	-0.189659	-0.250228	-0.189659	-0.250228	-0.129089	-0.159374	0.143473	0.173758	0.0829038	0.173758	0.325182	0.446321	0.113189	-0.00795046	0.173758	0.143473	0.0223343	0.204043	0.355467	0.264612	0.204043	0.264612	0.113189	0.0829038	-0.0382352	0.173758	0.143473	0.355467	-0.00795046
EMR17001_20170705_S_23B	F	X	L	-0.140903	0.141537	-0.140903	-0.0467561	0.141537	0.235683	-0.140903	0.0473904	0.141537	0.32983	-0.140903	-0.235049	-0.187976	-0.140903	0.141537	-0.282122	-0.0467561	0.0473904	0.0473904	0.0473904	0.0944636	-0.187976	-0.0938294	-0.0938294	0.376903	0.0944636	-0.0467561	-0.0938294	-0.140903	-0.0467561	0.0944636	0.000317118	0.0473904	0.18861	0.141537	-0.140903	-0.0938294	-0.235049	0.0473904	0.282757
EMR17001_20170705_S_23C	F	X	R	-0.0438	0.144017	0.00986198	-0.151124	-0.070631	-0.0438	-0.070631	0.090355	-0.0438	-0.016969	-0.124293	-0.151124	0.144017	0.090355	0.170848	0.305003	0.358665	0.197679	0.412327	0.331834	0.385496	0.412327	0.76113	0.546482	0.600144	0.707468	0.412327	0.358665	0.412327	0.278172	0.519651	0.412327	0.465989	0.465989	0.117186	0.197679	0.22451	0.00986198	0.063524	0.546482
EMR17001_20170705_S_25A	F		R	-0.102061	-0.102061	-0.102061	-0.102061	-0.102061	-0.102061	0.0835592	-0.00925098	-0.102061	-0.102061	-0.102061	0.0835592	-0.102061	-0.102061	-0.102061	-0.102061	-0.102061	-0.00925098	-0.00925098	-0.102061	-0.102061	-0.102061	-0.102061	-0.102061	-0.102061	-0.102061	-0.102061	-0.102061	-0.00925098	-0.102061	-0.102061	-0.102061	-0.102061	-0.102061	-0.102061	-0.102061	-0.102061	-0.102061	-0.102061	-0.102061
EMR17001_20170705_S_25B	F	X	R	-0.0779334	-0.116807	-0.116807	-0.116807	-0.116807	0.0775617	-0.0779334	-0.0779334	0.116436	-0.155681	-0.155681	-0.0779334	-0.000185837	-0.000185837	-0.0390596	0.271931	0.271931	0.271931	0.155309	0.310804	0.271931	0.427426	0.271931	0.349678	0.544047	0.505173	0.738416	0.505173	0.582921	0.621795	0.582921	0.660669	0.505173	0.544047	0.77729	0.621795	0.582921	0.699542	0.544047	0.505173
EMR17001_20170705_S_25C	F	X	L	0.286199	0.146307	0.496037	0.146307	0.53101	0.18128	0.356145	0.0763613	0.0413884	0.251226	0.286199	0.286199	0.251226	0.18128	-0.203422	0.0413884	0.321172	-0.0285576	0.0413884	0.146307	0.146307	0.00641539	-0.133477	-0.0985035	-0.0985035	0.0763613	0.111334	0.111334	0.111334	-0.133477	-0.378287	-0.343314	-0.378287	-0.273368	-0.0285576	-0.203422	-0.0635306	-0.0985035	-0.0635306	-0.168449
EMR17001_20170705_S_25D	F	X	L	0.421916	0.0859749	0.127968	0.127968	0.253945	-0.165981	0.253945	0.16996	0.211953	0.16996	0.16996	0.00198972	0.295938	0.0439823	-0.0400029	0.253945	-0.165981	-0.123988	0.00198972	-0.123988	0.0439823	0.127968	0.0439823	0.337931	0.0859749	0.0439823	0.0859749	0.00198972	0.0859749	0.0859749	-0.0819955	-0.0400029	-0.333951	0.0859749	0.253945	-0.291959	0.0439823	0.00198972	0.0439823	-0.123988
EMR17001_20170705_S_25E	F		L	0.0567182	-0.112369	0.000355677	-0.112369	-0.0560069	-0.168732	0.0567182	0.0567182	-0.0560069	-0.112369	0.0567182	0.169443	-0.168732	0.113081	0.000355677	-0.112369	-0.225095	-0.225095	0.000355677	-0.112369	-0.168732	0.000355677	-0.0560069	-0.168732	-0.112369	-0.112369	-0.225095	-0.0560069	-0.112369	0.113081	-0.168732	-0.225095	-0.112369	0.000355677	-0.225095	-0.0560069	-0.112369	0.000355677	-0.0560069	-0.168732
EMR17001_20170705_S_27A	F			-0.103357	-0.103357	-0.103357	-0.103357	-0.103357	-0.103357	-0.103357	-0.103357	-0.103357	-0.103357	-0.103357	-0.103357	-0.103357	-0.103357	-0.103357	-0.103357	-0.103357	-0.103357	-0.103357	-0.103357	-0.103357	-0.103357	-0.103357	-0.103357	-0.103357	-0.103357	-0.103357	-0.103357	-0.103357	-0.103357	-0.103357	-0.103357	-0.103357	-0.103357	-0.103357	-0.103357	-0.103357	-0.103357	-0.103357	-0.103357
EMR17001_20170705_S_27B	F		L	0.00533134	0.00533134	-0.137065	0.00533134	0.147728	0.00533134	0.147728	-0.137065	-0.137065	-0.137065	-0.137065	-0.137065	-0.137065	-0.137065	-0.137065	-0.137065	-0.137065	-0.137065	-0.137065	-0.137065	-0.137065	-0.137065	-0.137065	-0.137065	0.147728	0.00533134	0.00533134	-0.137065	-0.137065	-0.137065	0.00533134	-0.137065	0.00533134	-0.137065	0.00533134	0.00533134	-0.137065	-0.137065	-0.137065	-0.137065
EMR17001_20170705_S_27C	F	X	L	0.0835281	0.167431	0.167431	0.0835281	0.335236	0.335236	0.335236	0.167431	-0.000374688	0.419139	0.0835281	-0.0842774	0.167431	0.335236	0.167431	-0.000374688	0.251334	0.251334	0.335236	0.419139	0.0835281	-0.000374688	-0.0842774	0.335236	0.167431	-0.0842774	0.167431	0.335236	-0.000374688	-0.000374688	0.335236	-0.000374688	-0.000374688	0.167431	0.167431	0.0835281	-0.16818	0.167431	0.419139	0.167431
EMR17001_20170705_S_27D	F		R	-0.0859141	-0.0859141	-0.0859141	-0.0859141	-0.0859141	-0.0859141	-0.0859141	-0.0859141	-0.0859141	-0.0859141	-0.0859141	-0.0859141	-0.0859141	-0.0859141	-0.0859141	0.0988822	-0.0859141	-0.0859141	-0.0859141	-0.0859141	-0.0859141	-0.0859141	-0.0859141	-0.0859141	-0.0859141	-0.0859141	-0.0859141	-0.0859141	-0.0859141	-0.0859141	-0.0859141	-0.0859141	-0.0859141	-0.0859141	-0.0859141	-0.0859141	-0.0859141	-0.0859141	-0.0859141	-0.0859141
EMR17001_20170705_S_29A	F	X	L	0.545599	0.128229	-0.010894	0.499225	0.174604	0.174604	0.267352	0.174604	0.174604	0.0818548	0.174604	-0.242766	0.220978	-0.0572685	0.0354804	0.0818548	-0.103643	0.174604	-0.0572685	0.0354804	0.128229	0.174604	0.174604	0.174604	0.499225	0.360101	0.313727	0.45285	0.220978	0.267352	0.220978	0.0354804	0.174604	0.128229	0.313727	0.128229	0.0818548	0.267352	0.545599	0.220978
EMR17001_20170705_S_31A	F	X	L	0.299922	-0.0546521	0.0339914	0.388565	0.299922	0.0339914	0.122635	-0.143296	0.0339914	0.299922	-0.143296	-0.0546521	0.0339914	-0.143296	-0.0546521	-0.0546521	-0.143296	0.0339914	0.0339914	0.0339914	0.122635	0.211278	-0.0546521	-0.231939	0.299922	0.299922	0.211278	0.299922	0.122635	0.122635	-0.143296	-0.0546521	0.0339914	0.211278	0.122635	-0.0546521	0.122635	-0.0546521	-0.0546521	0.0339914
EMR17002_20170824_S_01A	F	X	L	0.0749814	0.0982092	-0.0876132	0.0982092	0.121437	0.121437	0.0285258	0.005298	0.260804	0.005298	0.562765	0.237576	0.19112	0.237576	0.144665	0.353715	0.376943	0.144665	0.237576	0.307259	0.144665	0.237576	0.376943	0.144665	0.0982092	0.121437	0.0749814	0.005298	-0.0876132	-0.0411576	0.121437	0.0982092	0.353715	0.144665	0.121437	-0.0411576	0.0749814	0.0517536	-0.110841	0.237576
EMR17002_20170824_S_05A	F	X	R	0.239071	0.319394	0.453265	0.292619	0.118587	0.131974	-0.0956067	-0.149155	-0.283026	-0.269639	-0.430284	-0.390123	-0.256252	-0.296413	-0.296413	-0.3098	-0.336575	-0.202704	0.0114901	-0.0554454	-0.189316	-0.0688325	0.0650386	0.0784257	0.185523	-0.00189698	0.131974	0.0784257	0.252458	0.172135	0.131974	0.131974	0.1052	0.172135	0.145361	0.212297	0.158748	0.118587	0.145361	0.172135
EMR17002_20170824_S_07A	F	X	R	0.0956068	0.0511289	-0.17126	-0.0823045	-0.0823045	0.0511289	-0.0823045	-0.0823045	0.0511289	0.317996	0.0511289	0.362474	0.451429	0.273518	0.540385	0.451429	0.629341	0.940685	0.673818	0.362474	0.22904	0.273518	0.451429	0.0956068	-0.126782	0.22904	-0.0378267	0.184562	-0.126782	-0.126782	-0.17126	-0.215738	-0.17126	-0.126782	-0.126782	-0.126782	-0.126782	-0.126782	-0.0378267	-0.0823045
EMR17002_20170824_S_09A	F	X	L	0.199899	0.0174015	0.100355	0.21649	-0.115324	-0.165096	-0.231459	-0.297821	-0.331003	-0.364184	-0.430547	-0.496909	-0.463728	-0.463728	-0.413956	-0.480319	-0.463728	-0.430547	-0.430547	-0.430547	-0.413956	-0.463728	-0.397365	-0.380775	-0.397365	-0.397365	-0.430547	-0.430547	-0.5135	-0.5135	-0.496909	-0.530091	-0.496909	-0.463728	-0.397365	-0.463728	-0.463728	-0.397365	-0.463728	-0.463728
EMR17002_20170824_S_09B	F	X	R	-0.288913	-0.0364363	-0.0364363	0.0266829	-0.0364363	-0.194234	-0.067996	-0.415152	-0.257354	-0.288913	-0.225794	-0.320473	-0.131115	-0.320473	0.0898021	-0.00487672	0.0266829	0.121362	0.373839	0.184481	0.0582425	0.0898021	0.31072	0.27916	-0.0995556	0.184481	0.152921	0.0898021	0.152921	0.0582425	0.0898021	0.405398	-0.0995556	0.0582425	-0.0364363	-0.00487672	0.0898021	-0.225794	-0.0364363	-0.162675
EMR17002_20170824_S_11A	F	X	L	-0.217492	0.178887	0.0302445	-0.0688502	0.0797918	-0.0193029	0.0797918	-0.26704	-0.217492	-0.217492	-0.26704	-0.167945	-0.217492	-0.26704	-0.26704	-0.217492	-0.217492	-0.217492	-0.26704	-0.167945	-0.217492	-0.217492	-0.217492	-0.217492	-0.217492	-0.217492	-0.118398	-0.118398	-0.217492	-0.118398	-0.26704	-0.26704	-0.217492	-0.167945	-0.167945	-0.217492	-0.167945	-0.217492	-0.26704	-0.167945
EMR17002_20170824_S_11B	F		L	-0.0961733	-0.0359568	0.0242598	0.0844763	0.0242598	-0.15639	0.0242598	-0.216606	0.0242598	0.0844763	-0.0359568	-0.0359568	0.0242598	0.0242598	0.0242598	0.144693	0.0242598	-0.0359568	0.0242598	-0.0961733	-0.15639	0.144693	0.0844763	0.0242598	-0.0359568	-0.0359568	0.0844763	-0.15639	-0.0359568	0.0844763	0.204909	0.0242598	0.0242598	-0.0961733	-0.216606	0.0242598	-0.0359568	0.204909	-0.0961733	0.0844763
EMR17002_20170824_S_23A	F		L	-0.0462437	8.81381e-05	-0.0925755	0.0464199	0.139084	0.0927518	8.81381e-05	-0.0462437	0.139084	0.0464199	-0.0462437	8.81381e-05	-0.138907	-0.138907	-0.0462437	-0.0925755	0.0464199	-0.138907	-0.0462437	-0.138907	-0.138907	-0.138907	-0.0925755	-0.231571	-0.185239	-0.138907	-0.0462437	-0.138907	-0.138907	0.0464199	-0.138907	0.139084	-0.185239	-0.138907	-0.0925755	0.0464199	0.185415	8.81381e-05	-0.138907	-0.138907
EMR17002_20170824_S_23B	F	X	L	-0.217179	-0.282616	-0.151742	-0.249898	-0.151742	-0.151742	-0.0863046	-0.119023	-0.315335	0.142726	0.240882	0.175444	0.0118512	0.0772885	0.0118512	-0.0208674	0.0772885	0.110007	-0.119023	0.0118512	-0.18446	0.0118512	-0.0208674	-0.0863046	-0.151742	-0.119023	0.0445699	-0.217179	-0.217179	-0.249898	-0.18446	-0.18446	-0.0208674	-0.151742	-0.119023	-0.0863046	-0.151742	-0.053586	-0.217179	-0.18446
EMR17002_20170824_S_27A	F		R	-0.326495	-0.326495	-0.326495	-0.326495	-0.326495	-0.326495	-0.326495	-0.326495	-0.326495	-0.326495	-0.326495	-0.326495	-0.326495	-0.326495	-0.326495	-0.326495	-0.326495	-0.290994	-0.326495	-0.326495	-0.326495	-0.326495	-0.326495	-0.290994	-0.290994	-0.290994	-0.290994	-0.326495	-0.219992	-0.255493	-0.113489	-0.113489	-0.184491	-0.255493	-0.184491	-0.184491	-0.184491	-0.219992	-0.14899	-0.219992
EMR17002_20170824_S_31A	F	X	L	-0.237823	-0.140611	-0.205419	-0.205419	-0.302632	-0.302632	-0.205419	-0.205419	-0.173015	0.442665	-0.108206	0.0862189	-0.0758021	-0.108206	-0.237823	-0.0433979	-0.173015	-0.108206	0.0214105	-0.0433979	-0.140611	0.0214105	-0.140611	0.0538147	-0.0109937	0.0214105	0.0214105	0.0862189	0.0214105	-0.0433979	0.151027	0.280644	0.475069	0.24824	0.313048	0.313048	0.24824	0.24824	0.539878	0.24824
EMR17003_20170612_S_05A	F		R	-0.173231	-0.0838532	-0.0838532	0.00552476	-0.0838532	-0.0838532	-0.0838532	-0.173231	0.00552476	-0.0838532	-0.173231	-0.173231	0.00552476	-0.0838532	-0.173231	-0.0838532	0.00552476	0.00552476	-0.0838532	-0.0838532	-0.0838532	-0.0838532	0.00552476	-0.0838532	-0.0838532	-0.0838532	-0.0838532	-0.173231	-0.173231	0.00552476	-0.173231	-0.173231	0.00552476	-0.173231	-0.0838532	-0.0838532	-0.173231	-0.0838532	-0.173231	-0.0838532
EMR17003_20170612_S_09A	F	X	R	-0.246867	0.198881	0.236026	-0.0982846	0.124589	-0.39545	0.0131523	-0.284013	-0.172576	-0.209722	-0.246867	-0.321158	-0.284013	-0.358304	-0.284013	-0.284013	-0.321158	-0.321158	-0.284013	-0.39545	-0.39545	-0.209722	-0.172576	-0.209722	-0.0982846	-0.172576	-0.284013	-0.172576	-0.469741	-0.172576	-0.321158	-0.321158	-0.172576	-0.061139	-0.246867	-0.13543	-0.0982846	-0.0239933	-0.0239933	0.161735
EMR17003_20170612_S_09B	F	X	R	-0.25856	-0.301979	-0.215141	-0.345398	-0.25856	-0.25856	-0.25856	0.0887937	0.00195524	-0.0848832	-0.041464	0.00195524	-0.0848832	-0.388818	-0.215141	-0.215141	-0.215141	-0.345398	-0.25856	-0.301979	-0.128302	-0.25856	-0.171722	-0.301979	-0.388818	-0.215141	-0.345398	-0.301979	-0.432237	-0.345398	-0.25856	-0.215141	-0.25856	-0.301979	-0.25856	-0.345398	-0.215141	-0.301979	-0.215141	-0.345398
EMR17003_20170612_S_11A	F		L	0.0281602	-0.23073	0.0799382	0.0799382	-0.0753958	0.0281602	0.183494	-0.0753958	0.235272	0.0281602	-0.0753958	-0.178952	-0.127174	-0.127174	0.235272	0.0799382	0.0281602	-0.127174	-0.0753958	-0.0236178	-0.0753958	0.131716	0.0281602	-0.127174	0.0799382	-0.127174	-0.0753958	-0.0236178	-0.178952	-0.23073	-0.0236178	-0.178952	-0.178952	-0.0753958	-0.0753958	-0.282508	-0.23073	-0.127174	-0.0236178	-0.0753958
EMR17003_20170612_S_13A	F	X	R	-0.0465907	0.0716312	0.0716312	-0.105702	-0.0465907	-0.164813	-0.105702	-0.105702	-0.0465907	0.0125202	-0.105702	-0.0465907	0.0125202	0.189853	0.0125202	-0.164813	0.0125202	-0.105702	0.0125202	-0.223924	0.0125202	0.189853	-0.164813	0.0125202	-0.164813	0.130742	0.0125202	-0.0465907	0.0125202	0.308075	0.130742	0.0716312	0.130742	0.308075	0.189853	0.60363	0.721851	0.780962	0.544519	0.426297
EMR17003_20170612_S_17A	F	X	L	0.114784	-0.0607392	0.0270226	-0.0168583	-0.192382	0.202546	0.37807	0.114784	0.0709035	0.114784	0.114784	0.246427	-0.0607392	0.290308	0.246427	0.290308	0.246427	0.114784	0.246427	0.158665	-0.0168583	0.114784	0.290308	0.0709035	0.290308	0.246427	0.290308	0.290308	0.0270226	-0.192382	-0.0168583	-0.0168583	-0.0607392	-0.0168583	0.0270226	0.290308	-0.236263	-0.324025	-0.0168583	-0.192382
EMR17003_20170612_S_17B	F	X	L	0.553395	0.337168	0.164186	0.683132	0.466904	0.250677	0.683132	0.164186	0.466904	0.51015	0.423659	0.553395	0.683132	0.639886	0.596641	1.0291	0.466904	0.899359	0.639886	0.812868	0.769623	0.466904	0.942605	0.553395	0.553395	0.639886	0.423659	0.596641	0.726377	0.250677	0.293922	0.726377	0.293922	0.250677	0.466904	0.466904	0.51015	0.164186	0.077695	0.12094
EMR17003_20170612_S_17C	F	X	R	-0.140075	0.158966	-0.140075	-0.140075	-0.0403947	-0.140075	-0.0403947	-0.239756	-0.0403947	-0.289596	-0.140075	-0.0902349	-0.0403947	-0.140075	0.109126	0.0592858	0.0592858	-0.0902349	0.158966	0.00944558	0.158966	0.109126	-0.289596	0.158966	0.158966	0.208807	0.208807	0.208807	0.408168	0.607528	0.707209	0.00944558	0.308487	0.258647	0.507848	0.408168	0.458008	0.557688	0.458008	0.607528
EMR17003_20170612_S_19A	F	X	L	-0.161605	0.0370888	-0.227837	0.10332	-0.0953739	-0.161605	-0.227837	0.10332	0.169551	-0.0953739	0.10332	-0.161605	0.10332	0.169551	-0.0291426	0.0370888	-0.0953739	0.235783	-0.0291426	0.10332	0.169551	0.10332	-0.0953739	0.169551	-0.0953739	0.0370888	0.169551	-0.0291426	0.169551	0.235783	0.10332	-0.161605	-0.227837	-0.0953739	0.10332	0.0370888	-0.0291426	0.0370888	0.169551	-0.0291426
EMR17003_20170612_S_21A	F	X	L	0.193775	0.127226	-0.00587204	-0.072421	-0.00587204	-0.13897	0.0606769	-0.072421	-0.13897	-0.13897	-0.205519	-0.13897	-0.072421	-0.00587204	-0.13897	-0.072421	-0.00587204	-0.00587204	-0.072421	0.0606769	0.260324	0.127226	-0.00587204	0.193775	0.127226	-0.072421	0.127226	0.127226	-0.13897	0.127226	-0.13897	-0.13897	-0.072421	-0.00587204	-0.072421	-0.13897	-0.205519	-0.205519	-0.205519	-0.072421
EMR17003_20170612_S_21B	F	X	R	-0.0106367	-0.195454	-0.287862	-0.103045	-0.287862	-0.14925	0.0355676	-0.056841	-0.056841	-0.195454	-0.195454	-0.056841	-0.287862	-0.14925	-0.056841	-0.14925	-0.287862	-0.287862	-0.14925	-0.103045	-0.241658	-0.195454	-0.14925	-0.287862	-0.334067	-0.195454	-0.195454	-0.14925	-0.287862	-0.195454	-0.103045	-0.14925	-0.14925	-0.103045	-0.103045	-0.241658	-0.241658	-0.334067	-0.241658	-0.334067
EMR17003_20170612_S_23A	F	X	R	-0.239929	-0.0834007	0.073128	-0.0834007	-0.0834007	0.073128	-0.161665	-0.0834007	-0.0834007	-0.0834007	-0.239929	-0.161665	-0.161665	-0.161665	-0.161665	0.073128	-0.0051364	-0.0834007	-0.161665	-0.239929	-0.0834007	-0.239929	-0.0051364	-0.0834007	-0.161665	-0.161665	-0.161665	-0.161665	-0.239929	-0.161665	-0.0051364	-0.239929	-0.239929	-0.161665	-0.0834007	-0.0834007	-0.161665	-0.0834007	-0.0051364	0.073128
EMR17003_20170612_S_23B	F	X	L	-0.120541	-0.190366	-0.190366	-0.260191	-0.260191	-0.120541	-0.190366	-0.0507159	-0.120541	-0.260191	-0.260191	-0.260191	-0.190366	-0.260191	-0.260191	-0.190366	-0.260191	-0.260191	-0.190366	-0.260191	-0.260191	-0.190366	-0.260191	-0.260191	-0.120541	-0.190366	-0.190366	-0.260191	-0.120541	-0.190366	-0.190366	-0.260191	-0.260191	-0.120541	-0.260191	-0.260191	-0.120541	-0.260191	-0.190366	-0.190366
EMR17003_20170612_S_25A	F	X	L	-0.290354	-0.0890716	-0.0488151	-0.290354	-0.209841	-0.290354	-0.290354	-0.00855865	0.0719543	-0.0488151	0.152467	0.0719543	0.0719543	-0.129328	-0.0890716	-0.0488151	-0.290354	-0.290354	-0.169585	-0.129328	-0.209841	-0.370867	-0.209841	-0.290354	-0.370867	-0.290354	-0.411123	-0.411123	-0.411123	-0.370867	-0.330611	-0.370867	-0.370867	-0.330611	-0.411123	-0.411123	-0.330611	-0.330611	-0.370867	-0.411123
EMR17003_20170612_S_25B	F			-0.19885	-0.111969	-0.111969	0.0617928	0.148674	-0.111969	-0.111969	-0.111969	-0.111969	-0.19885	-0.19885	-0.19885	-0.111969	-0.0250882	-0.0250882	-0.0250882	-0.0250882	-0.111969	-0.111969	-0.111969	-0.0250882	-0.111969	-0.111969	-0.0250882	-0.111969	-0.111969	-0.111969	-0.19885	-0.19885	-0.111969	-0.111969	-0.111969	-0.19885	-0.0250882	-0.0250882	-0.19885	-0.0250882	-0.111969	-0.111969	-0.111969
EMR17003_20170612_S_27A	F		R	-0.0816662	0.0221418	0.0221418	-0.0816662	0.0221418	0.229758	0.12595	-0.0816662	-0.0816662	-0.185474	-0.185474	-0.0816662	0.0221418	-0.0816662	0.0221418	0.0221418	-0.0816662	-0.0816662	-0.0816662	0.0221418	-0.0816662	-0.0816662	0.12595	0.12595	-0.185474	0.0221418	-0.185474	-0.185474	-0.0816662	-0.185474	-0.0816662	-0.0816662	-0.185474	-0.0816662	0.229758	-0.185474	0.0221418	-0.185474	-0.0816662	-0.185474
EMR17003_20170612_S_29A	F	X	L	-0.16811	-0.0562353	-0.0562353	-0.084204	-0.0282665	0.0836087	-0.0282665	0.111577	0.0276711	-0.112173	-0.000297694	-0.084204	-0.0282665	0.0276711	0.0556399	0.111577	0.307359	0.111577	0.419234	0.307359	0.391265	0.447203	0.419234	0.754859	0.698922	0.866735	0.782828	1.11845	1.03455	1.14642	1.31424	1.56595	1.17439	1.39814	1.62189	1.45408	1.67783	1.62189	1.84564	1.92955
EMR17004_20170807_S_03A	F		L	-0.314104	-0.228566	-0.271335	-0.228566	-0.314104	-0.228566	-0.228566	-0.228566	-0.271335	-0.314104	-0.271335	-0.356873	-0.185797	-0.143028	0.113586	0.113586	0.113586	0.0280482	-0.100259	-0.0147208	0.0708172	-0.100259	0.156355	0.0280482	0.455738	0.584045	0.669583	0.412969	0.755121	0.79789	0.455738	0.755121	0.79789	0.669583	0.712352	0.498507	0.455738	0.498507	0.626814	0.79789
EMR17004_20170807_S_03B	F	X	R	-0.0902755	0.374544	0.0259295	0.374544	-0.148378	0.0840319	-0.0902755	0.142134	0.374544	-0.0902755	0.0259295	0.258339	0.490749	0.258339	0.432647	0.374544	0.200237	0.606954	0.142134	0.0840319	0.258339	0.258339	-0.0902755	0.258339	0.200237	0.142134	0.0259295	0.142134	0.0840319	-0.148378	0.0840319	-0.032173	0.0259295	-0.0902755	-0.148378	-0.0902755	-0.032173	-0.20648	-0.148378	-0.0902755
EMR17004_20170807_S_07A	F	X		-0.158274	-0.158274	-0.158274	-0.0372033	-0.0372033	-0.0372033	0.0838671	0.0838671	0.204937	-0.0372033	0.447078	-0.0372033	-0.0372033	0.204937	-0.158274	0.0838671	-0.0372033	-0.0372033	0.326008	0.0838671	0.0838671	0.204937	0.0838671	0.0838671	0.0838671	0.0838671	-0.0372033	-0.158274	-0.158274	-0.0372033	-0.158274	-0.158274	-0.0372033	-0.158274	-0.0372033	-0.158274	0.0838671	-0.0372033	-0.158274	0.0838671
EMR17004_20170807_S_09A	F	X	R	-0.195855	-0.143314	-0.248396	-0.0382325	-0.248396	-0.300937	-0.0382325	-0.0382325	-0.195855	0.0143084	0.224472	0.277013	0.0143084	-0.0382325	0.382095	0.0143084	0.224472	-0.0382325	0.329554	-0.0382325	-0.0907734	-0.0907734	-0.0382325	-0.0382325	-0.0907734	-0.0382325	-0.0907734	-0.248396	-0.248396	-0.0907734	-0.0907734	-0.143314	-0.0907734	-0.143314	-0.143314	-0.143314	-0.300937	-0.143314	0.171931	-0.143314
EMR17004_20170807_S_11A	F	X	L	-0.135609	-0.220566	-0.050653	-0.305522	0.416607	0.204216	0.374128	0.11926	-0.00817485	0.11926	0.11926	0.0767814	-0.263044	-0.348	-0.220566	-0.178087	-0.305522	-0.348	-0.263044	-0.348	-0.178087	-0.263044	-0.348	-0.305522	-0.220566	-0.220566	-0.263044	-0.050653	-0.305522	-0.135609	-0.00817485	-0.305522	-0.178087	0.0343033	-0.178087	-0.263044	-0.220566	-0.263044	-0.220566	-0.220566
EMR17004_20170807_S_17A	F	X	L	0.163686	0.0814346	0.191103	0.355606	0.0266004	-0.0282338	-0.247571	-0.000816711	-0.0556509	0.0266004	0.0540175	-0.0556509	0.0266004	-0.0830681	0.328189	0.108852	0.0540175	0.0540175	-0.0282338	-0.0556509	0.136269	0.0814346	-0.110485	-0.137902	-0.192737	-0.412073	-0.110485	-0.000816711	-0.192737	-0.192737	-0.220154	-0.000816711	-0.274988	0.0814346	-0.165319	-0.302405	-0.412073	-0.220154	-0.302405	-0.274988
EMR17006_20170615_S_01A	M	X	R	0.209064	0.289502	0.450378	0.450378	0.128626	0.450378	0.289502	0.933007	0.209064	0.289502	0.691693	0.611255	0.289502	0.530817	0.128626	0.0481881	0.128626	0.450378	0.0481881	0.36994	0.128626	0.36994	0.0481881	0.933007	0.530817	0.289502	0.611255	0.530817	0.611255	0.128626	0.450378	0.36994	0.530817	0.0481881	0.128626	0.36994	0.128626	0.0481881	0.128626	0.0481881
EMR17006_20170615_S_03A	M		L	-0.182082	0.0103388	-0.246222	0.0103388	-0.246222	-0.117941	0.0103388	-0.117941	-0.246222	0.0103388	-0.0538013	-0.117941	-0.0538013	-0.438642	-0.0538013	-0.0538013	-0.117941	-0.246222	-0.246222	-0.182082	-0.182082	-0.310362	-0.0538013	0.0744789	-0.374502	-0.246222	0.0103388	-0.117941	-0.246222	0.0103388	-0.374502	-0.182082	-0.182082	-0.310362	-0.182082	0.0744789	0.0103388	-0.182082	-0.246222	0.0103388
EMR17006_20170615_S_05A	M	X	R	-0.431831	-0.393518	-0.546769	-0.508456	-0.546769	-0.470143	-0.546769	-0.508456	-0.546769	-0.508456	-0.546769	-0.546769	-0.546769	-0.546769	-0.546769	-0.546769	-0.508456	-0.546769	-0.508456	-0.546769	-0.508456	-0.546769	-0.546769	-0.546769	-0.546769	-0.508456	-0.546769	-0.508456	-0.546769	-0.508456	-0.508456	-0.546769	-0.546769	-0.508456	-0.508456	-0.546769	-0.470143	-0.546769	-0.546769	-0.470143
EMR17006_20170615_S_07A	M		L	0.0383303	-0.211686	-0.211686	-0.211686	-0.211686	-0.0866777	-0.211686	-0.0866777	-0.211686	-0.211686	-0.211686	-0.211686	-0.211686	-0.0866777	-0.211686	-0.0866777	-0.0866777	-0.211686	0.0383303	-0.211686	-0.211686	-0.211686	-0.0866777	-0.0866777	-0.0866777	-0.0866777	-0.211686	0.0383303	-0.0866777	0.0383303	0.413354	-0.211686	-0.0866777	-0.0866777	-0.0866777	-0.0866777	-0.0866777	-0.211686	-0.0866777	0.0383303
EMR17006_20170615_S_09A	M	X	R	0.822388	0.5796	0.5796	0.518904	0.21542	0.883085	0.39751	0.458207	0.336813	0.276116	0.700994	0.640297	0.943781	1.55075	1.00448	1.42936	1.79354	2.27911	2.21841	2.4005	2.64329	3.25026	2.76469	2.33981	2.33981	2.09702	2.15772	1.24727	1.61145	0.943781	0.943781	0.700994	0.5796	0.883085	0.276116	0.39751	0.518904	0.154723	0.154723	0.0333291
EMR17006_20170615_S_09B	M		R	-0.000241579	0.0714277	0.0714277	-0.000241579	-0.14358	-0.0719108	-0.14358	-0.215249	-0.14358	-0.14358	-0.14358	-0.286919	-0.358588	-0.215249	-0.000241579	-0.215249	-0.14358	0.143097	0.214766	0.214766	0.358105	0.429774	1.00313	0.716451	0.859789	1.14647	1.43314	1.0748	0.859789	0.358105	0.286435	0.573112	0.286435	0.501443	0.214766	0.214766	0.0714277	-0.0719108	-0.14358	-0.215249
EMR17006_20170615_S_11A	M		L	0.0801253	-0.0451034	0.205354	0.14274	-0.0451034	0.0175109	0.0801253	-0.107718	-0.107718	-0.170332	0.0801253	-0.107718	-0.170332	-0.232946	-0.232946	-0.295561	-0.295561	-0.232946	-0.295561	-0.232946	-0.232946	-0.107718	-0.295561	-0.170332	-0.295561	-0.295561	-0.170332	-0.232946	-0.295561	-0.232946	-0.295561	-0.295561	-0.232946	-0.295561	-0.295561	-0.295561	-0.295561	-0.107718	-0.295561	-0.232946
EMR17006_20170615_S_11B	M	X	R	0.157848	0.00553548	0.157848	0.0563064	0.614787	0.411703	0.513245	0.7671	0.817871	1.07173	1.1225	1.1225	1.22404	0.817871	0.665558	0.614787	0.360932	0.310161	0.157848	-0.0960064	-0.29909	-0.29909	-0.349861	-0.349861	-0.400632	-0.349861	-0.248319	-0.451403	-0.349861	-0.400632	-0.248319	-0.197548	-0.146777	-0.349861	-0.0452355	-0.197548	-0.29909	-0.451403	-0.146777	-0.248319
EMR17006_20170615_S_11C	M		L	-0.120713	0.0430786	0.370662	0.370662	0.698245	0.288766	0.124974	0.124974	-0.0388172	-0.120713	-0.202609	-0.202609	-0.120713	-0.202609	0.124974	0.0430786	-0.202609	-0.202609	-0.202609	-0.202609	-0.120713	-0.202609	-0.202609	-0.202609	-0.202609	-0.202609	-0.202609	-0.202609	-0.202609	-0.202609	-0.202609	-0.202609	-0.202609	-0.202609	-0.120713	-0.202609	-0.120713	-0.202609	-0.202609	-0.120713
EMR17006_20170615_S_11D	M			-0.111663	-0.111663	-0.111663	-0.111663	-0.111663	-0.111663	-0.111663	-0.111663	-0.111663	-0.111663	-0.111663	-0.111663	-0.111663	-0.111663	-0.111663	-0.111663	-0.111663	-0.111663	-0.111663	-0.111663	-0.111663	-0.111663	-0.111663	-0.111663	-0.111663	-0.111663	-0.111663	-0.111663	-0.111663	-0.111663	-0.111663	-0.111663	-0.111663	-0.111663	-0.111663	-0.111663	-0.111663	-0.111663	-0.111663	-0.111663
EMR17006_20170615_S_13A	M	X	L	0.536995	0.57691	0.616824	0.417252	0.57691	0.417252	0.457167	0.736567	0.417252	0.337423	-0.101635	0.137851	-0.14155	-0.14155	-0.14155	0.0580223	0.0181078	-0.061721	0.0979367	0.0181078	0.0181078	-0.0218066	0.0580223	0.177766	0.0979367	0.177766	0.736567	0.137851	0.457167	0.0181078	0.377338	0.257594	-0.0218066	0.297509	0.0181078	-0.14155	0.0979367	-0.221379	-0.420951	-0.221379
EMR17006_20170615_S_15A	M	X	L	0.0335828	0.277128	-0.209962	-0.0992599	-0.387086	-0.519929	-0.165681	-0.1214	-0.143541	0.36569	-0.0106981	-0.054979	-0.232103	0.0114424	-0.519929	-0.320665	-0.232103	-0.364945	-0.0106981	-0.143541	0.0778638	0.0557233	0.210707	-0.232103	0.100004	-0.1214	-0.1214	-0.0771195	-0.209962	-0.187822	-0.342805	-0.298524	-0.409226	-0.320665	-0.431367	-0.475648	-0.674912	-0.431367	-0.320665	-0.342805
EMR17006_20170615_S_15B	M	X	L	0.14184	0.17687	0.14184	0.281959	0.842435	0.982554	1.01758	1.08764	1.40291	0.912495	0.422078	0.457108	0.0367507	0.0017209	0.14184	-0.0683386	0.246929	-0.0333089	0.10681	-0.0683386	0.2119	-0.0683386	0.0367507	0.17687	-0.138398	0.10681	-0.0683386	-0.103368	0.0717804	-0.173428	-0.173428	-0.173428	-0.138398	-0.103368	-0.103368	-0.103368	-0.103368	-0.0333089	-0.348577	-0.0333089
EMR17006_20170615_S_17A	M	X	R	0.245843	0.615038	0.896329	1.08972	0.333747	0.491973	-0.123351	-0.299158	-0.000286336	-0.228835	-0.140932	0.0700364	0.0172943	0.474392	0.0876171	0.0524557	0.0876171	0.105198	0.210682	0.245843	0.351327	0.105198	0.298585	0.42165	0.228263	0.456811	0.140359	0.122778	0.0876171	0.034875	0.228263	-0.0881898	-0.193674	0.316166	-0.0706091	0.0172943	-0.211255	-0.176093	0.0172943	-0.281577
EMR17006_20170615_S_17B	M	X	L	0.277868	0.471302	0.0844344	0.0360759	-0.350792	-0.205716	-0.157358	-0.39915	-0.447509	-0.39915	-0.302433	-0.39915	-0.495867	-0.447509	-0.39915	-0.350792	-0.39915	-0.350792	-0.39915	-0.39915	-0.350792	-0.302433	-0.302433	-0.157358	-0.254075	-0.205716	-0.254075	-0.205716	-0.157358	-0.302433	-0.254075	-0.302433	-0.350792	-0.39915	-0.302433	-0.39915	-0.495867	-0.350792	-0.447509	-0.205716
EMR17006_20170615_S_23A	M	X	L	0.303598	0.246682	0.360515	0.161307	0.189765	0.303598	0.360515	0.388973	0.388973	0.702015	0.10439	0.246682	0.161307	-0.123276	-0.180193	-0.0663597	-0.436318	-0.151735	0.132849	-0.379401	-0.464776	-0.265568	-0.550151	-0.350943	-0.23711	-0.294026	-0.0379013	-0.265568	-0.23711	-0.23711	-0.180193	0.218224	0.10439	0.161307	-0.00944301	0.303598	0.388973	-0.0379013	0.0190153	0.332057
EMR17006_20170615_S_25A	M	X	L	0.386212	0.575226	0.701236	1.07927	1.45729	1.14227	1.5203	1.39429	1.01626	1.89833	3.53645	1.45729	0.575226	0.701236	0.0711873	0.0711873	0.197197	-0.117827	-0.243837	-0.306842	-0.180832	-0.180832	-0.180832	-0.243837	-0.117827	-0.243837	-0.306842	-0.0548224	-0.369847	-0.243837	-0.180832	-0.180832	-0.306842	-0.243837	-0.117827	0.00818245	-0.117827	-0.0548224	0.197197	0.260202
EMR17006_20170615_S_27A	M	X	R	0.0326873	0.0989837	-0.232498	-0.265646	-0.000460841	-0.0999054	0.132132	-0.000460841	-0.0999054	-0.0667572	0.16528	0.0989837	-0.0667572	-0.000460841	-0.166202	-0.265646	0.0326873	-0.331943	-0.331943	-0.398239	-0.398239	-0.431387	-0.431387	-0.597128	-0.630276	-0.530832	-0.431387	-0.530832	-0.56398	-0.464535	-0.431387	-0.398239	-0.530832	-0.497683	-0.56398	-0.431387	-0.398239	-0.530832	-0.497683	-0.431387
EMR17006_20170615_S_27B	M	X	L	-0.136919	-0.441845	-0.374083	-0.238561	-0.407964	-0.374083	-0.407964	-0.340203	-0.577367	-0.272442	-0.441845	-0.306322	-0.441845	-0.543486	-0.441845	-0.543486	-0.543486	-0.509606	-0.475725	-0.475725	-0.577367	-0.509606	-0.577367	-0.611248	-0.645128	-0.611248	-0.645128	-0.645128	-0.645128	-0.645128	-0.577367	-0.611248	-0.611248	-0.577367	-0.645128	-0.543486	-0.645128	-0.611248	-0.509606	-0.611248
EMR17006_20170615_S_31A	M	X	L	0.0328012	0.201786	0.201786	0.314442	0.0328012	0.0328012	0.0891294	-0.0798552	-0.0798552	1.49733	0.765068	0.0328012	-0.023527	-0.0798552	-0.0798552	0.0328012	-0.0798552	0.145458	0.427098	0.0891294	-0.0798552	0.0328012	-0.305168	-0.023527	-0.192512	-0.0798552	0.0328012	0.314442	0.258114	-0.136183	-0.136183	-0.24884	-0.192512	-0.136183	-0.361496	-0.136183	-0.305168	-0.305168	-0.0798552	-0.474152
EMR17007_20170614_S_01A	M		R	-0.177572	0.0548336	-0.0691163	-0.162079	-0.131091	-0.0381288	0.0703273	-0.00714134	-0.0536225	-0.0536225	-0.100104	-0.0381288	-0.146585	-0.224054	-0.301522	-0.100104	-0.0536225	0.101315	-0.00714134	-0.131091	-0.0226351	-0.0691163	-0.0536225	-0.131091	-0.100104	0.0238461	-0.115597	-0.0226351	0.16329	0.0548336	0.085821	-0.0691163	-0.100104	-0.115597	0.00835239	0.147796	-0.0691163	-0.0691163	-0.0536225	-0.100104
EMR17007_20170614_S_01B	M		L	0.00546557	0.0698569	0.00546557	-0.0589258	-0.123317	0.00546557	0.391814	-0.0589258	-0.0589258	-0.0589258	0.00546557	0.00546557	-0.123317	-0.123317	-0.123317	-0.123317	-0.0589258	-0.123317	-0.123317	-0.0589258	-0.123317	0.00546557	0.134248	0.263031	-0.0589258	0.134248	-0.0589258	0.19864	-0.0589258	-0.0589258	0.19864	0.0698569	0.0698569	-0.0589258	-0.0589258	0.00546557	0.00546557	-0.0589258	-0.123317	-0.123317
EMR17007_20170614_S_03A	M	X	L	-0.121189	0.00458208	-0.246959	-0.105467	-0.309845	-0.0425819	-0.215517	-0.184074	-0.278402	-0.231238	-0.199795	-0.357009	-0.37273	-0.294123	-0.309845	-0.13691	-0.246959	-0.246959	-0.231238	-0.404173	-0.294123	-0.278402	-0.184074	-0.231238	-0.0583033	-0.184074	-0.0425819	0.0989101	0.00458208	0.0203034	-0.152631	-0.105467	-0.0111393	-0.309845	-0.357009	-0.215517	-0.152631	-0.199795	-0.246959	-0.231238
EMR17007_20170614_S_03B	M	X	L	-0.133246	0.137026	-0.0916656	0.0538654	0.220186	0.0122851	0.240977	0.324137	0.116236	0.0538654	-0.0292952	-0.0292952	-0.0500853	-0.0708755	-0.112456	-0.154036	-0.112456	-0.0500853	-0.216406	-0.216406	-0.403518	-0.174826	-0.237197	-0.154036	-0.154036	-0.174826	-0.174826	-0.0500853	-0.237197	-0.0500853	0.116236	0.178606	0.157816	0.0330752	-0.0500853	0.0330752	0.0954456	0.282557	0.0330752	0.0330752
EMR17007_20170614_S_05A	M		L	-0.153379	-0.210617	-0.210617	-0.0389032	-0.0389032	-0.0961411	-0.0961411	-0.153379	0.0183348	-0.153379	-0.0389032	0.0183348	-0.0961411	-0.0961411	-0.210617	0.0755727	0.0183348	-0.153379	-0.0389032	0.0183348	-0.153379	-0.153379	-0.153379	-0.0389032	0.0183348	-0.0961411	0.0183348	0.0183348	0.132811	-0.0961411	0.361762	0.0183348	0.0183348	0.132811	0.190049	0.132811	0.0755727	0.0183348	0.0755727	0.304524
EMR17007_20170614_S_07A	M	X	R	0.868192	1.03986	1.03986	1.30961	0.880454	1.01533	0.721052	0.475818	0.524865	0.157014	-0.125005	-0.16179	-0.16179	-0.0269113	-0.100482	0.0589205	-0.100482	-0.00238795	0.0834439	-0.0514347	0.218323	0.0466588	0.0711822	0.291893	0.279631	0.647482	0.549388	0.745575	0.770099	0.70879	0.647482	1.02759	0.843669	0.56165	0.524865	0.291893	0.41451	0.279631	0.0466588	0.0466588
EMR17007_20170614_S_09A	M	X	R	-0.0175058	-0.0721622	-0.0994905	-0.208803	-0.0721622	-0.044834	0.00982246	0.119135	-0.126819	-0.126819	-0.290788	-0.26346	-0.181475	-0.154147	-0.126819	-0.0721622	0.00982246	-0.0175058	-0.126819	-0.0175058	0.119135	0.20112	0.310433	0.0918071	-0.0721622	0.20112	0.0644789	0.146464	-0.126819	0.20112	0.0918071	-0.0994905	0.255777	0.0371507	0.119135	-0.044834	0.0644789	0.00982246	0.00982246	-0.0994905
EMR17007_20170614_S_09B	M		R	-0.100413	-0.129558	-0.158704	-0.129558	-0.231567	-0.202422	-0.144131	-0.0858399	-0.144131	-0.114985	-0.173276	-0.0421217	-0.129558	-0.114985	-0.0712671	-0.202422	-0.144131	-0.114985	-0.173276	-0.187849	-0.158704	-0.202422	-0.100413	-0.202422	-0.129558	-0.0566944	-0.0566944	-0.173276	-0.0129762	-0.100413	-0.144131	-0.0566944	-0.144131	-0.187849	-0.100413	-0.027549	-0.187849	-0.173276	-0.0129762	0.161896
EMR17007_20170614_S_11A	M	X	R	0.0422729	-0.084952	0.245833	0.0677179	0.194943	0.194943	0.220388	0.144053	0.169498	-0.084952	-0.186732	-0.237622	-0.186732	-0.110397	-0.110397	0.0677179	0.500283	0.194943	0.220388	0.0931629	0.296723	0.118608	0.194943	0.423948	0.144053	0.0931629	0.0931629	0.0168279	0.220388	0.322168	0.0422729	0.398503	0.423948	0.144053	0.322168	0.271278	-0.135842	-0.186732	-0.161287	0.0422729
EMR17007_20170614_S_11B	M		L	-0.145953	0.166994	-0.145953	0.0418151	-0.0207742	-0.0833635	-0.0833635	-0.0833635	-0.145953	-0.0207742	-0.145953	-0.145953	-0.145953	-0.0833635	-0.145953	-0.0833635	-0.0207742	-0.0833635	-0.0833635	-0.0833635	-0.0833635	-0.145953	-0.0207742	-0.145953	-0.0207742	0.0418151	-0.0207742	-0.0833635	-0.0833635	-0.145953	-0.145953	-0.0207742	-0.145953	-0.0207742	-0.145953	-0.0833635	0.0418151	-0.0207742	-0.0833635	-0.145953
EMR17007_20170614_S_17A	M	X	L	0.170773	0.203862	0.137684	0.0715059	0.00532809	-0.0939387	0.0715059	0.038417	0.038417	-0.259383	-0.193205	-0.193205	-0.127028	-0.127028	-0.193205	-0.127028	-0.226294	-0.127028	-0.127028	-0.127028	0.0715059	-0.0608497	-0.127028	0.170773	0.00532809	0.038417	0.104595	0.137684	0.00532809	0.038417	0.038417	0.038417	0.00532809	0.0715059	0.104595	0.170773	-0.127028	-0.226294	-0.0277608	-0.193205
EMR17007_20170614_S_17B	M		R	0.220594	0.0840721	0.0567676	-0.0524503	-0.0524503	-0.134364	-0.107059	-0.161668	-0.216277	-0.243582	-0.243582	-0.134364	-0.188973	-0.216277	-0.161668	-0.0797548	-0.216277	-0.0251458	-0.0797548	-0.188973	-0.216277	-0.0797548	0.0294631	-0.161668	0.0294631	-0.0251458	0.0840721	0.0840721	-0.134364	-0.161668	-0.216277	-0.0524503	-0.0524503	-0.0524503	0.0840721	0.138681	0.0567676	-0.0251458	-0.0797548	0.0294631
EMR17007_20170614_S_23A	M	X	R	-0.0146818	-0.0146818	-0.0413495	-0.0680172	-0.0235711	0.0653212	0.109767	-0.0324603	0.171992	-0.0413495	-0.165799	-0.0502387	0.109767	0.367555	0.554229	0.65201	0.643121	0.812016	0.723124	0.838684	0.732013	0.723124	0.669789	0.447558	0.509783	0.349776	0.31422	0.163103	0.0742104	0.0830997	0.0919889	0.0475428	0.109767	-0.0502387	-0.0235711	-0.0769064	-0.0324603	-0.174688	-0.112463	-0.165799
EMR17007_20170614_S_23B	M	X	R	-0.0939574	-0.0828201	-0.171918	-0.127369	-0.261017	-0.194193	-0.249879	-0.227605	-0.138507	-0.127369	-0.171918	-0.0828201	-0.138507	0.0508274	0.0508274	0.117651	0.229024	0.373809	0.151063	0.284711	0.32926	-0.0271336	0.073102	-0.0382709	-0.105095	0.0396901	-0.0716828	-0.105095	0.0508274	0.00627826	-0.0828201	-0.0605455	-0.0382709	-0.0716828	-0.0159963	-0.149644	-0.160781	-0.138507	0.073102	-0.116232
EMR17007_20170614_S_27A	M	X	R	0.393852	0.417593	0.619391	0.928024	1.03486	0.83306	0.928024	0.773707	0.429463	0.00212518	-0.223414	-0.318378	-0.282767	-0.187803	-0.104709	0.203924	0.322629	0.821189	0.619391	0.655002	0.785578	0.453204	0.298888	0.263276	0.10896	0.0139957	0.203924	0.334499	0.35824	0.453204	0.441334	0.34637	0.512557	0.500686	0.59565	0.322629	0.203924	0.0377367	0.00212518	0.0733482
EMR17007_20170614_S_27B	M		R	-0.0886243	-0.00561397	-0.171635	-0.0886243	-0.0471191	-0.130129	-0.21314	-0.0886243	-0.0886243	-0.171635	-0.171635	-0.21314	-0.130129	-0.0471191	-0.130129	-0.00561397	-0.0471191	-0.130129	-0.0471191	-0.130129	-0.171635	-0.0886243	-0.21314	-0.130129	-0.171635	-0.0886243	-0.00561397	0.0358912	-0.00561397	0.0773964	0.160407	0.0773964	0.0358912	0.0773964	0.0773964	0.409438	-0.0471191	0.243417	-0.130129	0.0773964
EMR17008_20170629_S_01A	M	X	R	0.165068	0.412897	0.298514	0.508216	0.184131	0.12694	-0.0827616	-0.101825	0.0506849	-0.159017	-0.559356	-0.159017	0.0506849	-0.120889	0.165068	-0.0827616	0.317578	0.43196	0.508216	0.527279	0.584471	0.393833	0.336642	0.336642	0.0888124	0.0888124	-0.00650648	-0.101825	0.203195	0.0697486	-0.0255703	-0.0255703	-0.159017	-0.00650648	-0.044634	0.0697486	-0.101825	-0.292463	-0.0255703	0.0697486
EMR17008_20170629_S_01B	M	X	L	-0.180862	-0.151557	0.0242753	-0.0636408	0.112191	0.581077	0.786214	0.991352	1.75329	1.48954	1.66538	0.962047	0.698298	0.463856	0.082886	0.112191	-0.0343354	-0.122251	-0.151557	-0.00503005	-0.268778	-0.0343354	-0.0636408	-0.210168	-0.122251	-0.210168	-0.0636408	0.170802	0.0535807	0.229413	0.522466	0.463856	0.698298	0.727604	0.581077	0.522466	0.903436	0.727604	0.43455	0.522466
EMR17008_20170629_S_01C	M	X	L	0.222907	0.351081	0.0690976	0.351081	0.299812	0.0947325	0.197272	0.222907	0.299812	-0.135982	-0.238521	-0.289791	-0.315426	-0.289791	-0.264156	-0.135982	0.222907	0.146002	0.0434627	0.222907	-0.00780709	-0.161616	-0.033442	-0.0590769	0.120367	-0.238521	-0.135982	-0.238521	-0.161616	-0.289791	-0.315426	-0.110347	-0.341061	-0.238521	-0.110347	-0.289791	-0.161616	-0.264156	-0.161616	-0.238521
EMR17008_20170629_S_01D	M	X	L	-0.0273756	-0.301996	0.0550105	0.0550105	-0.247072	-0.0548377	-0.0822997	0.137397	0.0275485	-0.137224	-0.274534	-0.0548377	-0.137224	0.192321	-0.21961	0.247245	-0.137224	0.0275485	-0.274534	-0.21961	-0.109762	-0.137224	-0.301996	-0.0273756	-0.274534	-0.164686	-0.21961	-0.439306	-0.164686	-0.164686	-0.301996	-0.247072	-0.164686	-0.329458	-0.137224	-0.0548377	8.64197e-05	0.0275485	0.109935	-0.274534
EMR17008_20170629_S_03A	M		L	0.354708	0.261115	0.207633	0.274485	0.127411	0.341337	0.0872995	0.4483	0.461671	0.501782	-0.0865157	0.00707714	-0.0865157	-0.00629326	-0.313812	0.0872995	-0.0330341	-0.0998861	-0.113256	0.0204475	0.221004	-0.113256	-0.113256	-0.273701	-0.139997	-0.0464045	-0.126627	-0.166738	0.10067	0.0204475	-0.0731453	-0.193479	-0.126627	0.194263	-0.139997	-0.153368	-0.24696	-0.193479	-0.166738	-0.0731453
EMR17008_20170629_S_05A	M	X	L	-0.195897	-0.220803	-0.494771	-0.345334	-0.195897	-0.295522	-0.220803	-0.320428	0.0282581	-0.0215542	0.576193	0.327132	0.202601	0.426756	0.177695	-0.121179	-0.195897	-0.0962726	-0.295522	-0.320428	-0.195897	-0.320428	-0.220803	0.102976	0.0531642	0.0282581	-0.121179	-0.220803	-0.0215542	0.0282581	-0.295522	-0.170991	-0.121179	-0.121179	-0.0713665	-0.146085	0.0282581	0.102976	0.00335194	0.102976
EMR17008_20170629_S_09A	M	X	L	0.350271	0.350271	0.238892	0.0996687	0.155358	-0.0395548	-0.123089	0.183203	-0.150934	-0.290157	0.0996687	-0.262312	0.0439793	-0.178778	0.155358	-0.123089	-0.0117101	0.0439793	0.127513	0.0996687	0.378116	0.46165	0.46165	0.489494	0.350271	0.378116	0.489494	0.127513	0.266737	0.238892	0.155358	0.266737	-0.0952442	0.155358	0.238892	-0.206623	-0.0673995	0.071824	-0.206623	-0.234468
EMR17008_20170629_S_11A	M	X	L	0.108069	0.0644671	-0.000936187	0.0862682	0.0208649	-0.0881406	-0.197146	-0.153544	-0.197146	-0.175345	-0.0663395	0.12987	0.260677	0.195274	0.282478	0.12987	0.260677	-0.0227373	-0.0881406	-0.109942	-0.0881406	-0.131743	0.0208649	0.108069	0.260677	0.260677	0.282478	0.238876	0.12987	0.195274	0.12987	0.12987	-0.0881406	0.0208649	-0.109942	-0.131743	-0.131743	-0.197146	-0.131743	-0.153544
EMR17008_20170629_S_11B	M	X	R	0.399698	0.317235	0.0286153	-0.0126161	-0.260005	-0.177542	-0.13631	-0.0538476	0.0698467	-0.0538476	0.15231	0.0286153	-0.095079	0.0286153	0.358467	0.440929	0.482161	0.647086	0.358467	0.605855	0.605855	1.0594	1.14186	0.770781	0.440929	0.440929	0.399698	0.0286153	0.193541	0.358467	0.15231	-0.13631	-0.13631	-0.095079	-0.0126161	-0.0538476	-0.095079	0.0698467	-0.095079	-0.13631
EMR17008_20170629_S_11C	M	X	R	0.42992	0.254153	-0.0270738	-0.167687	-0.0973806	-0.202841	-0.308301	-0.132534	-0.132534	-0.0622272	0.465074	0.851761	0.500227	0.500227	0.851761	0.535381	0.605687	0.500227	0.148693	0.254153	0.289307	0.254153	0.32446	0.183847	0.0783864	0.043233	0.148693	-0.132534	-0.0973806	0.183847	-0.0973806	-0.132534	-0.167687	-0.0622272	-0.0973806	-0.0622272	-0.0622272	-0.202841	-0.0973806	-0.202841
EMR17008_20170629_S_17A	M	X	R	0.208617	0.44699	0.273628	0.316969	0.316969	0.42532	0.078596	-0.203117	-0.333139	-0.224787	-0.701533	-0.549841	-0.614852	-0.723203	-0.614852	-0.333139	-0.0730957	0.143607	0.078596	-0.0297552	-0.159777	-0.138106	0.078596	-0.0947659	-0.0514254	-0.116436	-0.0297552	0.100266	-0.116436	-0.0730957	0.0135853	-0.116436	-0.203117	-0.138106	-0.00808496	-0.159777	-0.116436	-0.0730957	-0.311468	-0.224787
EMR17008_20170629_S_17B	M		L	0.139615	0.165334	0.242494	0.165334	0.0367354	0.165334	0.0624552	-0.0661438	0.088175	-0.194743	-0.143303	0.0367354	-0.246182	-0.169023	-0.194743	-0.040424	-0.040424	-0.169023	-0.194743	0.216774	-0.0147042	0.165334	0.139615	0.0110156	0.0367354	0.0624552	-0.169023	-0.0661438	0.0110156	-0.220463	-0.117583	-0.0918636	-0.040424	-0.169023	0.0110156	0.0110156	-0.117583	-0.0661438	0.216774	-0.117583
EMR17008_20170629_S_17C	M	X	R	0.27785	0.0142549	0.0845469	0.400861	0.436007	0.383288	0.312996	0.62931	0.787467	0.471153	0.0318279	-0.0911831	-0.143902	-0.24934	-0.319632	-0.372351	-0.24934	-0.284486	-0.319632	-0.266913	-0.108756	-0.24934	-0.319632	-0.231767	-0.24934	-0.0560371	-0.407497	-0.372351	-0.442643	-0.266913	-0.143902	-0.284486	-0.196621	-0.0736101	-0.284486	-0.00331812	0.10212	-0.143902	-0.0384641	0.0318279
EMR17008_20170629_S_19A	M	X	R	0.140376	-0.139383	-0.0927567	-0.18601	-0.279263	-0.349203	-0.209323	-0.325889	-0.209323	0.140376	0.187002	0.396822	0.513388	0.863087	0.74652	0.676581	0.513388	0.373508	0.117063	0.420135	0.350195	0.653267	0.793147	0.74652	0.81646	0.583328	0.979653	0.769834	0.81646	0.466761	0.350195	0.210316	0.280255	0.256942	0.350195	0.210316	0.303569	0.350195	0.629954	0.350195
EMR17008_20170629_S_19B	M	X	L	0.784633	0.482067	0.232895	0.410875	0.143905	-0.212054	-0.354438	-0.407832	-0.318842	-0.33664	-0.532418	-0.443428	-0.229852	0.250693	0.197299	0.286289	-0.0162764	-0.265448	-0.140862	-0.0874683	0.268491	0.410875	0.660047	0.642249	1.105	0.891421	0.677845	0.838027	0.820229	0.873623	0.588855	0.553259	0.660047	0.482067	0.286289	0.464269	0.232895	0.410875	0.428673	0.304087
EMR17008_20170629_S_19C	M		L	0.139498	0.104771	0.417313	-0.155681	-0.45086	-0.190408	-0.155681	-0.155681	-0.225135	-0.381406	-0.138318	-0.259862	-0.225135	-0.138318	0.139498	0.0874073	-0.0341369	-0.120954	0.0526804	0.0179535	-0.207771	0.0700438	0.191588	0.0700438	0.295769	0.0700438	0.261042	0.104771	0.0353169	0.330496	0.174225	0.0874073	0.139498	-0.0341369	-0.259862	0.0526804	-0.103591	-0.155681	-0.346679	0.0526804
EMR17008_20170629_S_21A	M	X	R	-0.144694	0.1074	-0.0726673	0.143413	0.011364	-0.0846718	-0.13269	-0.288748	-0.34877	-0.588859	-0.828949	-0.720909	-0.684895	-0.900976	-0.840953	-0.612868	-0.384783	-0.13269	-0.264739	-0.288748	-0.324761	-0.384783	-0.0966762	-0.276743	-0.216721	-0.372779	-0.264739	-0.120685	-0.0966762	-0.228725	-0.180708	-0.0726673	-0.0606628	-0.0366539	-0.0606628	0.0233685	-0.0366539	-0.13269	-0.180708	-0.156699
EMR17008_20170629_S_21B	M	X	L	0.187315	0.140629	-0.0927995	0.000572057	-0.2562	-0.2562	-0.326228	-0.326228	-0.0461137	-0.116142	0.0939436	0.327373	0.420744	0.327373	0.607487	0.350715	0.280687	0.0706007	-0.0227708	0.163972	0.257344	0.187315	0.257344	0.0239149	0.350715	-0.0461137	0.163972	0.0239149	0.280687	-0.0227708	-0.209514	-0.139485	-0.0227708	-0.162828	-0.116142	-0.0461137	0.0472578	0.0939436	0.0939436	-0.0461137
EMR17008_20170629_S_21C	M	X	R	0.422858	0.212795	0.29682	0.170782	0.128769	0.317827	0.401852	0.548897	0.948018	1.38915	1.66223	1.57821	1.24211	1.26311	1.24211	1.17909	1.62022	1.13707	0.969024	1.15808	0.99003	1.20009	0.884999	0.611916	0.674935	0.52789	0.443865	0.422858	0.254807	0.317827	0.0657501	0.275814	0.191788	0.191788	0.0447437	0.149776	0.254807	-0.0812945	0.107763	0.170782
EMR17008_20170629_S_21D	M	X	R	-0.284705	-0.218945	-0.317585	-0.416224	-0.547744	-0.481984	-0.514864	-0.514864	-0.514864	-0.514864	-0.514864	-0.449104	-0.481984	-0.383344	-0.186065	-0.0874254	0.208493	0.537292	0.635932	0.734572	0.405773	0.109854	0.142734	0.076974	0.0112142	-0.153185	-0.350464	-0.153185	-0.317585	-0.120305	-0.317585	-0.449104	-0.383344	-0.251825	-0.449104	-0.416224	-0.383344	-0.153185	-0.284705	-0.120305
EMR17008_20170629_S_23A	M	X	L	0.0582988	-0.000764533	-0.0598278	-0.000764533	-0.158267	-0.296081	-0.0598278	0.038611	-0.197642	-0.21733	-0.414208	-0.256705	-0.355144	-0.414208	-0.433895	-0.512646	-0.492959	-0.492959	-0.630773	-0.512646	-0.57171	-0.473271	-0.532334	-0.552022	-0.453583	-0.512646	-0.39452	-0.335457	-0.296081	-0.414208	-0.118891	-0.158267	-0.158267	-0.0401401	-0.0992034	-0.0204523	-0.138579	-0.0204523	0.117362	0.117362
EMR17008_20170629_S_23B	M	X	L	-0.14641	-0.186058	-0.278569	-0.278569	-0.476806	-0.516453	-0.371079	-0.371079	-0.252137	-0.305	0.0914743	-0.0671155	0.355791	0.461517	0.58046	0.342575	0.289712	0.170769	0.157553	-0.172842	-0.21249	-0.344648	-0.21249	-0.199274	-0.0274681	0.0914743	0.250064	0.10469	0.0782585	-0.0406839	0.223632	0.0518268	0.0914743	0.276496	0.289712	0.250064	-0.00103644	-0.0538997	-0.00103644	-0.0671155
EMR17008_20170629_S_23C	M	X	L	0.94878	0.871342	1.3876	1.36178	1.41341	1.15528	1.10366	0.80681	0.367992	-0.070826	-0.496737	-0.599989	-0.677427	-0.535457	-0.587082	-0.561269	-0.638708	-0.651614	-0.70324	-0.871023	-0.677427	-0.690333	-0.754865	-0.625801	-0.535457	-0.34186	-0.148264	0.0969573	0.0840509	0.0582381	0.213115	0.213115	0.213115	0.148583	0.0840509	-0.0837324	-0.148264	-0.290235	-0.303141	-0.483831
EMR17008_20170629_S_23D	M	X	L	-0.252207	-0.146929	-0.252207	-0.182022	-0.357486	-0.357486	-0.357486	-0.462764	-0.392578	-0.217115	-0.392578	-0.2873	-0.252207	-0.041651	-0.322393	-0.2873	-0.252207	-0.427671	-0.322393	-0.322393	-0.392578	-0.322393	-0.427671	-0.357486	-0.427671	-0.357486	-0.217115	-0.392578	-0.322393	-0.357486	-0.392578	-0.322393	-0.392578	-0.392578	-0.357486	-0.392578	-0.322393	-0.357486	-0.392578	-0.427671
EMR17008_20170629_S_23E	M	X	L	1.39903	2.0879	1.82295	1.79645	2.16738	1.63748	1.5315	1.16057	0.948612	0.339228	-0.137682	-0.164177	-0.217167	-0.349642	-0.190672	-0.190672	-0.00520713	-0.0317021	-0.137682	-0.0317021	-0.0317021	-0.164177	-0.0846921	-0.137682	0.100773	0.100773	0.445208	0.312733	0.312733	0.577683	0.418713	0.365723	0.471703	0.498198	0.312733	0.153763	0.233248	-0.111187	-0.0317021	0.0212878
EMR17008_20170629_S_25A	M	X	R	0.0505408	-0.17141	-0.220733	-0.196071	-0.220733	0.0998632	0.223169	0.519104	0.987667	0.913684	2.44268	1.82615	1.40691	0.8397	0.272492	0.00121834	-0.0727653	0.00121834	-0.146749	-0.122088	-0.0234429	-0.0727653	-0.196071	-0.17141	-0.0727653	-0.17141	-0.220733	-0.146749	-0.0481041	-0.146749	-0.196071	-0.146749	0.0505408	-0.196071	-0.220733	-0.0727653	-0.17141	-0.220733	-0.196071	-0.196071
EMR17008_20170629_S_25B	M		R	0.344846	0.511624	0.539421	0.900774	0.900774	0.567217	0.428235	0.23366	0.31705	-0.0998966	-0.0443038	0.0668819	-0.127693	-0.0165074	0.400439	0.539421	0.31705	-0.0443038	0.0946783	-0.127693	0.0390854	-0.0998966	0.122475	0.0668819	-0.0721002	-0.0443038	0.0668819	0.0390854	-0.127693	-0.155489	-0.127693	-0.155489	-0.155489	-0.183286	-0.127693	-0.0998966	-0.155489	-0.155489	-0.294472	-0.211082
EMR17008_20170629_S_27A	M		L	0.0164935	-0.118438	-0.0644651	-0.334327	-0.17241	-0.226382	-0.17241	-0.0914514	0.0704659	0.0434797	-0.0914514	-0.226382	-0.17241	-0.334327	-0.226382	-0.280355	-0.280355	-0.280355	-0.118438	-0.199396	0.0704659	-0.226382	0.0704659	0.205397	-0.118438	0.0974521	-0.280355	-0.17241	-0.0644651	-0.0104927	0.0164935	0.151425	-0.0374789	-0.0644651	-0.226382	0.0164935	-0.0644651	-0.0644651	-0.334327	-0.118438
EMR17008_20170629_S_27B	M	X	R	0.237215	-0.0740426	-0.0221663	0.0297099	-0.0221663	0.0815862	0.0815862	-0.0740426	-0.125919	-0.125919	-0.0740426	-0.177795	-0.0740426	-0.177795	-0.125919	-0.125919	-0.0221663	-0.0740426	0.185339	0.133462	0.0297099	0.237215	0.237215	0.548473	0.185339	-0.0221663	0.237215	0.133462	0.0815862	0.0815862	0.0297099	-0.0740426	0.0815862	0.133462	0.340968	0.185339	0.340968	0.340968	-0.0221663	-0.0221663
EMR17008_20170629_S_29A	M	X	R	0.187835	0.0438483	0.0150509	0.0726456	0.0438483	0.504606	0.274227	0.159038	0.418214	0.504606	0.159038	-0.215328	0.0726456	-0.0137465	0.0150509	0.0150509	0.216633	0.101443	0.13024	0.0726456	0.0150509	0.0438483	-0.0425439	0.0726456	0.0150509	-0.100139	0.0726456	0.101443	0.101443	0.0150509	-0.100139	0.0726456	0.159038	-0.186531	-0.215328	0.0726456	-0.0137465	0.0438483	-0.0137465	-0.186531
EMR17008_20170629_S_29B	M	X	R	-0.0854083	0.0941935	0.183994	0.00439257	0.0941935	0.00439257	0.0941935	0.0941935	-0.0854083	-0.175209	-0.0854083	0.183994	0.543198	0.812601	1.53101	0.992202	0.7228	0.453397	0.992202	0.453397	0.812601	0.453397	0.453397	0.453397	0.453397	0.363596	0.00439257	0.453397	0.183994	0.183994	0.0941935	-0.0854083	0.0941935	0.00439257	0.0941935	0.273795	0.00439257	0.363596	0.273795	0.0941935

## Sheet: Propranolol Cue Left
ID	sex	SidePref	CUE	ZSCORE -1	-0.9	-0.8	-0.7	-0.6	-0.5	-0.4	-0.3	-0.2	-0.1	-1.38778e-16	0.1	0.2	0.3	0.4	0.5	0.6	0.7	0.8	0.9	1	1.1	1.2	1.3	1.4	1.5	1.6	1.7	1.8	1.9	2	2.1	2.2	2.3	2.4	2.5	2.6	2.7	2.8	2.9
CDH16002_20161103_PA10_01A	F		R	0.157263	0.114522	0.242746	0.0290391	0.0717806	-0.184668	0.242746	-0.0991852	0.157263	0.285488	-0.0137023	0.242746	0.114522	-0.0137023	0.285488	0.370971	0.157263	0.413712	-0.184668	0.0290391	0.285488	0.456454	-0.141927	-0.312892	0.200005	0.200005	-0.0564438	-0.0137023	0.157263	0.200005	0.499195	-0.0564438	-0.22741	-0.312892	0.0717806	0.200005	-0.0137023	-0.0564438	0.114522	0.114522
CDH16002_20161103_PA10_17A	F		R	-0.136194	-0.136194	-0.136194	-0.25245	-0.019938	0.0963178	-0.136194	-0.136194	-0.019938	-0.25245	-0.136194	-0.25245	-0.136194	0.212574	-0.136194	-0.136194	-0.136194	-0.019938	-0.136194	-0.25245	-0.136194	-0.136194	-0.019938	-0.019938	0.212574	-0.25245	-0.019938	-0.136194	-0.25245	-0.136194	-0.136194	-0.019938	0.212574	-0.136194	-0.019938	-0.136194	0.445085	0.212574	-0.136194	0.212574
CDH16002_20161103_PA10_19A	F			-0.169283	-0.169283	-0.169283	-0.169283	-0.169283	-0.169283	-0.169283	-0.169283	-0.169283	-0.169283	-0.169283	-0.169283	-0.169283	-0.169283	-0.169283	-0.169283	-0.169283	-0.169283	-0.169283	-0.0353672	-0.169283	-0.169283	0.0985482	-0.169283	-0.0353672	0.232464	0.232464	0.0985482	0.500294	0.0985482	0.232464	0.0985482	0.500294	0.500294	0.232464	0.366379	-0.0353672	0.232464	0.232464	-0.0353672
CDH16002_20161103_PA10_19B	F	X	R	-0.565902	-0.381926	-0.492311	-0.418721	-0.529107	-0.418721	-0.197949	-0.455516	-0.565902	-0.381926	-0.639492	-0.381926	-0.492311	-0.381926	-0.418721	-0.418721	-0.234745	-0.308335	-0.27154	-0.602697	-0.308335	-0.565902	-0.161154	-0.197949	-0.529107	-0.492311	-0.234745	-0.161154	-0.381926	-0.234745	-0.234745	-0.455516	-0.308335	-0.455516	-0.492311	-0.308335	-0.492311	-0.492311	-0.602697	-0.455516
CDH16002_20161103_PA10_19C	F		L	-0.0471359	0.116982	0.308453	0.199041	0.335806	0.527276	0.171688	0.144335	-0.0197829	0.226394	0.062276	0.00757007	0.00757007	-0.0744888	0.335806	0.00757007	0.527276	0.062276	0.363159	0.581982	0.2811	-0.0471359	-0.0744888	0.089629	0.445217	0.199041	0.226394	0.390512	0.47257	0.034923	0.335806	0.00757007	-0.101842	0.062276	0.417864	0.034923	-0.293313	-0.293313	0.089629	0.116982
CDH16003_20161102_PA10_01A	F	X	L	-0.423399	-0.622663	-0.556242	-0.456609	-0.323766	-0.456609	-0.523031	-0.290555	-0.257345	-0.257345	-0.257345	-0.0580799	-0.257345	-0.157712	-0.0248691	-0.390188	-0.356977	-0.323766	0.00834171	-0.124501	0.141185	0.141185	0.00834171	0.0415525	0.307239	0.174396	-0.323766	-0.0580799	-0.356977	-0.190923	-0.157712	-0.290555	-0.0248691	-0.257345	-0.157712	-0.290555	-0.224134	-0.356977	-0.323766	-0.124501
CDH16003_20161102_PA10_25A	F	X	L	0.0835132	0.292473	-0.264753	0.153166	-0.125446	0.0835132	-0.264753	-0.334406	-0.264753	-0.195099	-0.195099	-0.125446	-0.0557931	0.501432	-0.0557931	0.0835132	0.362126	0.153166	-0.195099	0.0835132	-0.0557931	0.0138601	0.22282	0.0138601	0.0835132	-0.195099	0.292473	0.0138601	0.0138601	0.431779	0.431779	0.0138601	-0.0557931	-0.0557931	0.22282	-0.195099	-0.0557931	0.22282	0.0138601	-0.125446
CDH16005_20161107_PA10_05A	M	X	L	-0.0361897	0.0488577	0.0772069	0.0772069	0.0488577	-0.00784056	0.162254	0.389047	-0.092888	0.757586	0.360698	0.615841	0.445746	0.530793	0.984379	0.417397	0.615841	0.389047	0.757586	0.389047	0.218953	0.105556	0.247302	0.304	0.275651	0.417397	0.275651	0.105556	0.133905	0.0488577	0.360698	0.0205086	0.275651	0.133905	-0.0645388	0.105556	-0.177935	0.389047	0.64419	0.133905
CDH16005_20161107_PA10_07A	M	X	L	-0.295903	-0.0876418	0.0945868	0.0425215	0.589207	0.120619	0.589207	0.276815	0.667305	0.433011	0.120619	0.433011	-0.00954381	0.0425215	0.172685	-0.00954381	-0.00954381	-0.321936	-0.0876418	-0.191772	-0.347968	-0.26987	-0.582262	-0.374001	-0.321936	-0.295903	-0.400034	-0.16574	0.0425215	-0.0616091	0.0685542	0.172685	0.380946	0.250783	0.276815	0.302848	0.0945868	-0.0876418	0.406979	0.250783
CDH16005_20161107_PA10_09A	M		L	0.090946	-0.0117464	0.090946	0.450369	0.193638	0.193638	0.142292	0.399023	0.296331	0.501715	0.347677	0.090946	0.244984	-0.0117464	-0.0117464	-0.165785	-0.0117464	-0.0630926	0.142292	0.244984	0.0395998	-0.165785	0.0395998	0.296331	0.604408	-0.0117464	0.0395998	0.090946	-0.114439	0.142292	-0.0630926	-0.0117464	-0.0630926	-0.217131	-0.0117464	0.193638	0.0395998	0.0395998	-0.0117464	-0.0117464
CDH16005_20161107_PA10_09B	M		L	-0.0230412	0.379922	0.228811	-0.0230412	0.17844	0.17844	0.17844	0.12807	-0.224523	0.430292	0.12807	0.0776996	-0.0230412	-0.0230412	0.0273292	0.17844	0.12807	-0.0734116	0.228811	-0.0230412	0.0273292	-0.0734116	0.379922	0.17844	0.279181	0.12807	-0.224523	-0.224523	-0.174152	-0.0230412	0.228811	-0.0230412	-0.123782	-0.0734116	-0.0734116	-0.123782	-0.0734116	0.279181	-0.274893	0.228811
CDH16005_20161107_PA10_13A	M	X	R	0.374236	-0.258556	0.0392282	-0.333002	0.411459	0.18812	-0.109664	-0.072441	0.374236	0.150897	0.150897	-0.072441	0.113674	-0.0352179	-0.146887	0.0392282	-0.146887	-0.481895	-0.0352179	0.00200517	-0.0352179	-0.109664	0.0392282	-0.295779	-0.072441	-0.109664	-0.258556	-0.18411	-0.0352179	-0.0352179	-0.18411	-0.295779	0.00200517	-0.109664	0.0392282	0.18812	0.18812	0.225344	-0.072441	0.0764513
CDH16005_20161107_PA10_15A	M		R	0.320087	0.168351	-0.0592519	0.130417	-0.13512	-0.210987	-0.362723	-0.286855	-0.173053	-0.400657	-0.248921	-0.324789	-0.400657	0.0545497	-0.13512	-0.210987	0.168351	-0.210987	0.206285	-0.021318	-0.13512	0.0545497	0.282153	-0.0592519	0.320087	0.206285	-0.13512	0.0545497	-0.021318	0.168351	-0.0971857	0.130417	-0.13512	-0.173053	-0.286855	-0.210987	-0.0971857	-0.324789	-0.021318	-0.0592519
CDH16005_20161107_PA10_21A	M	X	L	-0.251708	-0.192355	-0.370414	-0.281385	-0.518797	-0.370414	-0.281385	-0.429767	-0.251708	-0.222032	-0.0736494	-0.311061	-0.0142964	-0.0142964	-0.192355	-0.0439729	-0.311061	-0.340738	0.10441	-0.222032	-0.133002	-0.48912	-0.0142964	-0.162679	-0.162679	-0.162679	-0.429767	-0.192355	-0.281385	-0.311061	-0.162679	-0.0439729	-0.222032	-0.222032	-0.251708	0.0747331	-0.0142964	0.252792	0.163763	0.134086
CDH16005_20161107_PA10_21B	M		R	-0.129255	-0.0766087	0.133977	-0.0766087	-0.234548	-0.0239622	-0.287195	-0.234548	0.0286843	-0.181902	-0.445134	-0.181902	-0.181902	-0.129255	-0.129255	-0.129255	0.0286843	0.0286843	0.0813308	0.186624	-0.181902	0.0286843	0.133977	-0.0766087	-0.0239622	-0.234548	-0.0239622	-0.0766087	-0.0766087	-0.0239622	-0.129255	0.0813308	-0.0239622	-0.181902	0.0286843	-0.181902	-0.234548	-0.129255	-0.181902	-0.234548
CDH16005_20161107_PA10_21C	M		L	-0.068477	0.392992	0.195219	-0.134401	-0.134401	-0.200325	-0.134401	-0.200325	-0.134401	-0.200325	-0.00255294	0.0633712	-0.200325	-0.200325	-0.200325	0.0633712	0.0633712	-0.134401	-0.00255294	0.0633712	0.261143	-0.00255294	0.0633712	-0.068477	0.195219	0.458916	0.656688	0.656688	0.261143	0.261143	0.261143	0.392992	0.261143	0.195219	0.261143	-0.068477	-0.068477	0.129295	-0.068477	-0.00255294
CDH16008_20161102_PA10_19A	M	X	R	0.261851	0.587427	0.153326	0.261851	0.370376	-0.0637242	-0.00946162	-0.117987	-0.117987	-0.0637242	-0.0637242	-0.00946162	-0.117987	0.261851	0.0990635	0.316114	0.316114	0.261851	0.0990635	0.261851	-0.00946162	0.0990635	0.0990635	0.261851	0.044801	-0.00946162	-0.0637242	0.153326	0.044801	-0.0637242	-0.00946162	-0.172249	-0.117987	-0.172249	-0.117987	-0.226512	-0.0637242	0.0990635	-0.117987	-0.172249
CDH16010_20161104_PA10_01A	F		L	-0.0367035	0.0967063	0.0300014	0.296821	0.363526	0.363526	0.763755	0.630345	0.69705	0.56364	0.296821	0.430231	0.496936	-0.0367035	0.296821	0.430231	0.163411	-0.0367035	0.56364	0.56364	0.296821	0.430231	0.496936	0.230116	0.363526	-0.170113	0.430231	0.496936	0.230116	0.363526	0.0967063	0.0967063	-0.170113	0.163411	0.230116	0.0967063	-0.0367035	0.430231	0.0967063	0.0967063
CDH16010_20161104_PA10_01B	F	X	L	-0.194851	-0.00909587	0.315976	0.17666	-0.148412	0.223098	-0.00909587	-0.148412	0.037343	-0.101974	-0.194851	-0.24129	-0.00909587	-0.287729	-0.101974	-0.0555347	-0.194851	0.269537	0.037343	-0.148412	0.223098	0.037343	0.362415	0.0837818	-0.194851	-0.148412	0.130221	0.223098	0.455293	0.315976	0.455293	0.130221	0.455293	0.130221	0.315976	-0.287729	-0.101974	-0.0555347	-0.00909587	-0.101974
CDH16010_20161104_PA10_01C	F		R	0.18701	0.298451	0.18701	0.18701	-0.147316	-0.035874	-0.258758	-0.035874	-0.258758	-0.147316	-0.258758	-0.147316	-0.258758	-0.147316	-0.147316	-0.035874	-0.035874	-0.035874	-0.258758	-0.035874	-0.147316	-0.147316	-0.258758	-0.147316	-0.147316	-0.035874	-0.147316	-0.147316	-0.258758	-0.258758	-0.147316	-0.147316	-0.147316	-0.147316	-0.035874	-0.147316	0.0755678	-0.147316	-0.147316	0.0755678
CDH16010_20161104_PA10_05A	F		R	-0.189043	-0.359038	-0.274041	-0.316539	-0.359038	-0.316539	-0.444036	-0.316539	-0.359038	-0.401537	-0.401537	-0.486535	-0.486535	-0.401537	-0.316539	-0.529034	-0.274041	-0.444036	-0.359038	-0.401537	-0.401537	-0.316539	-0.359038	-0.231542	-0.486535	-0.401537	-0.401537	-0.316539	-0.571533	-0.274041	-0.189043	-0.401537	-0.146544	-0.189043	-0.444036	-0.401537	-0.401537	-0.274041	-0.189043	-0.444036
CDH16010_20161104_PA10_05B	F		L	-0.15975	0.418488	0.611234	-0.0955014	0.032996	-0.15975	-0.0955014	-0.223999	-0.0955014	0.0972447	0.225742	0.161493	-0.0312527	0.225742	0.225742	0.225742	0.546986	0.418488	0.35424	-0.15975	0.289991	0.032996	0.482737	-0.223999	0.161493	0.289991	0.161493	-0.15975	0.161493	0.0972447	0.482737	0.0972447	0.161493	0.0972447	-0.15975	-0.15975	-0.0312527	0.032996	-0.15975	-0.0312527
CDH16010_20161104_PA10_05C	F	X	R	0.17602	0.0792415	0.0308522	0.0308522	0.127631	0.0308522	0.0308522	-0.114316	-0.114316	-0.356263	-0.0175372	-0.356263	-0.259484	0.0308522	-0.0175372	-0.259484	-0.0175372	-0.114316	-0.259484	-0.211095	-0.211095	-0.162705	-0.211095	-0.356263	-0.453041	-0.356263	-0.114316	-0.307873	-0.114316	-0.259484	-0.259484	-0.114316	0.127631	-0.114316	-0.356263	-0.259484	-0.114316	-0.356263	-0.0659265	0.17602
CDH16010_20161104_PA10_07A	F	X	R	-0.367845	-0.0943454	0.179154	-0.0487621	-0.00317886	-0.139929	0.0424044	-0.185512	-0.231095	-0.139929	-0.367845	-0.00317886	-0.139929	-0.0487621	0.589404	0.179154	0.0424044	0.0879877	0.270321	0.179154	0.361487	-0.0487621	0.634987	0.0879877	0.270321	0.0879877	0.498237	0.40707	-0.139929	0.270321	0.589404	0.133571	0.133571	0.0879877	0.498237	0.224737	0.270321	0.179154	0.179154	-0.139929
CDH16010_20161104_PA10_07B	F	X	L	0.679894	0.543115	0.953453	0.406336	0.269556	0.543115	0.406336	0.679894	0.406336	0.201167	0.132777	0.611505	0.201167	-0.0723922	0.0643872	0.0643872	-0.140782	-0.00400248	0.201167	0.201167	0.406336	0.201167	0.337946	0.201167	-0.0723922	0.269556	0.132777	0.201167	0.0643872	-0.140782	0.474725	0.132777	-0.00400248	0.611505	0.0643872	0.201167	0.201167	0.269556	0.337946	0.474725
CDH16010_20161104_PA10_11A	F		R	-0.232785	-0.0816203	0.258501	0.182919	0.22071	0.371875	0.598623	0.485249	0.598623	0.22071	0.334084	0.107336	0.182919	0.334084	-0.232785	0.296293	-0.0816203	-0.00603769	0.0695449	0.296293	-0.043829	-0.346159	-0.043829	-0.270577	0.107336	0.0317536	-0.119412	0.334084	0.447458	0.182919	0.334084	0.182919	0.296293	0.371875	0.598623	0.598623	0.409667	0.636414	0.334084	0.258501
CDH16010_20161104_PA10_13A	F	X	R	0.104611	0.209427	0.261835	0.209427	0.366651	0.104611	0.104611	0.314243	0.523875	0.261835	-0.0526131	0.104611	-0.105021	-0.0526131	0.157019	0.314243	-0.000205126	0.261835	0.104611	-0.105021	-0.262245	0.0522029	0.314243	0.104611	0.104611	-0.0526131	0.209427	0.419059	0.261835	0.261835	0.0522029	-0.157429	0.209427	0.0522029	-0.000205126	0.157019	0.523875	0.366651	-0.105021	0.157019
CDH16010_20161104_PA10_15A	F	X	R	0.149293	0.433425	0.555196	0.474016	0.514606	0.392835	0.189884	0.149293	0.555196	-0.0130679	0.352245	0.433425	0.311654	0.474016	-0.134839	0.149293	0.392835	-0.134839	0.149293	0.392835	0.0275224	0.0275224	-0.0536582	0.352245	0.311654	0.311654	-0.0130679	0.595787	-0.0130679	0.149293	0.230474	0.433425	-0.216019	-0.134839	0.352245	0.0275224	0.433425	-0.0942485	0.474016	-0.0130679
CDH16010_20161104_PA10_15B	F	X	L	-0.175719	-0.292153	-0.408586	-0.233936	-0.233936	0.0571469	-0.233936	-0.00106968	0.231797	0.115364	0.52288	0.115364	-0.0592863	-0.117503	0.17358	0.290013	0.231797	0.290013	0.231797	0.115364	0.0571469	-0.117503	-0.00106968	-0.233936	0.0571469	0.115364	-0.0592863	0.0571469	0.115364	-0.0592863	-0.292153	-0.0592863	0.115364	-0.00106968	-0.175719	-0.117503	-0.233936	-0.00106968	0.115364	-0.0592863
CDH16010_20161104_PA10_17A	F		R	0.650757	0.10791	0.616829	0.10791	0.345405	0.243621	0.718613	0.447189	0.345405	0.345405	0.209693	0.10791	0.311477	0.141837	0.413261	0.209693	0.209693	0.379333	0.481117	0.481117	0.243621	0.447189	0.243621	0.379333	0.650757	0.786469	0.481117	0.00612556	0.447189	0.515045	0.481117	0.650757	0.10791	0.379333	0.0400535	0.345405	0.481117	0.345405	0.379333	0.311477
CDH16010_20161104_PA10_17B	F	X	R	-0.526298	-0.29665	-0.354062	-0.354062	-0.239238	-0.526298	-0.354062	-0.526298	-0.239238	-0.29665	-0.29665	-0.526298	-0.411474	-0.354062	-0.124414	-0.411474	-0.239238	-0.411474	-0.29665	-0.468886	-0.181826	-0.239238	-0.239238	-0.0670016	-0.29665	-0.29665	0.162646	-0.00958961	-0.124414	-0.354062	-0.0670016	0.162646	-0.468886	-0.181826	-0.0670016	0.0478224	-0.0670016	-0.124414	-0.00958961	-0.354062
CDH16010_20161104_PA10_17C	F		R	-0.131708	-0.0107507	-0.0107507	-0.0712291	-0.131708	-0.0107507	-0.192186	-0.0712291	-0.131708	-0.192186	-0.0712291	-0.0712291	-0.192186	-0.131708	-0.494578	-0.373621	-0.131708	-0.313143	-0.0712291	-0.192186	-0.313143	0.170685	-0.4341	0.110206	-0.192186	0.110206	-0.0107507	-0.192186	-0.0712291	-0.192186	-0.0712291	-0.0712291	-0.0107507	-0.131708	-0.0712291	0.110206	-0.252665	-0.252665	-0.131708	-0.0712291
CDH16010_20161104_PA10_21A	F	X	L	-0.0908758	-0.0908758	-0.292436	-0.158063	0.0434978	-0.158063	-0.023689	-0.292436	-0.158063	0.110685	-0.158063	-0.0908758	0.446619	0.110685	-0.359623	-0.023689	-0.0908758	0.379432	0.0434978	-0.225249	-0.023689	0.110685	-0.158063	-0.023689	0.245058	0.110685	-0.023689	-0.023689	0.0434978	0.513805	0.110685	-0.158063	-0.023689	-0.0908758	0.0434978	-0.0908758	-0.225249	0.379432	-0.292436	-0.023689
CDH16010_20161104_PA10_21B	F		L	-0.158494	0.289092	0.126334	-0.117804	-0.0364252	0.167023	-0.158494	0.0449542	0.0856438	0.00426451	-0.0364252	-0.280563	-0.199184	0.0449542	0.126334	0.207713	0.126334	0.0449542	-0.117804	0.207713	-0.0771148	0.0856438	0.167023	0.00426451	0.0856438	-0.199184	0.00426451	-0.117804	0.167023	-0.0364252	-0.0364252	0.0856438	0.207713	0.207713	0.167023	0.126334	0.167023	0.00426451	0.00426451	-0.0771148
CDH16010_20161104_PA10_21C	F	X	L	0.219077	0.358659	0.405186	0.451714	0.358659	0.0329671	0.265604	0.265604	0.312132	0.312132	-0.19967	0.126022	-0.0135603	0.126022	0.358659	0.0794946	0.219077	-0.106615	0.126022	0.405186	-0.0600877	-0.0135603	0.126022	0.405186	-0.38578	0.0329671	0.312132	0.172549	0.126022	0.172549	0.172549	0.312132	-0.106615	0.0794946	0.126022	0.451714	-0.0600877	0.0329671	0.498241	0.172549
CDH16010_20161104_PA10_23A	F	X	L	-0.157033	0.239037	0.125874	0.0692925	0.125874	0.0127111	-0.0438704	0.0127111	0.125874	-0.157033	-0.213615	-0.326778	-0.270196	-0.0438704	-0.213615	-0.326778	-0.0438704	0.0692925	-0.100452	0.295618	0.295618	0.125874	0.182455	0.295618	-0.0438704	-0.0438704	0.0127111	0.0692925	0.182455	0.521944	0.0692925	0.295618	0.0692925	0.239037	0.125874	0.182455	0.125874	0.0127111	0.125874	-0.100452
CDH16010_20161104_PA10_23B	F	X	L	0.411385	-0.0715414	0.135427	0.307901	0.583859	0.618353	0.790827	0.756332	0.618353	0.44588	1.72219	0.721838	1.23926	0.756332	0.997796	1.10128	0.894311	0.790827	0.652848	0.859817	0.618353	0.618353	0.37689	0.514869	0.44588	0.411385	0.514869	0.169922	0.0664376	0.37689	0.273406	-0.106036	0.342396	-0.175026	0.0664376	-0.0025519	-0.0715414	0.204417	0.687343	-0.0370466
CDH16010_20161104_PA10_23C	F	X	L	0.0493745	0.152302	0.255229	0.306692	0.358156	0.461083	-0.105016	-0.15648	0.152302	0.409619	1.18157	0.718401	0.821328	0.512546	0.358156	0.56401	-0.0535525	0.203765	0.306692	0.100838	-0.15648	0.358156	0.0493745	-0.105016	0.512546	0.152302	-0.0535525	0.152302	0.56401	0.100838	0.152302	-0.00208899	0.100838	-0.00208899	0.203765	-0.105016	0.100838	0.100838	-0.00208899	0.409619
CDH16010_20161104_PA10_23D	F		L	0.49032	0.266575	-0.236851	-0.180915	-0.292788	-0.0690425	-0.180915	-0.292788	-0.348724	-0.348724	-0.124979	-0.180915	0.0987662	-0.180915	-0.124979	-0.180915	0.04283	-0.236851	0.04283	-0.124979	-0.236851	-0.0131063	-0.0690425	-0.236851	-0.0690425	-0.0690425	-0.180915	-0.0690425	0.0987662	0.0987662	-0.0131063	-0.0131063	0.04283	-0.180915	-0.348724	-0.292788	0.04283	-0.236851	-0.124979	-0.180915
CDH16010_20161104_PA10_23E	F	X	L	0.0144156	-0.149406	0.0144156	-0.204014	0.178238	0.12363	-0.204014	-0.313229	0.069023	-0.0947991	-0.0401917	0.069023	-0.0401917	0.232845	0.0144156	0.0144156	0.232845	0.069023	-0.0401917	-0.149406	-0.149406	0.12363	0.232845	0.069023	0.34206	-0.0947991	0.34206	0.232845	0.12363	0.34206	0.12363	-0.0947991	0.178238	0.12363	-0.0947991	-0.0947991	0.451275	0.505882	0.615097	0.669704
CDH16010_20161104_PA10_25A	F	X	L	-0.184148	-0.184148	-0.44326	-0.132325	-0.339615	-0.339615	-0.546905	-0.495082	-0.391438	-0.495082	-0.65055	-0.287793	-0.339615	-0.132325	-0.495082	-0.0286806	-0.184148	-0.184148	0.126787	-0.339615	-0.132325	-0.287793	-0.287793	-0.132325	-0.339615	-0.184148	-0.132325	-0.132325	-0.0805031	-0.0805031	-0.184148	-0.0805031	-0.0805031	-0.44326	-0.391438	0.0231418	-0.184148	-0.0286806	-0.0286806	-0.132325
CDH16010_20161104_PA10_25B	F		L	0.421829	0.171323	-0.229486	0.0210199	-0.329688	-0.129284	0.0711211	0.0711211	0.0210199	-0.179385	-0.179385	-0.0290812	0.121222	0.371728	0.221425	0.0711211	0.271526	0.0711211	0.221425	0.271526	0.121222	0.271526	0.221425	0.421829	0.421829	0.221425	0.271526	0.421829	0.672335	0.522032	0.522032	0.47193	0.47193	0.321627	0.321627	0.271526	0.47193	0.271526	0.672335	0.371728
CDH16010_20161104_PA10_25C	F		L	-0.300582	-0.202078	-0.103575	-0.054323	-0.300582	-0.300582	-0.202078	-0.448337	-0.349834	-0.349834	-0.497589	-0.300582	-0.596093	-0.25133	-0.103575	-0.202078	-0.00507119	0.191936	-0.054323	0.142684	0.142684	0.0934324	-0.103575	-0.103575	0.0934324	-0.00507119	-0.152827	0.0934324	0.142684	0.0441806	0.142684	-0.054323	0.0441806	0.339691	-0.054323	0.191936	0.142684	0.241188	-0.152827	0.142684
CDH16010_20161104_PA10_25D	F		L	-0.246331	-0.246331	-0.303383	-0.246331	-0.303383	-0.474542	-0.417489	-0.474542	-0.531595	-0.531595	-0.531595	-0.531595	-0.474542	-0.531595	-0.474542	-0.360436	-0.474542	-0.417489	-0.474542	-0.474542	-0.417489	-0.474542	-0.360436	-0.474542	-0.531595	-0.531595	-0.474542	-0.474542	-0.474542	-0.474542	-0.531595	-0.531595	-0.417489	-0.474542	-0.417489	-0.303383	-0.417489	-0.417489	-0.417489	-0.531595
CDH16010_20161104_PA10_27A	F	X	R	0.124806	0.0213627	0.400656	0.331694	0.469619	0.676506	0.400656	0.400656	0.642025	0.262731	0.676506	0.366175	0.5041	0.193769	0.5041	0.400656	0.710987	0.366175	0.262731	0.607544	0.538581	0.159288	0.435137	0.607544	0.297213	0.124806	0.262731	0.538581	0.331694	0.469619	0.469619	0.435137	0.469619	0.193769	0.400656	0.607544	0.193769	0.469619	0.642025	0.538581
CDH16010_20161104_PA10_27B	F	X	L	0.0924652	0.320383	0.64598	0.385503	0.61342	0.515741	0.971577	0.515741	1.13438	0.418062	0.450622	0.939017	0.776219	0.450622	0.352943	0.873898	0.515741	0.352943	0.352943	0.548301	0.0924652	0.222704	0.0599055	0.352943	0.255264	0.0924652	0.0924652	0.0599055	0.352943	0.255264	0.222704	-0.0703333	0.157585	0.0924652	-0.00521391	0.157585	0.320383	0.157585	0.320383	0.0599055
CDH16010_20161104_PA10_29A	F	X	R	0.0844858	-0.260984	-0.174617	-0.433719	-0.260984	0.041302	-0.476903	-0.476903	-0.347352	-0.433719	-0.476903	-0.563271	-0.390536	-0.520087	-0.390536	-0.433719	-0.433719	-0.520087	-0.390536	-0.433719	-0.304168	-0.304168	-0.476903	-0.304168	-0.217801	-0.433719	-0.304168	-0.433719	-0.304168	-0.476903	-0.390536	-0.347352	-0.390536	-0.433719	-0.476903	-0.476903	-0.433719	-0.476903	-0.174617	-0.390536
CDH16010_20161104_PA10_29B	F		R	0.233447	0.173379	-0.0668951	0.233447	0.11331	0.173379	-0.00682656	0.053242	-0.126964	-0.126964	-0.126964	-0.126964	-0.00682656	-0.187032	-0.307169	-0.307169	0.11331	-0.0668951	-0.187032	-0.307169	-0.247101	-0.247101	0.173379	-0.307169	-0.307169	-0.126964	-0.00682656	-0.187032	-0.187032	-0.0668951	-0.247101	-0.126964	-0.187032	-0.126964	-0.187032	-0.126964	-0.247101	-0.126964	-0.126964	-0.247101
CDH16010_20161104_PA10_29C	F	X	L	-0.00709243	-0.151206	-0.223263	0.353192	-0.00709243	-0.00709243	-0.0791494	-0.151206	-0.0791494	-0.223263	-0.151206	0.137022	-0.0791494	-0.29532	0.0649645	-0.367377	-0.0791494	-0.00709243	0.209078	0.137022	0.0649645	-0.00709243	0.0649645	0.425249	0.281135	-0.151206	-0.00709243	0.281135	0.209078	-0.00709243	-0.00709243	-0.00709243	-0.00709243	0.137022	-0.0791494	0.137022	0.209078	0.0649645	-0.0791494	0.209078
CDH16019_20161109_PA10_01A	M		R	0.0860533	0.29308	0.458701	0.127459	0.582918	0.872755	0.748539	0.624323	0.00324263	0.168864	0.210269	0.00324263	-0.0381627	-0.286595	-0.0381627	0.00324263	-0.120973	0.251675	0.251675	-0.245189	0.210269	-0.245189	-0.245189	-0.120973	-0.203784	-0.120973	0.044648	0.375891	0.334485	-0.0381627	0.251675	0.251675	0.127459	0.500107	0.417296	0.541512	0.210269	0.29308	0.541512	0.996971
CDH16019_20161109_PA10_03A	M	X	L	-0.395672	-0.395672	-0.395672	-0.211832	-0.257792	-0.119912	0.201807	0.339687	0.431607	0.477567	1.21293	0.799287	0.615447	0.293727	0.615447	0.0639275	0.293727	0.247767	0.0179676	-0.119912	-0.165872	-0.165872	-0.349712	-0.303752	-0.211832	-0.257792	-0.257792	-0.395672	-0.349712	-0.349712	-0.257792	-0.211832	-0.211832	-0.395672	-0.395672	-0.395672	-0.395672	-0.119912	0.0639275	0.339687
CDH16019_20161109_PA10_05A	M	X	R	0.762427	0.880965	1.26622	1.35512	1.17731	0.880965	0.880965	0.46608	0.0215604	-0.0377089	-0.511863	-0.482229	-0.600767	-0.630402	-0.541498	-0.245152	-0.304421	-0.0673436	-0.245152	-0.245152	-0.0969782	0.0511951	0.199368	0.199368	0.436446	0.436446	0.317907	0.703157	0.46608	0.258638	0.703157	1.14768	0.9106	0.732792	0.762427	0.792061	0.9106	0.821696	0.643888	0.732792
CDH16019_20161109_PA10_09A	M	X	R	-0.0151725	-0.0151725	-0.261081	-0.0151725	-0.179112	-0.0151725	-0.343051	-0.0151725	-0.0151725	-0.0151725	-0.179112	0.0667972	-0.179112	-0.343051	-0.179112	-0.0971421	-0.261081	-0.0151725	0.0667972	-0.343051	-0.261081	0.0667972	-0.0151725	-0.0971421	-0.0971421	-0.343051	-0.261081	0.0667972	-0.0151725	-0.0971421	-0.179112	-0.261081	0.0667972	0.394676	0.148767	-0.261081	0.148767	-0.0971421	0.0667972	0.0667972
CDH16019_20161109_PA10_17A	M		R	0.591968	0.193577	0.990358	0.591968	-0.0340743	-0.0340743	0.0228386	-0.0340743	-0.1479	-0.0340743	-0.261726	-0.0909872	0.0797516	0.0228386	0.193577	0.364316	0.0228386	-0.0909872	0.421229	0.762707	0.364316	0.819619	0.648881	0.307403	0.0797516	0.193577	0.0797516	0.421229	0.136664	0.193577	0.0797516	0.364316	0.25049	0.136664	0.0228386	0.136664	0.0797516	-0.0340743	0.307403	0.193577
CDH16019_20161109_PA10_21A	M		R	0.335346	0.1925	-0.0931936	0.049653	-0.23604	-0.0931936	-0.23604	-0.23604	-0.23604	0.335346	-0.0931936	-0.23604	-0.0931936	0.049653	0.049653	0.049653	-0.23604	0.049653	0.335346	-0.0931936	-0.23604	-0.0931936	-0.23604	-0.23604	-0.23604	-0.23604	0.049653	-0.0931936	-0.0931936	0.1925	0.1925	0.62104	0.1925	0.763886	0.049653	0.478193	0.478193	0.62104	0.1925	0.049653
EMR17002_20170707_PA10_01A	F	X	L	-0.189792	0.100953	0.391697	0.246325	-0.335165	0.246325	-0.0444198	-0.335165	0.827814	0.53707	0.827814	0.682442	0.682442	0.682442	0.827814	0.827814	0.53707	0.53707	-0.0444198	0.53707	-0.189792	-0.335165	0.391697	0.100953	-0.0444198	0.246325	0.100953	0.100953	0.246325	0.100953	0.246325	0.100953	0.391697	0.246325	0.391697	-0.189792	-0.335165	0.100953	0.100953	0.246325
EMR17002_20170707_PA10_03A	F		R	0.0716142	-0.142366	0.0716142	0.285594	0.285594	0.0716142	0.285594	-0.142366	0.285594	-0.142366	-0.142366	-0.356346	0.499574	-0.142366	-0.142366	0.499574	-0.356346	0.0716142	-0.356346	0.0716142	-0.142366	-0.356346	-0.142366	0.0716142	0.285594	0.0716142	0.713554	0.285594	0.499574	-0.142366	0.0716142	0.0716142	-0.356346	0.0716142	-0.356346	-0.142366	-0.142366	0.499574	0.499574	0.499574
EMR17002_20170707_PA10_05A	F	X	R	0.974775	1.3731	0.576451	0.974775	0.576451	0.875194	0.47687	-0.120616	0.377289	0.47687	-0.120616	-0.319778	-0.51894	-0.220197	-0.618521	-0.51894	-0.220197	-0.419359	-0.51894	-0.220197	-0.319778	-0.319778	-0.51894	-0.419359	-0.51894	0.078546	-0.0210351	-0.319778	-0.419359	-0.120616	-0.319778	-0.419359	-0.220197	-0.319778	-0.120616	-0.120616	-0.0210351	-0.120616	-0.419359	-0.120616
EMR17002_20170707_PA10_07A	F		L	0.082582	-0.439234	-0.249483	-0.0122936	-0.296921	0.13002	-0.0122936	0.272333	-0.0597314	0.794149	0.699274	1.45828	0.889025	0.746711	1.17365	0.462085	0.509522	0.13002	0.272333	-0.202045	-0.154607	-0.439234	0.224895	-0.0122936	-0.202045	0.0351442	-0.154607	0.319771	-0.0597314	-0.154607	-0.202045	0.272333	-0.249483	0.082582	-0.107169	0.082582	0.0351442	0.272333	0.319771	-0.391796
EMR17002_20170707_PA10_09A	F		R	0.0743246	1.00416	0.384271	0.229298	0.0743246	0.229298	0.384271	0.539244	0.384271	0.539244	-0.390595	0.229298	-0.235622	-0.235622	0.229298	-0.0806485	-0.235622	-0.0806485	0.84919	0.0743246	-0.235622	0.384271	0.539244	0.539244	0.539244	0.539244	0.539244	0.694217	0.384271	0.694217	0.539244	1.15914	0.229298	0.539244	-0.235622	-0.0806485	-0.0806485	0.384271	0.539244	0.539244
EMR17002_20170707_PA10_09B	F		L	-0.183939	-0.183939	-0.344781	-0.183939	-0.0230961	-0.0230961	-0.0230961	-0.344781	-0.344781	-0.344781	-0.344781	-0.505624	-0.183939	-0.0230961	-0.344781	-0.0230961	-0.344781	-0.505624	-0.505624	-0.344781	-0.344781	-0.344781	-0.0230961	-0.505624	-0.183939	-0.344781	-0.344781	-0.344781	-0.344781	-0.344781	-0.505624	0.137746	-0.344781	-0.505624	-0.183939	-0.505624	-0.505624	-0.505624	-0.344781	-0.344781
EMR17002_20170707_PA10_11A	F		L	0.329146	0.509603	-0.121997	0.419375	-0.212226	-0.121997	0.599832	0.780289	0.599832	0.599832	0.690061	0.780289	0.599832	0.690061	0.599832	0.870518	0.780289	0.329146	-0.121997	0.148689	-0.121997	-0.302455	0.419375	-0.0317688	0.148689	-0.212226	-0.121997	0.238917	0.148689	0.329146	-0.0317688	-0.482912	-0.0317688	0.329146	0.329146	-0.212226	0.329146	0.509603	0.329146	-0.302455
EMR17002_20170707_PA10_13A	F		L	0.165171	-0.311281	0.641623	0.165171	0.403397	0.403397	0.165171	0.641623	0.165171	-0.311281	0.641623	0.641623	-0.311281	0.403397	0.403397	0.403397	0.641623	0.165171	0.403397	-0.0730551	0.165171	0.403397	0.403397	0.403397	0.641623	0.165171	-0.0730551	0.403397	0.641623	-0.0730551	0.403397	0.165171	0.403397	0.165171	0.403397	0.165171	0.165171	0.165171	-0.311281	-0.311281
EMR17002_20170707_PA10_19A	F		R	0.676108	1.04145	0.858777	0.31077	1.77212	0.676108	1.58945	-0.237237	0.128101	-0.419906	-0.0545677	-0.0545677	-0.0545677	-0.237237	-0.0545677	-0.237237	-0.419906	-0.0545677	0.31077	0.31077	-0.237237	-0.237237	-0.237237	0.31077	-0.237237	-0.237237	-0.0545677	-0.0545677	-0.0545677	0.31077	0.31077	-0.0545677	-0.237237	-0.0545677	0.31077	0.31077	0.128101	-0.0545677	-0.0545677	0.493439
EMR17002_20170707_PA10_21A	F		R	0.209343	-0.191267	-0.191267	-0.191267	-0.191267	0.209343	0.609953	0.209343	0.209343	0.209343	-0.191267	-0.191267	0.209343	-0.191267	-0.191267	0.209343	0.209343	-0.191267	-0.191267	-0.191267	0.209343	-0.191267	0.209343	0.209343	0.209343	0.209343	-0.191267	0.209343	-0.191267	-0.191267	-0.191267	0.209343	-0.191267	-0.191267	-0.191267	-0.191267	-0.191267	-0.191267	-0.191267	-0.191267
EMR17002_20170707_PA10_23A	F		R	-0.121636	0.462635	0.345781	-0.00478169	0.462635	-0.355344	-0.23849	0.112073	0.345781	-0.121636	0.112073	0.228927	-0.00478169	0.228927	0.112073	0.112073	0.112073	0.462635	-0.121636	0.228927	0.345781	0.112073	0.579489	0.579489	0.462635	0.345781	0.345781	0.345781	0.228927	0.112073	0.345781	0.462635	0.462635	0.462635	0.228927	0.345781	0.228927	0.813198	0.345781	0.112073
EMR17002_20170707_PA10_23B	F	X	L	0.567996	-0.0844888	0.133006	0.78549	0.567996	0.78549	0.133006	0.567996	0.350501	1.87296	1.22048	1.43797	1.43797	1.22048	1.00299	0.567996	-0.0844888	1.00299	0.350501	0.350501	0.350501	0.567996	0.78549	0.78549	0.78549	0.567996	0.133006	0.350501	0.133006	-0.0844888	0.567996	1.00299	0.350501	0.133006	0.133006	-0.0844888	0.78549	0.350501	0.567996	0.567996
EMR17002_20170707_PA10_27A	F			-0.167444	0.290775	-0.167444	-0.167444	-0.167444	0.290775	-0.167444	0.290775	-0.167444	-0.167444	0.290775	0.290775	0.290775	-0.167444	-0.167444	-0.167444	-0.167444	0.290775	-0.167444	-0.167444	0.290775	-0.167444	-0.167444	-0.167444	-0.167444	-0.167444	-0.167444	-0.167444	-0.167444	0.748994	-0.167444	-0.167444	-0.167444	-0.167444	-0.167444	0.290775	-0.167444	-0.167444	0.748994	-0.167444
EMR17002_20170707_PA10_31A	F	X	L	0.284594	1.11291	0.560701	1.66513	0.836807	0.560701	1.11291	0.284594	0.560701	0.836807	0.284594	-0.267619	1.38902	0.836807	0.284594	0.560701	0.284594	1.11291	1.38902	0.560701	0.836807	0.836807	1.38902	1.66513	0.560701	1.94123	0.00848744	0.284594	0.560701	0.836807	0.560701	0.836807	0.00848744	-0.267619	0.284594	0.284594	0.284594	0.00848744	0.00848744	0.00848744
EMR17002_20170707_PA10_31B	F		L	-0.222238	-0.222238	-0.222238	0.0135036	0.249245	0.0135036	0.0135036	0.0135036	0.0135036	-0.222238	-0.222238	0.249245	0.0135036	0.0135036	-0.222238	-0.222238	-0.222238	-0.222238	-0.222238	0.0135036	-0.222238	-0.222238	-0.222238	-0.222238	-0.222238	-0.222238	-0.222238	-0.222238	-0.222238	-0.222238	-0.222238	-0.222238	0.0135036	-0.222238	-0.222238	-0.222238	0.0135036	-0.222238	-0.222238	-0.222238
EMR17004_20170703_PA10_03A	F			-0.216291	-0.216291	0.0389596	0.0389596	-0.216291	-0.216291	0.0389596	0.0389596	-0.216291	0.0389596	-0.216291	-0.216291	-0.216291	-0.216291	-0.216291	-0.216291	-0.216291	-0.216291	-0.216291	-0.216291	-0.216291	-0.216291	-0.216291	-0.216291	-0.216291	-0.216291	-0.216291	-0.216291	-0.216291	-0.216291	-0.216291	-0.216291	-0.216291	-0.216291	-0.216291	-0.216291	-0.216291	-0.216291	-0.216291	-0.216291
EMR17004_20170703_PA10_03B	F		R	0.126469	-0.275442	0.126469	-0.0744864	0.126469	-0.476398	-0.275442	-0.476398	-0.275442	-0.476398	-0.476398	-0.476398	-0.476398	-0.476398	-0.275442	-0.275442	-0.476398	-0.0744864	-0.275442	-0.0744864	-0.275442	-0.275442	-0.275442	-0.0744864	-0.0744864	0.126469	-0.275442	-0.0744864	-0.275442	-0.476398	-0.275442	-0.476398	-0.0744864	-0.476398	-0.0744864	-0.0744864	0.327425	-0.476398	-0.275442	-0.275442
EMR17004_20170703_PA10_11A	F		R	0.0519935	0.0519935	-0.254385	-0.254385	-0.254385	-0.254385	-0.254385	0.358372	-0.254385	-0.254385	0.0519935	-0.254385	0.0519935	-0.254385	-0.254385	0.0519935	-0.254385	0.0519935	0.66475	-0.254385	0.358372	-0.254385	0.66475	-0.254385	-0.254385	0.0519935	0.358372	0.358372	0.0519935	-0.254385	0.0519935	0.0519935	0.358372	0.66475	0.358372	0.66475	-0.254385	-0.254385	0.0519935	0.358372
EMR17004_20170703_PA10_11B	F		R	-0.352092	0.079534	-0.0643414	-0.352092	-0.0643414	-0.208217	-0.208217	-0.0643414	-0.208217	-0.208217	-0.208217	-0.495968	-0.495968	-0.639843	-0.0643414	-0.208217	-0.208217	-0.0643414	-0.0643414	-0.208217	-0.352092	-0.352092	-0.352092	-0.495968	-0.352092	-0.208217	-0.208217	-0.495968	-0.0643414	-0.208217	-0.208217	-0.495968	-0.352092	-0.208217	-0.0643414	-0.352092	-0.0643414	-0.208217	-0.495968	-0.639843
EMR17004_20170703_PA10_13A	F		L	-0.158375	0.0606884	-0.377439	-0.158375	-0.377439	-0.158375	0.279752	-0.158375	1.15601	0.0606884	0.0606884	0.279752	0.498815	-0.158375	0.0606884	0.0606884	0.279752	0.0606884	0.279752	-0.377439	-0.158375	-0.377439	0.279752	-0.158375	-0.158375	-0.377439	-0.377439	0.0606884	-0.377439	-0.377439	-0.158375	-0.158375	-0.158375	-0.158375	0.0606884	0.0606884	0.498815	0.0606884	0.0606884	-0.158375
EMR17004_20170703_PA10_17A	F	X	R	-0.0581424	0.554435	-0.262335	0.14605	0.96282	-0.0581424	0.554435	0.96282	0.554435	-0.0581424	-0.0581424	-0.262335	-0.0581424	-0.262335	-0.262335	-0.0581424	-0.262335	-0.262335	-0.0581424	-0.262335	0.554435	0.350243	0.350243	0.758627	0.350243	0.14605	0.14605	1.3712	0.554435	0.758627	0.350243	0.14605	-0.0581424	0.350243	0.554435	0.758627	0.14605	-0.0581424	0.554435	-0.0581424
EMR17004_20170703_PA10_17B	F		L	0.14593	-0.33553	-0.33553	-0.33553	-0.0948	-0.33553	-0.33553	-0.33553	-0.0948	1.10885	1.59031	0.38666	-0.0948	0.14593	0.14593	0.868121	0.38666	-0.0948	0.14593	-0.33553	0.14593	0.14593	-0.0948	0.627391	0.38666	-0.0948	0.627391	0.627391	0.14593	0.14593	0.14593	-0.33553	0.627391	-0.0948	0.38666	0.14593	0.14593	0.38666	0.14593	0.14593
EMR17006_20170717_PA10_01A	M	X	L	-0.172728	0.0598197	-0.172728	0.0598197	-0.172728	0.0598197	0.292367	-0.172728	0.292367	0.292367	0.0598197	0.292367	0.524915	0.292367	-0.172728	-0.172728	0.292367	-0.172728	0.0598197	-0.172728	-0.172728	0.0598197	0.0598197	-0.172728	-0.172728	-0.172728	-0.172728	-0.172728	-0.172728	0.292367	0.0598197	0.0598197	0.0598197	-0.172728	0.0598197	0.292367	0.292367	-0.172728	-0.172728	0.292367
EMR17006_20170717_PA10_03A	M		R	-0.444472	-0.444472	-0.444472	-0.444472	-0.444472	-0.444472	-0.444472	-0.444472	-0.444472	-0.444472	-0.444472	-0.444472	-0.444472	-0.444472	-0.444472	-0.444472	-0.444472	-0.444472	-0.444472	-0.444472	-0.350324	-0.444472	-0.444472	-0.444472	-0.444472	-0.350324	-0.444472	-0.444472	-0.444472	-0.444472	-0.444472	-0.444472	-0.444472	-0.444472	-0.444472	-0.444472	-0.444472	-0.444472	-0.444472	-0.444472
EMR17006_20170717_PA10_03B	M		L	-0.214016	-0.214016	-0.214016	-0.100332	-0.214016	0.0133525	-0.100332	-0.100332	0.127037	0.0133525	-0.100332	0.0133525	0.127037	-0.327701	-0.327701	0.0133525	0.354406	0.354406	-0.100332	-0.100332	-0.214016	-0.214016	-0.214016	0.0133525	-0.100332	0.127037	-0.100332	0.240721	-0.327701	-0.100332	-0.100332	-0.327701	-0.100332	-0.100332	-0.100332	-0.100332	0.127037	-0.214016	-0.100332	-0.214016
EMR17006_20170717_PA10_05A	M		L	-0.151749	-0.288703	-0.0832712	-0.357181	-0.425658	-0.425658	-0.357181	-0.357181	-0.357181	-0.151749	-0.0147938	-0.357181	-0.425658	-0.151749	-0.425658	-0.494136	-0.425658	-0.151749	-0.288703	-0.220226	-0.288703	-0.357181	-0.151749	-0.425658	-0.357181	-0.220226	-0.425658	-0.425658	-0.220226	-0.288703	-0.494136	-0.151749	-0.425658	-0.151749	-0.357181	-0.357181	-0.425658	-0.425658	-0.357181	-0.357181
EMR17006_20170717_PA10_07A	M	X	R	-0.190501	-0.190501	-0.190501	-0.190501	0.0175095	0.22552	-0.190501	-0.190501	-0.190501	-0.190501	0.433531	-0.190501	0.0175095	-0.190501	0.0175095	-0.190501	0.433531	0.22552	-0.190501	0.0175095	-0.190501	0.0175095	0.22552	-0.190501	0.641542	0.0175095	0.0175095	0.0175095	0.0175095	0.22552	0.0175095	1.05756	0.0175095	0.433531	0.22552	0.22552	0.0175095	0.0175095	0.22552	0.22552
EMR17006_20170717_PA10_09A	M	X	R	1.22983	1.06256	0.811663	1.06256	0.644396	0.811663	0.72803	0.97893	0.226229	0.393496	0.142595	0.142595	0.0589616	0.477129	0.309862	0.644396	0.226229	0.72803	0.72803	0.477129	0.560763	1.1462	0.811663	1.1462	0.895297	0.644396	0.97893	1.73163	0.895297	1.81526	1.31346	1.81526	1.8989	1.3971	1.31346	1.648	1.56436	1.48073	1.06256	1.1462
EMR17006_20170717_PA10_09B	M	X	R	0.480767	0.779991	0.630379	0.480767	-0.117681	0.331155	0.331155	0.031931	-0.117681	0.181543	-0.267293	-0.117681	-0.267293	-0.267293	-0.117681	-0.117681	-0.117681	-0.117681	0.181543	0.181543	0.031931	0.181543	0.031931	0.331155	0.181543	0.031931	0.031931	0.331155	0.630379	0.630379	0.181543	0.779991	0.331155	0.630379	1.22883	-0.117681	0.181543	0.630379	1.22883	0.480767
EMR17006_20170717_PA10_11A	M		R	-0.188536	-0.188536	-0.188536	-0.188536	0.0699586	0.0699586	-0.0592889	-0.188536	0.0699586	-0.188536	-0.0592889	-0.188536	-0.188536	-0.188536	-0.188536	-0.188536	-0.188536	-0.188536	-0.188536	-0.188536	-0.0592889	-0.0592889	-0.188536	-0.188536	0.328454	-0.0592889	0.0699586	-0.0592889	0.0699586	-0.0592889	-0.188536	-0.188536	-0.188536	-0.188536	-0.0592889	-0.188536	-0.188536	-0.188536	-0.188536	-0.188536
EMR17006_20170717_PA10_11B	M		L	-0.504301	-0.504301	-0.57066	-0.637019	-0.504301	-0.637019	-0.504301	-0.637019	-0.504301	-0.504301	-0.57066	-0.637019	-0.637019	-0.504301	-0.57066	-0.637019	-0.504301	-0.637019	-0.57066	-0.637019	-0.57066	-0.637019	-0.504301	-0.504301	-0.57066	-0.637019	-0.637019	-0.371584	-0.57066	-0.437943	-0.637019	-0.637019	-0.504301	-0.637019	-0.57066	-0.57066	-0.637019	-0.437943	-0.437943	-0.57066
EMR17006_20170717_PA10_11C	M	X	R	-0.346395	-0.346395	-0.21425	-0.21425	-0.346395	-0.280323	-0.280323	-0.0160322	-0.21425	0.182186	0.0500405	0.182186	0.0500405	0.0500405	-0.0160322	-0.346395	-0.478541	-0.412468	-0.21425	-0.412468	-0.412468	-0.412468	-0.148177	-0.280323	-0.346395	-0.478541	-0.544613	-0.346395	-0.412468	-0.412468	-0.148177	-0.346395	-0.544613	-0.412468	-0.412468	-0.478541	-0.280323	-0.280323	-0.280323	-0.412468
EMR17006_20170717_PA10_11D	M	X	R	0.144081	0.367558	0.25582	0.479296	0.479296	0.963496	1.03799	1.3732	1.55943	2.04363	2.22986	2.4161	2.67682	2.49059	1.70842	1.55943	1.55943	1.00074	0.591035	0.777265	0.553789	0.479296	0.404804	0.44205	0.144081	-0.0793956	0.330312	0.218573	-0.00490337	0.404804	0.144081	-0.0421495	0.106835	0.144081	0.218573	0.0323428	0.144081	0.516542	0.404804	0.106835
EMR17006_20170717_PA10_13A	M			0.867466	1.5458	1.31969	1.39506	0.792096	0.867466	0.113766	0.189136	0.113766	-0.187714	-0.187714	0.113766	-0.0369738	-0.187714	-0.187714	-0.338454	-0.338454	-0.263084	-0.187714	-0.0369738	-0.263084	-0.187714	0.113766	-0.263084	-0.187714	0.490616	0.189136	0.189136	0.113766	0.113766	0.716726	1.09358	0.867466	0.264506	0.189136	0.565986	1.24432	1.01821	1.99801	1.7719
EMR17006_20170717_PA10_15A	M	X	L	-0.273919	0.0849849	0.0197297	0.346006	0.411261	0.15024	0.509144	0.672282	1.09644	1.22695	1.35746	1.32483	1.12907	1.06381	0.476517	0.607027	0.672282	0.346006	0.313378	0.443889	0.215495	0.313378	0.0849849	0.378634	0.378634	-0.0455256	0.182868	0.346006	0.476517	-0.0128979	0.443889	-0.469685	0.0197297	0.0523573	0.0849849	0.248123	0.117613	0.117613	0.313378	0.476517
EMR17006_20170717_PA10_15B	M	X	R	0.0272188	-0.267181	-0.443821	-0.326061	-0.384941	-0.384941	-0.384941	-0.267181	-0.384941	-0.384941	-0.384941	-0.326061	-0.502701	-0.443821	-0.443821	-0.326061	-0.384941	-0.502701	-0.267181	-0.0905412	-0.326061	-0.0316612	-0.208301	-0.267181	-0.149421	-0.0905412	-0.149421	-0.326061	-0.208301	-0.0905412	-0.443821	-0.208301	-0.384941	-0.443821	-0.267181	-0.384941	-0.443821	-0.326061	-0.0905412	-0.384941
EMR17006_20170717_PA10_15C	M	X	L	-0.0757634	-0.335288	-0.0757634	-0.292034	-0.421796	-0.551559	-0.767829	-0.594813	-0.940846	-0.854338	-0.811084	-0.811084	-0.681321	-0.378542	-0.162272	-0.205526	0.0539989	0.227015	0.48654	0.356778	0.529794	0.616303	0.702811	0.400032	0.313524	0.659557	0.48654	0.183761	0.227015	0.400032	0.616303	0.27027	0.356778	0.400032	0.529794	0.183761	0.227015	0.27027	-0.0757634	-0.162272
EMR17006_20170717_PA10_17A	M	X	L	-0.0472823	-0.0472823	0.0424511	0.132184	0.0424511	-0.137016	-0.137016	-0.0472823	0.0424511	-0.0472823	0.221918	0.311651	0.311651	0.311651	0.311651	-0.137016	-0.0472823	0.0424511	-0.226749	0.221918	-0.0472823	-0.137016	0.760318	0.221918	0.221918	0.132184	-0.0472823	-0.137016	0.491118	0.132184	0.670585	0.0424511	0.132184	0.311651	0.0424511	-0.226749	-0.0472823	-0.226749	-0.137016	0.132184
EMR17006_20170717_PA10_17B	M		R	0.127214	0.127214	-0.230567	-0.0516766	-0.0516766	-0.230567	-0.230567	-0.230567	-0.230567	-0.0516766	-0.0516766	-0.230567	-0.0516766	-0.230567	-0.0516766	-0.230567	0.127214	-0.230567	0.127214	-0.0516766	0.127214	0.127214	-0.230567	-0.0516766	-0.230567	0.127214	-0.230567	-0.0516766	0.127214	-0.0516766	0.127214	-0.0516766	0.484995	-0.230567	0.484995	0.127214	-0.0516766	-0.0516766	-0.0516766	-0.0516766
EMR17006_20170717_PA10_19A	M	X	L	-0.43836	-0.35761	-0.478735	-0.519109	-0.478735	-0.478735	-0.559484	-0.519109	-0.559484	-0.559484	-0.519109	-0.559484	-0.519109	-0.559484	-0.519109	-0.559484	-0.559484	-0.559484	-0.519109	-0.478735	-0.559484	-0.478735	-0.478735	-0.43836	-0.478735	-0.559484	-0.43836	-0.27686	-0.519109	-0.519109	-0.559484	-0.43836	-0.43836	-0.519109	-0.478735	-0.43836	-0.35761	-0.155736	-0.317235	-0.43836
EMR17006_20170717_PA10_19B	M	X	R	1.18009	1.18009	0.479354	1.18009	1.35527	0.829722	1.00491	1.70564	0.30417	0.654538	0.654538	0.30417	0.479354	0.654538	-0.0461975	0.128986	0.128986	-0.0461975	0.128986	-0.0461975	-0.0461975	0.654538	0.479354	0.128986	-0.0461975	0.128986	0.128986	0.128986	-0.221381	-0.221381	-0.0461975	0.654538	0.30417	0.654538	0.30417	0.30417	0.829722	0.654538	1.18009	0.829722
EMR17006_20170717_PA10_23A	M		R	-0.533738	-0.613004	-0.692271	-0.414839	-0.494105	-0.533738	-0.375206	-0.494105	-0.375206	-0.771537	-0.454472	-0.335573	-0.454472	-0.256307	-0.375206	-0.573371	-0.335573	-0.454472	-0.216674	-0.414839	-0.414839	-0.613004	-0.533738	-0.216674	-0.731904	-0.573371	-0.692271	-0.494105	-0.177041	-0.414839	-0.29594	-0.29594	-0.454472	-0.573371	-0.652638	-0.375206	-0.29594	-0.613004	-0.375206	-0.494105
EMR17006_20170717_PA10_25A	M	X	L	0.444818	0.56164	0.795285	1.02893	1.02893	1.49622	2.19716	1.61304	1.84669	3.4822	4.06632	3.13174	1.14575	1.49622	1.14575	1.3794	0.678463	0.795285	1.61304	0.56164	0.56164	0.795285	0.795285	0.56164	0.211172	0.211172	-0.139295	-0.0224727	-0.139295	0.0943498	-0.0224727	0.0943498	-0.0224727	0.0943498	-0.139295	0.0943498	-0.0224727	0.444818	0.211172	-0.139295
EMR17006_20170717_PA10_27A	M	X	L	-0.516269	-0.516269	-0.662499	-0.589384	-0.772172	-0.662499	-0.735614	-0.881844	-0.772172	-0.333482	-0.808729	-0.662499	-0.552827	-0.625942	-0.516269	-0.516269	-0.406597	-0.443154	-0.699057	-0.406597	-0.552827	-0.552827	-0.37004	-0.552827	-0.260367	-0.699057	-0.552827	-0.662499	-0.37004	-0.443154	-0.625942	-0.625942	-0.808729	-0.625942	-0.699057	-0.699057	-0.662499	-0.589384	-0.699057	-0.845286
EMR17006_20170717_PA10_27B	M		R	0.0373248	0.0373248	0.0373248	-0.135875	0.0373248	-0.135875	-0.135875	-0.135875	-0.135875	-0.135875	-0.135875	-0.135875	-0.135875	-0.135875	-0.135875	-0.135875	-0.135875	-0.135875	-0.135875	-0.135875	0.0373248	0.0373248	-0.135875	-0.135875	-0.135875	0.210524	-0.135875	-0.135875	-0.135875	-0.135875	-0.135875	0.210524	0.210524	-0.135875	0.0373248	0.0373248	-0.135875	0.0373248	-0.135875	-0.135875
EMR17007_20170622_PA10_01A	M	X	R	0.144795	0.300964	0.196852	0.509188	0.300964	0.457132	0.300964	0.561244	0.0406834	0.144795	0.248908	0.248908	-0.0113727	-0.167541	-0.323709	-0.323709	-0.271653	0.0927394	-0.167541	-0.0113727	-0.115485	-0.167541	0.0406834	-0.115485	-0.167541	-0.0634287	-0.115485	0.248908	-0.115485	0.248908	-0.0113727	0.300964	0.0406834	0.35302	-0.0113727	0.144795	0.144795	0.0406834	0.248908	-0.0113727
EMR17007_20170622_PA10_03A	M	X	L	-0.357492	-0.313158	-0.357492	-0.0914837	-0.224488	-0.268823	-0.047149	-0.490497	-0.446162	-0.534832	-0.579166	-0.446162	-0.401827	-0.401827	-0.224488	-0.357492	-0.224488	-0.224488	-0.180153	-0.268823	-0.446162	-0.534832	-0.490497	-0.534832	-0.224488	-0.534832	-0.490497	-0.224488	-0.047149	-0.623501	-0.313158	-0.490497	-0.490497	-0.446162	-0.401827	-0.534832	-0.401827	-0.446162	-0.357492	-0.313158
EMR17007_20170622_PA10_03B	M	X	R	0.522278	0.072988	-0.0767753	-0.0767753	-0.00189368	0.222751	0.672041	0.59716	0.14787	0.372515	0.372515	-0.00189368	-0.151657	0.072988	-0.00189368	-0.30142	-0.00189368	-0.151657	-0.0767753	-0.30142	-0.30142	-0.226539	-0.00189368	-0.30142	-0.226539	-0.00189368	-0.526065	-0.00189368	-0.376302	-0.451184	-0.00189368	-0.451184	-0.30142	-0.151657	0.072988	0.522278	0.222751	0.14787	0.222751	0.672041
EMR17007_20170622_PA10_05A	M		L	-0.0782252	-0.0782252	-0.405513	-0.323691	-0.405513	0.00359666	0.16724	-0.160047	-0.241869	-0.160047	-0.241869	-0.160047	-0.241869	-0.160047	-0.405513	0.249062	-0.160047	0.00359666	-0.241869	0.249062	-0.241869	-0.160047	-0.241869	0.00359666	-0.160047	-0.160047	-0.323691	-0.0782252	-0.0782252	0.00359666	-0.0782252	-0.160047	-0.241869	-0.405513	-0.323691	-0.323691	0.00359666	-0.241869	-0.160047	-0.160047
EMR17007_20170622_PA10_05B	M		R	-0.158729	0.364719	0.364719	0.15534	-0.054039	-0.368108	-0.054039	-0.054039	0.0506505	-0.263418	-0.054039	-0.158729	0.0506505	-0.158729	0.26003	-0.054039	-0.263418	-0.054039	0.364719	0.364719	0.364719	0.15534	0.0506505	0.0506505	-0.263418	0.364719	-0.158729	0.0506505	-0.158729	-0.158729	-0.054039	-0.263418	0.0506505	-0.158729	-0.263418	-0.158729	-0.158729	-0.158729	0.678788	0.0506505
EMR17007_20170622_PA10_07A	M		R	1.40753	1.52643	0.813042	0.892308	1.56607	1.32827	1.05084	0.813042	0.575245	0.0996509	-0.296678	0.258182	-0.0588805	-0.0588805	-0.217412	-0.33631	0.0203852	-0.33631	-0.455209	-0.296678	-0.257045	-0.375943	-0.415576	-0.415576	0.0600181	0.0203852	0.258182	0.456347	0.337448	0.456347	0.416714	0.931941	0.139284	0.297815	0.258182	0.931941	0.218549	0.297815	0.614878	0.614878
EMR17007_20170622_PA10_09A	M	X	L	0.383995	0.114344	0.417702	0.181757	-0.0204811	0.552527	0.788472	-0.0541875	0.61994	0.383995	0.754766	-0.290132	-0.290132	-0.0878939	-0.0204811	-0.155307	0.0132252	0.24917	0.350289	0.485115	0.721059	0.181757	0.0132252	0.080638	-0.0878939	-0.222719	-0.0878939	0.0132252	0.148051	0.451408	0.0469316	0.181757	-0.0878939	0.181757	0.383995	0.383995	0.383995	0.114344	0.114344	0.114344
EMR17007_20170622_PA10_09B	M	X	R	0.145216	-0.230973	0.0616185	-0.105577	0.103417	0.312412	-0.105577	0.270613	0.35421	-0.272772	-0.0219792	-0.189175	-0.189175	0.145216	-0.272772	0.0198197	-0.314571	-0.314571	-0.0219792	-0.189175	-0.272772	-0.189175	0.0616185	-0.189175	-0.189175	0.187015	0.187015	0.0616185	0.35421	0.187015	-0.105577	0.187015	-0.0219792	0.187015	0.270613	0.772199	0.228814	0.145216	0.0198197	0.0198197
EMR17007_20170622_PA10_11A	M		L	-0.0370986	0.162015	0.692986	0.294758	0.493872	0.626615	0.0956441	0.228387	-0.0370986	-0.10347	0.427501	-0.302584	-0.302584	-0.10347	-0.302584	-0.0370986	-0.236213	0.0956441	-0.10347	0.0292727	-0.236213	-0.236213	0.0956441	-0.169841	0.162015	-0.0370986	0.0956441	0.0292727	-0.10347	0.493872	0.0956441	0.560243	0.0956441	0.162015	0.560243	0.560243	1.09121	0.692986	0.294758	0.626615
EMR17007_20170622_PA10_11B	M	X	R	0.115962	0.26907	0.166998	0.779428	0.575285	0.830464	1.23875	0.779428	0.473213	0.166998	0.166998	0.166998	-0.241289	-0.190253	-0.0371454	-0.241289	-0.0881812	-0.0881812	-0.0371454	0.0138904	-0.241289	0.166998	-0.0371454	0.218034	-0.190253	-0.0881812	-0.190253	0.26907	-0.0371454	0.0649263	-0.0371454	0.26907	0.218034	0.575285	1.13668	0.524249	0.728392	0.575285	0.166998	0.0649263
EMR17007_20170622_PA10_17A	M		L	-0.152996	0.11039	0.198185	0.198185	0.373776	0.11039	0.0225946	-0.152996	0.11039	-0.328587	-0.240792	-0.152996	-0.240792	-0.240792	-0.152996	-0.240792	0.285981	0.11039	-0.152996	0.11039	-0.152996	0.0225946	-0.152996	-0.152996	0.11039	-0.0652008	-0.152996	0.0225946	0.198185	0.198185	-0.152996	0.0225946	-0.240792	-0.152996	-0.240792	0.461572	0.198185	0.198185	0.461572	-0.0652008
EMR17007_20170622_PA10_17B	M		R	0.175113	0.386403	-0.0361766	0.492048	0.280758	0.175113	0.386403	0.280758	-0.141821	-0.247466	-0.247466	-0.247466	-0.247466	-0.0361766	-0.0361766	0.0694682	-0.0361766	0.0694682	0.175113	-0.0361766	-0.247466	-0.247466	-0.141821	-0.247466	-0.247466	-0.141821	-0.141821	0.0694682	0.0694682	0.0694682	0.597692	0.280758	-0.247466	0.175113	-0.0361766	0.280758	0.0694682	0.386403	-0.0361766	-0.0361766
EMR17007_20170622_PA10_23A	M	X	L	0.325453	-0.191966	0.325453	-0.163221	0.0092523	-0.191966	-0.0769842	0.0092523	0.239216	0.382944	0.72789	0.612908	0.497926	0.267962	0.181725	0.181725	0.0092523	-0.0482387	-0.10573	0.0379978	0.267962	0.15298	-0.10573	0.0954888	-0.10573	-0.42193	-0.0194932	-0.393185	-0.42193	0.0092523	-0.0194932	-0.220712	-0.364439	-0.0194932	-0.249457	0.0954888	0.124234	0.354198	0.0092523	-0.134475
EMR17007_20170622_PA10_23B	M	X	R	-0.153593	-0.0619843	0.0296248	0.0296248	-0.245202	-0.336811	-0.0619843	-0.153593	0.212843	0.212843	0.579279	-0.245202	0.0296248	0.121234	-0.0619843	0.212843	0.212843	0.0296248	0.0296248	0.304452	-0.0619843	0.0296248	0.854107	-0.153593	0.0296248	0.0296248	-0.245202	-0.153593	0.0296248	-0.245202	-0.245202	-0.245202	-0.0619843	-0.0619843	-0.245202	-0.153593	-0.336811	-0.0619843	0.121234	0.121234
EMR17007_20170622_PA10_27A	M	X	L	-0.0226976	-0.337277	0.0402184	-0.211445	0.228966	-0.14853	-0.211445	-0.0226976	-0.14853	0.103134	0.103134	0.0402184	-0.211445	-0.211445	-0.211445	-0.337277	0.354798	0.16605	0.291882	0.543546	1.36145	0.79521	0.732294	0.921042	1.29854	0.417714	0.669378	0.606462	0.669378	0.16605	0.48063	0.354798	-0.0856135	0.291882	-0.0856135	-0.274361	-0.14853	-0.0856135	-0.0226976	-0.0856135
EMR17007_20170622_PA10_27B	M	X	R	0.255411	0.666522	0.255411	0.783982	1.13636	1.07763	1.54747	0.960173	0.314141	0.431602	0.137951	0.079221	-0.0382392	0.0204909	0.0204909	0.079221	-0.155699	0.137951	-0.27316	0.255411	0.255411	0.0204909	0.314141	0.196681	0.079221	-0.21443	-0.0969693	0.490332	0.842712	0.960173	0.901443	1.25382	1.37128	1.25382	1.19509	1.0189	1.13636	0.960173	0.725252	0.549062
EMR17007_20170622_PA10_27C	M	X	R	0.381075	0.555353	-0.0546225	0.0325169	-0.0546225	0.468214	0.0325169	0.0325169	0.293935	0.119656	-0.141762	-0.0546225	-0.141762	0.206796	-0.228901	-0.141762	0.119656	-0.0546225	0.0325169	-0.0546225	-0.141762	-0.228901	-0.0546225	0.119656	-0.141762	0.468214	-0.316041	0.468214	-0.0546225	0.206796	0.381075	0.0325169	-0.0546225	-0.0546225	-0.0546225	0.903911	0.206796	0.0325169	0.0325169	-0.0546225
EMR17008_20170718_PA10_01A	M		L	-0.118861	-0.118861	-0.222677	0.192585	-0.0150457	1.02311	0.815478	0.607847	1.12692	0.815478	1.02311	0.192585	0.296401	0.192585	0.192585	0.296401	0.607847	0.711663	0.400216	0.504032	0.400216	0.400216	0.0887698	0.504032	0.192585	0.0887698	0.192585	-0.430308	-0.118861	-0.326492	-0.118861	0.192585	-0.0150457	-0.222677	0.192585	0.192585	-0.222677	-0.118861	0.0887698	0.711663
EMR17008_20170718_PA10_03A	M	X	L	0.144111	0.543986	-0.0558268	0.444017	0.044142	0.144111	-0.0558268	0.543986	0.344049	0.743924	1.1438	1.74361	2.44339	1.64364	2.34343	1.84358	2.14349	1.44371	1.94355	1.44371	1.44371	2.04352	1.04383	1.24377	0.843893	1.44371	1.54367	0.743924	0.743924	0.643955	0.444017	0.643955	0.444017	0.044142	0.24408	0.24408	0.444017	0.743924	1.1438	1.04383
EMR17008_20170718_PA10_05A	M		R	-0.188874	-0.188874	0.0691192	0.714102	-0.0598774	0.585105	0.198116	-0.446867	0.198116	0.327112	0.198116	-0.188874	-0.188874	-0.188874	-0.31787	0.198116	0.198116	0.327112	0.585105	0.0691192	0.0691192	0.198116	-0.0598774	0.327112	0.198116	0.585105	-0.0598774	-0.0598774	0.0691192	-0.0598774	0.0691192	0.327112	-0.188874	-0.0598774	-0.188874	0.0691192	0.327112	0.456109	0.585105	0.456109
EMR17008_20170718_PA10_05B	M	X	L	0.495752	0.833901	0.608469	1.17205	0.157604	0.721185	0.833901	0.721185	0.495752	1.28477	1.62291	0.608469	0.383036	0.721185	0.608469	0.157604	0.383036	1.17205	1.17205	1.05933	1.5102	0.833901	0.27032	0.608469	0.495752	0.0448875	0.0448875	0.0448875	0.0448875	0.0448875	-0.180545	0.383036	1.17205	0.383036	0.383036	0.383036	0.495752	0.721185	0.27032	0.946617
EMR17008_20170718_PA10_09A	M	X	R	0.293608	1.19429	-0.156732	0.593835	0.293608	0.593835	1.79474	1.04418	2.54531	1.79474	2.09497	1.19429	1.19429	0.593835	1.3444	0.593835	1.04418	0.894062	0.293608	0.143495	0.143495	0.293608	0.143495	0.293608	0.593835	0.443722	0.293608	-0.00661856	0.593835	0.593835	0.293608	0.593835	0.593835	0.593835	0.143495	-0.156732	-0.00661856	-0.156732	-0.306846	0.593835
EMR17008_20170718_PA10_09B	M	X	L	1.13019	1.13019	0.764933	1.49544	1.49544	1.49544	0.217054	-0.148198	1.31281	0.947559	0.582307	0.582307	0.217054	0.39968	1.13019	0.217054	0.39968	0.217054	1.31281	0.582307	0.217054	0.39968	0.217054	0.39968	0.582307	0.39968	0.217054	0.582307	0.217054	0.0344281	0.217054	0.217054	0.0344281	0.39968	0.217054	0.764933	0.0344281	0.0344281	0.582307	0.764933
EMR17008_20170718_PA10_11A	M		R	0.976501	0.34551	1.39716	0.13518	0.13518	0.76617	0.34551	-0.28548	0.34551	0.13518	0.34551	0.13518	-0.28548	-0.28548	-0.0751501	-0.28548	-0.0751501	-0.0751501	-0.28548	0.13518	0.13518	-0.28548	-0.0751501	0.13518	-0.28548	0.34551	-0.0751501	-0.0751501	-0.28548	-0.28548	0.13518	-0.0751501	0.13518	0.13518	-0.28548	0.34551	0.34551	0.55584	0.13518	0.13518
EMR17008_20170718_PA10_11B	M			0.644085	0.495819	0.347553	0.495819	0.0510205	0.347553	0.0510205	0.0510205	0.0510205	0.495819	-0.245512	-0.393778	0.0510205	-0.245512	-0.0972458	-0.393778	0.199287	-0.0972458	-0.0972458	0.347553	0.0510205	-0.245512	0.495819	-0.0972458	-0.0972458	-0.393778	-0.245512	-0.393778	-0.0972458	0.0510205	-0.0972458	-0.245512	0.199287	-0.0972458	0.347553	0.199287	-0.245512	0.644085	0.495819	0.0510205
EMR17008_20170718_PA10_11C	M	X	R	0.391485	0.0318353	0.0318353	-0.147989	-0.147989	0.0318353	0.391485	-0.147989	-0.147989	0.21166	-0.147989	0.0318353	0.391485	0.0318353	-0.147989	-0.147989	-0.147989	0.0318353	0.0318353	-0.147989	0.0318353	0.0318353	1.11078	0.0318353	-0.147989	0.21166	1.47043	0.391485	-0.147989	-0.147989	0.21166	0.21166	0.57131	0.930959	0.57131	0.21166	0.21166	0.21166	0.391485	-0.147989
EMR17008_20170718_PA10_17A	M		R	0.17288	0.17288	0.538091	0.17288	0.294617	0.903302	0.416354	0.903302	1.02504	1.75546	1.26851	1.39025	0.0511434	-0.192331	-0.0705936	-0.314068	-0.314068	-0.435804	-0.192331	-0.192331	-0.314068	0.538091	0.17288	0.416354	0.0511434	-0.192331	-0.0705936	-0.192331	-0.314068	-0.192331	-0.192331	-0.314068	0.0511434	-0.192331	-0.0705936	0.17288	0.416354	0.538091	1.14678	0.17288
EMR17008_20170718_PA10_17B	M		L	0.447038	0.905394	1.13457	0.561627	0.332449	0.21786	0.21786	0.103271	0.447038	0.332449	0.103271	0.676216	-0.584263	0.332449	-0.125907	-0.125907	-0.240496	0.103271	0.447038	0.332449	0.447038	0.103271	-0.0113178	-0.240496	-0.355085	-0.0113178	-0.0113178	-0.355085	-0.355085	0.103271	-0.240496	-0.125907	-0.0113178	0.332449	-0.0113178	-0.0113178	0.103271	0.561627	-0.355085	0.447038
EMR17008_20170718_PA10_19A	M	X	R	0.354714	0.282942	0.354714	0.426486	0.426486	0.57003	0.641802	0.139398	0.785346	1.43129	1.35952	0.426486	0.0676259	0.426486	0.354714	1.28775	1.07243	1.07243	0.426486	0.785346	1.21598	1.14421	0.641802	0.139398	0.21117	-0.00414616	0.713574	0.139398	0.0676259	0.0676259	0.426486	0.498258	0.0676259	-0.219462	0.139398	-0.50655	0.21117	0.21117	0.21117	0.139398
EMR17008_20170718_PA10_19B	M	X	R	0.501937	0.613839	0.390035	0.390035	0.0543279	0.278132	0.278132	0.613839	0.725741	-0.0575743	1.06145	0.837644	0.501937	0.613839	0.613839	0.390035	0.501937	-0.0575743	1.06145	-0.169477	0.0543279	-0.0575743	0.278132	-0.281379	-0.169477	0.16623	0.16623	-0.505183	0.16623	-0.617086	-0.169477	0.278132	-0.281379	-0.0575743	0.501937	-0.169477	0.0543279	0.501937	0.725741	0.725741
EMR17008_20170718_PA10_21A	M	X	L	0.0188508	-0.477773	-0.378448	0.0188508	0.0188508	0.41615	0.714124	1.11142	1.11142	1.90602	1.4094	0.614799	1.70737	0.714124	0.41615	0.614799	0.912773	1.0121	1.11142	0.912773	1.11142	0.614799	0.316825	0.0188508	0.118175	-0.279123	0.118175	0.0188508	-0.279123	-0.0804739	-0.179799	0.2175	-0.179799	-0.179799	-0.0804739	-0.279123	0.316825	0.316825	0.714124	0.614799
EMR17008_20170718_PA10_21B	M	X	L	0.223741	0.43424	0.43424	-0.197257	0.644739	-0.197257	0.0132422	0.0132422	0.118492	0.118492	2.53923	1.48674	1.17099	1.06574	1.38149	1.59198	1.17099	1.17099	1.06574	0.53949	0.960488	1.17099	0.43424	0.644739	0.43424	-0.197257	0.328991	0.223741	0.118492	0.43424	0.223741	0.328991	0.223741	0.328991	0.328991	0.223741	0.644739	1.06574	1.06574	0.43424
EMR17008_20170718_PA10_21C	M		R	0.533216	0.156688	0.533216	0.0625554	-0.0315767	-0.784634	-0.408105	-0.313973	-0.408105	-0.784634	-0.690502	-0.59637	-0.59637	-0.502237	-0.59637	-0.408105	-0.408105	-0.408105	-0.125709	-0.408105	-0.502237	-0.125709	-0.0315767	-0.313973	-0.219841	0.0625554	0.0625554	0.25082	0.25082	-0.0315767	-0.313973	-0.219841	-0.502237	-0.502237	-0.219841	-0.0315767	0.156688	-0.408105	-0.219841	-0.219841
EMR17008_20170718_PA10_21D	M		L	-0.301534	-0.643228	-0.187636	-0.187636	-0.415432	-0.52933	1.06524	-0.0737375	-0.415432	0.723549	-0.0737375	-0.187636	0.154059	0.495753	0.267957	-0.0737375	0.609651	0.0401607	-0.187636	0.723549	-0.187636	0.154059	0.495753	0.267957	1.17914	-0.187636	0.267957	0.267957	-0.0737375	-0.301534	0.381855	0.154059	0.381855	-0.301534	0.0401607	-0.0737375	-0.187636	-0.187636	0.267957	-0.0737375
EMR17008_20170718_PA10_21E	M		R	-0.0237707	0.0715197	0.16681	0.2621	-0.119061	-0.214351	-0.404932	-0.119061	-0.214351	-0.500222	-0.595513	-0.404932	-0.309642	-0.595513	-0.0237707	-0.595513	-0.309642	-0.214351	-0.214351	-0.0237707	-0.0237707	-0.214351	-0.119061	0.16681	-0.309642	-0.500222	-0.119061	0.0715197	-0.309642	-0.309642	0.2621	0.0715197	0.0715197	-0.404932	0.16681	0.0715197	0.0715197	-0.214351	-0.119061	0.357391
EMR17008_20170718_PA10_23A	M	X	L	0.98247	0.593659	1.06023	1.13799	0.904708	0.671421	0.515896	0.282609	0.593659	-0.572777	-0.728301	-0.495014	-0.806064	-0.728301	-0.650539	-0.495014	-0.33949	-0.417252	-0.183965	0.204847	0.204847	-0.0284402	0.204847	-0.0284402	-0.261727	-0.106203	-0.0284402	-0.261727	-0.33949	-0.33949	-0.806064	-0.417252	-0.33949	-0.261727	-0.183965	-0.183965	-0.33949	0.127084	-0.0284402	-0.183965
EMR17008_20170718_PA10_23B	M	X	L	0.632285	0.763983	1.02738	0.500587	0.303039	0.829832	0.961531	0.763983	1.42247	0.961531	-0.421301	-0.223754	0.303039	0.303039	0.171341	-0.223754	-0.0262062	-0.355452	-0.552999	-0.223754	-0.289603	0.0396429	-0.421301	-0.0920554	-0.289603	-0.223754	-0.48715	-0.355452	-0.289603	-0.552999	-0.882245	-0.0262062	-0.289603	0.0396429	-0.0920554	-0.223754	-0.421301	-0.223754	-0.0920554	0.171341
EMR17008_20170718_PA10_23C	M	X	L	0.552196	1.14375	0.337085	0.874861	1.41264	1.78908	1.68152	1.19753	1.19753	1.2513	0.982416	0.44464	0.175753	0.121975	-0.0931349	0.283308	0.121975	0.605973	0.552196	0.552196	0.874861	0.552196	1.19753	0.552196	1.14375	0.44464	0.498418	0.44464	0.0681977	-0.146912	0.44464	-0.0931349	0.0681977	0.874861	0.605973	0.175753	0.605973	0.605973	0.22953	0.821083
EMR17008_20170718_PA10_23D	M	X	L	0.329571	0.646801	0.170956	0.488186	0.408879	0.0123416	0.091649	-0.0669658	0.0123416	-0.54281	-0.146273	-0.225581	-0.701425	-0.225581	-0.701425	0.0123416	-0.146273	-0.0669658	0.091649	0.805416	0.646801	0.408879	0.0123416	0.329571	-0.0669658	-0.384195	0.091649	-0.225581	-0.384195	0.0123416	-0.225581	0.0123416	0.329571	0.329571	0.170956	0.488186	-0.225581	0.170956	0.0123416	0.091649
EMR17008_20170718_PA10_29A	M	X	L	-0.28503	-0.336817	-0.129668	-0.595753	-0.28503	-0.543966	-0.28503	-0.0778811	0.232842	0.129268	-0.0778811	0.595353	0.129268	0.232842	0.0256934	-0.129668	-0.0260939	-0.0260939	-0.181456	-0.492179	-0.0778811	-0.181456	-0.0778811	-0.129668	-0.388604	-0.336817	0.0256934	-0.129668	-0.0778811	-0.233243	0.0774806	0.0774806	0.181055	-0.0778811	0.181055	0.232842	0.491778	-0.0778811	-0.336817	0.543566
EMR17008_20170718_PA10_29B	M		R	0.56969	0.56969	0.56969	0.71344	-0.149059	0.138441	0.42594	-0.292809	-0.149059	-0.00530918	-0.149059	0.138441	-0.00530918	-0.292809	-0.292809	-0.292809	-0.292809	-0.436558	-0.436558	-0.436558	-0.292809	-0.292809	-0.00530918	-0.436558	-0.436558	-0.436558	-0.436558	-0.436558	-0.292809	-0.149059	-0.436558	-0.436558	-0.149059	-0.292809	-0.292809	-0.292809	-0.00530918	-0.436558	-0.436558	-0.436558
EMR17008_20170718_PA10_31A	M	X	R	-0.168991	0.529865	-0.168991	0.180437	-0.168991	-0.168991	-0.168991	0.529865	-0.168991	-0.168991	-0.168991	-0.168991	-0.168991	-0.168991	-0.168991	0.180437	-0.168991	-0.168991	0.180437	-0.168991	0.529865	0.180437	0.879293	0.180437	-0.168991	-0.168991	-0.168991	-0.168991	-0.168991	-0.168991	0.180437	0.180437	0.180437	0.529865	0.180437	0.180437	0.180437	0.180437	-0.168991	-0.168991

## Sheet: Propranolol Cue Right
ID	sex	SidePref	CUE	ZSCORE -1	-0.9	-0.8	-0.7	-0.6	-0.5	-0.4	-0.3	-0.2	-0.1	-1.38778e-16	0.1	0.2	0.3	0.4	0.5	0.6	0.7	0.8	0.9	1	1.1	1.2	1.3	1.4	1.5	1.6	1.7	1.8	1.9	2	2.1	2.2	2.3	2.4	2.5	2.6	2.7	2.8	2.9
CDH16002_20161103_PA10_01A	F		R	0.114522	0.114522	0.0717806	-0.0991852	0.285488	-0.0564438	0.0717806	-0.0991852	-0.141927	0.114522	-0.0991852	0.157263	0.114522	0.328229	0.456454	0.328229	0.499195	0.114522	0.328229	0.114522	0.798385	0.328229	0.413712	0.200005	0.0290391	0.285488	0.200005	0.0717806	0.456454	-0.184668	-0.0564438	-0.0137023	0.114522	-0.22741	0.285488	0.285488	-0.0137023	0.157263	0.285488	0.242746
CDH16002_20161103_PA10_17A	F		R	-0.136194	-0.25245	0.212574	0.0963178	0.0963178	-0.019938	-0.019938	0.445085	-0.019938	-0.136194	-0.136194	0.212574	0.212574	-0.019938	0.212574	-0.019938	0.0963178	-0.136194	-0.019938	-0.019938	-0.019938	0.212574	-0.136194	-0.136194	-0.136194	-0.136194	0.0963178	-0.136194	-0.136194	-0.136194	-0.019938	-0.136194	-0.136194	-0.136194	0.0963178	0.0963178	0.0963178	-0.019938	0.0963178	0.0963178
CDH16002_20161103_PA10_19A	F			-0.169283	-0.169283	-0.169283	-0.169283	-0.169283	-0.169283	-0.169283	-0.169283	-0.169283	-0.169283	-0.169283	-0.169283	-0.169283	-0.169283	-0.169283	-0.169283	-0.0353672	-0.169283	-0.169283	-0.169283	-0.169283	-0.169283	-0.169283	-0.169283	-0.169283	0.0985482	-0.0353672	0.500294	0.0985482	0.0985482	0.232464	0.232464	0.500294	0.366379	0.63421	0.366379	0.366379	-0.0353672	0.232464	0.232464
CDH16002_20161103_PA10_19B	F	X	R	-0.381926	-0.161154	-0.234745	-0.602697	-0.0875637	-0.455516	-0.492311	-0.418721	-0.455516	-0.34513	-0.161154	-0.197949	-0.381926	0.0596172	-0.161154	-0.0507685	-0.197949	0.0596172	-0.161154	-0.124359	-0.0875637	-0.0139732	0.022822	-0.234745	-0.381926	0.170003	-0.161154	-0.455516	-0.308335	-0.529107	-0.381926	-0.455516	-0.492311	-0.455516	-0.234745	-0.34513	-0.34513	-0.381926	-0.234745	-0.308335
CDH16002_20161103_PA10_19C	F		L	0.47257	0.171688	0.390512	-0.0471359	0.527276	0.718747	0.554629	0.2811	0.144335	-0.0197829	0.199041	0.089629	0.199041	-0.0744888	-0.0744888	0.116982	0.062276	-0.26596	-0.320665	-0.238607	-0.101842	0.062276	-0.0471359	0.308453	0.499923	0.2811	0.144335	0.199041	0.363159	0.00757007	-0.156548	-0.0744888	-0.348018	-0.0197829	0.199041	0.253747	0.527276	0.062276	0.363159	0.253747
CDH16003_20161102_PA10_01A	F	X	L	-0.292303	-0.399802	-0.399802	-0.399802	-0.543132	-0.435634	-0.399802	-0.435634	-0.292303	-0.328136	-0.292303	-0.328136	-0.292303	-0.220638	-0.399802	-0.184805	-0.148973	-0.435634	-0.328136	-0.435634	-0.292303	-0.220638	-0.11314	-0.399802	0.0301909	-0.399802	-0.363969	-0.292303	-0.184805	-0.0414745	-0.399802	-0.220638	-0.184805	-0.220638	-0.184805	-0.256471	-0.148973	-0.0414745	-0.11314	-0.220638
CDH16003_20161102_PA10_25A	F	X	L	0.191659	-0.0337973	0.0413548	0.191659	0.0413548	0.116507	-0.259254	-0.184101	-0.108949	-0.108949	-0.184101	0.191659	-0.184101	0.0413548	-0.108949	0.116507	-0.0337973	0.116507	-0.108949	0.116507	-0.184101	-0.0337973	0.191659	0.116507	0.417115	0.191659	0.341963	0.341963	0.116507	0.0413548	0.191659	0.191659	0.0413548	-0.0337973	0.191659	0.0413548	0.0413548	-0.0337973	-0.108949	0.0413548
CDH16005_20161107_PA10_05A	M	X	L	-0.15709	-0.0111758	-0.273822	0.0180072	-0.0111758	-0.303005	0.105556	0.368202	0.105556	0.309837	0.630849	0.689215	0.309837	0.776764	0.426568	0.251471	0.922678	0.426568	0.426568	0.484934	0.280654	0.368202	0.572483	0.163922	0.163922	-0.0987246	0.222288	0.309837	0.193105	-0.0111758	0.0471901	0.105556	0.193105	0.33902	-0.0111758	0.0763731	-0.0111758	0.426568	-0.215456	-0.0111758
CDH16005_20161107_PA10_07A	M	X	L	-0.216274	-0.10908	0.346491	-0.0822821	-0.10908	0.426886	0.694869	1.01645	1.07005	1.20404	0.855659	0.319693	0.185701	-0.00188714	-0.26987	-0.296669	-0.189475	-0.135879	-0.484257	-0.162677	-0.403862	-0.484257	-0.725442	-0.26987	-0.162677	-0.243072	-0.243072	0.292894	0.400088	0.239298	0.346491	0.292894	0.373289	0.694869	0.855659	0.641273	0.828861	0.962853	0.775264	0.828861
CDH16005_20161107_PA10_09A	M		L	0.0531914	-0.105378	-0.0525213	0.0531914	-0.0525213	0.106048	0.0531914	0.0531914	0.158904	0.264617	0.106048	-0.0525213	0.00033507	-0.158234	0.00033507	-0.263947	-0.158234	-0.263947	-0.316803	-0.105378	-0.21109	-0.105378	0.00033507	-0.0525213	0.106048	0.00033507	-0.21109	-0.105378	-0.0525213	-0.105378	0.106048	0.158904	0.106048	0.0531914	-0.158234	0.158904	0.264617	0.158904	0.158904	0.528899
CDH16005_20161107_PA10_09B	M		L	0.0954774	0.0436255	0.0436255	0.0436255	0.406589	0.665848	0.302885	-0.0600783	-0.0600783	0.354737	0.354737	-0.00822638	-0.0600783	0.147329	0.0954774	0.302885	-0.11193	-0.267486	0.354737	-0.215634	-0.163782	0.147329	0.0436255	-0.215634	-0.11193	-0.11193	0.0954774	0.0436255	-0.319338	0.0436255	0.199181	0.302885	0.251033	-0.00822638	0.302885	0.0436255	0.147329	-0.00822638	0.251033	0.0436255
CDH16005_20161107_PA10_13A	M	X	R	0.369857	0.139949	-0.0899577	0.293221	0.101632	0.101632	0.446492	0.293221	0.293221	0.446492	-0.166593	-0.0516398	-0.013322	0.101632	0.446492	-0.0899577	0.0249959	0.0249959	0.0633137	0.0633137	0.101632	0.101632	0.0633137	-0.281547	0.178267	0.216585	0.254903	-0.204911	-0.013322	-0.013322	-0.128276	-0.319865	-0.396501	-0.0899577	-0.128276	-0.396501	-0.013322	-0.204911	-0.358183	-0.0899577
CDH16005_20161107_PA10_15A	M		R	0.0779794	-0.273467	-0.0391692	0.0389299	-0.117268	-0.585863	-0.312516	0.0389299	-0.000119675	-0.195367	0.156079	-0.0782188	-0.000119675	-0.117268	-0.0782188	-0.000119675	0.0779794	0.195128	0.0779794	0.0389299	0.195128	0.273227	-0.117268	0.273227	0.351326	-0.000119675	0.0389299	-0.0391692	0.0389299	-0.0391692	-0.000119675	0.156079	-0.000119675	-0.195367	-0.546813	-0.000119675	-0.234417	-0.195367	-0.156318	-0.273467
CDH16005_20161107_PA10_21A	M	X	L	0.0494208	-0.194974	-0.286622	-0.256072	-0.469918	-0.469918	-0.561566	-0.500467	-0.164424	-0.194974	-0.256072	-0.317171	-0.194974	-0.225523	-0.439368	-0.34772	-0.317171	-0.317171	-0.194974	-0.225523	-0.225523	-0.531016	-0.408819	-0.164424	-0.34772	-0.469918	-0.34772	-0.469918	-0.34772	-0.317171	-0.225523	-0.0727765	-0.0422272	-0.34772	-0.225523	0.110519	-0.317171	-0.0422272	0.0188715	0.0188715
CDH16005_20161107_PA10_21B	M		R	-0.0626729	0.154107	-0.171063	-0.0626729	-0.225258	-0.225258	-0.171063	-0.279453	-0.387842	0.045717	0.045717	-0.225258	0.208302	-0.0626729	-0.333647	0.045717	0.045717	0.262497	0.154107	-0.171063	0.0999119	0.262497	0.262497	-0.00847795	-0.0626729	-0.171063	-0.116868	0.045717	0.0999119	-0.387842	-0.0626729	-0.116868	-0.116868	-0.225258	-0.225258	-0.171063	-0.279453	-0.333647	-0.116868	-0.225258
CDH16005_20161107_PA10_21C	M		L	0.412381	0.344518	0.140929	-0.198386	-0.130523	-0.130523	-0.266249	-0.266249	-0.198386	-0.266249	-0.130523	-0.130523	-0.130523	-0.0626602	-0.0626602	-0.0626602	0.00520283	0.00520283	-0.0626602	-0.130523	0.0730659	0.00520283	-0.0626602	-0.130523	-0.266249	0.00520283	-0.0626602	-0.130523	-0.0626602	-0.130523	-0.198386	-0.130523	-0.0626602	0.140929	0.00520283	-0.266249	-0.198386	-0.198386	0.140929	-0.198386
CDH16008_20161102_PA10_19A	M	X	R	0.466076	0.199696	0.4128	0.093144	0.039868	-0.066684	-0.11996	-0.013408	-0.11996	-0.013408	-0.013408	-0.173236	-0.013408	0.466076	0.785732	1.63815	1.85125	4.08884	4.19539	3.34298	2.91677	2.22418	2.01108	0.785732	1.31849	0.625904	0.4128	0.039868	0.093144	-0.066684	0.039868	0.199696	0.093144	0.199696	0.14642	-0.013408	-0.013408	0.199696	0.039868	-0.11996
CDH16010_20161104_PA10_01A	F		L	-0.113831	-0.113831	0.403132	-0.113831	0.273891	0.0154097	0.209271	0.209271	0.273891	0.08003	0.209271	0.338511	0.403132	0.209271	0.338511	-0.178451	0.14465	-0.178451	-0.0492107	0.209271	0.338511	0.403132	0.14465	0.467752	-0.0492107	0.338511	0.403132	0.403132	0.08003	0.209271	-0.113831	0.14465	0.0154097	0.273891	0.0154097	0.338511	0.532373	0.596993	-0.0492107	0.403132
CDH16010_20161104_PA10_01B	F	X	L	-0.0744005	-0.119388	-0.0294129	-0.164376	-0.164376	-0.119388	-0.254351	-0.0744005	-0.164376	-0.209363	-0.344326	-0.344326	-0.119388	-0.164376	-0.344326	-0.299339	-0.254351	-0.119388	-0.164376	0.0155748	-0.0294129	0.240513	0.0605624	-0.119388	0.0605624	0.0605624	0.0155748	-0.0744005	-0.209363	0.645402	0.285501	0.330488	0.330488	0.0155748	-0.0294129	-0.299339	0.0605624	0.555426	0.285501	-0.119388
CDH16010_20161104_PA10_01C	F		R	-0.0428392	-0.258758	-0.258758	-0.150798	-0.0428392	-0.150798	-0.150798	-0.258758	-0.258758	-0.258758	-0.150798	-0.258758	-0.0428392	0.0651201	-0.258758	-0.258758	0.0651201	-0.0428392	-0.150798	0.281039	-0.150798	-0.150798	-0.150798	-0.0428392	-0.150798	-0.0428392	0.0651201	-0.258758	0.0651201	-0.258758	0.0651201	-0.0428392	-0.150798	-0.0428392	-0.258758	0.173079	-0.258758	-0.0428392	-0.258758	0.0651201
CDH16010_20161104_PA10_05A	F		R	-0.200995	-0.365679	-0.159825	-0.365679	-0.324508	-0.40685	-0.365679	-0.324508	-0.44802	-0.44802	-0.324508	-0.40685	-0.324508	-0.365679	-0.365679	-0.44802	-0.365679	-0.489191	-0.242166	-0.44802	-0.365679	-0.489191	-0.283337	-0.283337	-0.365679	-0.118654	-0.0774829	-0.324508	-0.0363121	-0.242166	-0.200995	-0.242166	-0.0774829	-0.40685	-0.365679	-0.40685	-0.283337	-0.242166	-0.365679	-0.324508
CDH16010_20161104_PA10_05B	F		L	0.0189416	-0.0432993	0.143424	0.143424	-0.10554	0.0811826	0.143424	0.392387	0.143424	0.0189416	-0.10554	0.0811826	0.641351	0.330146	0.330146	0.143424	0.0189416	0.0189416	0.0811826	-0.0432993	0.143424	0.143424	0.143424	-0.0432993	-0.10554	0.0189416	0.0811826	-0.10554	0.330146	-0.0432993	0.0811826	-0.167781	-0.167781	0.0811826	0.0811826	0.0189416	-0.0432993	-0.0432993	-0.230022	-0.354504
CDH16010_20161104_PA10_05C	F	X	R	0.195678	0.101924	0.00816965	-0.0855847	0.148801	-0.319971	-0.0855847	-0.132462	-0.319971	0.101924	-0.319971	-0.0387075	-0.179339	-0.273093	-0.179339	-0.0855847	-0.132462	0.101924	-0.132462	0.148801	-0.132462	-0.179339	-0.0387075	-0.460602	-0.273093	0.00816965	-0.179339	0.242556	0.0550468	0.101924	0.00816965	0.148801	-0.0387075	0.101924	-0.0387075	-0.0855847	0.148801	-0.460602	0.0550468	-0.0387075
CDH16010_20161104_PA10_07A	F	X	R	0.14924	-0.0715537	0.0167638	0.325875	-0.336506	-0.115713	0.0167638	-0.424824	0.0609226	-0.248189	-0.248189	-0.292348	0.370034	0.458352	0.193399	0.414193	0.281717	0.414193	0.414193	0.193399	0.723304	0.237558	0.634987	0.281717	0.0609226	0.679146	0.325875	0.105081	0.0609226	-0.292348	0.370034	0.634987	0.325875	0.50251	0.723304	0.458352	0.679146	0.855781	0.634987	0.193399
CDH16010_20161104_PA10_07B	F	X	L	0.513194	0.579447	0.314437	0.115679	0.115679	0.446942	-0.149331	0.181932	0.314437	0.049427	-0.0168255	-0.149331	-0.149331	-0.281836	0.049427	0.115679	0.248184	0.579447	0.314437	0.181932	0.049427	0.248184	-0.149331	-0.0168255	0.181932	0.446942	-0.083078	0.314437	0.115679	0.115679	0.248184	-0.149331	-0.0168255	0.049427	0.115679	-0.0168255	0.314437	0.049427	0.314437	0.579447
CDH16010_20161104_PA10_11A	F		R	0.0707259	0.253778	0.143947	0.0341156	-0.0757154	0.217167	0.180557	0.51005	0.51005	0.253778	0.143947	0.802932	0.217167	0.729712	0.290388	0.51005	-0.0391051	-0.00249475	0.656491	0.363608	0.253778	0.290388	0.253778	0.253778	0.290388	0.107336	0.217167	0.400219	0.143947	-0.0757154	0.473439	0.180557	0.400219	-0.0391051	0.107336	0.0707259	0.0341156	0.0707259	-0.112326	-0.258767
CDH16010_20161104_PA10_13A	F	X	R	-0.172169	0.233993	0.386304	0.284763	-0.121399	0.386304	0.183223	0.233993	0.183223	0.233993	0.132453	0.335534	-0.0198581	0.132453	-0.0706284	-0.121399	0.437074	0.233993	0.538615	0.487844	0.0816824	-0.0198581	0.233993	0.386304	0.0816824	0.690926	0.233993	0.132453	0.690926	0.640155	0.640155	0.487844	0.487844	0.437074	0.183223	0.132453	0.233993	0.0309121	0.437074	0.132453
CDH16010_20161104_PA10_15A	F	X	R	0.196226	0.235548	0.117582	0.589444	-0.000383424	0.235548	0.392835	0.70741	0.156904	0.510801	0.0389384	0.314191	0.432157	0.156904	0.156904	0.432157	0.27487	0.0782603	0.392835	0.117582	0.510801	0.235548	0.156904	0.589444	0.235548	0.392835	0.0389384	-0.196993	-0.118349	-0.000383424	-0.000383424	0.353513	0.235548	-0.0397053	0.117582	0.353513	-0.000383424	-0.236315	-0.000383424	0.510801
CDH16010_20161104_PA10_15B	F	X	L	0.0935323	-0.470441	-0.0756597	-0.188454	-0.188454	-0.0192624	-0.244852	-0.132057	0.0935323	-0.0192624	0.713903	0.488314	0.0935323	0.037135	0.262724	-0.0756597	-0.244852	-0.0192624	-0.0192624	-0.0756597	-0.244852	-0.0192624	0.206327	-0.132057	-0.0192624	-0.244852	-0.132057	-0.301249	-0.188454	0.0935323	-0.188454	0.206327	-0.0756597	-0.0192624	-0.0756597	-0.0756597	0.0935323	0.375519	-0.357646	-0.132057
CDH16010_20161104_PA10_17A	F		R	0.701649	0.175765	0.340104	0.372972	0.83312	0.668781	0.83312	0.603046	0.898856	0.438707	0.504443	0.307236	0.307236	0.570178	0.340104	0.142898	0.340104	-0.0214409	0.142898	0.241501	0.11003	0.40584	0.241501	0.208633	0.0771623	-0.120044	0.142898	0.0442945	0.0771623	0.307236	0.274369	0.0442945	0.175765	0.142898	0.40584	0.274369	0.340104	0.340104	0.372972	0.438707
CDH16010_20161104_PA10_17B	F	X	R	-0.363032	-0.196179	-0.307414	-0.363032	-0.529886	-0.474268	-0.41865	-0.529886	-0.585504	-0.41865	-0.529886	-0.41865	-0.251797	-0.363032	-0.307414	-0.363032	-0.251797	-0.307414	-0.196179	-0.363032	-0.41865	-0.251797	-0.196179	-0.41865	-0.0849429	-0.41865	-0.0849429	-0.196179	-0.196179	-0.251797	-0.251797	-0.0849429	-0.196179	-0.251797	-0.029325	0.0262929	-0.029325	-0.196179	0.0262929	-0.251797
CDH16010_20161104_PA10_17C	F		R	-0.0863487	-0.0863487	-0.0277602	-0.379291	-0.0277602	-0.0863487	0.148005	0.148005	0.323771	-0.0277602	-0.379291	-0.144937	-0.0863487	-0.0277602	0.0894168	-0.0277602	-0.144937	0.148005	0.0308283	0.0894168	-0.379291	-0.262114	-0.379291	-0.144937	-0.320703	-0.0863487	0.0894168	-0.144937	0.0894168	-0.144937	-0.0277602	-0.203526	-0.203526	0.382359	0.0308283	-0.144937	-0.0277602	-0.203526	-0.320703	-0.0277602
CDH16010_20161104_PA10_21A	F	X	L	-0.103473	-0.103473	-0.298735	-0.16856	-0.0383861	0.221963	0.0917883	-0.233648	0.156876	-0.16856	0.0267011	-0.298735	-0.0383861	0.0917883	-0.298735	0.0267011	-0.0383861	-0.0383861	0.0917883	0.0917883	-0.298735	0.28705	0.0267011	0.0917883	-0.16856	-0.0383861	0.0917883	-0.233648	-0.103473	0.221963	-0.0383861	-0.0383861	0.156876	0.0917883	-0.103473	0.0267011	0.28705	-0.16856	0.352137	0.352137
CDH16010_20161104_PA10_21B	F		L	-0.186468	-0.068214	-0.304723	-0.265305	0.168295	0.0894585	0.0500404	0.0894585	0.0500404	-0.068214	-0.344141	0.0106223	-0.186468	-0.0287958	-0.344141	-0.265305	-0.14705	0.0894585	-0.068214	0.0500404	-0.14705	-0.14705	-0.0287958	0.0500404	-0.0287958	0.128877	0.0894585	-0.0287958	0.207713	0.128877	0.0500404	-0.107632	0.0106223	-0.225886	0.0500404	-0.107632	0.0894585	0.365385	0.0500404	0.128877
CDH16010_20161104_PA10_21C	F	X	L	0.367383	0.232163	0.232163	0.818117	0.232163	0.72797	0.277236	0.547677	0.45753	0.32231	-0.353792	-0.218572	-0.218572	0.0969423	0.0518689	0.142016	0.187089	0.187089	0.0969423	0.0969423	0.232163	0.00679547	0.32231	0.142016	0.277236	0.32231	0.412456	-0.218572	0.277236	-0.128425	0.32231	0.502603	0.0518689	0.187089	0.00679547	0.32231	0.32231	0.637824	0.00679547	0.277236
CDH16010_20161104_PA10_23A	F	X	L	-0.224224	0.104656	-0.0597839	-0.224224	-0.00497063	-0.00497063	-0.00497063	-0.279037	-0.279037	-0.224224	-0.33385	-0.388664	-0.16941	-0.33385	-0.0597839	-0.16941	-0.279037	0.214282	-0.00497063	-0.0597839	-0.0597839	-0.33385	-0.00497063	-0.0597839	0.0498426	0.433536	0.269096	-0.114597	0.543162	0.214282	0.378722	-0.00497063	-0.0597839	0.159469	0.159469	0.214282	0.104656	-0.16941	0.269096	0.0498426
CDH16010_20161104_PA10_23B	F	X	L	0.125725	0.259393	0.259393	0.225976	0.526727	0.0923086	0.526727	0.459893	0.49331	0.660394	1.72973	0.827478	0.693811	0.961145	0.626977	0.59356	0.459893	0.292809	0.292809	0.426476	0.159142	0.49331	0.459893	0.192559	0.159142	0.326226	0.225976	0.259393	0.326226	0.459893	0.0923086	0.660394	0.59356	0.626977	0.49331	0.727227	0.894311	0.292809	0.526727	0.827478
CDH16010_20161104_PA10_23C	F	X	L	-0.170954	-0.270664	-0.0712431	-0.121098	-0.121098	-0.0712431	0.178033	0.0284675	-0.0712431	0.227889	0.726442	0.128178	0.178033	-0.0712431	-0.270664	-0.0213878	-0.220809	-0.0213878	0.377455	0.0783228	0.327599	-0.220809	0.178033	-0.121098	0.277744	-0.0213878	-0.121098	0.327599	0.0284675	0.227889	-0.170954	0.0783228	0.227889	-0.0712431	0.128178	-0.42023	0.227889	0.178033	0.0783228	0.227889
CDH16010_20161104_PA10_23D	F		L	-0.193151	-0.0847746	-0.409904	-0.193151	-0.464092	-0.0847746	-0.0305863	-0.247339	-0.138963	-0.247339	-0.518281	-0.409904	-0.247339	-0.355716	0.0236019	-0.138963	-0.355716	-0.409904	-0.0305863	-0.138963	-0.193151	0.0236019	-0.355716	-0.247339	-0.193151	-0.247339	-0.0305863	-0.0847746	-0.0847746	0.0236019	-0.0305863	0.131978	0.40292	-0.138963	-0.409904	-0.247339	-0.409904	0.0777902	-0.193151	0.0236019
CDH16010_20161104_PA10_23E	F	X	L	-0.00264917	-0.161352	-0.161352	-0.372955	-0.267154	-0.214253	-0.372955	-0.108451	-0.00264917	-0.267154	-0.320054	-0.372955	-0.0555501	-0.161352	-0.320054	0.103153	-0.00264917	0.0502517	-0.320054	-0.108451	-0.108451	-0.00264917	0.367657	0.261855	0.156053	0.103153	0.314756	0.420558	0.0502517	0.737963	0.52636	0.685062	0.314756	0.314756	0.737963	0.685062	0.367657	0.52636	1.00247	0.790864
CDH16010_20161104_PA10_25A	F	X	L	-0.401154	-0.401154	-0.200342	-0.401154	-0.250545	-0.50156	-0.300748	-0.401154	-0.50156	-0.350951	-0.50156	-0.551763	-0.601966	-0.50156	-0.50156	-0.250545	-0.350951	-0.350951	-0.300748	-0.200342	-0.551763	-0.200342	-0.50156	-0.401154	-0.401154	-0.200342	-0.350951	-0.451357	-0.350951	-0.451357	-0.401154	-0.300748	-0.451357	-0.300748	-0.300748	-0.150139	-0.551763	-0.551763	-0.50156	-0.200342
CDH16010_20161104_PA10_25B	F		L	0.00379765	0.295011	0.537688	0.100869	-0.0447379	0.246475	0.246475	0.100869	0.246475	-0.190344	-0.287415	-0.141809	0.246475	0.0523331	0.100869	0.0523331	0.00379765	0.343546	0.343546	0.392082	0.343546	0.19794	0.537688	0.00379765	0.100869	0.149404	0.343546	0.537688	0.19794	0.392082	0.00379765	0.19794	0.19794	0.440617	0.489153	0.440617	0.489153	0.149404	0.489153	0.246475
CDH16010_20161104_PA10_25C	F		L	-0.122044	-0.0743315	-0.265182	-0.122044	-0.360608	-0.312895	-0.21747	-0.0743315	-0.40832	-0.40832	-0.503746	-0.360608	-0.169757	-0.265182	-0.0743315	-0.169757	-0.169757	-0.21747	-0.40832	-0.21747	-0.265182	-0.122044	-0.360608	0.0688065	-0.169757	-0.265182	-0.360608	-0.169757	-0.21747	0.116519	-0.0266189	-0.21747	-0.169757	-0.21747	0.164232	-0.40832	0.164232	-0.0266189	-0.0743315	0.164232
CDH16010_20161104_PA10_25D	F		L	-0.310515	-0.365785	-0.255245	-0.255245	-0.531595	-0.365785	-0.365785	-0.476325	-0.476325	-0.421055	-0.531595	-0.531595	-0.531595	-0.476325	-0.476325	-0.421055	-0.531595	-0.421055	-0.476325	-0.476325	-0.476325	-0.476325	-0.476325	-0.421055	-0.476325	-0.476325	-0.421055	-0.531595	-0.476325	-0.365785	-0.531595	-0.476325	-0.421055	-0.531595	-0.476325	-0.421055	-0.531595	-0.531595	-0.531595	-0.476325
CDH16010_20161104_PA10_27A	F	X	R	0.291825	0.258421	0.225017	0.291825	0.291825	0.559054	0.325228	0.492247	0.258421	0.692669	1.16032	0.926495	0.559054	0.559054	0.559054	0.42544	0.559054	0.42544	0.458843	0.559054	0.559054	0.659265	0.458843	0.225017	0.392036	0.659265	0.124806	0.191614	0.392036	0.057999	0.625862	0.358632	0.392036	0.492247	0.0914027	0.325228	0.0245953	0.15821	0.42544	-0.0088084
CDH16010_20161104_PA10_27B	F	X	L	0.0904302	0.437395	0.468937	0.626648	0.65819	0.973612	0.65819	0.752817	0.65819	0.815901	0.65819	0.626648	1.06824	0.721274	0.216599	0.216599	0.279683	0.185057	0.185057	0.279683	0.468937	0.153515	0.216599	0.37431	0.405852	0.342768	0.248141	0.185057	0.248141	0.37431	0.216599	0.216599	0.37431	-0.0357386	0.311226	0.248141	-0.0357386	-0.0357386	-0.00419642	0.500479
CDH16010_20161104_PA10_29A	F	X	R	0.142514	-0.401332	-0.317663	-0.275829	-0.443166	-0.443166	-0.359497	-0.317663	-0.652337	-0.568669	-0.652337	-0.317663	-0.485	-0.485	-0.526834	-0.526834	-0.401332	-0.443166	-0.317663	-0.401332	-0.443166	-0.275829	-0.359497	-0.108492	-0.19216	-0.19216	-0.359497	-0.485	-0.275829	-0.359497	-0.317663	-0.401332	-0.359497	-0.317663	-0.233994	-0.19216	-0.275829	-0.443166	-0.401332	-0.233994
CDH16010_20161104_PA10_29B	F		R	0.0982933	-0.0762808	0.0982933	-0.134472	-0.0762808	0.156485	-0.0762808	-0.192664	-0.192664	-0.192664	0.040102	-0.250855	0.040102	-0.0762808	-0.192664	-0.250855	-0.192664	-0.0762808	-0.134472	-0.192664	-0.192664	-0.0180894	0.0982933	-0.309046	-0.192664	-0.192664	0.0982933	-0.134472	0.040102	-0.0762808	-0.250855	-0.134472	-0.134472	-0.0762808	-0.0762808	-0.0180894	-0.134472	-0.250855	-0.250855	0.040102
CDH16010_20161104_PA10_29C	F	X	L	-0.230019	0.119007	-0.0904083	0.0492021	0.188812	0.0492021	-0.160213	0.119007	0.0492021	-0.0904083	-0.369629	-0.0904083	-0.0206031	-0.0904083	-0.299824	-0.299824	-0.369629	-0.230019	0.0492021	-0.230019	0.0492021	-0.0206031	-0.160213	-0.0904083	-0.0904083	0.258618	0.119007	0.258618	-0.160213	0.0492021	-0.0206031	-0.230019	0.0492021	-0.160213	-0.0904083	0.258618	0.258618	-0.230019	-0.0206031	0.0492021
CDH16019_20161109_PA10_01A	M		R	0.168864	0.500107	0.582918	1.12119	0.955566	1.16259	0.996971	1.12119	0.541512	0.872755	0.665728	0.168864	0.127459	0.251675	-0.0795681	0.0860533	0.00324263	-0.0381627	0.251675	-0.0381627	0.168864	0.168864	-0.120973	-0.162379	0.00324263	0.0860533	0.168864	0.044648	-0.203784	0.044648	-0.369406	-0.203784	-0.203784	-0.0795681	0.210269	0.00324263	-0.0795681	0.00324263	0.168864	-0.0381627
CDH16019_20161109_PA10_03A	M	X	L	-0.349712	-0.395672	-0.395672	-0.441632	-0.257792	-0.349712	-0.257792	0.0179676	0.0639275	0.247767	-0.119912	0.0179676	-0.165872	-0.119912	-0.0739524	-0.395672	-0.395672	-0.165872	-0.395672	-0.303752	-0.257792	-0.211832	-0.441632	-0.441632	-0.349712	-0.395672	-0.257792	-0.349712	-0.211832	-0.257792	-0.0739524	-0.303752	-0.395672	-0.303752	0.0179676	0.109887	-0.0739524	-0.257792	-0.0279924	0.0179676
CDH16019_20161109_PA10_05A	M	X	R	0.792061	1.23658	1.02914	1.38475	1.08841	1.08841	0.643888	0.347542	0.199368	-0.00807426	-0.541498	-0.482229	-0.422959	-0.393325	-0.274786	-0.334055	-0.185882	0.140099	-0.274786	-0.0673436	-0.0673436	0.46608	0.52535	0.762427	0.495715	0.554984	0.52535	0.9106	0.495715	1.14768	0.673523	0.821696	0.9106	0.880965	1.05877	1.26622	1.38475	1.35512	1.32549	0.940235
CDH16019_20161109_PA10_09A	M	X	R	0.0667972	-0.261081	-0.0151725	0.148767	0.312706	-0.0971421	-0.343051	0.476645	0.312706	0.312706	-0.179112	-0.0151725	-0.0971421	-0.261081	-0.179112	0.0667972	-0.261081	-0.261081	-0.0971421	0.0667972	-0.179112	0.148767	-0.179112	-0.261081	-0.179112	-0.425021	-0.0971421	-0.179112	0.0667972	0.0667972	0.148767	0.0667972	0.0667972	-0.0151725	0.640585	-0.0971421	0.312706	0.230736	0.148767	0.0667972
CDH16019_20161109_PA10_17A	M		R	0.478142	0.876532	1.6164	1.27492	0.364316	0.421229	0.364316	0.307403	0.136664	0.25049	0.0797516	-0.0340743	0.0797516	0.421229	0.421229	0.478142	0.193577	0.25049	0.0228386	0.0228386	0.193577	-0.1479	0.25049	0.0228386	-0.0340743	0.591968	0.421229	0.478142	0.478142	0.364316	0.421229	0.478142	0.307403	0.25049	0.307403	-0.0909872	0.25049	0.0797516	0.307403	0.136664
CDH16019_20161109_PA10_21A	M		R	0.049653	0.049653	-0.0931936	0.335346	-0.0931936	-0.0931936	0.478193	-0.23604	-0.23604	0.1925	-0.23604	0.1925	0.62104	0.049653	-0.0931936	0.049653	-0.0931936	-0.0931936	-0.0931936	-0.23604	-0.0931936	0.049653	-0.23604	0.049653	0.1925	0.1925	-0.23604	-0.23604	-0.23604	0.049653	-0.0931936	-0.23604	-0.0931936	0.1925	0.049653	0.049653	-0.0931936	-0.0931936	0.62104	0.1925
EMR17002_20170707_PA10_01A	F	X	L	0.194406	-0.21056	0.0594176	0.464383	-0.075571	0.329395	-0.21056	0.869349	-0.21056	0.194406	0.329395	0.194406	0.464383	0.329395	0.599372	0.329395	0.0594176	-0.075571	0.329395	0.329395	0.0594176	0.194406	0.0594176	0.599372	0.0594176	0.194406	0.464383	0.194406	0.599372	0.464383	-0.480537	0.329395	-0.345548	0.329395	-0.345548	0.194406	0.0594176	-0.075571	0.194406	0.0594176
EMR17002_20170707_PA10_03A	F		R	0.0410456	-0.356346	-0.15765	-0.356346	0.0410456	-0.15765	-0.15765	0.239741	0.0410456	-0.356346	0.0410456	0.239741	0.0410456	0.239741	0.438437	-0.15765	-0.356346	-0.15765	-0.15765	0.0410456	0.239741	-0.15765	0.239741	-0.356346	-0.356346	-0.15765	0.438437	-0.356346	-0.15765	-0.15765	0.0410456	-0.15765	0.239741	-0.356346	0.0410456	-0.15765	-0.356346	-0.15765	0.438437	-0.15765
EMR17002_20170707_PA10_05A	F	X	R	1.13837	1.13837	0.676032	1.23084	0.676032	0.583564	0.583564	0.121224	-0.0637127	0.30616	-0.0637127	0.213692	0.491096	0.491096	0.491096	-0.0637127	0.0287555	0.121224	0.213692	0.121224	-0.156181	0.121224	0.0287555	0.121224	0.30616	0.7685	0.398628	0.213692	0.213692	0.491096	0.583564	0.30616	0.676032	0.213692	0.953437	1.0459	0.860968	0.860968	0.491096	0.676032
EMR17002_20170707_PA10_07A	F		L	-0.110558	-0.0224589	-0.0665083	0.329936	0.06564	0.373986	0.0215905	0.418035	0.06564	-0.198656	-0.198656	0.506134	0.506134	0.506134	0.418035	0.329936	-0.242706	0.285887	-0.418903	-0.286755	0.506134	-0.154607	0.462085	-0.286755	-0.198656	0.197788	-0.242706	-0.0224589	0.241838	0.506134	-0.198656	0.594233	0.682332	0.329936	0.109689	0.06564	0.109689	0.06564	-0.418903	0.0215905
EMR17002_20170707_PA10_09A	F		R	0.328923	0.18502	0.904538	0.0411161	1.04844	1.04844	0.904538	0.328923	0.18502	1.33625	0.472827	0.472827	0.472827	0.18502	0.616731	0.18502	0.18502	1.04844	0.472827	0.18502	0.18502	0.18502	0.328923	0.0411161	0.472827	0.0411161	0.616731	0.472827	-0.102787	0.616731	-0.102787	0.18502	0.18502	0.18502	0.0411161	-0.246691	0.472827	0.328923	-0.102787	-0.102787
EMR17002_20170707_PA10_09B	F		L	-0.206916	-0.206916	-0.35627	-0.206916	-0.206916	-0.0575624	-0.35627	-0.35627	-0.35627	-0.206916	-0.505624	-0.206916	-0.35627	-0.505624	-0.35627	-0.505624	-0.505624	-0.206916	-0.505624	-0.206916	-0.505624	-0.206916	-0.35627	-0.206916	-0.505624	-0.505624	-0.505624	-0.206916	-0.206916	-0.35627	-0.505624	-0.206916	-0.35627	-0.35627	-0.505624	-0.206916	-0.505624	-0.35627	-0.35627	-0.505624
EMR17002_20170707_PA10_11A	F		L	0.75451	-0.083328	0.335591	-0.669814	0.251807	0.335591	0.000455756	0.0842395	0.586942	0.586942	0.251807	0.670726	0.419375	0.503158	0.335591	0.168023	0.922077	0.503158	0.419375	0.168023	0.922077	0.586942	0.503158	0.75451	0.75451	0.922077	0.586942	-0.083328	0.251807	0.75451	0.670726	0.335591	0.251807	0.503158	0.75451	0.503158	0.000455756	0.335591	0.75451	0.335591
EMR17002_20170707_PA10_13A	F		L	-0.0900712	0.352348	0.131139	-0.311281	-0.0900712	-0.0900712	0.352348	0.131139	0.131139	0.352348	0.131139	-0.311281	0.573558	0.573558	0.131139	0.131139	0.131139	0.131139	0.794768	-0.0900712	0.131139	0.131139	-0.0900712	-0.311281	-0.311281	0.794768	0.573558	-0.311281	-0.0900712	0.131139	0.131139	0.352348	-0.0900712	0.352348	0.131139	0.131139	-0.0900712	-0.0900712	0.131139	0.131139
EMR17002_20170707_PA10_19A	F		R	-0.0806633	-0.419906	0.258579	0.258579	0.0889579	-0.0806633	-0.0806633	0.0889579	0.0889579	-0.0806633	-0.0806633	-0.250284	0.0889579	-0.250284	-0.0806633	0.597821	0.4282	0.0889579	0.0889579	0.0889579	-0.250284	-0.250284	-0.0806633	-0.0806633	0.258579	-0.0806633	-0.250284	0.0889579	-0.250284	0.258579	0.0889579	0.597821	0.0889579	0.258579	-0.250284	0.0889579	-0.0806633	0.4282	-0.0806633	0.767442
EMR17002_20170707_PA10_21A	F		R	-0.191267	-0.191267	0.180728	-0.191267	0.180728	-0.191267	0.180728	-0.191267	0.552723	0.180728	-0.191267	0.180728	0.180728	0.924718	-0.191267	-0.191267	-0.191267	-0.191267	-0.191267	-0.191267	-0.191267	-0.191267	-0.191267	-0.191267	0.180728	-0.191267	-0.191267	-0.191267	-0.191267	0.180728	0.180728	-0.191267	-0.191267	0.180728	0.180728	-0.191267	-0.191267	-0.191267	0.180728	0.552723
EMR17002_20170707_PA10_23A	F		R	-0.26353	0.60453	0.821545	0.387515	0.387515	0.1705	0.0619922	0.713037	1.03856	-0.0465153	0.713037	-0.0465153	0.279007	0.387515	0.279007	0.1705	-0.26353	0.0619922	0.279007	0.1705	-0.0465153	-0.0465153	0.713037	0.0619922	0.1705	-0.155023	-0.26353	0.0619922	-0.26353	-0.0465153	0.496022	-0.155023	0.496022	-0.480545	0.1705	-0.0465153	0.0619922	-0.155023	0.60453	0.821545
EMR17002_20170707_PA10_23B	F	X	L	0.303895	-0.100024	0.707814	0.101935	-0.301984	0.909773	0.909773	0.303895	0.707814	-0.100024	0.909773	0.707814	-0.100024	0.101935	0.707814	0.505854	0.505854	1.71761	0.505854	0.707814	0.505854	0.101935	0.707814	1.11173	0.505854	0.707814	0.303895	0.707814	0.303895	0.707814	0.303895	0.303895	0.303895	0.101935	0.505854	0.303895	-0.100024	0.505854	0.303895	0.101935
EMR17002_20170707_PA10_27A	F			0.258045	-0.167444	-0.167444	0.258045	0.683534	-0.167444	0.258045	1.10902	-0.167444	-0.167444	0.258045	-0.167444	-0.167444	-0.167444	0.258045	-0.167444	-0.167444	-0.167444	0.683534	-0.167444	0.258045	-0.167444	-0.167444	-0.167444	-0.167444	0.258045	-0.167444	-0.167444	-0.167444	-0.167444	-0.167444	0.683534	-0.167444	0.683534	-0.167444	0.258045	0.683534	-0.167444	-0.167444	-0.167444
EMR17002_20170707_PA10_31A	F	X	L	0.501535	-0.0112345	0.75792	-0.0112345	0.24515	0.24515	-0.0112345	0.75792	0.24515	0.501535	0.501535	-0.0112345	0.501535	-0.267619	0.24515	-0.0112345	-0.267619	0.24515	-0.0112345	0.501535	-0.0112345	-0.267619	-0.0112345	0.24515	-0.0112345	0.501535	-0.0112345	-0.0112345	0.24515	1.27069	-0.0112345	-0.0112345	-0.0112345	0.501535	-0.0112345	0.24515	1.0143	-0.0112345	-0.267619	-0.0112345
EMR17002_20170707_PA10_31B	F		L	-0.222238	-0.222238	-0.00333512	-0.222238	-0.222238	-0.222238	-0.222238	-0.222238	-0.222238	-0.222238	-0.222238	-0.222238	-0.222238	-0.222238	-0.222238	-0.222238	-0.222238	-0.222238	-0.00333512	-0.00333512	-0.222238	-0.222238	-0.00333512	-0.00333512	-0.00333512	-0.222238	-0.00333512	-0.00333512	-0.00333512	-0.222238	-0.222238	-0.222238	-0.222238	-0.222238	-0.222238	-0.222238	-0.00333512	-0.222238	-0.222238	0.215568
EMR17004_20170703_PA10_03A	F			-0.216291	-0.216291	-0.216291	-0.216291	-0.216291	-0.216291	-0.216291	-0.216291	-0.216291	-0.216291	-0.216291	-0.216291	-0.216291	-0.216291	-0.216291	-0.216291	-0.216291	-0.216291	-0.216291	-0.216291	-0.216291	-0.216291	-0.216291	-0.216291	-0.216291	-0.216291	-0.216291	-0.216291	-0.216291	-0.216291	-0.216291	-0.216291	-0.216291	0.0176887	-0.216291	-0.216291	-0.216291	-0.216291	-0.216291	-0.216291
EMR17004_20170703_PA10_03B	F		R	-0.107979	-0.292189	0.0762305	-0.476398	0.0762305	-0.292189	0.0762305	-0.476398	-0.476398	-0.292189	0.0762305	-0.107979	-0.292189	-0.476398	-0.476398	-0.107979	-0.107979	-0.476398	-0.292189	-0.107979	-0.107979	-0.107979	-0.107979	-0.292189	-0.292189	-0.107979	0.0762305	-0.292189	0.26044	-0.107979	0.26044	-0.107979	0.26044	-0.292189	-0.107979	0.44465	-0.476398	0.44465	-0.292189	0.26044
EMR17004_20170703_PA10_11A	F		R	0.026462	-0.254385	0.026462	0.026462	-0.254385	0.026462	-0.254385	-0.254385	-0.254385	-0.254385	0.588156	-0.254385	0.026462	0.026462	-0.254385	0.307309	0.026462	-0.254385	-0.254385	0.307309	0.026462	-0.254385	0.026462	0.026462	0.026462	0.026462	0.307309	-0.254385	-0.254385	-0.254385	0.307309	-0.254385	0.588156	0.307309	0.307309	0.026462	0.588156	1.4307	0.026462	-0.254385
EMR17004_20170703_PA10_11B	F		R	-0.244186	0.0195859	-0.244186	0.151472	-0.244186	0.0195859	0.0195859	-0.376071	0.0195859	0.0195859	-0.244186	-0.376071	-0.376071	-0.507957	-0.1123	-0.507957	0.283357	-0.639843	-0.1123	-0.244186	-0.507957	-0.1123	-0.376071	-0.376071	-0.1123	0.151472	-0.244186	-0.376071	-0.376071	0.151472	-0.1123	-0.376071	0.0195859	-0.1123	-0.244186	-0.1123	-0.1123	-0.244186	-0.244186	-0.244186
EMR17004_20170703_PA10_13A	F		L	-0.377439	-0.17663	0.626603	0.224986	0.0241778	-0.17663	-0.17663	0.224986	-0.377439	0.0241778	-0.17663	-0.17663	0.0241778	0.0241778	0.224986	0.0241778	0.0241778	0.425794	-0.377439	-0.377439	-0.377439	0.425794	0.0241778	0.0241778	-0.17663	0.224986	0.626603	0.626603	-0.17663	-0.377439	-0.377439	-0.17663	-0.17663	-0.377439	-0.377439	-0.17663	-0.17663	-0.17663	-0.17663	0.0241778
EMR17004_20170703_PA10_17A	F	X	R	0.0950019	0.469355	0.469355	0.469355	-0.279351	0.0950019	0.0950019	-0.279351	-0.279351	0.0950019	-0.0921745	-0.0921745	0.0950019	-0.279351	-0.0921745	-0.279351	-0.279351	0.0950019	-0.279351	-0.279351	0.282178	-0.0921745	0.469355	0.0950019	0.282178	0.282178	-0.466527	0.843708	0.282178	-0.466527	-0.279351	0.282178	0.0950019	-0.279351	0.282178	-0.279351	0.469355	1.03088	0.0950019	0.0950019
EMR17004_20170703_PA10_17B	F		L	-0.33553	-0.114861	-0.114861	-0.114861	0.105808	-0.114861	0.105808	-0.114861	-0.114861	0.105808	0.326478	-0.114861	0.105808	-0.33553	-0.114861	-0.33553	-0.114861	0.105808	0.105808	-0.33553	0.326478	-0.33553	-0.114861	0.105808	-0.33553	-0.114861	0.326478	0.105808	0.988486	-0.114861	0.547147	0.326478	0.547147	0.105808	0.105808	0.105808	-0.33553	-0.33553	-0.114861	-0.33553
EMR17006_20170717_PA10_01A	M	X	L	-0.172728	-0.172728	-0.172728	0.292367	-0.172728	-0.172728	-0.172728	-0.172728	-0.172728	0.292367	-0.172728	-0.172728	-0.172728	0.0598197	0.292367	0.292367	0.0598197	0.0598197	0.292367	0.0598197	0.292367	-0.172728	0.0598197	0.292367	0.292367	0.292367	-0.172728	0.0598197	-0.172728	-0.172728	-0.172728	0.99001	0.0598197	0.292367	-0.172728	-0.172728	-0.172728	0.0598197	-0.172728	-0.172728
EMR17006_20170717_PA10_03A	M		R	-0.444472	-0.444472	-0.444472	-0.350324	-0.444472	-0.444472	-0.444472	-0.444472	-0.444472	-0.444472	-0.350324	-0.444472	-0.350324	-0.444472	-0.444472	-0.444472	-0.444472	-0.444472	-0.444472	-0.444472	-0.350324	-0.444472	-0.444472	-0.444472	-0.444472	-0.350324	-0.350324	-0.444472	-0.444472	-0.350324	-0.256177	-0.350324	-0.444472	-0.350324	-0.350324	-0.444472	-0.444472	-0.350324	-0.350324	-0.350324
EMR17006_20170717_PA10_03B	M		L	-0.100332	-0.214016	-0.100332	-0.100332	-0.100332	-0.214016	0.0133525	0.127037	-0.214016	0.0133525	-0.100332	0.127037	0.0133525	0.240721	-0.214016	-0.327701	0.0133525	-0.327701	-0.100332	-0.100332	0.240721	-0.214016	-0.100332	-0.327701	-0.214016	-0.214016	-0.214016	-0.327701	-0.327701	0.127037	-0.214016	-0.100332	-0.214016	-0.214016	0.0133525	-0.100332	0.0133525	-0.327701	-0.214016	0.127037
EMR17006_20170717_PA10_05A	M		L	-0.357181	-0.357181	-0.357181	-0.0832712	-0.288703	-0.151749	-0.0832712	-0.220226	-0.357181	-0.151749	-0.0832712	-0.357181	-0.494136	-0.357181	-0.425658	-0.357181	-0.425658	-0.288703	-0.425658	-0.425658	-0.425658	-0.220226	-0.425658	-0.494136	-0.357181	-0.357181	-0.494136	-0.494136	-0.357181	-0.425658	-0.357181	-0.288703	-0.357181	-0.425658	-0.425658	-0.288703	-0.357181	-0.288703	-0.220226	-0.151749
EMR17006_20170717_PA10_07A	M	X	R	0.0175095	-0.190501	0.0175095	-0.190501	-0.190501	0.0175095	0.0175095	-0.190501	-0.190501	0.433531	0.0175095	-0.190501	0.0175095	-0.190501	0.22552	0.0175095	0.0175095	0.0175095	0.849553	0.433531	0.22552	0.0175095	0.433531	0.22552	1.05756	0.0175095	0.433531	0.0175095	0.0175095	0.433531	0.433531	0.0175095	-0.190501	-0.190501	0.0175095	0.0175095	0.433531	0.0175095	0.0175095	0.22552
EMR17006_20170717_PA10_09A	M	X	R	0.644396	0.895297	0.895297	0.811663	0.560763	0.72803	0.477129	0.477129	0.477129	0.309862	0.477129	0.560763	0.644396	0.477129	0.644396	0.644396	0.72803	1.56436	0.895297	1.1462	1.3971	1.48073	1.98253	2.1498	1.8989	2.73523	1.81526	1.81526	2.23343	1.648	1.98253	1.8989	1.1462	1.48073	1.648	0.97893	1.1462	0.895297	1.31346	0.72803
EMR17006_20170717_PA10_09B	M	X	R	0.929603	0.331155	0.331155	0.031931	0.031931	-0.117681	0.031931	-0.267293	-0.117681	-0.117681	-0.117681	-0.117681	0.031931	0.331155	-0.267293	0.181543	0.031931	0.031931	0.181543	0.480767	0.331155	0.331155	0.181543	-0.117681	0.331155	0.480767	0.331155	1.52805	0.929603	0.630379	1.22883	1.07921	1.52805	0.480767	0.779991	1.07921	0.779991	0.331155	0.480767	0.630379
EMR17006_20170717_PA10_11A	M		R	-0.188536	-0.188536	-0.188536	-0.188536	-0.188536	-0.188536	-0.0592889	-0.0592889	-0.188536	0.328454	0.0699586	0.328454	0.199206	0.457701	0.199206	-0.188536	-0.0592889	-0.188536	-0.188536	-0.188536	-0.188536	-0.188536	-0.188536	-0.188536	-0.0592889	0.328454	-0.0592889	-0.188536	-0.0592889	-0.0592889	-0.0592889	-0.0592889	-0.188536	0.0699586	-0.188536	-0.188536	-0.188536	-0.188536	-0.188536	-0.188536
EMR17006_20170717_PA10_11B	M		L	-0.57066	-0.238867	-0.437943	-0.57066	-0.437943	-0.504301	-0.57066	-0.57066	-0.57066	-0.504301	-0.637019	-0.637019	-0.57066	-0.504301	-0.57066	-0.637019	-0.637019	-0.637019	-0.57066	-0.637019	-0.637019	-0.637019	-0.57066	-0.637019	-0.637019	-0.57066	-0.504301	-0.504301	-0.57066	-0.637019	-0.57066	-0.637019	-0.57066	-0.437943	-0.637019	-0.637019	-0.504301	-0.637019	-0.504301	-0.637019
EMR17006_20170717_PA10_11C	M	X	R	-0.478541	-0.412468	-0.412468	-0.280323	-0.280323	-0.21425	-0.412468	-0.21425	-0.280323	-0.280323	-0.148177	-0.346395	-0.0821048	0.644694	0.77684	0.644694	0.512549	0.380404	0.380404	0.116113	-0.148177	-0.478541	-0.544613	-0.412468	-0.412468	-0.478541	-0.148177	-0.280323	-0.280323	-0.21425	-0.346395	-0.21425	-0.346395	-0.280323	-0.544613	-0.346395	-0.544613	-0.280323	-0.346395	-0.346395
EMR17006_20170717_PA10_11D	M	X	R	0.777265	0.553789	0.740019	0.702773	1.07523	1.00074	1.29871	2.08088	2.3416	2.67682	2.67682	2.86305	3.19826	2.75131	2.45334	2.26711	1.55943	1.29871	0.814512	0.44205	0.479296	0.330312	0.181327	0.479296	0.330312	0.106835	0.293066	-0.116642	0.0323428	0.181327	-0.116642	-0.116642	-0.191134	-0.00490337	0.0695889	-0.0793956	0.404804	0.516542	0.777265	1.3732
EMR17006_20170717_PA10_13A	M			0.792096	1.69653	1.99801	1.24432	0.792096	0.339876	-0.112344	-0.112344	-0.263084	-0.338454	-0.263084	-0.187714	-0.338454	-0.338454	0.264506	0.0383961	-0.0369738	-0.263084	-0.338454	-0.187714	-0.0369738	-0.0369738	-0.0369738	-0.187714	-0.338454	-0.338454	-0.187714	-0.112344	-0.0369738	0.0383961	0.264506	0.189136	0.113766	-0.0369738	0.189136	-0.263084	-0.0369738	0.113766	-0.0369738	-0.112344
EMR17006_20170717_PA10_15A	M	X	L	0.411261	-0.143408	-0.143408	0.346006	-0.0128979	0.672282	0.933303	0.900676	1.1617	1.06381	0.868048	0.868048	0.900676	0.215495	0.182868	0.607027	0.443889	0.0197297	-0.0455256	0.0849849	0.280751	0.770165	0.607027	0.509144	0.70491	0.574399	1.06381	0.70491	0.672282	0.607027	0.215495	0.117613	0.15024	0.411261	0.411261	0.509144	0.346006	0.0523573	0.476517	0.443889
EMR17006_20170717_PA10_15B	M	X	R	-0.208301	-0.267181	-0.443821	-0.502701	-0.443821	-0.384941	-0.326061	-0.326061	-0.326061	-0.267181	-0.267181	-0.0905412	-0.149421	-0.384941	-0.0905412	-0.443821	-0.267181	-0.443821	-0.443821	-0.326061	-0.443821	-0.561581	-0.149421	-0.502701	-0.326061	0.0272188	0.0860989	-0.149421	-0.208301	0.144979	-0.208301	-0.326061	-0.208301	-0.267181	-0.502701	-0.267181	-0.620461	-0.502701	-0.208301	-0.326061
EMR17006_20170717_PA10_15C	M	X	L	-0.292034	-0.205526	-0.724575	-0.421796	-0.421796	-0.638067	-0.854338	-0.811084	-0.767829	-0.767829	-0.335288	-0.508305	-0.508305	-0.767829	-0.508305	-0.638067	-0.638067	-0.508305	-0.594813	-0.335288	-0.292034	-0.292034	-0.292034	-0.205526	-0.335288	-0.465051	0.0972531	-0.24878	-0.421796	-0.335288	-0.335288	-0.465051	-0.465051	-0.681321	-0.335288	-0.421796	-0.594813	-0.508305	-0.724575	-0.594813
EMR17006_20170717_PA10_17A	M	X	L	-0.226749	-0.0472823	-0.0472823	0.491118	0.221918	0.132184	-0.0472823	-0.137016	0.0424511	0.311651	-0.226749	-0.226749	0.0424511	0.0424511	-0.0472823	-0.226749	0.0424511	0.401384	0.401384	0.401384	0.311651	0.221918	0.221918	0.132184	0.760318	0.311651	0.132184	0.132184	0.401384	0.401384	0.670585	0.401384	0.0424511	0.221918	0.132184	0.132184	0.401384	-0.226749	-0.137016	-0.226749
EMR17006_20170717_PA10_17B	M		R	0.484995	0.127214	-0.0516766	0.484995	-0.0516766	-0.0516766	0.306104	-0.0516766	0.127214	-0.0516766	0.127214	-0.0516766	0.127214	-0.230567	-0.0516766	0.127214	0.306104	0.127214	0.484995	0.306104	0.306104	-0.230567	-0.230567	0.127214	-0.230567	0.127214	-0.0516766	-0.0516766	-0.230567	0.306104	0.127214	-0.0516766	-0.230567	0.306104	-0.0516766	-0.230567	-0.230567	-0.230567	0.306104	0.127214
EMR17006_20170717_PA10_19A	M	X	L	-0.317235	-0.559484	-0.478735	-0.559484	-0.559484	-0.519109	-0.559484	-0.559484	-0.519109	-0.559484	-0.559484	-0.559484	-0.559484	-0.519109	-0.559484	-0.559484	-0.559484	-0.519109	-0.43836	-0.559484	-0.35761	-0.43836	-0.397985	-0.27686	-0.43836	-0.317235	-0.519109	-0.478735	-0.397985	-0.397985	-0.35761	-0.478735	-0.519109	-0.519109	-0.559484	-0.519109	-0.559484	-0.43836	-0.519109	-0.478735
EMR17006_20170717_PA10_19B	M	X	R	0.654538	1.00491	0.654538	1.88083	-0.0461975	1.18009	1.00491	1.00491	0.30417	1.35527	0.128986	-0.0461975	0.654538	0.30417	0.30417	-0.221381	0.479354	1.00491	0.654538	0.829722	1.00491	-0.0461975	0.479354	0.128986	0.30417	0.654538	-0.0461975	-0.0461975	-0.0461975	1.18009	0.128986	0.30417	0.30417	0.30417	-0.221381	0.30417	0.30417	0.30417	0.479354	0.479354
EMR17006_20170717_PA10_23A	M		R	-0.256307	-0.613004	-0.454472	-0.414839	-0.692271	-0.573371	-0.731904	-0.414839	-0.692271	-0.335573	-0.533738	-0.652638	-0.494105	-0.137408	-0.177041	-0.414839	-0.29594	-0.137408	-0.533738	-0.137408	-0.256307	-0.375206	-0.29594	-0.454472	-0.414839	-0.335573	-0.177041	-0.454472	-0.335573	-0.414839	-0.256307	-0.375206	-0.256307	-0.256307	-0.216674	-0.652638	-0.414839	-0.375206	-0.414839	-0.375206
EMR17006_20170717_PA10_25A	M	X	L	0.327995	1.26258	1.02893	1.72987	1.14575	1.84669	1.61304	2.31398	1.84669	3.24856	5.11772	2.19716	1.61304	1.61304	0.0943498	-0.0224727	0.0943498	0.327995	0.0943498	0.327995	0.211172	0.211172	0.211172	0.0943498	-0.256118	-0.139295	-0.139295	-0.139295	-0.0224727	-0.0224727	0.327995	-0.0224727	-0.256118	-0.139295	-0.0224727	-0.139295	-0.256118	0.211172	0.327995	0.0943498
EMR17006_20170717_PA10_27A	M	X	L	-0.479712	-0.260367	-0.589384	-0.772172	-0.589384	-0.845286	-0.808729	-0.662499	-0.772172	-0.333482	-0.735614	-0.699057	-0.552827	-0.552827	-0.772172	-0.516269	-0.479712	-0.625942	-0.772172	-0.552827	-0.735614	-0.845286	-0.735614	-0.772172	-0.808729	-0.881844	-0.918401	-0.808729	-0.881844	-0.772172	-0.808729	-0.845286	-0.699057	-0.881844	-0.772172	-0.662499	-0.735614	-0.808729	-0.772172	-0.735614
EMR17006_20170717_PA10_27B	M		R	-0.135875	-0.135875	0.210524	-0.135875	-0.135875	-0.135875	-0.135875	-0.135875	-0.135875	-0.135875	-0.135875	-0.135875	-0.135875	-0.135875	-0.135875	0.0373248	0.0373248	0.0373248	-0.135875	0.210524	-0.135875	0.0373248	-0.135875	-0.135875	-0.135875	-0.135875	-0.135875	-0.135875	-0.135875	-0.135875	-0.135875	-0.135875	-0.135875	0.0373248	-0.135875	-0.135875	-0.135875	-0.135875	-0.135875	0.0373248
EMR17007_20170622_PA10_01A	M	X	R	0.602455	0.54823	0.385555	0.87358	0.43978	0.33133	0.168654	0.54823	0.54823	0.277105	0.927805	0.22288	0.65668	0.114429	0.22288	0.114429	0.277105	0.114429	0.43978	0.277105	0.33133	0.33133	0.114429	-0.319371	0.494005	0.00597933	-0.156696	0.00597933	-0.156696	-0.265146	-0.156696	-0.0482457	0.385555	-0.102471	0.168654	-0.210921	0.0602044	0.385555	0.168654	0.0602044
EMR17007_20170622_PA10_03A	M	X	L	-0.00835604	-0.470177	-0.10072	-0.0545381	-0.470177	-0.516359	-0.423995	-0.377813	-0.377813	-0.239266	-0.470177	-0.516359	-0.239266	-0.470177	-0.33163	-0.193084	-0.423995	-0.608723	-0.470177	-0.33163	-0.562541	-0.33163	-0.193084	-0.516359	-0.562541	-0.00835604	-0.193084	-0.193084	-0.239266	-0.377813	-0.193084	-0.516359	-0.470177	-0.239266	-0.470177	-0.377813	-0.470177	-0.33163	-0.470177	-0.239266
EMR17007_20170622_PA10_03B	M	X	R	0.0979485	0.253952	0.0199468	0.253952	0.487957	0.0199468	0.409955	-0.0580549	-0.0580549	0.0199468	-0.0580549	0.0199468	0.487957	0.331954	0.0199468	-0.214058	-0.0580549	-0.214058	-0.214058	0.0199468	-0.448064	0.0979485	-0.448064	-0.370062	-0.0580549	-0.370062	-0.448064	-0.214058	-0.0580549	-0.370062	-0.448064	-0.0580549	-0.214058	-0.136057	0.253952	0.253952	0.253952	-0.214058	0.487957	0.253952
EMR17007_20170622_PA10_05A	M		L	-0.320281	0.191105	-0.149819	0.0206429	-0.23505	-0.149819	-0.405513	-0.0645882	-0.0645882	-0.23505	-0.23505	-0.23505	-0.149819	-0.405513	-0.23505	-0.0645882	-0.23505	-0.23505	0.191105	-0.320281	-0.23505	0.0206429	-0.320281	0.105874	-0.0645882	-0.0645882	-0.320281	-0.149819	0.0206429	-0.0645882	-0.149819	0.787723	0.0206429	0.0206429	-0.149819	-0.23505	0.105874	-0.149819	-0.23505	-0.320281
EMR17007_20170622_PA10_05B	M		R	-0.0409528	-0.0409528	0.0680988	-0.150004	-0.150004	0.0680988	-0.0409528	0.0680988	0.0680988	0.17715	0.17715	0.17715	0.504305	0.286202	-0.0409528	0.0680988	0.0680988	-0.259056	0.17715	0.0680988	-0.150004	-0.0409528	-0.0409528	0.0680988	-0.150004	-0.150004	0.0680988	-0.259056	-0.150004	-0.150004	-0.150004	0.17715	-0.368108	-0.0409528	0.0680988	-0.0409528	-0.150004	-0.0409528	0.0680988	0.286202
EMR17007_20170622_PA10_07A	M		R	0.884051	1.62717	1.04919	1.09047	1.17304	1.91616	1.13176	1.46203	0.512493	0.512493	0.471209	-0.065486	0.223504	-0.189339	-0.0242017	0.140935	-0.354475	-0.189339	-0.10677	-0.39576	-0.10677	-0.10677	-0.10677	-0.271907	-0.437044	-0.230623	-0.148054	0.553777	0.471209	0.0583667	0.140935	0.223504	0.0170825	-0.065486	0.884051	0.471209	0.429925	0.760198	0.223504	0.38864
EMR17007_20170622_PA10_09A	M	X	L	0.183162	-0.0626141	-0.0977249	-0.378611	-0.0275033	0.253383	0.815156	0.11294	0.148051	0.0427183	0.0427183	-0.0275033	-0.238168	0.183162	-0.273279	0.148051	0.00760751	0.148051	0.148051	0.218272	0.218272	0.569381	0.218272	0.569381	0.639602	0.323605	0.253383	0.148051	0.00760751	0.11294	-0.0275033	0.183162	0.0427183	0.358716	0.323605	0.218272	0.00760751	0.569381	0.00760751	0.183162
EMR17007_20170622_PA10_09B	M	X	R	0.0337526	0.0772931	0.0337526	0.164374	0.425617	0.382076	0.207914	0.469157	0.382076	0.120834	0.643319	0.512698	0.904562	0.338536	0.338536	0.207914	0.904562	0.469157	0.294995	0.164374	0.0337526	-0.18395	-0.140409	-0.18395	-0.271031	-0.314571	-0.140409	-0.18395	-0.22749	-0.00978786	-0.00978786	0.164374	-0.271031	0.0337526	-0.0968688	-0.22749	0.643319	0.0337526	-0.00978786	0.120834
EMR17007_20170622_PA10_11A	M		L	0.397081	-0.0177403	0.258807	0.0513965	-0.0868771	0.0513965	0.742765	0.18967	0.18967	0.604491	-0.225151	-0.225151	-0.225151	-0.225151	-0.225151	0.18967	-0.225151	-0.156014	0.327944	0.0513965	-0.0177403	0.18967	0.0513965	0.258807	0.0513965	-0.0868771	0.0513965	-0.156014	0.0513965	0.258807	0.18967	0.0513965	0.327944	0.258807	0.258807	0.327944	0.18967	0.673628	0.742765	0.466217
EMR17007_20170622_PA10_11B	M	X	R	0.352003	0.0861912	0.192516	0.192516	0.989951	0.936788	0.883626	0.617814	0.617814	0.352003	0.0861912	0.245678	-0.232783	0.192516	-0.0732958	-0.0732958	-0.0732958	0.245678	0.51149	0.670977	0.29884	0.458327	0.724139	0.29884	0.0330289	0.192516	-0.0201334	-0.126458	-0.0732958	0.0861912	-0.126458	0.245678	0.139354	0.139354	0.405165	0.458327	0.405165	0.458327	0.724139	0.883626
EMR17007_20170622_PA10_17A	M		L	0.128681	0.128681	0.128681	-0.237134	0.220134	0.951763	0.403041	0.220134	-0.14568	-0.237134	0.220134	-0.237134	-0.14568	-0.237134	-0.237134	-0.328587	0.0372271	-0.0542264	-0.0542264	-0.0542264	-0.0542264	-0.14568	0.0372271	-0.0542264	-0.14568	0.128681	0.128681	0.0372271	0.128681	0.128681	0.494495	0.677402	0.403041	0.0372271	0.128681	-0.0542264	-0.0542264	0.128681	-0.0542264	0.220134
EMR17007_20170622_PA10_17B	M		R	-0.247466	-0.13742	0.0826738	0.302767	0.412814	0.0826738	-0.13742	0.412814	0.0826738	1.07309	0.302767	0.0826738	-0.0273729	-0.13742	0.0826738	-0.13742	-0.0273729	-0.13742	0.302767	0.192721	-0.247466	-0.13742	-0.0273729	-0.13742	0.0826738	-0.0273729	0.0826738	-0.0273729	0.0826738	-0.0273729	0.302767	0.0826738	0.0826738	0.302767	0.192721	0.0826738	-0.0273729	-0.13742	0.0826738	0.192721
EMR17007_20170622_PA10_23A	M	X	L	-0.354857	-0.294971	-0.205141	0.0344046	0.333837	-0.0254818	0.0942911	0.154178	-0.175198	0.0344046	-0.115312	0.393723	0.0643478	-0.0254818	0.0942911	0.0344046	-0.0254818	0.513496	0.184121	0.303894	0.36378	0.54344	0.573383	0.483553	0.27395	-0.0853683	0.0344046	0.00446139	-0.175198	-0.205141	-0.0853683	0.214064	-0.384801	0.0643478	-0.384801	0.0344046	0.0344046	0.00446139	-0.145255	0.0344046
EMR17007_20170622_PA10_23B	M	X	R	-0.237568	-0.142142	-0.142142	0.0487101	-0.0467161	0.0487101	0.144136	-0.142142	-0.237568	-0.0467161	-0.0467161	0.239562	0.144136	0.0487101	0.239562	-0.0467161	0.430415	0.430415	0.239562	0.144136	-0.0467161	0.0487101	0.144136	0.334988	0.144136	0.0487101	-0.237568	-0.237568	-0.237568	0.525841	0.144136	0.239562	0.0487101	0.144136	-0.0467161	-0.142142	0.239562	0.239562	0.144136	0.0487101
EMR17007_20170622_PA10_27A	M	X	L	0.194887	-0.0672631	0.0638119	-0.0672631	0.325962	0.260424	0.260424	-0.0672631	-0.198338	0.129349	-0.263875	-0.0672631	-0.132801	0.0638119	0.194887	0.0638119	0.194887	-0.329413	0.194887	-0.198338	-0.00172559	-0.263875	-0.0672631	-0.00172559	-0.329413	0.129349	-0.132801	-0.329413	0.0638119	-0.0672631	0.0638119	-0.132801	0.457037	0.129349	-0.00172559	-0.0672631	0.0638119	-0.00172559	0.129349	-0.329413
EMR17007_20170622_PA10_27B	M	X	R	0.465861	0.894101	1.13881	1.38352	0.955278	1.4447	0.404684	1.38352	0.771747	0.282329	0.588215	-0.0235567	-0.0235567	0.282329	0.404684	-0.268265	0.465861	0.0987977	0.221152	0.771747	0.404684	0.221152	0.221152	0.221152	0.221152	0.0987977	0.0987977	-0.0235567	0.282329	0.0376205	0.404684	0.159975	0.0987977	0.343506	0.588215	0.71057	0.404684	0.527038	1.19999	0.527038
EMR17007_20170622_PA10_27C	M	X	R	-0.0437301	0.13781	-0.1345	0.410121	0.319351	-0.0437301	0.228581	-0.1345	-0.1345	0.228581	0.13781	0.13781	0.319351	0.228581	0.0470402	-0.0437301	0.0470402	-0.1345	0.228581	0.500891	0.0470402	0.319351	-0.0437301	0.682432	0.228581	-0.225271	-0.0437301	-0.1345	0.0470402	0.0470402	0.13781	0.500891	0.13781	0.410121	0.13781	0.13781	0.500891	0.319351	0.319351	0.13781
EMR17008_20170718_PA10_01A	M		L	-0.0150457	-0.118861	-0.0150457	0.192585	-0.222677	-0.118861	0.192585	-0.0150457	0.296401	1.02311	0.504032	0.504032	0.919294	0.400216	-0.534123	0.607847	0.711663	0.400216	0.607847	-0.118861	0.192585	-0.222677	0.296401	0.0887698	0.400216	0.0887698	-0.222677	-0.0150457	-0.118861	-0.222677	-0.0150457	-0.222677	0.296401	-0.326492	0.296401	-0.0150457	-0.118861	-0.326492	0.607847	-0.222677
EMR17008_20170718_PA10_03A	M	X	L	0.044142	-0.0558268	-0.0558268	-0.0558268	0.144111	0.24408	0.24408	-0.155796	-0.255764	0.743924	-0.0558268	0.743924	1.1438	1.04383	1.44371	1.64364	0.943861	2.14349	1.64364	1.04383	1.24377	1.84358	1.1438	1.34374	0.943861	0.344049	1.1438	0.843893	0.643955	0.543986	0.943861	1.04383	0.24408	0.843893	0.843893	0.344049	0.643955	0.044142	0.444017	0.344049
EMR17008_20170718_PA10_05A	M		R	0.327112	0.585105	0.456109	0.0691192	0.456109	0.843098	0.714102	0.456109	0.456109	0.198116	0.0691192	0.714102	0.327112	-0.0598774	-0.0598774	-0.188874	-0.0598774	0.198116	0.0691192	0.456109	-0.446867	-0.188874	0.0691192	0.327112	0.327112	0.198116	0.585105	0.0691192	0.0691192	-0.188874	-0.0598774	-0.188874	0.0691192	-0.0598774	-0.31787	-0.188874	-0.188874	-0.188874	-0.188874	-0.0598774
EMR17008_20170718_PA10_05B	M	X	L	1.05933	0.383036	0.383036	0.495752	0.721185	0.383036	0.608469	0.383036	0.946617	0.27032	0.495752	0.27032	1.28477	0.495752	0.0448875	0.608469	0.27032	0.495752	0.27032	0.608469	1.05933	0.833901	0.27032	0.495752	0.383036	0.27032	0.157604	-0.0678287	0.157604	0.157604	-0.180545	-0.405977	0.157604	0.495752	0.27032	0.383036	0.608469	1.05933	0.495752	0.27032
EMR17008_20170718_PA10_09A	M	X	R	0.593835	0.443722	-0.00661856	0.443722	-0.306846	0.593835	0.443722	0.894062	0.743949	2.24508	2.84554	1.94486	1.19429	1.49452	1.04418	1.3444	0.894062	0.143495	0.894062	0.743949	-0.00661856	0.443722	-0.00661856	0.293608	-0.156732	-0.00661856	-0.00661856	1.19429	-0.00661856	-0.156732	0.143495	-0.156732	0.143495	0.143495	0.293608	-0.156732	-0.00661856	0.743949	0.743949	-0.00661856
EMR17008_20170718_PA10_09B	M	X	L	-0.148198	0.764933	1.67806	0.947559	1.31281	1.13019	0.582307	0.764933	0.582307	0.947559	0.0344281	1.13019	0.39968	0.39968	0.582307	0.39968	0.0344281	0.947559	0.582307	0.217054	0.0344281	0.582307	0.0344281	0.0344281	0.0344281	0.39968	0.217054	0.0344281	0.582307	0.0344281	0.0344281	0.582307	0.0344281	0.764933	0.764933	0.217054	1.31281	1.31281	0.39968	0.947559
EMR17008_20170718_PA10_11A	M		R	0.34551	0.976501	0.34551	0.34551	-0.0751501	-0.0751501	0.34551	0.34551	0.34551	0.13518	0.76617	0.34551	-0.0751501	-0.28548	-0.0751501	0.34551	-0.28548	-0.28548	-0.0751501	-0.28548	-0.0751501	0.55584	-0.0751501	0.13518	-0.0751501	0.13518	-0.0751501	-0.0751501	0.55584	-0.0751501	-0.0751501	-0.28548	-0.0751501	0.13518	0.55584	-0.0751501	0.55584	-0.28548	0.76617	0.13518
EMR17008_20170718_PA10_11B	M			0.347553	0.495819	0.495819	0.495819	-0.245512	0.199287	-0.0972458	0.0510205	0.0510205	0.644085	-0.0972458	-0.245512	-0.245512	-0.245512	-0.245512	0.0510205	0.0510205	0.0510205	-0.245512	0.199287	-0.0972458	-0.245512	-0.245512	-0.0972458	-0.0972458	-0.245512	0.199287	-0.393778	0.199287	-0.245512	-0.245512	-0.393778	0.199287	0.0510205	0.495819	0.0510205	0.0510205	0.0510205	0.495819	0.495819
EMR17008_20170718_PA10_11C	M	X	R	0.57131	0.391485	0.0318353	0.21166	-0.147989	0.21166	-0.147989	0.0318353	-0.147989	0.0318353	0.0318353	0.391485	1.11078	0.391485	0.57131	0.21166	1.29061	1.11078	2.36956	3.26868	3.98798	2.90903	1.47043	1.29061	2.18973	1.11078	0.0318353	-0.147989	0.21166	0.57131	1.29061	0.0318353	0.57131	-0.147989	-0.147989	-0.147989	0.57131	-0.147989	-0.147989	-0.147989
EMR17008_20170718_PA10_17A	M		R	0.294617	0.781565	0.538091	0.294617	0.903302	0.416354	0.416354	0.416354	1.02504	0.781565	1.02504	0.17288	0.294617	-0.0705936	0.17288	0.0511434	-0.0705936	0.416354	0.17288	0.538091	-0.0705936	0.17288	0.0511434	0.17288	0.416354	0.0511434	0.17288	-0.314068	-0.192331	-0.0705936	-0.0705936	-0.314068	-0.314068	-0.314068	0.0511434	0.294617	-0.0705936	-0.314068	0.903302	0.294617
EMR17008_20170718_PA10_17B	M		L	0.332449	-0.0113178	-0.0113178	-0.0113178	0.21786	-0.0113178	-0.125907	-0.0113178	0.103271	0.447038	-0.0113178	-0.240496	-0.0113178	-0.469674	0.332449	0.103271	0.103271	-0.125907	-0.125907	0.103271	-0.0113178	0.103271	-0.355085	-0.240496	-0.240496	-0.125907	-0.355085	-0.240496	0.21786	-0.240496	0.332449	0.103271	0.332449	0.332449	0.332449	-0.125907	-0.0113178	0.332449	0.332449	0.21786
EMR17008_20170718_PA10_19A	M	X	R	0.139398	0.139398	0.713574	0.713574	0.21117	0.785346	0.92889	1.00066	1.21598	0.641802	1.57484	1.14421	1.21598	0.785346	0.785346	1.64661	0.785346	0.354714	0.713574	1.07243	0.92889	0.92889	0.713574	0.713574	-0.0759182	0.426486	0.0676259	0.354714	0.0676259	0.0676259	-0.0759182	-0.00414616	-0.363006	0.282942	0.0676259	0.0676259	-0.00414616	-0.363006	-0.14769	-0.219462
EMR17008_20170718_PA10_19B	M	X	R	0.725741	0.278132	0.278132	0.278132	0.613839	0.725741	-0.0575743	0.725741	0.0543279	0.949546	0.949546	1.73286	0.390035	0.278132	0.613839	0.278132	1.06145	0.725741	-0.169477	0.390035	0.501937	0.278132	-0.281379	0.390035	0.16623	0.16623	-0.505183	0.278132	0.16623	0.390035	0.16623	0.16623	0.390035	0.16623	0.390035	0.278132	-0.0575743	0.613839	0.0543279	-0.281379
EMR17008_20170718_PA10_21A	M	X	L	0.41615	0.118175	0.515474	0.0188508	-0.0804739	0.0188508	0.118175	0.515474	0.41615	0.41615	0.316825	0.813448	0.912773	0.813448	0.714124	0.714124	0.0188508	1.11142	-0.0804739	0.316825	-0.0804739	-0.0804739	-0.279123	-0.279123	-0.279123	-0.279123	-0.0804739	-0.279123	-0.477773	0.0188508	0.41615	0.0188508	0.41615	-0.477773	-0.0804739	-0.179799	0.0188508	0.2175	0.316825	0.118175
EMR17008_20170718_PA10_21B	M	X	L	0.223741	0.0132422	0.0132422	-0.0920073	0.223741	0.118492	0.43424	0.43424	-0.302506	1.06574	1.59198	1.48674	0.749989	0.749989	0.53949	1.27624	0.53949	0.644739	1.17099	1.17099	1.06574	0.644739	0.328991	0.118492	0.0132422	-0.0920073	-0.197257	0.43424	-0.197257	-0.407756	-0.302506	0.0132422	0.328991	0.223741	0.118492	-0.0920073	0.749989	0.0132422	0.43424	-0.197257
EMR17008_20170718_PA10_21C	M		R	-0.502237	-0.0315767	0.0625554	0.0625554	-0.313973	-0.219841	-0.408105	0.0625554	-0.502237	-0.408105	-0.59637	-0.408105	-0.59637	-0.59637	-0.502237	-0.408105	0.0625554	-0.502237	-0.502237	-0.502237	-0.219841	-0.0315767	-0.125709	-0.219841	-0.219841	-0.313973	-0.0315767	0.0625554	-0.0315767	0.156688	0.156688	0.156688	0.533216	0.344952	0.344952	0.72148	-0.219841	0.344952	0.0625554	-0.408105
EMR17008_20170718_PA10_21D	M		L	0.723549	-0.52933	-0.301534	-0.187636	-0.52933	-0.187636	-0.301534	-0.415432	0.154059	0.381855	-0.415432	-0.0737375	-0.0737375	0.381855	0.154059	0.495753	0.381855	-0.0737375	-0.187636	0.0401607	-0.0737375	0.495753	0.0401607	0.609651	0.267957	0.267957	0.267957	-0.187636	0.0401607	0.495753	-0.0737375	0.154059	-0.0737375	-0.0737375	-0.0737375	-0.301534	-0.415432	-0.0737375	-0.0737375	0.0401607
EMR17008_20170718_PA10_21E	M		R	-0.309642	0.0715197	-0.0237707	-0.119061	-0.0237707	0.0715197	-0.0237707	-0.0237707	-0.214351	-0.0237707	-0.309642	-0.0237707	-0.500222	-0.0237707	-0.119061	-0.309642	-0.119061	-0.119061	-0.309642	-0.214351	-0.214351	-0.309642	-0.0237707	0.2621	0.0715197	-0.119061	0.16681	-0.690803	-0.214351	-0.214351	-0.404932	-0.309642	0.16681	-0.0237707	-0.214351	0.0715197	-0.214351	0.452681	0.547971	0.16681
EMR17008_20170718_PA10_23A	M	X	L	1.06023	0.593659	0.98247	0.749183	1.29352	0.98247	0.0493221	0.438134	-0.0284402	-0.495014	-0.33949	-0.417252	-0.728301	-0.650539	-0.495014	-0.806064	-0.572777	-0.495014	-0.728301	-0.495014	-0.33949	-0.650539	-0.650539	-0.183965	-0.806064	-0.572777	-0.728301	-0.806064	-0.33949	-0.417252	-0.572777	0.127084	-0.106203	-0.33949	0.282609	0.438134	0.438134	1.44904	0.749183	0.360372
EMR17008_20170718_PA10_23B	M	X	L	-0.157904	0.105492	0.105492	0.698134	0.23719	1.15908	1.22493	1.29078	0.961531	0.698134	0.171341	0.368888	0.171341	-0.355452	0.0396429	-0.355452	-0.157904	-0.552999	-0.684697	-0.223754	-0.289603	-0.223754	-0.48715	-0.48715	-0.552999	-0.552999	-0.684697	-0.552999	-0.48715	-0.552999	-0.552999	-0.684697	-0.552999	-0.157904	-0.355452	-0.157904	0.0396429	0.171341	-0.157904	0.434738
EMR17008_20170718_PA10_23C	M	X	L	0.928638	0.713528	0.767306	1.46641	1.30508	0.713528	0.928638	0.767306	1.52019	1.35886	0.283308	0.605973	0.175753	0.44464	0.175753	0.874861	0.283308	0.390863	0.283308	0.0144202	0.121975	0.982416	0.22953	0.121975	0.337085	0.498418	0.0144202	0.0681977	-0.146912	-0.362023	-0.308245	-0.0393573	0.22953	-0.0393573	0.283308	0.283308	0.390863	1.2513	0.498418	0.713528
EMR17008_20170718_PA10_23D	M	X	L	-0.146273	0.0123416	0.250264	0.96403	0.091649	0.884723	0.091649	0.170956	0.091649	-0.0669658	-0.304888	-0.146273	-0.225581	-0.0669658	-0.225581	0.0123416	-0.146273	-0.463503	-0.225581	-0.225581	0.0123416	-0.0669658	-0.463503	-0.54281	0.170956	-0.225581	-0.463503	-0.225581	-0.225581	-0.304888	-0.463503	0.091649	-0.225581	-0.463503	0.408879	-0.225581	0.0123416	0.0123416	-0.225581	0.170956
EMR17008_20170718_PA10_29A	M	X	L	-0.440392	-0.543966	-0.28503	-0.440392	0.0256934	-0.336817	0.0256934	0.0256934	-0.0260939	-0.129668	-0.181456	-0.0778811	0.0774806	-0.233243	-0.0778811	-0.181456	-0.233243	-0.0778811	0.0256934	0.439991	-0.0778811	-0.0778811	0.129268	0.0774806	0.0774806	-0.492179	-0.181456	0.129268	-0.233243	-0.181456	-0.233243	0.181055	-0.129668	-0.181456	0.0774806	0.388204	0.439991	0.439991	-0.0260939	0.232842
EMR17008_20170718_PA10_29B	M		R	0.56969	0.28219	0.42594	1.14469	0.138441	0.138441	0.71344	0.857189	0.71344	0.857189	0.42594	0.857189	-0.00530918	-0.292809	-0.00530918	-0.149059	-0.292809	-0.292809	-0.292809	-0.436558	-0.292809	-0.292809	-0.292809	-0.292809	-0.149059	-0.149059	-0.292809	-0.00530918	-0.436558	-0.436558	-0.436558	-0.00530918	-0.149059	0.28219	0.138441	-0.436558	-0.149059	-0.00530918	-0.292809	-0.436558
EMR17008_20170718_PA10_31A	M	X	R	0.180437	0.180437	-0.168991	0.180437	-0.168991	-0.168991	0.180437	-0.168991	-0.168991	-0.168991	0.180437	-0.168991	0.180437	-0.168991	0.180437	0.180437	-0.168991	0.180437	0.529865	0.879293	0.879293	0.529865	0.879293	0.879293	-0.168991	0.529865	-0.168991	0.879293	0.180437	0.180437	-0.168991	0.529865	0.180437	0.529865	0.180437	-0.168991	0.529865	0.879293	-0.168991	-0.168991
