# Supplementary material for: Sex-dependent noradrenergic modulation of premotor cortex during decision-making
Source: eLife. 2023 Aug 22;12:e85590. doi: 10.7554/eLife.85590 (PMC10471161; doi:10.7554/eLife.85590)
Supplement: Figure 4—source data 1. [file elife-85590-fig4-data1.xlsx]

## Sheet: WellExit histogram
	Fig 4B	Inset Histogram		Fig 4C	Inset Histogram		Fig 4D	Inset Histogram		Fig 4E	Inset Histogram
		Well Exit			Well Exit			Well Exit			Well Exit
		-4.62205			-4.85502			-6.83043			-4.98402
		-4.35102			-4.33558			-5.86435			-4.78003
		-4.30003			-4.24805			-3.86648			-4.3842
		-4.25135			-4.15305			-3.72303			-4.26605
		-4.19305			-4.13005			-3.58095			-3.89505
		-4.15505			-4.04402			-3.50903			-3.88802
		-4.12603			-3.98603			-3.46943			-3.80228
		-4.0393			-3.96702			-3.38553			-3.49203
		-3.93203			-3.89202			-3.08195			-3.35153
		-3.92602			-3.82703			-2.92083			-3.34908
		-3.925			-3.78602			-2.7833			-3.13503
		-3.88402			-3.75703			-2.76303			-3.11405
		-3.79002			-3.69602			-2.75118			-2.92802
		-3.69603			-3.65902			-2.68505			-2.82603
		-3.63203			-3.63403			-2.6499			-2.8255
		-3.59915			-3.53183			-2.61502			-2.69575
		-3.59002			-3.46703			-2.57602			-2.52403
		-3.58705			-3.38203			-2.46203			-2.51702
		-3.5445			-3.37403			-2.44403			-2.3526
		-3.51803			-3.35503			-2.38317			-2.33102
		-3.49805			-3.29803			-2.30943			-2.15003
		-3.48765			-3.218			-2.29302			-2.0185
		-3.4449			-3.18802			-2.27403			-2.00903
		-3.44178			-3.10483			-2.09423			-1.95202
		-3.40505			-3.10303			-1.94903			-1.8672
		-3.38103			-2.88303			-1.93075			-1.86395
		-3.34303			-2.88153			-1.92168			-1.805
		-3.29602			-2.78403			-1.90103			-1.80302
		-3.25503			-2.77803			-1.87103			-1.76703
		-3.20102			-2.77605			-1.83202			-1.73488
		-3.15105			-2.74502			-1.82523			-1.71607
		-3.15103			-2.69002			-1.82337			-1.6651
		-3.08905			-2.62302			-1.81903			-1.65002
		-2.99302			-2.614			-1.80402			-1.647
		-2.95985			-2.60305			-1.8035			-1.61433
		-2.81402			-2.60103			-1.78303			-1.56395
		-2.764			-2.52803			-1.77425			-1.50592
		-2.74505			-2.39603			-1.73515			-1.498
		-2.7429			-2.35803			-1.70803			-1.47117
		-2.68435			-2.25343			-1.70103			-1.4672
		-2.65702			-2.177			-1.69303			-1.44403
		-2.64503			-2.17202			-1.67602			-1.4297
		-2.60903			-2.14402			-1.65503			-1.421
		-2.58803			-2.12402			-1.6419			-1.414
		-2.53303			-2.07			-1.63458			-1.39867
		-2.51308			-1.86902			-1.58502			-1.37703
		-2.50203			-1.83203			-1.56437			-1.37278
		-2.48303			-1.80103			-1.54202			-1.362
		-2.47902			-1.75903			-1.53702			-1.35695
		-2.46702			-1.74702			-1.51858			-1.3444
		-2.41503			-1.74503			-1.456			-1.34343
		-2.40188			-1.73902			-1.45203			-1.315
		-2.38683			-1.70503			-1.45			-1.30202
		-2.37122			-1.692			-1.44502			-1.30003
		-2.36703			-1.68803			-1.41003			-1.29435
		-2.34502			-1.65403			-1.41002			-1.29363
		-2.34303			-1.62802			-1.39652			-1.28375
		-2.32607			-1.62703			-1.39603			-1.2797
		-2.31402			-1.616			-1.39203			-1.26013
		-2.28802			-1.54302			-1.37203			-1.255
		-2.25902			-1.529			-1.37			-1.24633
		-2.252			-1.51983			-1.35603			-1.24203
		-2.22802			-1.51345			-1.33303			-1.2351
		-2.22402			-1.48402			-1.31602			-1.213
		-2.22103			-1.46303			-1.30503			-1.2121
		-2.2202			-1.45702			-1.29003			-1.20318
		-2.2127			-1.44202			-1.28402			-1.19205
		-2.207			-1.42602			-1.277			-1.1915
		-2.18903			-1.41103			-1.26903			-1.17968
		-2.16302			-1.3981			-1.216			-1.17868
		-2.16103			-1.39803			-1.17903			-1.17095
		-2.15803			-1.38803			-1.17802			-1.16683
		-2.13802			-1.37703			-1.171			-1.16615
		-2.13			-1.36502			-1.156			-1.14603
		-2.12203			-1.36303			-1.10803			-1.14202
		-2.12			-1.36102			-1.10403			-1.13403
		-2.10303			-1.34303			-1.10203			-1.13217
		-2.10002			-1.335			-1.09102			-1.12988
		-2.09402			-1.33102			-1.088			-1.12603
		-2.08603			-1.324			-1.051			-1.12602
		-2.07803			-1.32102			-1.05003			-1.11992
		-2.05102			-1.31202			-1.042			-1.11278
		-2.01503			-1.29603			-1.03503			-1.09825
		-1.9957			-1.28902			-1.033			-1.09703
		-1.98902			-1.28303			-1.033			-1.08803
		-1.97902			-1.28202			-1.02302			-1.0749
		-1.97003			-1.27502			-1.005			-1.07432
		-1.95603			-1.237			-1.00203			-1.06702
		-1.95062			-1.23303			-0.99802			-1.05903
		-1.94547			-1.22702			-0.98703			-1.05
		-1.9452			-1.21202			-0.977			-1.04803
		-1.91583			-1.20602			-0.97402			-1.0472
		-1.898			-1.199			-0.97102			-1.0375
		-1.85603			-1.18703			-0.967			-1.0301
		-1.827			-1.17765			-0.96103			-1.02802
		-1.82203			-1.176			-0.95803			-1.00903
		-1.822			-1.17502			-0.94942			-1.00502
		-1.81903			-1.167			-0.948			-0.9942
		-1.81302			-1.16405			-0.94403			-0.993
		-1.80502			-1.16403			-0.942			-0.992
		-1.79503			-1.158			-0.94103			-0.98903
		-1.78402			-1.15702			-0.935			-0.986
		-1.77683			-1.14903			-0.929			-0.98502
		-1.74402			-1.143			-0.927			-0.97532
		-1.74302			-1.13803			-0.9236			-0.968
		-1.73702			-1.13802			-0.91403			-0.96402
		-1.73603			-1.13603			-0.908			-0.95702
		-1.73503			-1.13503			-0.90702			-0.95303
		-1.718			-1.121			-0.907			-0.95208
		-1.71603			-1.11703			-0.90402			-0.951
		-1.71202			-1.10602			-0.88803			-0.95
		-1.70802			-1.10102			-0.88302			-0.94935
		-1.69103			-1.089			-0.873			-0.9403
		-1.69002			-1.08803			-0.872			-0.925
		-1.68303			-1.07803			-0.87			-0.91888
		-1.68203			-1.07505			-0.863			-0.91502
		-1.67802			-1.075			-0.853			-0.9141
		-1.67702			-1.06903			-0.85			-0.90672
		-1.67702			-1.06803			-0.845			-0.89232
		-1.67393			-1.06803			-0.84002			-0.89103
		-1.66803			-1.065			-0.83117			-0.888
		-1.6675			-1.06402			-0.82502			-0.888
		-1.6608			-1.05703			-0.811			-0.88203
		-1.65375			-1.04302			-0.81002			-0.8773
		-1.65302			-1.04003			-0.79602			-0.8728
		-1.64863			-1.03502			-0.78203			-0.87002
		-1.64625			-1.03302			-0.771			-0.86855
		-1.64503			-1.02103			-0.76802			-0.86302
		-1.64403			-0.99903			-0.76103			-0.86108
		-1.63902			-0.996			-0.758			-0.859
		-1.63303			-0.98402			-0.75702			-0.858
		-1.61955			-0.982			-0.75502			-0.85303
		-1.61712			-0.97902			-0.754			-0.848
		-1.60103			-0.97302			-0.74702			-0.84338
		-1.59603			-0.97302			-0.74602			-0.84017
		-1.59402			-0.972			-0.74502			-0.8276
		-1.57903			-0.96803			-0.74235			-0.826
		-1.573			-0.96603			-0.73702			-0.8233
		-1.56602			-0.96303			-0.73603			-0.81302
		-1.56602			-0.96002			-0.73602			-0.81
		-1.56403			-0.95502			-0.73302			-0.80402
		-1.53873			-0.95502			-0.732			-0.79303
		-1.53503			-0.95203			-0.732			-0.79303
		-1.53503			-0.94603			-0.727			-0.788
		-1.531			-0.94602			-0.725			-0.78427
		-1.53037			-0.943			-0.72			-0.784
		-1.52302			-0.941			-0.71502			-0.77802
		-1.51225			-0.94002			-0.71103			-0.77202
		-1.51202			-0.94			-0.706			-0.76608
		-1.51202			-0.937			-0.69203			-0.76302
		-1.49502			-0.93603			-0.686			-0.761
		-1.48803			-0.93603			-0.677			-0.75803
		-1.48717			-0.93502			-0.672			-0.75603
		-1.48702			-0.929			-0.663			-0.74807
		-1.482			-0.92702			-0.655			-0.74703
		-1.47703			-0.92602			-0.64802			-0.74292
		-1.477			-0.92103			-0.64402			-0.74268
		-1.476			-0.91903			-0.64203			-0.73902
		-1.47135			-0.91503			-0.642			-0.737
		-1.4687			-0.91402			-0.64			-0.73402
		-1.46703			-0.90703			-0.63502			-0.73302
		-1.46635			-0.906			-0.627			-0.73203
		-1.46302			-0.90503			-0.627			-0.724
		-1.457			-0.905			-0.61702			-0.72103
		-1.45075			-0.902			-0.612			-0.71723
		-1.4426			-0.89835			-0.57503			-0.71703
		-1.43102			-0.89702			-0.564			-0.716
		-1.428			-0.896			-0.559			-0.716
		-1.41003			-0.89403			-0.556			-0.71555
		-1.40738			-0.89352			-0.516			-0.70903
		-1.39902			-0.89203			-0.483			-0.70802
		-1.39715			-0.89007			-0.428			-0.70652
		-1.39702			-0.88702			-0.41803			-0.70603
		-1.37803			-0.88602						-0.70502
		-1.35803			-0.88502						-0.70418
		-1.34393			-0.8831						-0.69702
		-1.336			-0.88203						-0.6906
		-1.32948			-0.88002						-0.689
		-1.321			-0.877						-0.688
		-1.31302			-0.872						-0.6873
		-1.30895			-0.86902						-0.68203
		-1.3018			-0.86703						-0.682
		-1.29602			-0.86603						-0.67902
		-1.295			-0.86402						-0.67803
		-1.28813			-0.863						-0.67403
		-1.28502			-0.863						-0.67202
		-1.28302			-0.86202						-0.66803
		-1.282			-0.86002						-0.66402
		-1.267			-0.85902						-0.66303
		-1.26475			-0.85902						-0.663
		-1.2643			-0.85802						-0.66102
		-1.2521			-0.85403						-0.66
		-1.24			-0.854						-0.6576
		-1.23723			-0.85003						-0.655
		-1.237			-0.846						-0.65223
		-1.232			-0.84297						-0.65122
		-1.22603			-0.84002						-0.65003
		-1.226			-0.83703						-0.649
		-1.21702			-0.836						-0.64802
		-1.2136			-0.83203						-0.64502
		-1.2128			-0.82803						-0.6447
		-1.2125			-0.827						-0.64103
		-1.20865			-0.82602						-0.639
		-1.2074			-0.822						-0.63802
		-1.204			-0.82102						-0.63402
		-1.19677			-0.81603						-0.634
		-1.19605			-0.81403						-0.63302
		-1.19528			-0.81302						-0.63053
		-1.19002			-0.81102						-0.63003
		-1.189			-0.80402						-0.627
		-1.18803			-0.79703						-0.62303
		-1.188			-0.79402						-0.6223
		-1.188			-0.79303						-0.62
		-1.18602			-0.79103						-0.61802
		-1.18305			-0.79103						-0.61715
		-1.17573			-0.78902						-0.614
		-1.17462			-0.78703						-0.612
		-1.169			-0.787						-0.6096
		-1.16203			-0.78602						-0.608
		-1.16135			-0.78545						-0.604
		-1.16003			-0.78503						-0.604
		-1.15828			-0.78103						-0.602
		-1.1534			-0.78003						-0.60003
		-1.153			-0.77902						-0.599
		-1.14802			-0.77802						-0.599
		-1.144			-0.777						-0.599
		-1.1428			-0.77503						-0.59803
		-1.13702			-0.774						-0.598
		-1.13502			-0.77302						-0.598
		-1.1349			-0.76868						-0.59717
		-1.13207			-0.76802						-0.59602
		-1.13			-0.768						-0.59185
		-1.12985			-0.76503						-0.59002
		-1.12113			-0.762						-0.59
		-1.11902			-0.76103						-0.58938
		-1.116			-0.761						-0.587
		-1.11383			-0.75802						-0.58447
		-1.11202			-0.75802						-0.58302
		-1.111			-0.75702						-0.583
		-1.11003			-0.75602						-0.581
		-1.10803			-0.75503						-0.578
		-1.10703			-0.75502						-0.577
		-1.10685			-0.75002						-0.575
		-1.10562			-0.74802						-0.57438
		-1.099			-0.748						-0.57403
		-1.09867			-0.74475						-0.57302
		-1.09125			-0.744						-0.572
		-1.0872			-0.74303						-0.571
		-1.08677			-0.74003						-0.567
		-1.08632			-0.73802						-0.56603
		-1.08302			-0.73802						-0.56602
		-1.07803			-0.73703						-0.564
		-1.078			-0.735						-0.56355
		-1.07503			-0.733						-0.56303
		-1.075			-0.732						-0.56075
		-1.06627			-0.72903						-0.56003
		-1.06402			-0.729						-0.559
		-1.063			-0.72803						-0.555
		-1.06003			-0.72702						-0.55402
		-1.04892			-0.727						-0.54903
		-1.0404			-0.72602						-0.549
		-1.03903			-0.726						-0.5478
		-1.038			-0.718						-0.54702
		-1.03368			-0.718						-0.54602
		-1.03027			-0.71702						-0.54503
		-1.02803			-0.717						-0.54503
		-1.028			-0.717						-0.54502
		-1.0277			-0.71603						-0.54403
		-1.023			-0.71502						-0.54202
		-1.01245			-0.71402						-0.538
		-1.003			-0.71103						-0.536
		-1.00283			-0.71102						-0.534
		-1.00128			-0.711						-0.533
		-0.99302			-0.707						-0.53187
		-0.99225			-0.70602						-0.53
		-0.99215			-0.70602						-0.528
		-0.98975			-0.706						-0.52702
		-0.98805			-0.70502						-0.52502
		-0.98792			-0.705						-0.52502
		-0.9867			-0.7						-0.523
		-0.981			-0.69302						-0.523
		-0.97373			-0.69203						-0.522
		-0.96955			-0.69102						-0.51895
		-0.96947			-0.68903						-0.518
		-0.9672			-0.688						-0.514
		-0.96102			-0.68735						-0.514
		-0.95743			-0.68703						-0.51103
		-0.95255			-0.68635						-0.50902
		-0.94603			-0.679						-0.50702
		-0.94102			-0.678						-0.507
		-0.93502			-0.67702						-0.506
		-0.93203			-0.67602						-0.506
		-0.93145			-0.676						-0.50302
		-0.93102			-0.675						-0.502
		-0.93003			-0.675						-0.5
		-0.92908			-0.673						-0.49702
		-0.92492			-0.673						-0.49502
		-0.91903			-0.67202						-0.487
		-0.91902			-0.67003						-0.486
		-0.91602			-0.66902						-0.486
		-0.91072			-0.6678						-0.48503
		-0.91002			-0.66702						-0.482
		-0.90972			-0.66603						-0.48103
		-0.9081			-0.66602						-0.481
		-0.902			-0.665						-0.481
		-0.897			-0.66382						-0.47803
		-0.89302			-0.66103						-0.47502
		-0.89257			-0.66102						-0.472
		-0.88902			-0.661						-0.46502
		-0.88802			-0.658						-0.46303
		-0.88487			-0.65702						-0.463
		-0.87648			-0.65603						-0.462
		-0.87503			-0.654						-0.461
		-0.87483			-0.65103						-0.459
		-0.8684			-0.65						-0.458
		-0.868			-0.64603						-0.457
		-0.86603			-0.64503						-0.456
		-0.8651			-0.645						-0.45403
		-0.86115			-0.64302						-0.451
		-0.85902			-0.64302						-0.446
		-0.85725			-0.643						-0.445
		-0.855			-0.64203						-0.43602
		-0.85335			-0.641						-0.433
		-0.84946			-0.64002						-0.42947
		-0.84725			-0.63702						-0.418
		-0.84605			-0.63702						-0.41503
		-0.84203			-0.635						-0.414
		-0.83812			-0.635						-0.40903
		-0.838			-0.63402						-0.407
		-0.83503			-0.63302						-0.392
		-0.83135			-0.633						-0.386
		-0.82903			-0.63002						-0.382
		-0.82502			-0.62902						-0.38102
		-0.825			-0.627						-0.38002
		-0.8238			-0.627						-0.35902
		-0.81908			-0.62602						-0.357
		-0.81735			-0.62503						-0.354
		-0.81475			-0.62403						-0.341
		-0.81398			-0.62403						-0.276
		-0.81			-0.62302
		-0.80938			-0.623
		-0.80938			-0.62103
		-0.80803			-0.62
		-0.80546			-0.61703
		-0.79965			-0.617
		-0.799			-0.616
		-0.796			-0.615
		-0.793			-0.615
		-0.79			-0.61303
		-0.78402			-0.613
		-0.78365			-0.61203
		-0.78343			-0.61202
		-0.78238			-0.61202
		-0.78202			-0.61147
		-0.78177			-0.61115
		-0.78005			-0.611
		-0.77903			-0.611
		-0.778			-0.61002
		-0.7779			-0.61
		-0.77602			-0.60703
		-0.77455			-0.607
		-0.7744			-0.606
		-0.77267			-0.60502
		-0.77202			-0.60402
		-0.77037			-0.6036
		-0.767			-0.60303
		-0.76603			-0.60303
		-0.76402			-0.60202
		-0.759			-0.60103
		-0.75803			-0.60003
		-0.75302			-0.59902
		-0.7519			-0.599
		-0.75102			-0.59703
		-0.74003			-0.59703
		-0.73913			-0.59703
		-0.73903			-0.596
		-0.73848			-0.592
		-0.7373			-0.58902
		-0.7352			-0.589
		-0.73075			-0.58803
		-0.72703			-0.58803
		-0.72428			-0.58702
		-0.71902			-0.587
		-0.71818			-0.58603
		-0.718			-0.586
		-0.7179			-0.58502
		-0.71717			-0.58502
		-0.71603			-0.585
		-0.71103			-0.58302
		-0.70902			-0.583
		-0.70702			-0.58203
		-0.7064			-0.58103
		-0.705			-0.58102
		-0.70332			-0.581
		-0.70202			-0.58002
		-0.701			-0.578
		-0.6951			-0.5776
		-0.69502			-0.57603
		-0.69265			-0.57603
		-0.69072			-0.5711
		-0.69			-0.57103
		-0.68935			-0.57003
		-0.68903			-0.569
		-0.68802			-0.56702
		-0.688			-0.567
		-0.687			-0.56662
		-0.6863			-0.56502
		-0.686			-0.564
		-0.68202			-0.56302
		-0.679			-0.56
		-0.6774			-0.559
		-0.67702			-0.55803
		-0.6759			-0.55803
		-0.67555			-0.55702
		-0.67503			-0.557
		-0.67403			-0.557
		-0.67362			-0.549
		-0.67297			-0.54803
		-0.67045			-0.548
		-0.6701			-0.54703
		-0.67002			-0.546
		-0.66742			-0.54503
		-0.667			-0.54402
		-0.667			-0.544
		-0.667			-0.543
		-0.667			-0.543
		-0.66652			-0.542
		-0.66602			-0.54103
		-0.66602			-0.54028
		-0.6587			-0.54002
		-0.658			-0.53903
		-0.65797			-0.53903
		-0.656			-0.536
		-0.65542			-0.53303
		-0.655			-0.53302
		-0.65303			-0.53203
		-0.653			-0.532
		-0.65202			-0.532
		-0.64902			-0.532
		-0.64902			-0.53103
		-0.64403			-0.53003
		-0.64378			-0.52902
		-0.643			-0.52802
		-0.64233			-0.528
		-0.6381			-0.527
		-0.63802			-0.52503
		-0.63702			-0.525
		-0.637			-0.52402
		-0.637			-0.52372
		-0.63313			-0.522
		-0.63302			-0.522
		-0.631			-0.522
		-0.62923			-0.52003
		-0.629			-0.52
		-0.62802			-0.51903
		-0.628			-0.51902
		-0.627			-0.51602
		-0.626			-0.516
		-0.62535			-0.51452
		-0.62402			-0.51403
		-0.624			-0.51402
		-0.62302			-0.51103
		-0.61507			-0.511
		-0.615			-0.50802
		-0.61402			-0.508
		-0.61203			-0.506
		-0.61192			-0.506
		-0.60967			-0.50403
		-0.60472			-0.504
		-0.60265			-0.50203
		-0.602			-0.502
		-0.60122			-0.49802
		-0.60113			-0.497
		-0.60003			-0.49603
		-0.60002			-0.49602
		-0.60002			-0.496
		-0.59803			-0.495
		-0.598			-0.49402
		-0.59715			-0.494
		-0.59715			-0.49302
		-0.5967			-0.492
		-0.59403			-0.49103
		-0.59302			-0.491
		-0.593			-0.49003
		-0.593			-0.49003
		-0.59282			-0.49002
		-0.59103			-0.48702
		-0.59			-0.48603
		-0.58955			-0.486
		-0.589			-0.483
		-0.587			-0.482
		-0.586			-0.482
		-0.58503			-0.47803
		-0.581			-0.478
		-0.58			-0.47402
		-0.57903			-0.473
		-0.579			-0.471
		-0.579			-0.467
		-0.5786			-0.467
		-0.5774			-0.466
		-0.577			-0.46402
		-0.57683			-0.46303
		-0.57677			-0.461
		-0.57673			-0.45902
		-0.576			-0.459
		-0.57403			-0.45503
		-0.57403			-0.453
		-0.57303			-0.451
		-0.57302			-0.449
		-0.573			-0.448
		-0.57298			-0.44702
		-0.57222			-0.44602
		-0.57203			-0.443
		-0.57178			-0.443
		-0.57077			-0.436
		-0.57002			-0.43295
		-0.56702			-0.432
		-0.567			-0.41303
		-0.56603			-0.40703
		-0.56575			-0.407
		-0.56303			-0.40437
		-0.563			-0.404
		-0.56203			-0.401
		-0.562			-0.40002
		-0.559			-0.4
		-0.55803			-0.399
		-0.55802			-0.39603
		-0.55802			-0.394
		-0.55727			-0.394
		-0.557			-0.393
		-0.55697			-0.39002
		-0.55503			-0.386
		-0.55403			-0.38403
		-0.55303			-0.382
		-0.55203			-0.38003
		-0.55203			-0.374
		-0.549			-0.37
		-0.54803			-0.37
		-0.54695			-0.364
		-0.54627			-0.36102
		-0.54502			-0.361
		-0.544			-0.361
		-0.544			-0.36
		-0.5436			-0.35002
		-0.543			-0.34502
		-0.53803			-0.341
		-0.53723			-0.33902
		-0.53502			-0.33503
		-0.533			-0.335
		-0.533			-0.333
		-0.53208			-0.328
		-0.53202			-0.31902
		-0.53003			-0.304
		-0.53
		-0.5285
		-0.52823
		-0.52603
		-0.5256
		-0.52502
		-0.52485
		-0.52337
		-0.523
		-0.522
		-0.522
		-0.522
		-0.522
		-0.522
		-0.52103
		-0.521
		-0.52003
		-0.51957
		-0.51802
		-0.518
		-0.51735
		-0.51712
		-0.51702
		-0.51603
		-0.51602
		-0.51557
		-0.51515
		-0.51503
		-0.51402
		-0.5137
		-0.51345
		-0.51302
		-0.51302
		-0.51202
		-0.51103
		-0.51015
		-0.51003
		-0.50903
		-0.50887
		-0.50598
		-0.5059
		-0.50503
		-0.505
		-0.505
		-0.50372
		-0.5023
		-0.50203
		-0.502
		-0.5005
		-0.49902
		-0.499
		-0.499
		-0.49803
		-0.498
		-0.498
		-0.4979
		-0.49685
		-0.4961
		-0.49602
		-0.495
		-0.49403
		-0.4939
		-0.49303
		-0.49233
		-0.49198
		-0.49103
		-0.49
		-0.48848
		-0.48812
		-0.48802
		-0.488
		-0.48777
		-0.487
		-0.48603
		-0.486
		-0.48565
		-0.48562
		-0.48553
		-0.48495
		-0.48492
		-0.48403
		-0.48402
		-0.484
		-0.48325
		-0.48215
		-0.48203
		-0.482
		-0.482
		-0.48133
		-0.481
		-0.481
		-0.48
		-0.4799
		-0.47703
		-0.4764
		-0.47602
		-0.47602
		-0.47602
		-0.476
		-0.475
		-0.473
		-0.47245
		-0.47202
		-0.472
		-0.471
		-0.47002
		-0.46815
		-0.46705
		-0.467
		-0.46642
		-0.46603
		-0.46502
		-0.46453
		-0.46203
		-0.46102
		-0.461
		-0.458
		-0.45642
		-0.45457
		-0.454
		-0.452
		-0.452
		-0.45102
		-0.449
		-0.44892
		-0.448
		-0.44735
		-0.44703
		-0.447
		-0.44622
		-0.44603
		-0.446
		-0.44477
		-0.444
		-0.441
		-0.4407
		-0.438
		-0.43703
		-0.43502
		-0.43485
		-0.43457
		-0.43367
		-0.4322
		-0.43218
		-0.42903
		-0.429
		-0.429
		-0.42728
		-0.42708
		-0.42605
		-0.426
		-0.42203
		-0.4204
		-0.41927
		-0.41802
		-0.41645
		-0.41102
		-0.411
		-0.40958
		-0.40605
		-0.40503
		-0.40503
		-0.40202
		-0.40102
		-0.4
		-0.396
		-0.39433
		-0.394
		-0.39058
		-0.389
		-0.3877
		-0.38635
		-0.38613
		-0.384
		-0.3825
		-0.38202
		-0.37973
		-0.3758
		-0.37545
		-0.37478
		-0.373
		-0.367
		-0.36503
		-0.36143
		-0.35985
		-0.3592
		-0.35602
		-0.353
		-0.35147
		-0.34902
		-0.3487
		-0.3484
		-0.3452
		-0.33392
		-0.3339
		-0.33002
		-0.32688
		-0.31832
		-0.31283
		-0.30903
		-0.28602
		-0.28102
		-0.20803
		-0.206

## Sheet: PrefVNon Ttests
	Fig 4B						Fig 4C						Fig 4D						Fig 4E
	Paired t-test						Paired t-test						Paired t-test						Paired t-test
	Holm-Šídák method						Holm-Šídák method						Holm-Šídák method						Holm-Šídák method
	Time	P value	t ratio	df	Adjusted P Value		Time	P value	t ratio	df	Adjusted P Value		Time	P value	t ratio	df	Adjusted P Value		Time	P value	t ratio	df	Adjusted P Value
	-3	0.607766	0.5157	67	0.995549		-3	0.461265	0.7408	70	0.997941		-3	0.564578	0.5838	25	0.999942		-3	0.55769	0.5905	47	0.998767
	-2.9	0.218915	1.241	67	0.959721		-2.9	0.204351	1.281	70	0.979476		-2.9	0.894505	0.134	25	0.999965		-2.9	0.641209	0.469	47	0.998767
	-2.8	0.14981	1.457	67	0.930945		-2.8	0.247111	1.167	70	0.984913		-2.8	0.641341	0.4715	25	0.999965		-2.8	0.112901	1.615	47	0.939138
	-2.7	0.538611	0.6181	67	0.995549		-2.7	0.187739	1.33	70	0.976312		-2.7	0.191902	1.341	25	0.993986		-2.7	0.96088	0.04931	47	0.999475
	-2.6	0.55896	0.5873	67	0.995549		-2.6	0.982125	0.02249	70	0.999693		-2.6	0.813776	0.2381	25	0.999965		-2.6	0.188571	1.334	47	0.976746
	-2.5	0.185841	1.337	67	0.943775		-2.5	0.713375	0.3688	70	0.999693		-2.5	0.666219	0.4365	25	0.999965		-2.5	0.015809	2.504	47	0.427497
	-2.4	0.302904	1.038	67	0.981111		-2.4	0.864603	0.1711	70	0.999693		-2.4	0.357639	0.9372	25	0.999777		-2.4	0.368951	0.9072	47	0.997304
	-2.3	0.574586	0.5641	67	0.995549		-2.3	0.850475	0.1892	70	0.999693		-2.3	0.245954	1.188	25	0.998486		-2.3	0.591621	0.5402	47	0.998767
	-2.2	0.081892	1.766	67	0.818916		-2.2	0.697695	0.39	70	0.999693		-2.2	0.969698	0.03837	25	0.999965		-2.2	0.365605	0.9136	47	0.997304
	-2.1	0.408009	0.8326	67	0.99107		-2.1	0.139065	1.496	70	0.941866		-2.1	0.337961	0.9769	25	0.999738		-2.1	0.848598	0.192	47	0.999475
	-2	0.087863	1.732	67	0.825763		-2	0.952488	0.0598	70	0.999693		-2	0.713839	0.3709	25	0.999965		-2	0.230921	1.214	47	0.985459
	-1.9	0.006952	2.785	67	0.194471		-1.9	0.546725	0.6056	70	0.999192		-1.9	0.402286	0.852	25	0.999805		-1.9	0.220317	1.242	47	0.985459
	-1.8	0.109796	1.621	67	0.876742		-1.8	0.025131	2.289	70	0.497019		-1.8	0.269598	1.129	25	0.999004		-1.8	0.922584	0.0977	47	0.999475
	-1.7	0.305957	1.032	67	0.981111		-1.7	0.355645	0.9298	70	0.996699		-1.7	0.75986	0.309	25	0.999965		-1.7	0.170136	1.393	47	0.97369
	-1.6	0.060268	1.911	67	0.745265		-1.6	0.376157	0.8907	70	0.996699		-1.6	0.04288	2.133	25	0.754009		-1.6	0.293198	1.063	47	0.994511
	-1.5	4.4e-05	4.372	67	0.001754		-1.5	0.395942	0.8541	70	0.996699		-1.5	0.69444	0.3974	25	0.999965		-1.5	0.670461	0.4282	47	0.998767
	-1.4	0.010561	2.631	67	0.272768		-1.4	0.232025	1.206	70	0.984913		-1.4	0.377792	0.8979	25	0.999805		-1.4	0.105255	1.652	47	0.937986
	-1.3	0.000462	3.683	67	0.016485		-1.3	0.058797	1.921	70	0.766441		-1.3	0.846653	0.1954	25	0.999965		-1.3	0.092997	1.715	47	0.920965
	-1.2	0.000736	3.539	67	0.024735		-1.2	0.064011	1.882	70	0.77635		-1.2	0.061265	1.96	25	0.859123		-1.2	0.04221	2.088	47	0.732723
	-1.1	0.011711	2.592	67	0.289382		-1.1	0.002859	3.091	70	0.082303		-1.1	0.007232	2.925	25	0.235504		-1.1	0.38984	0.8679	47	0.997304
	-1	0.004549	2.936	67	0.135761		-1	8.5e-05	4.173	70	0.002722		-1	0.021804	2.446	25	0.537721		-1	0.424573	0.8055	47	0.997304
	-0.9	0.020507	2.373	67	0.428467		-0.9	2.4e-05	4.526	70	0.000838		-0.9	0.033532	2.25	25	0.686401		-0.9	0.142631	1.491	47	0.960507
	-0.8	0.000529	3.642	67	0.018334		-0.8	3.5e-05	4.422	70	0.001191		-0.8	0.003315	3.247	25	0.11854		-0.8	0.0092	2.717	47	0.296183
	-0.7	5.7e-05	4.296	67	0.002238		-0.7	3.7e-05	4.409	70	0.00121		-0.7	0.000282	4.218	25	0.010955		-0.7	0.01418	2.548	47	0.410462
	-0.6	0.000143	4.035	67	0.005404		-0.6	9e-06	4.778	70	0.00034		-0.6	0.39297	0.8693	25	0.999805		-0.6	0.055786	1.961	47	0.81075
	-0.5	0.001076	3.418	67	0.03491		-0.5	1e-06	5.346	70	4e-05		-0.5	0.155898	1.463	25	0.987802		-0.5	0.001644	3.341	47	0.06214
	-0.4	0.000271	3.845	67	0.00999		-0.4	<0.000001	5.831	70	6e-06		-0.4	0.000171	4.413	25	0.006808		-0.4	0.015284	2.518	47	0.42562
	-0.3	0.016122	2.469	67	0.365619		-0.3	<0.000001	6.249	70	1e-06		-0.3	0.01221	2.702	25	0.357418		-0.3	0.022214	2.365	47	0.523513
	-0.2	0.027515	2.253	67	0.502176		-0.2	<0.000001	5.434	70	2.9e-05		-0.2	0.37972	0.8942	25	0.999805		-0.2	0.000969	3.52	47	0.03805
	-0.1	0.023711	2.315	67	0.464159		-0.1	0.000147	4.015	70	0.00455		-0.1	0.091388	1.756	25	0.937917		-0.1	0.080459	1.787	47	0.896147
	0	0.14549	1.473	67	0.930945		0	0.063041	1.889	70	0.77635		0	0.142704	1.513	25	0.985301		0	0.03533	2.167	47	0.683687
	0.1	0.065524	1.872	67	0.759049		0.1	0.230581	1.209	70	0.984913		0.1	0.290706	1.079	25	0.999263		0.1	0.110087	1.629	47	0.939138
	0.2	0.031346	2.199	67	0.534368		0.2	0.685086	0.4072	70	0.999693		0.2	0.406374	0.8445	25	0.999805		0.2	0.166308	1.406	47	0.97369
	0.3	0.038498	2.111	67	0.59463		0.3	0.595571	0.5332	70	0.999284		0.3	0.179963	1.379	25	0.992988		0.3	0.524905	0.6406	47	0.998767
	0.4	0.149781	1.457	67	0.930945		0.4	0.109148	1.623	70	0.90089		0.4	0.077795	1.839	25	0.91193		0.4	0.899036	0.1276	47	0.999475
	0.5	0.261796	1.132	67	0.973811		0.5	0.042209	2.069	70	0.674137		0.5	0.033708	2.247	25	0.686401		0.5	0.073019	1.834	47	0.88033
	0.6	0.49164	0.6915	67	0.99554		0.6	0.055976	1.944	70	0.763097		0.6	0.139905	1.525	25	0.985301		0.6	0.118712	1.589	47	0.939138
	0.7	0.622819	0.4941	67	0.995549		0.7	0.102679	1.654	70	0.89722		0.7	0.556312	0.5963	25	0.999942		0.7	0.021222	2.384	47	0.517757
	0.8	0.743744	0.3283	67	0.995549		0.8	0.020352	2.374	70	0.437706		0.8	0.452872	0.7625	25	0.999805		0.8	0.04167	2.094	47	0.732723
	0.9	0.622164	0.4951	67	0.995549		0.9	0.014238	2.514	70	0.340228		0.9	0.673438	0.4264	25	0.999965		0.9	0.303985	1.039	47	0.994511

## Sheet: Saline LP Left
ID	sex	Sidepref	LP	Zscore -3	-2.9	-2.8	-2.7	-2.6	-2.5	-2.4	-2.3	-2.2	-2.1	-2	-1.9	-1.8	-1.7	-1.6	-1.5	-1.4	-1.3	-1.2	-1.1	-1	-0.9	-0.8	-0.7	-0.6	-0.5	-0.4	-0.3	-0.2	-0.1	1.52656e-15	0.1	0.2	0.3	0.4	0.5	0.6	0.7	0.8	0.9
CDH16002_20161017_S_01A	F	X	L	-0.0719046	0.0436347	-0.0884102	0.076646	0.0106235	-0.055399	-0.253466	-0.0223878	-0.0388934	-0.0223878	-0.0719046	-0.104916	-0.170938	-0.0884102	-0.0884102	-0.20395	-0.335995	-0.0388934	-0.121421	-0.220455	-0.319489	-0.187444	-0.385511	-0.435028	-0.418523	-0.451534	-0.418523	-0.269972	-0.137927	-0.137927	-0.302983	-0.220455	-0.402017	-0.154433	-0.302983	-0.369006	-0.385511	-0.418523	-0.3525	-0.286478
CDH16002_20161017_S_17A	F		L	-0.272274	-0.105741	-0.189008	-0.105741	-0.105741	-0.0224741	-0.147374	0.0191593	0.0191593	-0.105741	-0.0641074	-0.0224741	0.102426	0.102426	0.0191593	-0.105741	-0.105741	-0.0224741	-0.0641074	0.144059	-0.0224741	-0.147374	-0.147374	-0.230641	-0.189008	-0.230641	0.0607927	0.227326	0.352226	0.851827	0.64366	0.310593	-0.189008	-0.105741	-0.0224741	-0.0224741	0.102426	-0.230641	0.185693	-0.189008
CDH16002_20161017_S_19A	F		L	-0.258667	-0.192712	-0.29824	-0.430151	-0.311431	-0.271858	-0.311431	-0.126756	-0.390578	-0.41696	-0.324623	-0.324623	-0.390578	-0.390578	-0.337814	-0.271858	-0.245476	-0.285049	-0.29824	-0.179521	-0.192712	-0.0344189	0.0315365	0.0974919	-0.0871832	-0.219094	-0.29824	-0.232285	-0.548871	-0.496106	-0.456533	-0.469724	-0.575253	-0.364196	0.242594	0.361313	0.704281	0.968103	0.994485	0.849383
CDH16003_20161018_S_17A	F	X	R	0.0206817	0.0206817	0.0206817	-0.211117	-0.0636087	-0.147899	0.0628269	0.0417543	0.104972	0.25248	0.0838995	0.0838995	-0.0846813	0.0206817	0.104972	0.0628269	-0.0214635	-0.00039092	0.104972	-0.0214635	-0.211117	-0.147899	-0.295407	-0.31648	-0.23219	-0.147899	-0.211117	-0.463988	-0.31648	-0.147899	-0.147899	0.399989	0.25248	-0.0846813	-0.253262	-0.379698	-0.40077	-0.421843	-0.421843	-0.23219
CDH16005_20161021_S_05A	M	X	L	0.0405724	-0.0210305	-0.0826334	0.102175	0.0405724	-0.0210305	-0.0826334	-0.0826334	-0.144236	0.0405724	-0.0826334	-0.144236	-0.0826334	-0.0826334	-0.0826334	-0.0826334	0.0405724	-0.0210305	0.286984	0.102175	0.41019	0.348587	0.286984	0.656601	0.594998	0.84141	0.594998	0.0405724	0.41019	0.41019	0.286984	0.225381	-0.205839	-0.205839	-0.0826334	0.0405724	-0.0826334	0.163778	-0.0210305	0.102175
CDH16005_20161021_S_07A	M		L	0.0408914	0.0408914	0.0408914	-0.196148	-0.0381218	-0.117135	-0.156642	0.0408914	0.159411	-0.314668	0.0408914	0.080398	0.119905	0.0408914	-0.156642	0.080398	-0.354175	-0.156642	0.00138477	0.00138477	-0.0381218	0.080398	-0.314668	0.080398	-0.156642	-0.235655	-0.0381218	0.198918	0.159411	0.317438	0.356944	0.0408914	0.00138477	0.080398	0.238424	0.159411	0.198918	0.396451	0.198918	-0.156642
CDH16005_20161021_S_07B	M	X	L	-0.118325	-0.343319	-0.302411	-0.261503	-0.118325	-0.343319	-0.40468	-0.0569637	-0.281957	-0.0774176	0.0862137	0.0862137	0.229391	0.249845	0.372569	-0.138779	0.168029	-0.0774176	0.106668	-0.159233	-0.0774176	0.0862137	0.147575	0.147575	0.0657598	0.0862137	0.106668	0.0657598	0.249845	-0.179687	0.290753	0.495292	0.372569	0.290753	0.024852	-0.384226	-0.0569637	0.0453059	0.393022	0.229391
CDH16005_20161021_S_07C	M	X	L	0.314697	0.0762609	0.280634	0.280634	0.21251	0.21251	-0.0259258	0.246572	0.485008	0.21251	0.0421986	0.178448	0.0762609	0.0081364	0.144385	-0.196237	0.178448	0.0762609	0.178448	0.0081364	0.0421986	0.314697	0.416883	0.144385	0.144385	0.0081364	-0.230299	-0.0599881	-0.264362	-0.0599881	0.0762609	-0.0599881	-0.128113	-0.0599881	-0.366548	-0.230299	-0.162175	-0.162175	-0.0259258	-0.332486
CDH16005_20161021_S_07D	M		L	-0.183932	0.0991319	-0.212239	-0.0424002	-0.240545	-0.183932	-0.183932	-0.240545	-0.410384	-0.410384	-0.353771	-0.297158	-0.410384	-0.0707066	-0.127319	-0.297158	0.0991319	0.0142126	-0.297158	-0.127319	0.127438	0.155745	0.155745	-0.183932	-0.325464	-0.353771	-0.523609	-0.523609	-0.43869	-0.551916	-0.608529	-0.297158	-0.410384	-0.382077	-0.382077	-0.551916	-0.495303	-0.410384	-0.240545	-0.212239
CDH16005_20161021_S_09A	M		R	0.173483	-0.235202	-0.0308599	-0.0308599	-0.153465	0.132614	-0.112597	0.132614	-0.153465	-0.0308599	-0.0308599	0.0917456	0.0100086	0.0100086	-0.112597	-0.0308599	0.0917456	-0.194334	0.0917456	-0.0308599	0.0508771	-0.112597	-0.235202	0.214351	-0.194334	-0.0308599	-0.112597	-0.235202	-0.0717284	-0.0717284	0.0917456	-0.194334	0.255219	0.255219	0.0508771	0.296088	0.132614	0.623036	0.0508771	0.459562
CDH16005_20161021_S_09B	M		R	0.0330467	-0.0224237	0.254929	0.0885172	-0.0778942	0.199458	0.254929	-0.0778942	0.0885172	0.0330467	0.0885172	0.310399	0.199458	0.0885172	0.0330467	0.0330467	0.0885172	-0.0224237	0.0330467	-0.133365	-0.244306	-0.133365	0.0330467	0.199458	0.254929	0.310399	0.199458	-0.0778942	-0.133365	-0.133365	-0.0224237	0.0330467	-0.133365	-0.0778942	0.0885172	0.42134	0.254929	0.143988	0.0330467	0.199458
CDH16005_20161021_S_09C	M	X	R	-0.0180648	0.0704972	-0.0180648	0.0704972	0.114778	0.247621	0.159059	-0.0623458	0.114778	-0.0623458	0.0262162	-0.0623458	-0.23947	-0.106627	0.159059	0.20334	-0.150908	-0.0623458	0.0704972	-0.0623458	-0.0623458	0.0262162	-0.0623458	-0.195189	-0.283751	-0.106627	-0.23947	-0.150908	0.0262162	-0.195189	-0.283751	-0.328032	-0.195189	-0.283751	-0.23947	-0.23947	-0.195189	-0.195189	-0.0623458	-0.150908
CDH16005_20161021_S_09D	M		L	-0.191302	-0.0446822	-0.0935554	-0.0935554	-0.191302	-0.240175	-0.191302	-0.142429	-0.0446822	-0.142429	-0.142429	-0.0935554	-0.289048	-0.240175	-0.191302	-0.191302	-0.191302	-0.142429	-0.142429	-0.240175	-0.240175	-0.191302	-0.0935554	-0.0446822	-0.0935554	0.00419098	-0.191302	-0.289048	-0.191302	-0.191302	-0.240175	-0.289048	-0.289048	-0.240175	-0.240175	-0.142429	-0.191302	-0.289048	-0.240175	-0.289048
CDH16005_20161021_S_09E	M		L	0.129877	0.0628379	-0.00420122	0.129877	0.0628379	-0.138279	-0.205319	0.0628379	-0.00420122	-0.138279	-0.205319	-0.00420122	-0.00420122	0.263955	-0.272358	0.0628379	-0.00420122	-0.00420122	0.196916	-0.0712404	-0.00420122	-0.0712404	0.398034	0.263955	0.800268	0.66619	0.66619	-0.205319	-0.205319	-0.272358	-0.272358	0.196916	0.330994	0.867308	1.13546	1.13546	1.33658	1.33658	1.2025	0.599151
CDH16005_20161021_S_13A	M		L	-0.218959	-0.346754	-0.133762	-0.240258	0.015333	-0.0485648	-0.0485648	0.228325	0.015333	0.143128	0.292223	0.462617	0.334822	0.611712	0.526515	0.526515	0.547814	0.441318	0.633011	0.547814	1.10159	0.739508	0.782106	0.143128	-0.389353	-0.538448	-0.708842	-0.836637	-0.75144	-0.666243	-0.495849	-0.431951	-0.346754	0.0366322	0.313522	0.611712	0.718208	0.569114	0.462617	0.270924
CDH16005_20161021_S_15A	M	X	L	0.265946	0.246846	-0.0969582	0.189545	-0.0587578	0.0367433	0.132244	-0.0396575	0.0367433	-0.24976	-0.364361	-0.383461	-0.364361	-0.440762	-0.555363	-0.24976	-0.459862	-0.498063	-0.574463	-0.517163	-0.383461	-0.0969582	-0.24976	0.170445	0.495148	0.552449	0.819852	0.476048	0.571549	0.304146	0.380547	0.342347	0.132244	0.113144	-0.30706	-0.421662	-0.459862	-0.0205573	-0.211559	-0.364361
CDH16005_20161021_S_15B	M	X	L	0.0312769	0.164901	-0.0132645	-0.280513	-0.19143	-0.146889	-0.146889	-0.102347	-0.102347	-0.057806	0.12036	0.12036	0.877564	0.164901	0.253984	0.43215	0.253984	0.298526	0.209443	0.0312769	0.298526	0.164901	-0.057806	0.0312769	0.253984	-0.102347	0.253984	0.43215	0.343067	0.565774	-0.057806	-0.19143	-0.280513	-0.235972	-0.19143	-0.146889	-0.102347	-0.102347	-0.280513	-0.102347
CDH16005_20161021_S_15C	M	X	R	0.124566	-0.112239	-0.033304	-0.033304	0.0193194	0.0456311	0.256125	-0.033304	-0.164863	0.203501	-0.0069923	-0.0859274	-0.375356	-0.270109	-0.322733	-0.42798	-0.243798	-0.112239	-0.270109	-0.112239	-0.243798	-0.191174	-0.191174	-0.243798	-0.033304	-0.138551	-0.0069923	-0.033304	-0.033304	0.124566	0.17719	0.0456311	0.0982545	0.203501	-0.0069923	-0.0596157	-0.112239	-0.217486	-0.0596157	-0.349045
CDH16005_20161021_S_17A	M	X	L	-0.0111908	-0.066829	-0.0111908	-0.178105	0.155724	-0.233744	0.378277	0.322639	0.100086	0.211362	0.0444475	0.100086	0.267	-0.178105	-0.122467	-0.233744	-0.0111908	-0.066829	-0.122467	-0.066829	-0.122467	-0.233744	-0.122467	-0.233744	-0.178105	-0.0111908	0.211362	0.0444475	0.489553	0.378277	0.267	0.322639	0.545192	0.990297	0.489553	0.378277	0.712106	0.60083	0.155724	0.100086
CDH16005_20161021_S_17B	M		R	0.0157509	0.0157509	0.165265	-0.183602	-0.133763	-0.0839253	0.0157509	0.065589	0.215103	-0.0340872	0.0157509	-0.183602	0.115427	0.115427	0.165265	0.514132	-0.183602	-0.0839253	0.215103	0.31478	-0.0839253	0.0157509	-0.133763	-0.23344	-0.133763	-0.283278	0.0157509	-0.0839253	-0.0839253	-0.133763	0.065589	-0.0340872	-0.0839253	-0.0340872	0.0157509	0.264941	0.663646	0.364618	0.514132	0.215103
CDH16005_20161021_S_17C	M	X	L	0.304482	0.304482	-0.0905005	-0.222161	-0.0905005	0.0411604	0.0411604	-0.0905005	0.238652	0.501973	0.436143	0.238652	0.567804	0.238652	0.436143	0.567804	0.0411604	0.238652	0.0411604	0.172821	-0.02467	-0.222161	-0.0905005	-0.0905005	-0.0905005	0.765295	1.48943	1.81858	0.106991	0.238652	0.0411604	0.0411604	-0.0905005	-0.222161	-0.222161	-0.222161	0.0411604	-0.156331	0.0411604	0.106991
CDH16005_20161021_S_17D	M		R	0.0340369	-0.0947156	-0.0303393	-0.0303393	-0.0303393	-0.159092	-0.0303393	-0.159092	0.355918	0.0984132	0.355918	-0.223468	0.0984132	0.16279	-0.0947156	-0.159092	-0.159092	-0.287845	0.291542	0.0340369	-0.0303393	0.0340369	-0.287845	-0.223468	-0.0947156	-0.159092	-0.287845	-0.159092	-0.0947156	-0.223468	0.0340369	-0.287845	0.0984132	0.227166	0.549047	0.420295	0.6778	0.484671	0.420295	0.291542
CDH16005_20161021_S_17E	M		L	-0.0209894	0.192492	0.0323808	0.139121	0.0323808	-0.287841	-0.0743597	0.139121	0.0323808	0.0857511	-0.23447	-0.0209894	0.192492	0.192492	0.192492	-0.0743597	0.299232	-0.0743597	0.139121	-0.1811	0.245862	0.0857511	-0.1811	0.0323808	-0.0209894	0.0323808	0.192492	0.512713	0.192492	0.0323808	0.0857511	0.0857511	-0.0743597	0.139121	0.512713	0.726194	0.245862	0.139121	0.0857511	0.139121
CDH16005_20161021_S_17F	M	X	L	0.236177	0.105279	-0.156518	-0.156518	0.105279	-0.156518	0.236177	-0.0256199	0.105279	0.105279	0.367075	0.105279	-0.0256199	-0.0256199	-0.156518	-0.0256199	-0.0256199	-0.156518	-0.0256199	0.105279	-0.0256199	-0.156518	-0.156518	-0.156518	0.105279	-0.156518	0.105279	0.236177	0.236177	0.105279	0.105279	0.105279	0.367075	0.367075	0.367075	-0.0256199	0.105279	0.105279	-0.0256199	-0.0256199
CDH16005_20161021_S_21A	M	X	R	0.207719	0.257529	0.0582876	-0.016428	-0.0662385	0.0333824	0.0582876	0.0333824	-0.190765	-0.190765	-0.016428	-0.116049	-0.0413333	-0.390006	-0.390006	-0.439817	-0.365101	-0.315291	-0.26548	-0.165859	-0.016428	-0.0911437	0.0582876	0.431866	0.406961	0.431866	0.00847718	-0.439817	-0.663964	-0.489627	-0.489627	-0.116049	-0.0662385	0.207719	0.133003	-0.0662385	-0.140954	-0.26548	-0.165859	-0.240575
CDH16005_20161021_S_21B	M	X	L	-0.0721757	-1.59399e-05	-0.168389	-0.120282	-0.120282	-1.59399e-05	-0.0481224	0.0961971	0.12025	-0.0481224	-0.0240692	0.168357	0.0480906	0.144304	0.19241	0.0961971	0.0480906	0.0721438	-0.0962289	0.12025	0.0721438	0.12025	0.456996	0.769688	0.962114	0.505102	0.288623	0.33673	-0.0721757	-0.0240692	0.288623	0.0721438	0.12025	0.384836	0.0240373	-0.0481224	-0.0721757	-0.144335	-1.59399e-05	-0.0962289
CDH16005_20161021_S_21C	M		L	-0.025175	-0.025175	0.0768707	0.0768707	-0.0761978	-0.025175	0.0258479	-0.178243	-0.127221	-0.127221	0.0768707	0.0258479	0.0258479	-0.127221	-0.025175	-0.178243	-0.178243	-0.178243	-0.127221	-0.0761978	-0.127221	0.0258479	0.0258479	0.331985	0.587099	0.485053	0.383008	0.331985	0.229939	0.280962	0.383008	0.485053	0.331985	0.127894	-0.127221	0.0768707	-0.178243	-0.127221	-0.178243	-0.178243
CDH16005_20161021_S_21D	M		L	0.0375291	0.17257	-0.18754	0.0375291	0.17257	0.217584	-0.00748459	0.262598	0.17257	0.217584	0.442653	0.17257	0.217584	-0.0975121	-0.0524983	-0.142526	-0.367594	-0.142526	-0.232553	-0.0524983	0.0375291	0.127557	0.127557	0.17257	-0.0524983	-0.00748459	0.0825429	-0.142526	0.0825429	-0.0524983	-0.0975121	0.0825429	0.352625	0.217584	-0.142526	0.0375291	-0.18754	-0.142526	-0.18754	-0.232553
CDH16005_20161021_S_25A	M	X	L	-0.057281	0.199359	0.142328	-0.142828	0.0852966	0.0567811	0.142328	0.113812	-0.057281	-0.0287654	0.0852966	0.0282656	-0.114312	0.0282656	0.199359	-0.057281	0.0282656	0.25639	0.0282656	-0.142828	0.0282656	0.284905	-0.0287654	0.370452	0.484514	0.484514	0.0567811	0.170843	0.113812	-0.114312	-0.342436	-0.0287654	-0.25689	0.0852966	0.199359	-0.0287654	-0.057281	-0.0287654	-0.171343	-0.370952
CDH16005_20161021_S_25B	M		L	-0.200413	-0.290424	-0.290424	-0.164409	-0.182411	-0.128405	-0.200413	-0.164409	-0.0383951	-0.362432	-0.290424	-0.380434	-0.398436	-0.632462	-0.560454	-0.578456	-0.560454	-0.61446	-0.542452	-0.43444	-0.43444	-0.380434	-0.380434	-0.506448	-0.272422	-0.110403	0.195631	0.53767	0.609678	0.645682	0.591676	0.645682	0.555672	0.231636	-0.0743991	-0.398436	-0.43444	-0.61446	-0.596458	-0.632462
CDH16005_20161021_S_25C	M		L	0.288369	0.494402	0.540188	0.608865	0.517295	0.56308	0.265477	0.265477	0.0136587	0.0136587	-0.169482	-0.32973	-0.0321265	-0.146589	-0.283945	-0.306837	-0.283945	-0.146589	-0.00923389	-0.123697	0.151014	-0.0321265	-0.146589	-0.0321265	-0.00923389	0.677543	1.22696	1.45589	1.70771	1.77639	1.82217	1.93663	1.68482	0.952254	0.47151	0.0594438	-0.123697	-0.261052	-0.306837	-0.306837
CDH16005_20161021_S_25D	M		L	-0.124163	-0.234099	-0.142486	-0.124163	-0.160808	0.114033	-0.215776	-0.10584	-0.234099	-0.0325492	-0.10584	-0.252422	-0.252422	-0.252422	-0.179131	-0.197454	-0.142486	0.0407416	0.0957098	-0.0142265	-0.0325492	0.0407416	-0.0325492	-0.0325492	-0.362358	-0.325713	-0.435649	-0.563908	-0.600553	-0.600553	-0.582231	-0.453972	-0.399004	-0.453972	-0.252422	-0.10584	-0.0875174	-0.0875174	-0.362358	-0.0875174
CDH16005_20161021_S_25E	M		L	0.675064	0.271401	0.553965	0.352133	0.513598	0.231035	0.109936	0.513598	0.271401	0.150302	0.150302	0.109936	-0.0918956	-0.212994	-0.212994	-0.0111631	-0.172628	0.0695695	0.150302	0.311767	0.634697	0.553965	0.796162	0.675064	0.553965	0.190668	0.271401	0.190668	0.271401	0.917261	0.876895	0.432866	0.231035	0.0695695	0.190668	0.0292032	-0.0918956	-0.0111631	-0.0515293	-0.0918956
CDH16005_20161021_S_31A	M	X	L	-0.140439	-0.0736206	0.160244	-0.00680223	-0.207257	-0.173848	-0.00680223	-0.0402114	-0.240667	-0.140439	-0.274076	-0.10703	0.293881	-0.0402114	0.160244	0.126835	0.260471	0.260471	0.527745	0.0934254	-0.0736206	0.193653	0.527745	0.394108	0.661382	0.694791	0.661382	0.227062	0.160244	0.0934254	0.126835	0.193653	0.0934254	-0.207257	-0.374303	-0.207257	-0.173848	0.0600162	0.0934254	0.293881
CDH16008_20161019_S_09A	M			0.0704619	0.0704619	0.399432	0.358311	0.111583	0.0704619	0.152704	-0.0529019	0.111583	0.0293406	0.0293406	-0.0940232	-0.176266	-0.135144	0.0704619	-0.217387	-0.0940232	0.0293406	0.111583	0.0293406	0.152704	0.440553	0.522796	0.64616	0.234947	0.605039	-0.176266	-0.217387	-0.258508	-0.258508	-0.176266	-0.340751	-0.176266	0.0293406	-0.135144	-0.0940232	-0.0529019	-0.0529019	0.234947	0.0293406
CDH16008_20161019_S_23A	M		L	0.230105	-0.0366771	-0.236764	0.0633663	0.0633663	0.16341	0.130062	0.0967141	0.330149	0.16341	0.230105	0.0633663	0.16341	0.230105	0.130062	-0.00332933	0.0300185	0.0300185	-0.0700249	-0.270112	0.0967141	-0.103373	-0.203416	-0.0366771	0.0633663	0.296801	0.430192	-0.236764	-0.136721	-0.336807	-0.00332933	0.130062	0.196757	-0.0700249	-0.303459	0.196757	0.0633663	-0.103373	-0.0700249	0.330149
CDH16010_20161025_S_01A	F	X	R	-0.292394	-0.00467318	-0.0526267	-0.00467318	-0.148534	-0.10058	0.0432803	-0.0526267	-0.00467318	-0.340348	-0.00467318	-0.10058	0.0912339	-0.244441	0.139187	0.0912339	0.0912339	0.187141	-0.10058	0.235094	0.0432803	0.426909	0.187141	0.235094	0.331001	0.235094	-0.148534	-0.292394	-0.532162	-0.340348	-0.00467318	-0.0526267	0.0912339	0.235094	-0.10058	0.522816	0.474862	0.762583	0.331001	0.474862
CDH16010_20161025_S_01B	F		R	-0.277884	-0.192313	-0.277884	-0.0211709	-0.192313	-0.192313	-0.192313	-0.106742	-0.0211709	-0.192313	0.0644002	-0.0211709	-0.106742	-0.192313	0.0644002	-0.0211709	-0.0211709	-0.192313	-0.106742	-0.106742	-0.0211709	-0.192313	0.149971	0.0644002	-0.192313	-0.106742	-0.277884	-0.277884	-0.192313	-0.277884	-0.277884	-0.0211709	-0.0211709	-0.192313	0.0644002	0.235543	0.235543	-0.106742	-0.0211709	-0.106742
CDH16010_20161025_S_05A	F	X	R	-0.185109	-0.281873	-0.314127	0.137438	0.0729283	-0.249618	-0.185109	-0.185109	-0.346382	-0.217363	-0.249618	-0.120599	-0.152854	0.0406737	-0.249618	0.0406737	0.137438	0.169692	-0.152854	0.234201	-0.0238356	-0.0560902	-0.152854	-0.0883448	-0.217363	-0.507655	-0.604419	-0.604419	-0.636673	-0.507655	-0.572164	-0.539909	-0.507655	-0.378636	-0.346382	-0.4754	-0.507655	-0.636673	-0.604419	-0.539909
CDH16010_20161025_S_05B	F	X	R	-0.258511	-0.198641	-0.198641	0.519797	0.0408384	0.0408384	-0.138771	0.160578	-0.0190315	0.100708	0.0408384	0.160578	-0.0190315	0.340188	0.220448	0.0408384	-0.0789013	-0.0190315	-0.138771	0.220448	-0.198641	-0.258511	-0.258511	-0.438121	-0.49799	-0.49799	-0.438121	-0.318381	0.280318	-0.0789013	-0.0789013	-0.438121	-0.258511	-0.438121	-0.378251	-0.378251	-0.198641	-0.318381	-0.318381	0.0408384
CDH16010_20161025_S_07A	F		L	-0.229588	-0.229588	-0.0453232	0.0283828	-0.119029	-0.155882	-0.155882	-0.0821761	-0.0821761	-0.155882	-0.155882	0.102089	-0.0453232	-0.0084702	-0.377	-0.303294	-0.192735	-0.266441	-0.303294	-0.192735	-0.413853	-0.340147	-0.303294	-0.155882	-0.0821761	-0.192735	-0.377	-0.450706	-0.450706	-0.229588	-0.487559	-0.450706	-0.229588	-0.303294	-0.561265	-0.561265	-0.450706	-0.524412	-0.487559	-0.413853
CDH16010_20161025_S_07B	F	X	R	0.0104789	0.0104789	0.0589358	-0.0864347	-0.377176	-0.0864347	-0.134892	0.30122	0.107393	0.155849	0.0104789	-0.0864347	-0.0379779	0.0589358	0.0104789	0.0104789	-0.328719	0.107393	-0.0864347	-0.134892	0.0589358	0.204306	0.107393	0.155849	-0.0379779	0.495047	0.931159	0.591961	0.107393	0.107393	0.688874	0.349677	0.398134	0.0104789	0.107393	-0.425632	0.0104789	-0.183348	-0.231805	-0.328719
CDH16010_20161025_S_11A	F	X	R	0.0878809	-0.448651	0.0342277	0.0342277	0.0342277	0.248841	-0.180385	0.141534	0.4098	-0.0194256	-0.0730788	-0.180385	0.0342277	0.0342277	-0.341345	0.0342277	-0.0194256	0.0342277	0.0878809	-0.287692	-0.180385	-0.180385	-0.234038	-0.0730788	-0.394998	-0.0194256	0.624413	0.785373	0.678066	0.678066	1.26825	0.302494	0.0878809	0.141534	-0.234038	-0.394998	0.0878809	-0.126732	0.141534	0.141534
CDH16010_20161025_S_13A	F		R	0.179844	-0.0224593	0.0449752	-0.0224593	0.247279	-0.0224593	0.179844	0.517017	-0.0224593	0.247279	0.0449752	-0.0224593	0.247279	-0.157328	0.247279	0.0449752	0.0449752	0.11241	-0.0224593	-0.157328	0.247279	0.0449752	-0.292197	-0.0898938	-0.0224593	0.0449752	0.0449752	0.11241	0.247279	0.11241	-0.0224593	0.651886	-0.224763	-0.157328	0.584451	0.314713	0.449582	-0.0224593	0.247279	0.247279
CDH16010_20161025_S_15A	F	X	L	-0.272586	-0.165791	-0.165791	0.0477997	-0.165791	-0.0589957	-0.165791	0.207993	-0.0589957	-0.272586	-0.325984	-0.219189	-0.325984	-0.219189	-0.325984	-0.379382	-0.219189	-0.112393	-0.325984	-0.272586	-0.379382	-0.486177	-0.432779	-0.219189	-0.486177	-0.486177	-0.325984	-0.379382	-0.325984	-0.486177	-0.325984	-0.379382	-0.325984	-0.432779	-0.539575	-0.325984	-0.379382	-0.272586	-0.272586	-0.432779
CDH16010_20161025_S_17A	F		R	-0.234995	-0.18838	-0.281609	-0.141766	-0.18838	-0.328224	-0.18838	-0.374838	-0.374838	-0.328224	-0.328224	-0.234995	-0.00192303	-0.0485374	-0.328224	-0.18838	-0.281609	-0.374838	-0.421452	-0.18838	-0.18838	-0.328224	-0.18838	-0.0951518	0.0446913	-0.141766	-0.0951518	0.277763	0.231149	-0.141766	-0.281609	0.0446913	-0.141766	-0.00192303	-0.328224	-0.18838	-0.00192303	-0.0951518	-0.0951518	-0.141766
CDH16010_20161025_S_17B	F	X	R	-0.0508037	0.144473	0.0273071	0.0663625	-0.0898591	-0.0898591	0.144473	0.0663625	0.144473	-0.16797	-0.0117483	0.0273071	-0.207025	-0.16797	-0.0117483	0.26164	-0.0117483	-0.0117483	-0.128915	-0.0508037	0.0663625	0.105418	0.0663625	0.0273071	0.26164	0.300695	0.0663625	-0.207025	-0.246081	-0.402302	-0.285136	-0.128915	-0.128915	-0.0898591	-0.0898591	0.222584	0.26164	0.417861	0.417861	0.535028
CDH16010_20161025_S_21A	F	X	R	-0.060611	-0.15434	-0.185583	-0.216826	-0.123097	-0.091854	-0.185583	-0.341798	-0.248069	-0.341798	-0.310555	-0.15434	-0.185583	-0.341798	-0.373041	-0.46677	-0.216826	-0.15434	-0.435527	-0.373041	-0.310555	-0.373041	-0.404284	0.0331181	-0.029368	0.189333	-0.435527	-0.15434	-0.248069	-0.373041	0.15809	-0.216826	0.0956041	-0.15434	-0.622985	-0.529256	-0.435527	-0.123097	-0.404284	-0.060611
CDH16010_20161025_S_21B	F	X	R	0.378207	-0.132521	0.19795	0.648593	0.227993	0.0477363	-0.0123494	0.137865	-0.0423922	0.167908	0.227993	0.0176934	0.227993	0.167908	0.0777791	0.348164	0.0777791	-0.222649	-0.162563	-0.372863	-0.162563	-0.372863	-0.34282	-0.643249	-0.673291	-0.883591	-0.613206	-0.76342	-0.493035	-0.312778	-0.192606	0.0176934	-0.432949	-0.312778	-0.282735	-0.132521	0.137865	0.558464	0.528421	0.258036
CDH16010_20161025_S_23A	F	X	R	0.346712	0.502655	0.3779	0.502655	0.440277	0.502655	0.440277	0.471466	0.59622	0.689786	0.471466	0.502655	0.752164	0.346712	0.752164	0.59622	0.409089	0.876918	0.59622	0.533843	0.627409	0.284334	0.409089	0.00363669	-0.339438	-0.620136	-0.620136	-0.0899292	0.471466	0.471466	0.0660139	-0.121118	-0.245872	-0.52657	-0.776079	-0.713702	-0.74489	-0.588947	-0.495381	-0.433004
CDH16010_20161025_S_23B	F	X	R	0.278046	0.278046	0.199116	0.278046	0.317511	0.593766	0.278046	0.672696	0.554301	0.396441	0.751626	0.791091	0.791091	0.870021	1.02788	0.751626	1.22521	0.948951	1.54093	1.58039	1.38307	1.65932	0.791091	0.870021	0.356976	0.199116	-0.156069	-0.471788	-0.590183	-0.708578	-0.550718	-0.195534	-0.0376736	-0.234998	-0.313928	-0.195534	-0.195534	-0.234998	-0.392858	-0.511253
CDH16010_20161025_S_23C	F		R	0.00163126	0.0679885	-0.064726	-0.19744	-0.263798	-0.0979046	-0.330155	-0.064726	-0.131083	-0.230619	-0.19744	-0.19744	-0.429691	-0.0315474	-0.064726	-0.131083	-0.230619	0.0679885	0.101167	-0.064726	0.233882	0.26706	0.300239	0.200703	0.333417	0.0679885	-0.263798	-0.164262	0.00163126	-0.19744	-0.0315474	0.26706	0.632025	0.930632	0.864275	0.632025	-0.0315474	-0.164262	-0.396512	-0.164262
CDH16010_20161025_S_23D	F	X	L	-0.0891657	-0.389361	-0.00339559	0.12526	-0.132051	0.0394895	-0.174936	-0.132051	-0.0462807	0.38257	-0.0891657	0.38257	0.0394895	0.168145	-0.00339559	0.2968	0.339685	0.0394895	0.168145	-0.0462807	0.2968	0.339685	0.253915	0.0823745	-0.0891657	0.0823745	0.46834	0.72565	0.46834	0.63988	0.425455	0.38257	0.0394895	-0.132051	-0.132051	0.12526	0.425455	0.168145	0.0823745	-0.217821
CDH16010_20161025_S_25A	F	X	R	-0.136453	-0.225061	-0.00354115	-0.136453	-0.225061	-0.269365	-0.402278	-0.225061	-0.180757	-0.225061	-0.269365	-0.0921492	-0.313669	-0.0478452	-0.180757	-0.313669	-0.225061	-0.269365	-0.357974	-0.357974	-0.313669	-0.225061	-0.490886	-0.579494	-0.579494	-0.357974	-0.579494	-0.668102	-0.75671	-0.712406	-0.75671	-0.53519	-0.712406	-0.53519	-0.579494	-0.357974	-0.357974	-0.136453	-0.180757	-0.225061
CDH16010_20161025_S_25B	F	X	L	-0.0640337	0.112754	-0.0198367	0.245345	0.0685573	-0.152428	0.245345	0.245345	0.333739	0.201148	-0.0198367	0.0243603	0.156951	0.156951	0.245345	0.201148	0.598922	0.598922	0.687316	1.52706	1.96903	2.54359	3.11815	3.47173	2.98556	2.54359	1.04089	-0.0640337	-0.196625	0.245345	1.12929	1.08509	1.39447	1.17348	0.687316	0.156951	-0.0198367	-0.0640337	0.201148	0.0243603
CDH16010_20161025_S_25C	F	X	R	0.113758	0.0753013	-0.309262	-0.0785239	-0.0400676	-0.232349	-0.193893	-0.00161126	-0.0785239	-0.11698	-0.00161126	-0.00161126	-0.00161126	-0.155436	-0.11698	-0.155436	-0.155436	-0.0785239	-0.11698	-0.0400676	-0.0400676	-0.309262	-0.0400676	-0.347718	0.306039	-0.0400676	-0.11698	-0.463087	-0.193893	-0.386174	-0.11698	0.421408	0.652146	0.382952	-0.0785239	-0.155436	0.036845	0.0753013	0.113758	-0.309262
CDH16010_20161025_S_25D	F	X	L	-0.353356	-0.353356	-0.307824	-0.353356	-0.171229	-0.21676	-0.489951	-0.444419	-0.398887	-0.489951	-0.398887	-0.444419	-0.444419	-0.535482	-0.398887	-0.444419	-0.489951	-0.353356	-0.489951	-0.444419	-0.398887	-0.398887	-0.171229	-0.489951	-0.21676	0.0108982	0.32962	-0.0801652	-0.353356	-0.444419	-0.398887	-0.353356	-0.21676	-0.489951	-0.444419	-0.398887	-0.489951	-0.535482	-0.398887	-0.353356
CDH16010_20161025_S_25E	F		R	0.0893176	-0.210004	-0.295524	-0.295524	-0.381044	-0.210004	-0.295524	-0.167243	-0.295524	-0.0817231	-0.295524	-0.210004	-0.0389629	0.0465574	0.00379725	-0.210004	0.0465574	-0.0817231	-0.167243	-0.423804	-0.0389629	0.0465574	-0.210004	0.0893176	0.0893176	0.00379725	-0.466565	-0.466565	-0.252764	-0.0389629	1.0728	1.0728	1.45764	0.859001	0.431399	0.303118	0.60244	0.345879	-0.0389629	-0.124483
CDH16010_20161025_S_27A	F	X	R	0.451209	0.301601	0.700557	0.40134	0.800296	0.102123	0.451209	0.251731	0.700557	0.201862	0.151992	0.151992	0.301601	0.600818	0.900035	0.600818	1.19925	0.40134	1.09951	0.40134	0.600818	0.501079	0.40134	-0.0474858	0.151992	-0.197094	-0.197094	-0.147225	-0.246964	-0.197094	0.0023837	-0.197094	-0.0973553	0.0522532	0.102123	0.0522532	0.600818	0.850165	0.800296	0.850165
CDH16010_20161025_S_27B	F	X	L	0.425973	0.305074	0.90957	0.425973	0.184174	0.385673	0.385673	0.546872	0.345373	0.667771	0.466272	0.86927	0.466272	0.425973	0.224474	0.305074	0.546872	0.466272	0.708071	0.708071	0.627471	1.03047	0.506572	0.305074	0.0229754	-0.138224	-0.0173244	-0.218823	0.345373	0.86927	0.0632751	0.264774	0.0632751	-0.0979239	-0.541221	-0.420322	-0.138224	-0.0576241	0.305074	0.587172
CDH16010_20161025_S_27C	F	X	R	0.170992	0.121519	-0.22479	-0.125845	-0.274263	0.0720462	-0.125845	-0.422682	-0.323736	-0.22479	-0.0763721	-0.274263	-0.22479	-0.323736	0.170992	-0.0268993	-0.0763721	0.0225734	-0.0268993	-0.125845	-0.125845	0.121519	0.170992	0.170992	-0.0268993	-0.422682	-0.521627	-0.0268993	-0.125845	0.0225734	0.0720462	-0.0763721	-0.22479	-0.175318	-0.274263	-0.175318	-0.175318	0.220465	0.467829	0.31941
CDH16010_20161025_S_27D	F		R	-0.0700437	0.107089	0.343267	-0.0700437	-0.0109993	-0.129088	0.402311	0.225178	0.343267	0.225178	0.284222	0.284222	0.402311	0.166134	0.284222	0.284222	-0.188132	-0.188132	-0.247177	0.166134	0.107089	-0.247177	-0.0109993	-0.306221	-0.247177	-0.306221	-0.247177	-0.306221	-0.247177	-0.188132	-0.129088	-0.129088	-0.306221	-0.306221	-0.188132	-0.129088	0.048045	-0.0109993	-0.0700437	-0.188132
CDH16010_20161025_S_27E	F	X	R	0.0181553	-0.213206	-0.136085	-0.136085	0.172396	0.0181553	-0.0975251	0.249516	0.133836	-0.0204049	-0.213206	-0.136085	-0.136085	-0.251766	0.0567154	0.0181553	-0.251766	-0.328886	-0.174645	-0.174645	0.0181553	-0.328886	-0.136085	-0.0204049	0.172396	0.288076	0.905038	1.522	1.59912	1.56056	1.21352	0.750798	0.365197	0.210956	-0.290326	-0.444566	-0.367446	-0.213206	-0.251766	0.0567154
CDH16010_20161025_S_29A	F		R	0.0696162	-0.395981	0.0696162	-0.0855829	0.0308164	-0.163182	0.108416	-0.163182	0.0308164	-0.201982	-0.279582	-0.0467831	-0.201982	-0.124383	-0.163182	-0.395981	-0.201982	-0.318382	-0.395981	-0.357181	0.0308164	0.108416	-0.279582	-0.357181	0.0308164	-0.0467831	0.108416	-0.434781	-0.00798336	-0.318382	-0.473581	-0.357181	-0.279582	-0.51238	-0.434781	-0.395981	-0.357181	-0.55118	-0.58998	-0.395981
CDH16010_20161025_S_29B	F	X	L	-0.0639777	-0.186279	0.455804	-0.0334023	-0.216855	0.333502	0.15005	0.486379	0.119475	0.394653	0.486379	-0.0334023	0.211201	0.241776	0.486379	0.364078	0.241776	0.394653	0.302927	0.761558	0.0583239	0.211201	-0.094553	-0.186279	-0.461458	-0.430882	-0.369732	-0.308581	0.425229	0.516955	0.364078	0.700407	0.0277485	-0.125128	-0.614335	-0.614335	-0.553184	-0.0639777	0.0277485	-0.186279
CDH16011_20161027_S_09A	F	X	L	0.245336	0.125057	0.0448718	0.0448718	0.405707	0.405707	0.16515	0.325522	0.16515	0.566078	0.566078	0.485893	0.16515	0.766542	0.0448718	0.245336	0.245336	0.4458	0.566078	0.566078	0.646264	0.16515	0.325522	0.646264	0.525986	0.125057	-0.115499	-0.476335	-0.396149	-0.436242	-0.436242	-0.476335	-0.396149	-0.195685	-0.396149	0.00477901	-0.0353138	-0.0754066	0.0849646	-0.115499
CDH16011_20161027_S_15A	F	X	L	0.278877	0.256431	0.458442	0.301323	0.346214	0.189094	0.413551	0.435997	0.346214	0.435997	0.189094	0.144203	-0.125145	-0.125145	-0.147591	-0.304711	-0.0129168	-0.170036	-0.394493	-0.282265	-0.259819	-0.394493	-0.304711	-0.192482	-0.0129168	0.00952891	-0.0578081	-0.372048	-0.304711	-0.439385	-0.0802538	0.278877	0.840019	1.51339	1.19915	0.929802	1.44605	1.28893	1.06448	0.750236
CDH16011_20161027_S_29A	F	X	R	-0.00945928	0.106829	0.164973	0.281262	-0.00945928	-0.125748	0.0486849	0.164973	-0.125748	0.106829	-0.00945928	0.0486849	0.0486849	0.0486849	0.164973	-0.30018	-0.0676035	-0.0676035	0.0486849	-0.242036	-0.183892	-0.242036	-0.183892	-0.0676035	-0.00945928	-0.0676035	-0.0676035	-0.242036	-0.30018	-0.183892	-0.30018	-0.125748	-0.0676035	0.164973	-0.00945928	0.455694	-0.242036	0.0486849	0.0486849	0.164973
CDH16011_20161027_S_31A	F	X	L	0.120895	0.120895	0.120895	0.270375	0.195635	-0.103325	0.0461548	0.0461548	0.0461548	0.120895	0.270375	0.0461548	-0.178065	-0.0285852	0.0461548	0.0461548	-0.327545	-0.103325	-0.103325	-0.0285852	0.195635	-0.0285852	0.270375	0.0461548	0.718815	0.419855	0.718815	1.76517	1.16725	1.54095	1.09251	1.16725	0.644075	0.195635	0.419855	0.0461548	0.195635	-0.103325	-0.103325	-0.178065
CDH169019_20161018_S_01A	M	X	R	-0.0233219	-0.109033	-0.151888	0.0623891	0.0409614	-0.173316	-0.0876051	-0.0661774	0.0195336	0.0195336	0.126672	0.0195336	0.0623891	0.0409614	-0.0233219	-0.151888	0.190956	0.105245	0.1481	0.0195336	-0.0233219	-0.109033	-0.130461	-0.151888	-0.173316	-0.194744	-0.109033	-0.301883	-0.151888	0.0623891	-0.0447496	0.0195336	0.126672	-0.237599	-0.259027	-0.280455	-0.216172	-0.259027	0.0195336	-0.0233219
CDH169019_20161018_S_03A	M	X	R	0.0214218	0.0214218	0.101182	0.0214218	0.0613019	0.101182	-0.0184584	-0.0583385	-0.138099	-0.0982186	-0.0982186	-0.0982186	-0.217859	-0.138099	-0.177979	-0.217859	-0.257739	-0.377379	-0.257739	-0.337499	-0.417259	-0.377379	-0.45714	-0.337499	-0.45714	-0.377379	-0.45714	-0.417259	-0.417259	-0.337499	-0.217859	0.180942	0.141062	0.380343	0.340463	0.300583	0.260702	0.0613019	0.539863	0.619623
CDH169019_20161018_S_05A	M	X	L	0.081181	-0.0799828	0.081181	-0.176681	0.081181	-0.0155173	0.145647	-0.04775	0.30681	0.274578	0.0489483	0.274578	0.0489483	0.0489483	-0.0155173	-0.04775	-0.0799828	-0.112216	-0.337845	-0.40231	-0.241147	-0.305612	-0.112216	-0.241147	-0.144448	-0.0799828	-0.112216	-0.466776	-0.273379	-0.0155173	-0.305612	0.145647	0.758069	1.01593	0.629138	0.661371	0.854767	0.919233	0.854767	0.596905
CDH169019_20161018_S_09A	M	X	R	0.205958	0.0114723	-0.155229	-0.0163113	-0.155229	-0.127446	-0.0440949	-0.0996622	-0.488633	-0.349715	-0.266364	-0.294148	-0.433066	-0.433066	-0.349715	-0.294148	-0.294148	-0.405282	-0.23858	-0.571984	-0.488633	-0.46085	-0.655335	-0.349715	-0.488633	-0.433066	-0.46085	-0.5442	-0.599768	-0.377499	-0.23858	-0.349715	-0.516417	-0.516417	-0.627551	-0.571984	-0.5442	-0.627551	-0.488633	-0.433066
CDH169019_20161018_S_09B	M	X	L	-0.168884	-0.168884	-0.392779	-0.264839	-0.0729284	-0.232854	-0.296824	-0.168884	-0.104913	-0.104913	0.0550118	-0.264839	0.182952	-0.200869	-0.264839	-0.00895829	-0.328809	-0.328809	-0.552704	-0.424764	-0.456749	-0.552704	-0.296824	-0.520719	-0.520719	-0.360794	-0.520719	-0.616674	-0.616674	-0.552704	-0.680644	-0.456749	-0.648659	-0.552704	-0.680644	-0.456749	-0.328809	-0.0729284	0.150967	0.534788
CDH169019_20161018_S_09C	M	X	L	-0.234231	-0.00433513	-0.119283	0.0186544	0.24855	0.179581	0.0646335	0.110613	-0.0733038	-0.0273247	0.179581	0.22556	0.0876231	0.041644	0.156592	0.0186544	-0.0733038	-0.0733038	0.0186544	-0.0962933	-0.0503142	-0.142272	-0.349178	-0.395158	-0.418147	-0.441137	-0.395158	-0.533095	-0.418147	-0.395158	-0.303199	-0.28021	-0.188252	-0.464126	-0.0503142	-0.188252	0.0646335	0.110613	0.179581	0.317519
CDH169019_20161018_S_21A	M	X	R	-0.16482	-0.134589	0.0770305	-0.104357	-0.074126	-0.0136634	-0.16482	0.0165679	-0.0438947	-0.104357	-0.0438947	-0.0438947	-0.0136634	-0.0438947	0.0165679	0.0165679	0.107262	0.0770305	0.28865	0.137493	0.167724	0.349112	0.621194	0.590963	0.28865	0.0467992	0.197956	0.137493	0.107262	-0.16482	-0.285745	-0.376439	-0.436902	-0.497364	-0.315976	-0.285745	-0.346208	-0.255514	-0.255514	-0.315976
CDH169019_20161018_S_25A	M	X	L	0.0717476	-0.154057	0.207231	-0.0185744	-0.0185744	-0.108896	-0.108896	-0.154057	-0.0637354	-0.0637354	0.0717476	-0.0185744	0.297553	0.342714	0.478197	0.387875	0.342714	0.387875	0.342714	0.433036	0.252392	0.61368	0.207231	0.342714	0.0265866	-0.154057	-0.199218	0.0265866	-0.24438	0.0717476	0.16207	0.116909	0.0717476	0.297553	0.207231	0.658841	0.342714	0.523358	0.297553	0.478197
EMR17001_20170705_S_03A	F	X	L	0.598108	0.324922	0.402975	0.0517366	0.481028	0.520055	0.207843	0.676161	0.168816	0.168816	0.402975	0.402975	0.520055	0.246869	0.168816	0.402975	0.324922	0.442002	0.442002	0.676161	0.559081	0.324922	0.442002	0.481028	0.285896	0.637134	0.637134	0.91032	0.520055	0.949346	0.715187	0.676161	0.207843	0.363949	0.207843	0.0907631	0.246869	0.0907631	-0.0263164	-0.0653429
EMR17001_20170705_S_07A	F	X	L	0.0590376	0.126531	0.261517	0.126531	0.396504	0.733969	0.126531	0.396504	0.126531	0.32901	0.0590376	0.32901	0.53149	0.0590376	0.396504	0.32901	0.194024	0.666476	0.53149	0.32901	0.0590376	0.396504	0.0590376	0.0590376	-0.210935	-0.143442	-0.0759488	-0.0759488	0.194024	0.32901	-0.210935	0.126531	-0.00845561	-0.143442	-0.210935	-0.210935	-0.143442	0.194024	-0.0759488	-0.00845561
EMR17001_20170705_S_07B	F		R	-0.128805	-0.0359745	0.149687	-0.221636	0.0568562	-0.0359745	-0.128805	-0.0359745	-0.221636	0.0568562	-0.128805	0.0568562	0.149687	0.0568562	-0.221636	0.0568562	-0.128805	-0.0359745	-0.128805	-0.128805	-0.221636	-0.221636	-0.128805	-0.221636	-0.128805	-0.0359745	-0.128805	-0.128805	-0.128805	-0.221636	-0.128805	-0.128805	-0.221636	-0.221636	-0.221636	-0.221636	-0.128805	-0.128805	0.0568562	0.149687
EMR17001_20170705_S_09A	F	X	L	-2.56674e-05	-0.0585194	-2.56674e-05	-0.117013	0.409431	0.175456	0.233949	0.175456	0.584912	0.526418	0.292443	0.350937	0.233949	0.233949	0.526418	0.467924	0.526418	0.526418	0.409431	-2.56674e-05	-0.175507	-0.234001	-0.234001	-0.234001	-0.175507	-0.175507	-0.234001	-0.234001	-0.175507	-0.234001	-0.234001	-0.234001	-0.234001	-0.234001	-0.234001	-0.234001	-0.234001	-0.234001	-0.234001	-0.175507
EMR17001_20170705_S_09B	F	X	L	-0.00484329	-0.00484329	0.0896693	-0.00484329	0.184182	-0.00484329	0.0896693	-0.193868	-0.0993559	-0.00484329	-0.0993559	0.0896693	0.0896693	-0.193868	-0.00484329	0.278695	-0.0993559	0.0896693	0.184182	-0.0993559	-0.0993559	-0.0993559	0.184182	-0.0993559	0.184182	-0.0993559	0.184182	-0.0993559	0.0896693	0.0896693	0.0896693	-0.193868	0.0896693	-0.193868	-0.0993559	-0.00484329	-0.193868	-0.193868	-0.193868	-0.00484329
EMR17001_20170705_S_11A	F		L	-0.095201	0.00724521	0.00724521	0.109691	0.314584	0.109691	0.109691	0.109691	0.00724521	-0.095201	0.212138	0.00724521	0.314584	0.00724521	-0.095201	0.314584	0.109691	0.212138	0.00724521	0.00724521	-0.197647	-0.197647	0.519476	0.00724521	0.00724521	0.314584	0.109691	0.314584	-0.095201	0.314584	0.212138	0.41703	0.109691	0.41703	0.00724521	0.109691	-0.095201	0.00724521	0.00724521	0.00724521
EMR17001_20170705_S_15A	F	X		-0.444552	-0.444552	-0.444552	-0.444552	-0.444552	-0.444552	-0.444552	-0.444552	-0.444552	-0.444552	-0.444552	-0.444552	-0.444552	-0.444552	-0.444552	-0.444552	-0.444552	-0.444552	-0.444552	-0.444552	-0.444552	-0.444552	-0.444552	-0.444552	-0.444552	-0.444552	-0.444552	-0.444552	-0.444552	-0.444552	-0.444552	-0.444552	-0.444552	-0.444552	-0.444552	-0.444552	-0.365075	-0.404814	-0.444552	-0.444552
EMR17001_20170705_S_15B	F			-0.159794	-0.159794	-0.159794	-0.159794	-0.159794	-0.159794	-0.159794	-0.12792	-0.159794	-0.159794	-0.159794	-0.12792	-0.159794	-0.159794	-0.159794	-0.12792	-0.159794	-0.159794	-0.159794	-0.159794	-0.159794	-0.159794	-0.159794	-0.159794	-0.159794	-0.159794	-0.159794	-0.159794	-0.159794	-0.159794	-0.159794	-0.159794	-0.159794	-0.159794	-0.159794	-0.159794	-0.159794	-0.159794	-0.159794	-0.159794
EMR17001_20170705_S_15C	F	X	R	-0.149083	-0.0103587	-0.260062	-0.121338	-0.0381036	-0.260062	-0.176828	-0.0658484	-0.121338	-0.204573	-0.176828	-0.149083	-0.260062	-0.232318	-0.343297	-0.371042	-0.398787	-0.343297	-0.343297	-0.343297	-0.343297	-0.287807	-0.371042	-0.315552	-0.343297	-0.232318	-0.204573	-0.149083	-0.0935933	-0.0381036	-0.176828	-0.0381036	-0.0935933	-0.0658484	-0.204573	-0.260062	-0.232318	-0.371042	-0.260062	-0.343297
EMR17001_20170705_S_17A	F	X	L	0.116073	0.0441322	0.619659	0.295925	0.331896	0.0801026	0.547718	0.152043	0.0441322	-0.207661	0.331896	0.0441322	0.259955	0.223984	0.259955	0.583689	0.152043	0.188014	0.403837	-0.279602	0.116073	0.0801026	0.223984	0.331896	0.259955	0.0801026	0.188014	-0.0278087	0.439807	0.475777	0.403837	0.403837	0.152043	0.116073	0.116073	-0.0997495	-0.0278087	0.259955	-0.0997495	-0.0997495
EMR17001_20170705_S_17B	F		L	-0.136201	0.0035433	-0.136201	-0.136201	-0.136201	-0.043038	0.096706	-0.229363	-0.182782	0.0501246	0.0501246	-0.275945	-0.043038	-0.136201	-0.182782	-0.0896194	-0.322526	-0.136201	-0.275945	-0.136201	-0.275945	-0.275945	-0.229363	-0.043038	-0.136201	-0.369107	-0.043038	-0.136201	-0.0896194	0.0035433	-0.0896194	-0.136201	-0.275945	-0.136201	0.0035433	0.0035433	-0.136201	-0.182782	-0.182782	-0.322526
EMR17001_20170705_S_21A	F	X	L	0.413611	0.349236	0.477986	0.0595509	0.477986	0.574548	0.606735	0.477986	0.510173	0.832046	0.638922	0.574548	0.638922	0.54236	0.703297	0.574548	0.703297	0.767671	0.799859	0.54236	0.413611	0.445798	0.477986	0.317049	0.284862	0.381424	0.445798	0.477986	0.381424	0.477986	0.445798	1.02517	1.05736	1.08954	1.25048	0.799859	1.25048	0.960795	0.992982	1.05736
EMR17001_20170705_S_21B	F		L	-0.0943859	-0.130446	-0.058326	-0.0943859	-0.130446	0.0859135	0.0859135	0.0498536	0.194093	0.338333	-0.058326	0.0859135	-0.058326	-0.130446	0.0498536	-0.0943859	-0.0943859	-0.0222661	0.0498536	0.158033	0.230153	0.0137938	-0.058326	0.0859135	0.121973	0.0137938	-0.0943859	-0.130446	-0.130446	0.0137938	-0.0222661	0.0859135	0.0859135	0.302273	0.0498536	0.662872	0.410453	-0.0222661	-0.058326	0.0859135
EMR17001_20170705_S_23A	F	X	R	-0.0031049	0.0259685	-0.0321783	-0.206618	-0.0612516	0.0550418	-0.0321783	-0.0321783	-0.0031049	-0.119398	-0.119398	-0.264765	-0.0321783	0.113189	-0.206618	-0.119398	-0.177545	-0.177545	-0.090325	-0.148472	-0.148472	-0.148472	-0.264765	-0.206618	-0.235692	-0.090325	-0.235692	-0.119398	-0.148472	-0.206618	-0.177545	-0.090325	-0.322912	-0.0321783	-0.148472	-0.148472	0.200409	-0.206618	-0.090325	-0.119398
EMR17001_20170705_S_23B	F	X	L	0.0285611	-0.0618196	-0.0618196	0.164132	0.164132	0.0737514	-0.0618196	0.164132	0.164132	-0.0618196	0.118942	0.0285611	0.0285611	0.209322	-0.0166293	0.0737514	-0.1522	-0.0618196	0.0737514	0.118942	-0.0166293	-0.197391	0.0737514	0.299703	0.254513	-0.1522	0.0737514	0.0285611	0.209322	0.209322	0.118942	-0.1522	-0.10701	-0.0618196	-0.242581	-0.242581	-0.1522	0.164132	-0.242581	-0.1522
EMR17001_20170705_S_23C	F	X	R	-0.0341409	-0.0083831	0.0173747	-0.0341409	0.0173747	-0.137172	-0.0083831	0.0173747	0.120406	0.0173747	0.0431324	-0.0341409	-0.0083831	-0.16293	0.0688902	-0.0083831	-0.0083831	0.0431324	-0.0083831	0.171921	0.0173747	0.0173747	-0.240203	-0.111414	-0.137172	-0.16293	-0.0856564	-0.0598986	-0.0598986	-0.0341409	-0.188687	-0.188687	-0.188687	-0.214445	-0.188687	-0.0856564	-0.188687	-0.0856564	-0.188687	-0.0598986
EMR17001_20170705_S_25A	F			-0.102061	-0.102061	-0.102061	-0.102061	-0.102061	-0.0129634	-0.102061	-0.102061	-0.0129634	-0.0129634	-0.102061	-0.102061	-0.102061	-0.102061	-0.102061	-0.102061	-0.102061	-0.102061	-0.102061	-0.102061	-0.102061	-0.102061	-0.102061	-0.102061	-0.102061	-0.102061	-0.102061	-0.102061	-0.102061	-0.102061	-0.102061	-0.0129634	-0.102061	-0.0129634	-0.102061	-0.102061	0.0761344	-0.0129634	-0.0129634	-0.102061
EMR17001_20170705_S_25B	F	X	R	-0.0888181	-0.0141804	-0.0888181	-0.0141804	0.0231384	0.0231384	0.135095	0.0231384	0.0604573	0.0977761	0.0977761	0.172414	-0.0514992	0.135095	0.135095	-0.200775	0.0604573	0.135095	-0.0141804	-0.0514992	0.0231384	-0.0141804	-0.0888181	-0.0141804	-0.0888181	-0.0514992	-0.0141804	-0.0141804	-0.0888181	0.0231384	-0.126137	0.0977761	-0.0888181	0.0977761	0.0231384	-0.126137	0.135095	0.247051	0.0604573	0.0604573
EMR17001_20170705_S_25C	F	X	L	0.247029	0.314178	0.179881	0.247029	0.179881	0.112733	0.112733	0.314178	-0.122285	0.0791592	-0.122285	0.280604	0.58277	0.381326	0.112733	0.280604	0.280604	-0.055137	0.213455	0.146307	0.0791592	0.179881	0.146307	-0.0887111	0.0120111	-0.0887111	-0.055137	-0.0887111	-0.323729	-0.256581	-0.189433	-0.390878	-0.323729	-0.021563	-0.055137	-0.223007	-0.021563	0.0455851	0.213455	0.247029
EMR17001_20170705_S_25D	F	X	L	0.183398	0.384962	0.102772	0.0624591	0.384962	0.143085	0.304337	0.143085	0.183398	0.0221462	0.183398	0.264024	0.0221462	0.425275	0.143085	-0.0584796	0.0221462	0.102772	0.0221462	0.0624591	0.0624591	0.183398	0.384962	0.505901	0.546214	0.264024	0.425275	0.0624591	0.465588	0.143085	0.183398	0.0624591	-0.139105	-0.34067	0.223711	-0.0987925	-0.139105	-0.0584796	-0.0987925	0.0624591
EMR17001_20170705_S_25E	F		L	-0.175495	0.0409367	-0.0131713	-0.0672794	-0.229604	0.149153	-0.0131713	-0.229604	0.0409367	-0.121387	-0.0672794	0.257369	-0.121387	-0.0672794	-0.175495	-0.0672794	-0.121387	0.257369	0.0409367	-0.0672794	-0.121387	0.149153	-0.0131713	0.203261	0.149153	0.365585	0.0409367	0.203261	0.203261	0.0409367	0.0950448	0.690233	0.527909	0.203261	-0.0131713	-0.175495	-0.0672794	-0.283712	-0.0672794	-0.0672794
EMR17001_20170705_S_27A	F			-0.103357	-0.103357	-0.103357	-0.103357	-0.103357	-0.103357	-0.103357	-0.103357	-0.103357	-0.103357	-0.103357	-0.103357	-0.103357	-0.103357	-0.103357	-0.103357	-0.103357	-0.103357	-0.103357	-0.103357	-0.103357	-0.103357	-0.103357	-0.103357	-0.103357	-0.103357	-0.103357	-0.103357	-0.103357	-0.103357	-0.103357	-0.103357	-0.103357	-0.103357	-0.103357	-0.103357	-0.103357	-0.103357	-0.103357	-0.103357
EMR17001_20170705_S_27B	F		L	-0.137065	-0.137065	-0.000364508	-0.137065	-0.000364508	0.273036	0.136336	-0.000364508	-0.137065	-0.137065	-0.137065	-0.137065	-0.000364508	-0.000364508	-0.000364508	-0.137065	-0.137065	-0.000364508	-0.000364508	-0.137065	-0.137065	-0.137065	-0.137065	-0.000364508	-0.000364508	-0.000364508	-0.000364508	-0.137065	-0.137065	0.136336	-0.137065	0.273036	-0.137065	-0.137065	-0.000364508	0.136336	-0.000364508	-0.137065	-0.137065	-0.137065
EMR17001_20170705_S_27C	F	X	L	0.15065	-0.010443	0.231197	0.15065	0.231197	0.472837	0.231197	0.39229	0.311744	0.311744	0.231197	0.63393	-0.010443	0.311744	-0.010443	0.472837	0.15065	0.15065	0.39229	0.231197	0.231197	0.553383	0.472837	0.472837	0.311744	0.39229	0.553383	0.63393	0.311744	0.311744	0.15065	0.15065	0.311744	0.39229	-0.0909897	0.231197	0.311744	0.15065	0.311744	-0.0909897
EMR17001_20170705_S_27D	F			-0.0859141	-0.0859141	-0.0859141	-0.0859141	-0.0859141	0.0914903	-0.0859141	-0.0859141	-0.0859141	-0.0859141	-0.0859141	-0.0859141	-0.0859141	-0.0859141	-0.0859141	-0.0859141	-0.0859141	-0.0859141	-0.0859141	-0.0859141	-0.0859141	-0.0859141	-0.0859141	-0.0859141	-0.0859141	-0.0859141	-0.0859141	-0.0859141	-0.0859141	-0.0859141	-0.0859141	-0.0859141	-0.0859141	-0.0859141	-0.0859141	-0.0859141	-0.0859141	-0.0859141	-0.0859141	-0.0859141
EMR17001_20170705_S_29A	F	X	L	0.105969	0.195008	0.506644	0.239528	0.105969	0.06145	0.239528	0.506644	0.328567	0.551164	0.417606	0.195008	0.373086	0.150489	0.105969	0.417606	0.06145	0.373086	0.239528	0.417606	0.105969	0.328567	0.462125	0.417606	0.373086	0.640203	0.417606	0.328567	0.595683	0.506644	0.506644	0.105969	0.239528	0.06145	-0.0275888	-0.116628	-0.0721083	-0.161147	-0.0275888	-0.116628
EMR17001_20170705_S_31A	F	X	L	0.278647	0.0233542	0.19355	0.278647	-0.146841	0.278647	0.19355	-0.0617436	0.108452	0.19355	0.0233542	0.19355	-0.0617436	0.0233542	0.0233542	0.533941	0.108452	0.363745	0.108452	-0.0617436	0.0233542	0.0233542	0.0233542	0.108452	0.108452	0.533941	0.619039	0.108452	0.619039	0.278647	0.108452	0.19355	0.278647	0.0233542	-0.0617436	-0.0617436	0.0233542	-0.146841	0.108452	-0.0617436
EMR17002_20170824_S_01A	F	X	L	0.00460463	-0.0713191	-0.0207033	0.131144	0.358915	0.156452	0.308299	0.131144	0.00460463	0.257684	0.156452	0.384223	0.460147	0.207068	0.66261	0.358915	0.53607	0.409531	0.510763	0.358915	0.66261	0.586686	0.409531	0.358915	0.586686	0.333607	0.308299	0.282991	0.282991	-0.147243	-0.0460112	0.257684	0.131144	0.0552204	0.0805283	0.0299125	0.0552204	0.156452	-0.0713191	0.105836
EMR17002_20170824_S_05A	F	X	R	0.0372653	0.124781	-0.0940083	-0.181524	-0.0940083	-0.239868	-0.181524	-0.254454	-0.385727	-0.414899	-0.385727	-0.517001	-0.589931	-0.560759	-0.619102	-0.706618	-0.677446	-0.721204	-0.677446	-0.66286	-0.677446	-0.706618	-0.73579	-0.677446	-0.677446	-0.589931	-0.546173	-0.152352	0.533188	0.533188	0.518602	0.139367	0.358156	0.839493	1.29166	2.00637	2.66274	2.60439	2.47312	2.12306
EMR17002_20170824_S_07A	F	X	L	-0.114833	0.0305496	-0.114833	-0.0663722	-0.0663722	-0.211755	-0.114833	-0.0179113	-0.114833	-0.114833	-0.163294	0.0305496	-0.163294	-0.0663722	-0.0663722	-0.114833	0.0305496	0.175932	0.56362	-0.0179113	-0.211755	-0.211755	-0.163294	-0.211755	0.0305496	-0.0179113	-0.114833	-0.211755	-0.114833	-0.211755	-0.163294	-0.0663722	0.175932	0.660542	0.418237	0.660542	0.272854	0.224393	0.369776	-0.0663722
EMR17002_20170824_S_09A	F	X	L	0.414339	0.504721	0.396263	0.269728	0.287805	0.0708878	0.034735	-0.182182	-0.00141776	-0.182182	-0.218335	-0.29064	-0.254487	-0.308717	-0.362946	-0.344869	-0.344869	-0.362946	-0.344869	-0.344869	-0.146029	-0.272564	-0.218335	-0.127953	-0.236411	-0.344869	-0.471404	-0.507557	-0.453328	-0.417175	-0.507557	-0.525633	-0.489481	-0.525633	-0.54371	-0.489481	-0.525633	-0.453328	-0.399099	-0.489481
EMR17002_20170824_S_09B	F	X	R	-0.174451	-0.208837	-0.0712932	-0.174451	-0.243223	-0.34638	-0.174451	-0.105679	-0.105679	-0.174451	-0.243223	-0.277608	-0.105679	-0.105679	-0.311994	-0.174451	-0.243223	-0.277608	-0.243223	-0.208837	-0.311994	-0.243223	-0.277608	-0.243223	-0.105679	-0.0369074	-0.277608	-0.105679	-0.208837	-0.243223	-0.00252153	0.135022	-0.105679	-0.0369074	-0.00252153	-0.174451	-0.277608	-0.243223	-0.243223	-0.380766
EMR17002_20170824_S_11A	F	X	L	-0.105086	-0.213055	-0.105086	0.00288249	-0.159071	-0.159071	-0.159071	-0.159071	-0.26704	-0.159071	0.00288249	-0.0511019	-0.213055	-0.105086	-0.213055	-0.0511019	-0.105086	-0.159071	-0.213055	-0.159071	-0.105086	-0.105086	-0.159071	-0.105086	0.00288249	-0.213055	-0.26704	-0.26704	-0.213055	-0.26704	-0.213055	-0.105086	-0.159071	-0.105086	-0.105086	-0.0511019	0.00288249	0.00288249	-0.105086	-0.105086
EMR17002_20170824_S_11B	F		L	-0.0853883	-0.0197792	0.111439	0.111439	-0.0197792	-0.216606	-0.216606	0.177048	-0.0853883	-0.150997	-0.0197792	-0.0853883	0.111439	0.0458299	0.0458299	0.177048	-0.0197792	0.177048	-0.0853883	0.0458299	0.177048	0.0458299	0.111439	-0.0853883	-0.216606	-0.0197792	0.177048	0.111439	-0.0853883	0.177048	-0.0197792	0.0458299	-0.0853883	-0.0197792	-0.0197792	0.0458299	0.0458299	0.0458299	-0.0197792	0.111439
EMR17002_20170824_S_23A	F		L	-0.0254981	0.125945	0.0249828	0.226907	0.0754638	-0.12646	0.277387	0.125945	0.125945	-0.075979	0.277387	0.277387	0.0754638	-0.0254981	0.0249828	0.0754638	0.0249828	-0.0254981	0.0249828	-0.075979	0.0249828	-0.227422	-0.075979	-0.12646	-0.12646	0.125945	-0.075979	-0.227422	0.125945	-0.227422	-0.12646	0.125945	-0.0254981	0.0249828	0.176426	-0.0254981	0.176426	0.0249828	0.176426	0.0249828
EMR17002_20170824_S_23B	F	X	L	0.00550286	-0.137092	-0.101443	-0.101443	-0.17274	-0.101443	-0.0301458	0.00550286	0.0768002	0.183746	0.112449	0.504584	0.540233	0.504584	0.326341	0.468935	0.326341	0.61153	0.219395	0.290692	0.0768002	-0.17274	-0.137092	-0.208389	-0.137092	-0.208389	-0.208389	-0.279686	-0.244038	-0.279686	-0.208389	-0.208389	-0.244038	-0.208389	-0.208389	-0.17274	-0.208389	-0.137092	-0.244038	-0.244038
EMR17002_20170824_S_27A	F		R	-0.210454	-0.287815	-0.326495	-0.249134	-0.287815	-0.326495	-0.287815	-0.326495	-0.287815	-0.326495	-0.326495	-0.287815	-0.326495	-0.326495	-0.287815	-0.326495	-0.326495	-0.326495	-0.326495	-0.326495	-0.326495	-0.326495	-0.326495	-0.326495	-0.326495	-0.326495	-0.326495	-0.326495	-0.326495	-0.287815	-0.249134	-0.0557331	-0.133094	-0.133094	-0.210454	-0.0557331	-0.133094	-0.133094	-0.171774	-0.171774
EMR17002_20170824_S_31A	F	X	L	-0.0820895	-0.188008	-0.152702	-0.0820895	-0.117396	-0.188008	0.0238287	-0.293926	-0.223314	-0.0820895	0.0944409	0.235665	0.0238287	-0.117396	0.0238287	0.0238287	0.235665	0.200359	0.235665	-0.0467835	0.270971	0.200359	0.341583	0.306277	-0.0820895	-0.0820895	-0.188008	-0.0467835	-0.0467835	0.129747	-0.0114774	0.624032	0.55342	0.588726	0.306277	0.200359	0.0238287	-0.0467835	-0.188008	-0.0467835
EMR17003_20170612_S_05A	F		R	-0.173231	-0.173231	-0.0693033	-0.173231	-0.173231	-0.0693033	-0.173231	-0.173231	-0.0693033	-0.173231	-0.0693033	-0.0693033	-0.173231	-0.173231	-0.173231	-0.173231	-0.0693033	-0.173231	-0.173231	-0.173231	-0.173231	-0.173231	-0.173231	-0.0693033	-0.173231	-0.0693033	-0.173231	-0.173231	-0.0693033	-0.173231	-0.173231	-0.0693033	-0.173231	-0.173231	-0.173231	-0.173231	-0.173231	-0.173231	-0.173231	-0.173231
EMR17003_20170612_S_09A	F	X	L	-0.204538	0.0546172	0.0114246	-0.204538	-0.290924	-0.204538	-0.204538	-0.161346	-0.118153	-0.161346	-0.118153	-0.247731	-0.334116	-0.377309	-0.247731	-0.463694	-0.290924	-0.463694	-0.506887	-0.377309	-0.290924	-0.290924	-0.334116	-0.334116	-0.377309	-0.334116	-0.161346	-0.377309	-0.0749606	-0.161346	-0.161346	-0.247731	-0.334116	-0.290924	-0.420501	-0.334116	-0.377309	-0.0749606	0.313773	0.0546172
EMR17003_20170612_S_09B	F	X	R	-0.280775	-0.331262	-0.280775	-0.280775	-0.331262	-0.1798	-0.129312	-0.1798	-0.129312	-0.129312	-0.230287	-0.230287	-0.129312	-0.1798	-0.0283372	-0.230287	-0.230287	-0.280775	-0.280775	-0.331262	-0.331262	-0.381749	-0.381749	-0.381749	-0.381749	-0.432237	-0.331262	-0.381749	-0.432237	-0.432237	-0.432237	-0.381749	-0.381749	-0.381749	-0.381749	-0.331262	-0.432237	-0.331262	-0.381749	-0.280775
EMR17003_20170612_S_11A	F		L	0.267784	0.0871631	-0.0934579	0.207577	0.0871631	0.0269561	0.0871631	-0.153665	0.267784	0.0269561	-0.0332509	-0.0934579	-0.0332509	-0.0934579	-0.0332509	0.388198	-0.0934579	-0.213872	0.0269561	-0.0934579	-0.0332509	0.388198	-0.0332509	-0.0332509	-0.0332509	-0.0332509	-0.334286	-0.334286	-0.153665	-0.334286	-0.334286	-0.213872	-0.274079	-0.334286	-0.334286	-0.334286	-0.334286	-0.274079	-0.334286	-0.274079
EMR17003_20170612_S_13A	F	X	L	0.00152285	-0.204678	0.0702565	0.00152285	0.00152285	0.0702565	-0.135944	0.13899	-0.135944	-0.135944	-0.135944	0.0702565	0.0702565	-0.204678	-0.135944	0.00152285	-0.342145	0.00152285	-0.342145	-0.204678	-0.135944	0.13899	-0.0672108	-0.342145	0.0702565	-0.0672108	-0.135944	0.276457	0.345191	0.00152285	-0.204678	0.00152285	0.13899	0.0702565	0.345191	0.963794	0.688859	1.03253	0.688859	0.207724
EMR17003_20170612_S_17A	F	X	L	0.0617191	-0.193402	-0.0913538	0.112743	0.112743	0.163768	-0.0913538	0.112743	-0.142378	0.163768	0.163768	0.0617191	0.367865	0.316841	0.214792	0.265816	0.367865	0.367865	0.367865	0.878108	0.878108	0.367865	0.520938	0.622987	0.776059	0.878108	0.878108	0.674011	0.520938	0.316841	0.367865	0.0617191	0.163768	0.0106948	-0.142378	-0.244427	-0.346475	-0.193402	-0.193402	-0.448524
EMR17003_20170612_S_17B	F	X	L	0.621783	0.822925	0.621783	0.923496	0.320071	0.571498	0.621783	0.722354	0.420642	0.621783	0.621783	1.02407	0.672069	0.621783	0.621783	1.17492	1.42635	0.923496	0.923496	1.12464	0.873211	0.873211	0.923496	0.370356	0.169214	0.420642	0.118929	-0.0319273	-0.0319273	-0.283354	-0.0319273	-0.0822127	0.320071	0.118929	-0.0319273	-0.182784	-0.233069	-0.132498	-0.283354	-0.434211
EMR17003_20170612_S_17C	F	X	R	0.0164	0.132308	0.0743538	-0.0995075	-0.0995075	-0.157461	0.132308	-0.157461	0.0743538	0.190261	-0.0415537	-0.0415537	0.190261	0.248215	-0.0415537	0.0164	0.0164	0.0743538	-0.0995075	0.132308	-0.0995075	0.0743538	-0.0995075	-0.157461	0.132308	-0.0995075	-0.157461	-0.157461	-0.0995075	-0.157461	-0.215415	0.132308	0.0164	-0.0415537	-0.215415	-0.273369	-0.0995075	-0.0415537	-0.0995075	0.0743538
EMR17003_20170612_S_19A	F	X	L	-0.0630284	-0.140042	0.245024	0.0139848	0.090998	0.0139848	0.0139848	-0.0630284	-0.140042	-0.0630284	0.399051	-0.140042	0.322037	0.0139848	0.245024	0.399051	-0.0630284	0.322037	0.245024	0.399051	-0.140042	0.322037	0.476064	0.322037	0.399051	0.090998	0.168011	-0.140042	-0.0630284	0.168011	-0.140042	0.090998	0.245024	0.322037	-0.0630284	0.245024	-0.0630284	-0.0630284	0.090998	0.090998
EMR17003_20170612_S_21A	F	X	L	0.0374622	0.192227	-0.117303	-0.117303	-0.194685	-0.272068	0.0374622	-0.0399203	0.114845	0.346992	0.26961	-0.194685	-0.117303	0.192227	0.0374622	0.0374622	0.424375	0.0374622	0.57914	0.501757	0.346992	0.346992	-0.194685	0.424375	0.114845	0.0374622	-0.272068	-0.194685	-0.194685	-0.194685	-0.272068	-0.194685	-0.194685	-0.194685	0.114845	-0.272068	-0.117303	-0.272068	-0.194685	-0.117303
EMR17003_20170612_S_21B	F	X	L	-0.226615	-0.119163	-0.0117112	-0.226615	-0.0117112	-0.280341	-0.172889	-0.172889	-0.334067	-0.280341	-0.334067	-0.280341	-0.226615	-0.334067	-0.280341	-0.280341	0.0420147	0.0957406	-0.280341	-0.280341	-0.119163	-0.280341	-0.280341	-0.172889	-0.280341	-0.172889	-0.172889	-0.280341	-0.280341	-0.334067	-0.334067	-0.280341	-0.280341	-0.226615	-0.0654371	0.0957406	-0.172889	-0.280341	-0.334067	-0.172889
EMR17003_20170612_S_23A	F	X		-0.148924	-0.148924	-0.148924	0.0330857	-0.239929	0.215096	-0.148924	0.0330857	-0.0579193	-0.0579193	-0.148924	0.124091	-0.148924	-0.148924	-0.148924	-0.148924	-0.0579193	-0.239929	-0.0579193	-0.148924	-0.239929	-0.148924	-0.239929	-0.148924	-0.239929	-0.239929	-0.239929	-0.148924	-0.239929	-0.239929	-0.239929	-0.239929	-0.239929	-0.239929	-0.239929	-0.239929	-0.0579193	-0.148924	-0.0579193	0.124091
EMR17003_20170612_S_23B	F	X	L	-0.0978072	-0.260191	-0.0978072	-0.178999	-0.178999	-0.178999	-0.260191	-0.260191	-0.260191	-0.260191	-0.260191	-0.260191	-0.0978072	-0.260191	-0.260191	-0.260191	-0.260191	-0.260191	-0.260191	-0.178999	-0.260191	-0.178999	-0.260191	-0.260191	-0.0978072	-0.0166154	-0.178999	-0.178999	-0.178999	-0.260191	-0.178999	-0.260191	-0.178999	-0.260191	-0.260191	-0.260191	-0.260191	-0.260191	-0.178999	-0.260191
EMR17003_20170612_S_25A	F	X	L	-0.217331	-0.217331	-0.31095	-0.123711	-0.0769011	-0.31095	-0.217331	-0.170521	0.0167187	0.0167187	-0.0769011	0.110338	-0.0769011	-0.0769011	0.157148	-0.0769011	-0.0300912	-0.0300912	0.0167187	-0.31095	-0.264141	-0.40457	-0.40457	-0.264141	-0.264141	-0.40457	-0.31095	-0.40457	-0.35776	-0.35776	-0.45138	-0.45138	-0.35776	-0.45138	-0.45138	-0.35776	-0.45138	-0.40457	-0.40457	-0.40457
EMR17003_20170612_S_25B	F		L	-0.19885	-0.0978257	-0.19885	-0.19885	-0.19885	-0.19885	-0.0978257	-0.0978257	0.00319865	-0.0978257	0.00319865	-0.19885	-0.19885	-0.19885	-0.19885	-0.19885	0.205247	-0.19885	-0.0978257	0.00319865	0.205247	0.104223	-0.0978257	0.00319865	-0.19885	-0.19885	-0.19885	-0.19885	-0.19885	-0.19885	-0.19885	-0.0978257	-0.0978257	-0.19885	-0.19885	0.00319865	-0.19885	-0.0978257	-0.19885	-0.19885
EMR17003_20170612_S_27A	F		L	0.176647	0.0559398	-0.0647672	-0.0647672	0.0559398	-0.185474	-0.0647672	0.0559398	0.0559398	0.0559398	-0.0647672	0.0559398	-0.185474	0.0559398	0.0559398	0.0559398	-0.185474	-0.0647672	-0.0647672	0.0559398	0.0559398	0.0559398	-0.185474	-0.0647672	-0.0647672	0.0559398	-0.0647672	-0.0647672	-0.0647672	-0.185474	-0.0647672	-0.185474	-0.0647672	-0.185474	-0.0647672	-0.185474	-0.0647672	0.0559398	-0.185474	-0.185474
EMR17003_20170612_S_29A	F	X	L	-0.0991641	-0.0341204	-0.00159857	-0.0666422	0.0959669	0.161011	-0.0666422	0.226054	0.128489	-0.0666422	-0.00159857	-0.00159857	-0.0991641	-0.164208	0.0634451	-0.0991641	-0.0341204	0.193532	0.518751	0.356142	0.551273	0.68136	0.746404	1.16919	1.46188	1.52693	1.68954	1.72206	2.11232	1.72206	1.3318	1.16919	2.50258	2.60015	2.99041	3.5758	3.54328	3.8685	3.54328	2.76276
EMR17004_20170807_S_03A	F		L	-0.0761527	0.126028	-0.116589	-0.0357165	-0.0357165	-0.116589	-0.197461	-0.31877	-0.237897	-0.278333	-0.237897	-0.359206	-0.278333	-0.278333	-0.237897	-0.278333	-0.197461	-0.399642	-0.31877	-0.197461	-0.197461	-0.197461	-0.157025	0.0855919	0.0451558	0.126028	0.166464	0.2069	0.368645	0.00471963	0.247337	-0.116589	-0.116589	-0.116589	-0.0357165	0.368645	0.611262	0.166464	0.934751	0.570826
EMR17004_20170807_S_03B	F	X	L	0.171714	0.336514	0.171714	0.226647	-0.102952	0.226647	-0.102952	0.116781	0.171714	0.171714	0.226647	-0.0480191	0.00691411	0.116781	0.116781	0.28158	0.226647	0.00691411	-0.102952	-0.157886	0.28158	-0.0480191	0.226647	0.501313	0.44638	0.44638	0.44638	0.0618474	0.44638	0.501313	-0.0480191	-0.157886	0.0618474	0.116781	0.116781	0.116781	0.28158	0.0618474	0.336514	0.116781
EMR17004_20170807_S_07A	F	X	L	-0.158274	-0.158274	0.185126	0.185126	-0.158274	-0.0438071	0.0706594	0.0706594	0.0706594	0.0706594	-0.158274	-0.158274	-0.0438071	-0.158274	-0.158274	-0.158274	0.0706594	0.185126	-0.158274	-0.158274	0.0706594	-0.158274	0.299592	-0.0438071	0.0706594	0.0706594	0.528526	0.0706594	-0.158274	-0.0438071	-0.0438071	0.0706594	-0.0438071	-0.158274	0.0706594	0.185126	-0.158274	-0.0438071	0.0706594	-0.0438071
EMR17004_20170807_S_09A	F	X	R	-0.105103	-0.105103	-0.105103	-0.00575267	-0.154778	-0.154778	-0.0554277	-0.105103	-0.204453	-0.204453	-0.254128	-0.254128	-0.154778	-0.105103	-0.254128	-0.0554277	-0.204453	-0.154778	0.292298	-0.154778	-0.105103	-0.105103	-0.00575267	-0.105103	-0.154778	-0.0554277	0.143272	0.143272	-0.154778	-0.303803	-0.0554277	-0.254128	-0.204453	-0.105103	-0.105103	0.143272	-0.204453	-0.154778	-0.204453	-0.154778
EMR17004_20170807_S_11A	F	X	L	-0.0313447	-0.23215	-0.191989	0.0891387	-0.272312	-0.151828	-0.0313447	-0.0313447	-0.0715059	-0.151828	-0.0715059	-0.0715059	-0.0313447	0.1293	0.00881641	-0.111667	0.0891387	0.0489776	0.289944	0.0891387	-0.0313447	-0.111667	-0.0313447	-0.151828	-0.191989	-0.151828	-0.151828	-0.0313447	-0.151828	-0.312473	-0.191989	-0.352634	-0.272312	-0.23215	-0.23215	-0.23215	-0.272312	-0.392795	-0.392795	-0.191989
EMR17004_20170807_S_17A	F	X	L	-0.114473	-0.114473	0.118822	-0.114473	-0.21816	-0.0885515	0.0929	-0.0367082	-0.0626298	-0.0367082	0.24843	0.0410567	0.0151351	0.24843	0.196587	0.0151351	0.24843	-0.0107866	0.118822	-0.0626298	0.0410567	0.0151351	0.196587	0.0669783	0.429881	0.40396	0.40396	0.144743	-0.0626298	0.222508	-0.0626298	-0.0885515	-0.166316	-0.0367082	0.144743	0.0410567	-0.270003	-0.114473	-0.114473	-0.140395
EMR17006_20170615_S_01A	M	X	R	0.0725633	0.328503	0.840381	0.499129	0.0725633	0.499129	0.584442	0.499129	-0.183376	0.840381	0.328503	0.243189	0.328503	0.669755	0.328503	0.755068	0.243189	0.413816	0.243189	0.328503	0.157876	0.157876	-0.183376	0.328503	0.157876	-0.0127499	0.243189	-0.098063	0.413816	0.157876	0.157876	0.243189	0.328503	0.243189	0.584442	0.413816	0.328503	1.01101	0.243189	0.328503
EMR17006_20170615_S_03A	M			0.105577	-0.0304777	0.0375497	-0.0304777	-0.166532	-0.302587	0.0375497	-0.166532	-0.166532	-0.302587	-0.23456	0.105577	-0.098505	-0.098505	-0.23456	-0.098505	-0.166532	-0.23456	-0.166532	-0.23456	-0.098505	-0.23456	-0.23456	-0.0304777	-0.0304777	-0.23456	-0.302587	0.0375497	-0.098505	-0.0304777	-0.23456	-0.370615	-0.23456	-0.370615	-0.098505	-0.23456	-0.370615	-0.23456	-0.23456	-0.098505
EMR17006_20170615_S_05A	M	X	L	-0.343595	-0.38423	-0.38423	-0.465499	-0.465499	-0.506134	-0.465499	-0.465499	-0.506134	-0.506134	-0.506134	-0.546769	-0.546769	-0.546769	-0.546769	-0.546769	-0.506134	-0.546769	-0.546769	-0.546769	-0.546769	-0.546769	-0.506134	-0.546769	-0.546769	-0.546769	-0.506134	-0.506134	-0.546769	-0.546769	-0.506134	-0.465499	-0.546769	-0.546769	-0.506134	-0.546769	-0.546769	-0.465499	-0.506134	-0.546769
EMR17006_20170615_S_07A	M		L	-0.0791015	0.0534828	-0.211686	-0.0791015	-0.211686	-0.211686	-0.211686	-0.0791015	-0.0791015	0.0534828	-0.0791015	-0.211686	-0.211686	-0.0791015	-0.211686	-0.211686	-0.211686	-0.0791015	-0.0791015	-0.0791015	0.0534828	0.0534828	-0.211686	-0.211686	0.0534828	-0.0791015	-0.211686	0.186067	-0.211686	-0.211686	-0.211686	-0.0791015	-0.211686	-0.0791015	-0.211686	-0.211686	-0.0791015	0.0534828	-0.211686	-0.211686
EMR17006_20170615_S_09A	M	X	R	1.02471	1.34659	1.34659	0.960335	0.89596	1.15346	0.831584	0.509707	0.574083	0.767209	0.638458	0.89596	0.831584	0.252206	0.316581	0.316581	0.445332	0.252206	0.702833	0.123455	0.316581	0.252206	0.831584	0.252206	0.445332	0.831584	1.28221	1.66846	1.21784	1.79722	2.18347	1.73284	2.69847	2.31222	1.47534	1.99034	1.08909	1.21784	1.02471	1.02471
EMR17006_20170615_S_09B	M		R	0.0974892	0.0974892	0.173502	0.173502	0.173502	0.0214764	0.0974892	-0.130549	-0.0545365	0.0214764	0.249515	0.249515	-0.130549	-0.130549	-0.130549	-0.206562	-0.282575	-0.282575	-0.206562	-0.0545365	-0.206562	-0.206562	-0.282575	-0.206562	-0.206562	-0.206562	-0.206562	-0.282575	-0.358588	-0.130549	-0.0545365	0.249515	1.00964	0.401541	0.477553	0.781605	0.249515	0.93363	0.173502	0.401541
EMR17006_20170615_S_11A	M		L	0.036485	-0.0299241	-0.162742	0.102894	-0.162742	-0.0963333	-0.0963333	-0.162742	-0.162742	-0.0299241	-0.229152	-0.0299241	-0.162742	-0.162742	-0.0963333	-0.229152	-0.162742	-0.0299241	0.036485	0.102894	0.036485	-0.229152	-0.0299241	-0.229152	-0.162742	-0.229152	-0.162742	-0.229152	-0.229152	-0.295561	-0.0963333	-0.295561	-0.229152	-0.295561	-0.162742	-0.162742	0.169303	-0.229152	-0.229152	-0.229152
EMR17006_20170615_S_11B	M	X	R	0.0901538	-0.232934	-0.125238	-0.0175422	-0.286782	-0.0175422	0.0901538	0.0363058	0.0901538	0.251698	0.0901538	0.144002	0.0363058	0.46709	0.305546	0.305546	0.574786	0.46709	0.574786	0.359394	0.305546	0.359394	0.305546	0.0901538	-0.286782	-0.34063	-0.448326	-0.502174	-0.502174	-0.448326	-0.34063	-0.34063	-0.448326	-0.394478	-0.448326	-0.34063	-0.179086	-0.34063	-0.394478	-0.34063
EMR17006_20170615_S_11C	M		R	-0.11575	-0.202609	-0.0288905	-0.202609	-0.202609	-0.11575	-0.11575	-0.202609	-0.0288905	-0.202609	-0.202609	-0.202609	-0.11575	-0.202609	-0.11575	-0.0288905	-0.202609	-0.11575	-0.11575	-0.11575	-0.11575	-0.11575	-0.202609	-0.202609	-0.202609	-0.202609	-0.202609	-0.202609	-0.202609	-0.202609	-0.202609	-0.202609	-0.202609	-0.202609	-0.202609	-0.202609	-0.202609	-0.202609	-0.202609	-0.202609
EMR17006_20170615_S_11D	M			-0.111663	-0.111663	-0.111663	-0.111663	-0.111663	-0.111663	-0.111663	-0.111663	-0.111663	-0.111663	-0.111663	-0.111663	-0.111663	-0.111663	-0.111663	-0.111663	-0.111663	-0.111663	-0.111663	-0.111663	-0.111663	-0.111663	-0.111663	-0.111663	-0.111663	-0.111663	-0.111663	-0.111663	-0.111663	-0.111663	-0.111663	-0.111663	-0.111663	-0.111663	-0.111663	-0.111663	-0.111663	-0.111663	-0.111663	-0.111663
EMR17006_20170615_S_13A	M	X	L	0.136642	0.390642	0.559976	0.178975	0.178975	0.136642	0.136642	0.72931	0.348309	0.856311	0.0519746	0.390642	0.432976	0.305976	0.475309	0.348309	0.263642	-0.0326923	-0.0326923	0.221309	0.136642	0.263642	0.390642	0.898644	0.686977	0.898644	0.60231	0.940978	0.305976	0.0943081	0.475309	-0.0750258	0.475309	0.348309	0.60231	0.60231	0.72931	0.348309	0.475309	0.432976
EMR17006_20170615_S_15A	M	X	L	-0.0167364	0.00674592	0.124157	0.100675	0.0537105	-0.0167364	-0.0402187	-0.134148	0.14764	-0.0402187	0.00674592	-0.063701	-0.0167364	-0.345489	-0.0871833	-0.181113	0.171122	-0.181113	-0.0167364	0.218087	-0.0167364	0.100675	0.335498	0.218087	0.14764	0.711215	1.06345	0.75818	0.382463	-0.134148	-0.345489	-0.0402187	0.0537105	0.405945	0.382463	0.358981	0.171122	0.0302282	0.265051	0.0302282
EMR17006_20170615_S_15B	M	X	R	0.0335661	0.442247	0.367941	0.590858	0.553705	0.628011	0.553705	0.88808	0.405094	1.111	0.4794	0.442247	0.516552	0.702316	0.962386	0.590858	0.813775	0.739469	0.4794	0.442247	0.442247	0.182177	0.0707189	-0.226503	-0.263656	-0.0778922	-0.263656	-0.115045	-0.0407394	0.0707189	0.962386	0.293636	-0.152198	-0.189351	0.21933	0.813775	0.702316	0.962386	0.590858	0.590858
EMR17006_20170615_S_17A	M	X	R	0.0774949	0.450418	0.525003	0.450418	0.506357	0.114787	0.63688	0.506357	0.301249	0.338541	0.226664	-0.108967	0.674173	0.226664	0.0774949	0.357188	0.189372	0.00291015	-0.220844	-0.0903207	-0.220844	-0.0343822	0.0215563	0.096141	0.226664	-0.0716746	0.096141	1.14033	0.096141	0.114787	-0.258136	-0.351367	-0.258136	-0.425952	-0.332721	-0.295429	-0.332721	0.0402025	0.282603	0.338541
EMR17006_20170615_S_17B	M	X	L	0.478629	0.273472	0.119604	-0.0855529	-0.0342636	0.0170256	0.478629	-0.0342636	0.170894	0.0170256	-0.0855529	0.119604	-0.188132	-0.341999	-0.239421	-0.341999	0.119604	-0.0342636	0.0170256	0.529919	0.42734	0.529919	1.35055	1.45313	0.837654	0.376051	0.222183	-0.188132	-0.444578	-0.393289	-0.393289	-0.444578	-0.444578	-0.495867	-0.393289	-0.239421	-0.136842	-0.239421	-0.393289	-0.239421
EMR17006_20170615_S_23A	M	X	R	0.237196	0.207013	0.237196	0.780491	0.659759	0.357928	0.629576	0.116463	0.267379	0.418294	0.357928	0.418294	0.267379	0.116463	0.569209	0.448477	0.357928	0.17683	0.146647	0.448477	0.689942	0.357928	0.0259143	-0.0646349	-0.336282	-0.366466	-0.426832	-0.396649	-0.185367	-0.155184	-0.275916	-0.125001	-0.185367	0.0560974	-0.0646349	0.116463	-0.00426877	-0.21555	-0.0344518	-0.21555
EMR17006_20170615_S_25A	M	X	R	0.231563	0.298387	0.699327	1.16709	0.632503	0.632503	0.632503	0.498857	1.03344	1.10027	1.36756	0.76615	1.36756	1.23391	1.16709	0.899797	0.899797	1.23391	0.76615	1.03344	0.36521	0.699327	0.498857	0.298387	0.0979167	-0.03573	-0.369847	-0.369847	-0.369847	-0.369847	-0.369847	-0.2362	-0.303023	-0.2362	-0.2362	-0.369847	-0.169377	-0.03573	-0.369847	-0.169377
EMR17006_20170615_S_27A	M	X	R	0.147199	0.00657059	-0.134058	-0.204372	0.0768849	-0.0285866	-0.239529	-0.309844	0.00657059	0.217514	-0.134058	-0.204372	-0.169215	-0.274687	-0.0285866	-0.309844	0.112042	-0.239529	-0.309844	-0.415315	0.182356	-0.274687	-0.0637437	-0.169215	-0.169215	-0.274687	-0.274687	-0.274687	-0.0989009	-0.274687	-0.380158	-0.309844	-0.450472	-0.169215	-0.274687	-0.345001	0.0417277	-0.0285866	-0.204372	-0.380158
EMR17006_20170615_S_27B	M	X	R	-0.0342506	-0.285788	-0.321722	-0.0701846	-0.285788	-0.321722	-0.537326	-0.321722	-0.537326	-0.142053	-0.39359	-0.501392	-0.465458	-0.501392	-0.429524	-0.357656	-0.501392	-0.39359	-0.39359	-0.106119	-0.321722	-0.177987	-0.321722	-0.465458	-0.357656	-0.537326	-0.609194	-0.501392	-0.57326	-0.645128	-0.57326	-0.645128	-0.609194	-0.609194	-0.645128	-0.645128	-0.609194	-0.609194	-0.645128	-0.645128
EMR17006_20170615_S_31A	M	X	L	0.123268	0.0635257	0.123268	0.00378366	0.123268	0.242752	-0.0559583	0.242752	0.541462	0.302494	0.0635257	0.0635257	0.421978	0.00378366	0.421978	0.302494	-0.0559583	0.18301	-0.175442	0.00378366	0.123268	0.660946	-0.0559583	0.123268	0.362236	0.362236	0.78043	0.18301	0.362236	0.123268	-0.175442	0.00378366	0.00378366	-0.175442	0.18301	-0.175442	0.00378366	0.18301	-0.1157	0.0635257
EMR17007_20170614_S_01A	M		R	-0.00589184	-0.0606197	0.0305934	-0.0241345	0.0305934	0.176534	0.140049	0.140049	0.176534	0.0670786	0.28599	0.048836	0.048836	0.0305934	-0.0606197	-0.261288	-0.0423771	0.0123508	-0.0971049	-0.115348	-0.0971049	-0.115348	-0.13359	-0.206561	-0.334259	-0.115348	-0.206561	-0.0971049	0.048836	0.28599	0.121806	-0.115348	-0.0788623	-0.0606197	0.0853212	-0.00589184	-0.188318	-0.115348	0.0123508	0.121806
EMR17007_20170614_S_01B	M		L	0.10413	0.255761	-0.0475015	0.0283141	0.255761	-0.0475015	-0.0475015	-0.123317	-0.0475015	0.10413	-0.0475015	0.10413	-0.123317	-0.123317	-0.0475015	0.10413	0.0283141	-0.0475015	-0.0475015	0.0283141	0.179945	0.0283141	-0.123317	-0.123317	-0.123317	-0.123317	-0.0475015	-0.123317	0.10413	0.559023	0.10413	0.179945	-0.0475015	-0.0475015	-0.0475015	-0.123317	-0.123317	-0.123317	0.179945	-0.0475015
EMR17007_20170614_S_03A	M	X	L	0.427283	0.131113	0.33473	0.00153924	0.112603	0.168135	0.149624	0.260688	0.0385604	0.186645	0.00153924	0.131113	-0.109524	0.00153924	-0.0910138	-0.0539926	-0.146546	-0.035482	-0.128035	-0.109524	-0.109524	-0.29463	-0.202077	-0.202077	-0.0169714	-0.183567	0.00153924	0.223666	0.408772	0.260688	0.057071	0.149624	-0.035482	-0.109524	-0.109524	-0.035482	-0.146546	-0.220588	-0.313141	-0.202077
EMR17007_20170614_S_03B	M	X	L	0.0310633	-0.213724	0.00658456	0.055542	0.104499	-0.0668516	0.055542	-0.0178941	0.202414	-0.0423729	0.0310633	0.0800207	0.104499	0.47168	-0.0668516	0.202414	0.0800207	0.422723	0.104499	0.104499	-0.0178941	-0.0668516	-0.0423729	-0.189245	-0.262681	-0.213724	-0.189245	-0.262681	0.00658456	-0.0668516	-0.28716	-0.115809	-0.238203	-0.28716	-0.213724	-0.189245	0.0310633	-0.0178941	0.104499	0.104499
EMR17007_20170614_S_05A	M		R	0.193741	-0.143224	-0.210617	-0.00843783	-0.00843783	0.126348	-0.00843783	0.0589552	-0.0758309	0.193741	-0.143224	-0.00843783	-0.143224	-0.00843783	-0.0758309	0.0589552	-0.00843783	-0.143224	0.193741	-0.00843783	-0.143224	-0.00843783	0.0589552	-0.143224	-0.0758309	0.0589552	0.193741	-0.210617	-0.143224	-0.00843783	-0.210617	-0.00843783	-0.210617	-0.0758309	-0.210617	-0.0758309	-0.143224	-0.143224	-0.00843783	0.261134
EMR17007_20170614_S_07A	M	X	R	0.079093	0.19459	-0.00752995	-0.00752995	0.079093	0.151279	0.411148	0.815388	0.902011	1.21963	1.42175	1.01751	0.916448	1.2485	0.685454	0.887574	0.699891	0.29565	0.165716	-0.00752995	-0.224087	-0.252962	-0.20965	-0.281836	-0.397333	-0.354022	-0.123027	0.19459	0.180153	-0.10859	-0.281836	0.0069072	0.454459	0.627705	0.844262	1.19075	1.03195	1.26294	1.00307	1.07526
EMR17007_20170614_S_09A	M	X	R	0.00365157	0.132359	0.0358284	-0.189409	0.228889	-0.0928788	-0.0928788	0.0680051	-0.0928788	-0.189409	-0.318116	-0.125056	-0.125056	-0.0285252	-0.0928788	-0.0928788	-0.189409	-0.0928788	-0.060702	0.0358284	-0.157232	-0.0928788	-0.0928788	-0.157232	-0.125056	-0.125056	0.0680051	-0.0928788	-0.221586	-0.189409	-0.253763	0.0358284	-0.221586	-0.253763	-0.060702	-0.189409	-0.189409	-0.125056	0.0680051	0.132359
EMR17007_20170614_S_09B	M		R	0.0481352	-0.157763	0.0481352	0.0481352	0.133926	0.0138188	-0.0891305	-0.0891305	-0.0204976	0.0824516	-0.0891305	-0.0719723	-0.209238	-0.19208	-0.0891305	-0.0891305	-0.260713	-0.209238	-0.19208	-0.0548141	-0.140605	-0.243554	-0.260713	-0.19208	-0.226396	-0.260713	-0.19208	-0.260713	-0.209238	-0.106289	0.305508	0.151084	0.0652934	0.254034	0.168243	0.202559	0.0824516	0.442774	-0.0891305	-0.0719723
EMR17007_20170614_S_11A	M	X	R	0.0246256	0.234341	0.0246256	0.114504	0.0246256	-0.00533382	-0.21505	0.054585	-0.125171	0.174423	-0.125171	-0.21505	0.144463	0.114504	0.114504	0.264301	0.0246256	0.144463	0.0246256	-0.0352932	-0.364847	-0.304928	-0.274969	-0.304928	-0.21505	0.0246256	0.0845444	0.054585	0.144463	-0.00533382	0.144463	-0.0652526	-0.18509	-0.125171	-0.125171	-0.0952121	0.174423	0.144463	0.533936	0.923408
EMR17007_20170614_S_11B	M		L	0.148823	0.00143492	0.148823	0.00143492	0.00143492	-0.072259	-0.145953	-0.072259	-0.145953	-0.072259	-0.072259	-0.145953	-0.072259	-0.072259	-0.072259	-0.145953	0.00143492	-0.072259	-0.072259	-0.145953	-0.145953	-0.145953	-0.072259	0.148823	-0.145953	0.148823	0.00143492	-0.145953	-0.072259	0.00143492	-0.145953	-0.145953	-0.072259	-0.145953	-0.145953	-0.145953	0.00143492	0.0751288	0.0751288	0.29621
EMR17007_20170614_S_17A	M	X	L	0.219872	-0.130763	0.141953	0.219872	0.258832	0.180913	0.219872	0.102994	0.141953	0.219872	0.219872	0.219872	0.102994	0.336751	0.0640342	-0.0918039	0.219872	-0.0918039	-0.0528444	-0.0918039	-0.0528444	0.0250747	-0.0528444	-0.130763	0.180913	0.141953	-0.0528444	0.219872	0.219872	-0.0138848	-0.130763	-0.208682	-0.0528444	-0.208682	-0.0918039	0.219872	-0.0138848	-0.0138848	-0.169723	0.0250747
EMR17007_20170614_S_17B	M		L	0.184042	-0.00885122	0.119744	0.0554464	-0.041	0.248339	-0.0731488	0.184042	0.119744	0.409083	0.151893	-0.00885122	0.119744	0.119744	-0.041	-0.00885122	-0.201744	-0.169595	-0.105298	-0.169595	-0.233893	-0.169595	-0.233893	-0.201744	0.248339	-0.169595	-0.105298	0.151893	0.119744	-0.105298	-0.298191	-0.233893	-0.201744	-0.201744	-0.169595	-0.00885122	-0.041	-0.105298	-0.137446	0.184042
EMR17007_20170614_S_23A	M	X	R	0.340887	0.257156	0.257156	0.0687622	0.288556	0.0792286	0.236224	0.162959	0.0164305	0.0268968	0.225757	0.267623	0.403685	0.267623	0.393219	0.236224	0.351354	0.351354	0.330421	0.288556	0.309488	0.508349	0.738609	0.518815	0.382753	0.299022	0.529282	1.03167	1.06307	1.28286	0.749075	0.372286	0.299022	-0.171964	-0.29756	-0.245228	-0.203363	-0.00450223	-0.056834	0.194358
EMR17007_20170614_S_23B	M	X	R	0.233874	0.233874	0.4568	0.260101	0.312554	0.312554	-0.0283911	-0.0415043	0.0502885	0.0634018	-0.00216453	-0.0677308	-0.107071	-0.22509	-0.0808441	0.0109487	-0.0152778	-0.238203	-0.120184	-0.0152778	-0.0546176	-0.0283911	0.115855	0.194534	-0.0808441	-0.00216453	0.0765151	0.155195	0.496139	0.351894	-0.0152778	-0.0283911	-0.0283911	0.0109487	-0.00216453	-0.0415043	-0.107071	0.0502885	-0.133297	-0.277543
EMR17007_20170614_S_27A	M	X	R	0.279933	0.363792	0.21005	-0.0834573	-0.0135745	-0.0555042	-0.0415276	0.140168	0.0563082	0.140168	0.601394	0.545488	0.713206	0.69923	1.11853	0.894901	1.04864	0.866948	0.349816	0.0423317	-0.237199	-0.0834573	-0.125387	0.0143786	0.0982379	-0.0974338	0.0143786	0.238003	0.671277	0.29391	0.349816	-0.0415276	-0.19527	-0.0275511	0.335839	0.797066	1.11853	1.52385	1.76145	2.05496
EMR17007_20170614_S_27B	M		R	-0.0665328	-0.0665328	-0.115402	-0.0176639	0.324419	-0.0665328	-0.115402	-0.164271	-0.0176639	-0.164271	-0.115402	-0.0665328	-0.164271	-0.21314	-0.0176639	-0.0176639	-0.164271	-0.164271	-0.164271	-0.115402	-0.21314	-0.21314	-0.21314	-0.21314	-0.115402	-0.0665328	0.128943	0.0312051	-0.164271	-0.115402	-0.0176639	-0.21314	-0.164271	-0.164271	-0.21314	-0.115402	0.0312051	-0.21314	0.128943	0.0800741
EMR17008_20170629_S_01A	M	X	R	-0.315763	-0.215149	-0.174903	-0.114535	0.207432	0.0263256	-0.0742888	0.40866	0.227554	0.368415	0.00620271	0.0263256	0.0665714	-0.034043	-0.29564	-0.174903	-0.0944117	-0.255395	-0.134657	-0.15478	-0.134657	0.00620271	-0.134657	-0.114535	0.0866942	0.187309	0.247677	0.12694	0.469029	0.187309	0.428783	0.448906	0.790995	0.931855	0.650135	0.529398	0.247677	0.106817	0.00620271	0.167186
EMR17008_20170629_S_01B	M	X	L	-0.164581	-0.102715	-0.133648	-0.195515	-0.102715	-0.133648	0.082886	0.082886	-0.102715	0.268487	0.29942	0.732488	0.670621	0.887155	0.701555	1.07276	1.44396	1.93889	1.81516	1.07276	0.918089	0.670621	0.423154	0.144753	-0.0717811	-0.319249	-0.195515	-0.133648	-0.195515	-0.226448	-0.288315	-0.164581	-0.226448	-0.288315	-0.412049	-0.288315	-0.257382	-0.195515	-0.00991428	0.082886
EMR17008_20170629_S_01C	M	X	L	0.304084	0.41232	0.331143	0.466438	0.547615	0.628793	0.439379	0.114671	0.195848	0.249966	0.14173	0.195848	0.249966	0.00643452	0.114671	-0.128861	-0.0747426	-0.0476836	0.14173	0.0334936	0.222907	0.249966	0.466438	0.953501	1.03468	1.5488	1.62998	1.44056	1.19703	0.764088	0.601734	0.249966	0.358202	-0.0747426	0.0876117	-0.101802	-0.345333	-0.291215	-0.345333	-0.345333
EMR17008_20170629_S_01D	M	X	L	0.0107661	-0.0472093	-0.105185	0.155705	-0.0472093	-0.134172	0.0107661	-0.134172	0.329631	-0.105185	-0.16316	-0.279111	-0.076197	-0.134172	-0.279111	0.0397538	0.155705	0.0107661	-0.105185	0.0977292	0.0687415	-0.16316	-0.16316	0.0687415	0.387606	0.271655	0.300643	0.0107661	0.416594	-0.076197	-0.279111	-0.076197	-0.221136	-0.250123	-0.337086	-0.366074	-0.366074	-0.16316	-0.134172	-0.192148
EMR17008_20170629_S_03A	M		L	0.0509023	0.248487	0.0509023	0.163808	0.30494	0.192034	0.149695	0.192034	0.177921	0.0509023	0.206148	0.0367891	0.220261	0.361393	0.163808	0.177921	0.0932419	0.276714	0.0932419	0.121468	0.0932419	-0.0478901	-0.132569	-0.287814	-0.44306	-0.217248	-0.146682	-0.0196637	0.121468	0.248487	-0.00555046	-0.0337769	-0.00555046	-0.344267	-0.44306	-0.316041	0.206148	0.0509023	0.389619	0.431959
EMR17008_20170629_S_05A	M	X	L	-0.291371	-0.34395	-0.37024	-0.186211	-0.265081	-0.238791	-0.212501	-0.37024	-0.42282	-0.291371	-0.186211	-0.186211	-0.238791	-0.265081	-0.0284726	-0.186211	0.024107	0.208136	0.681352	0.576193	0.523613	0.94425	0.392164	0.471034	0.549903	0.234425	0.0503968	-0.34395	-0.34395	-0.554269	-0.238791	-0.449109	-0.212501	-0.501689	-0.37024	-0.475399	-0.527979	-0.501689	-0.212501	-0.37024
EMR17008_20170629_S_09A	M	X	L	-0.0704933	-0.0411017	0.223423	0.546731	0.546731	0.16464	0.693689	0.370381	0.194031	0.252815	0.0470732	0.0764648	0.0470732	0.105856	-0.0411017	0.0470732	0.0176815	-0.0704933	0.0176815	0.0470732	0.0470732	0.252815	0.223423	0.252815	0.252815	0.340989	0.105856	0.399773	0.135248	0.429164	0.0764648	0.0764648	0.16464	0.487948	0.105856	0.370381	0.576122	0.370381	0.0470732	0.135248
EMR17008_20170629_S_11A	M	X	L	0.104436	0.127448	-0.0106256	0.127448	0.173473	0.0584113	0.15046	-0.0106256	-0.0106256	0.196485	0.15046	0.104436	0.104436	0.196485	0.0814235	0.15046	0.357571	0.587694	0.863841	1.57722	2.26759	3.16507	4.26966	5.51232	5.53533	5.51232	3.92447	1.80734	0.817816	0.380583	0.0814235	-0.0796624	-0.194724	-0.240748	-0.240748	-0.217736	-0.240748	-0.217736	-0.240748	-0.240748
EMR17008_20170629_S_11B	M	X	R	0.308073	0.0904624	0.308073	0.308073	0.133984	0.264551	0.482161	0.699771	0.264551	0.0469403	-0.0836258	-0.17067	-0.0401037	-0.0836258	0.177506	0.308073	0.133984	0.0469403	-0.214192	-0.0836258	-0.0836258	-0.0401037	0.0034183	0.0034183	-0.0836258	0.221029	0.0034183	0.264551	0.525683	0.612727	0.699771	0.308073	0.133984	-0.127148	-0.0401037	0.177506	-0.0836258	-0.17067	-0.257714	-0.0836258
EMR17008_20170629_S_11C	M	X	R	0.176035	0.398673	0.250247	0.101822	0.138928	0.250247	0.250247	-0.00949709	0.101822	0.213141	0.101822	0.0276093	-0.157923	-0.0466035	-0.232135	-0.120816	-0.0837098	-0.0837098	-0.195029	-0.00949709	0.0647156	-0.0466035	-0.120816	-0.157923	-0.195029	-0.0466035	-0.0466035	-0.00949709	-0.232135	-0.157923	0.138928	0.435779	0.73263	0.658417	0.806843	0.176035	0.0276093	-0.00949709	-0.0837098	-0.195029
EMR17008_20170629_S_17A	M	X	L	0.225472	-0.0490176	-0.00326935	0.0653531	0.0653531	0.0653531	0.133975	0.0196048	0.111101	0.0196048	0.0424789	0.179724	0.225472	-0.0490176	-0.0261435	-0.209137	-0.415004	-0.415004	-0.575123	-0.689493	-0.597997	-0.735242	-0.643745	-0.415004	-0.163388	0.0424789	0.362717	0.705829	1.11756	0.980319	0.614332	0.202598	-0.323507	-0.232011	-0.277759	-0.5065	-0.346381	-0.415004	-0.415004	-0.254885
EMR17008_20170629_S_17B	M		L	-0.0418529	0.0938906	-0.0961502	-0.0690015	0.0667419	0.0395932	0.392526	0.175337	-0.0961502	0.202485	-0.0690015	0.0124445	0.0124445	0.0667419	-0.0961502	-0.204745	0.0395932	-0.259042	-0.231894	-0.259042	-0.0147042	-0.204745	-0.150448	-0.0961502	0.0395932	-0.0418529	0.0395932	0.121039	0.256783	-0.0690015	0.202485	0.256783	0.256783	0.175337	0.338229	0.446823	0.0938906	-0.204745	-0.0690015	-0.123299
EMR17008_20170629_S_17C	M	X	L	-0.316703	-0.223957	-0.168309	-0.0941119	-0.13121	-0.0199148	-0.13121	-0.186858	0.0171837	0.035733	-0.242506	0.184127	-0.0755627	-0.0199148	0.147029	-0.0570134	0.0542823	-0.0570134	-0.0384641	-0.335253	-0.223957	-0.279605	-0.335253	-0.594942	-0.706238	-0.557844	-0.186858	-0.00136557	-0.0384641	0.165578	0.0728315	0.165578	-0.3909	-0.335253	-0.687689	-0.706238	-0.743337	-0.520745	-0.465097	-0.205408
EMR17008_20170629_S_19A	M	X	R	-0.0603772	-0.183419	0.0380565	-0.0357688	-0.232636	-0.109594	0.062665	0.0134481	0.13649	0.0872734	-0.134203	-0.0603772	-0.0849856	-0.0849856	0.062665	-0.158811	-0.0849856	0.185707	0.308749	0.259532	0.382575	0.407183	0.185707	0.161099	-0.0111603	-0.33107	-0.380287	-0.33107	-0.257245	-0.183419	-0.33107	-0.109594	0.333358	0.308749	0.161099	0.111882	0.062665	0.062665	0.308749	0.161099
EMR17008_20170629_S_19B	M	X	L	0.430651	0.468224	0.355504	0.299143	0.449438	0.449438	0.524585	0.26157	0.712452	0.505798	0.242783	0.355504	-0.208099	-0.189312	-0.226886	-0.414754	-0.43354	-0.283246	-0.358393	-0.264459	-0.339606	0.186423	0.355504	0.750026	0.543371	0.637305	0.242783	0.186423	-0.00144473	-0.32082	-0.452327	-0.189312	0.167636	0.130063	0.148849	0.0549156	-0.170526	-0.339606	-0.602621	-0.583834
EMR17008_20170629_S_19C	M		L	-0.092015	-0.110343	-0.183655	-0.146999	-0.0553589	0.0546097	-0.073687	0.109594	0.109594	-0.0187027	0.14625	0.182906	-0.256968	-0.146999	-0.0553589	-0.256968	-0.092015	-0.092015	0.182906	0.366187	-0.0187027	0.0546097	-0.23864	0.0912658	0.0729378	0.0362816	-0.146999	-0.0187027	-0.183655	-0.256968	-0.0370308	0.0179535	0.201234	-0.073687	-0.0370308	-0.275296	-0.33028	-0.256968	-0.440249	-0.256968
EMR17008_20170629_S_21A	M	X	L	-0.228058	-0.126687	-0.101345	-0.164702	-0.253401	-0.253401	-0.0760019	-0.202716	-0.304087	-0.24073	-0.418129	-0.304087	-0.164702	-0.367444	-0.380115	-0.532172	-0.532172	-0.582857	-0.836285	-0.874299	-0.722242	-0.798271	-0.810942	-0.658885	-0.5195	-0.0886732	-0.0886732	0.367497	0.49421	0.430853	0.050712	-0.139359	-0.633543	-0.671557	-0.671557	-0.734914	-0.595529	-0.405458	-0.228058	0.12674
EMR17008_20170629_S_21B	M	X	L	-0.0344423	-0.305479	-0.20692	-0.108361	-0.23156	0.0394769	-0.157641	0.138036	-0.0344423	-0.059082	0.138036	0.113396	-0.059082	0.0394769	-0.108361	-0.157641	0.0148372	0.335154	0.310514	0.754029	1.00043	0.778668	1.12362	0.581551	0.0887563	-0.305479	-0.404038	-0.527237	-0.428678	-0.354759	-0.00980256	1.32074	2.38025	2.89768	2.72521	2.23241	1.73962	1.24682	1.09898	0.729389
EMR17008_20170629_S_21C	M	X	R	0.244304	0.310824	0.155611	0.199957	-0.0882967	0.310824	0.443865	0.554732	0.510385	0.177784	0.687772	0.887333	0.510385	0.754292	0.798639	1.17559	1.28645	1.15341	1.19776	0.820812	0.754292	0.621252	0.621252	0.310824	0.776466	0.310824	0.177784	0.443865	0.332998	0.310824	0.909506	0.909506	1.70775	1.55253	2.28426	1.88514	1.3308	0.687772	0.355171	0.199957
EMR17008_20170629_S_21D	M	X	R	0.0440941	-0.164145	-0.0600255	0.252333	0.252333	-0.129439	0.00938754	-0.198852	-0.233558	-0.441797	-0.372384	-0.407091	-0.476504	-0.511211	-0.476504	-0.268265	-0.302971	-0.441797	-0.337678	-0.198852	-0.0600255	-0.0947321	-0.025319	0.356453	0.113507	-0.0600255	0.356453	0.148214	0.529986	0.252333	0.252333	-0.0947321	-0.233558	-0.337678	-0.372384	-0.476504	-0.476504	-0.545917	-0.511211	-0.511211
EMR17008_20170629_S_23A	M	X	L	-0.151704	-0.193267	-0.214049	-0.151704	0.0353297	-0.0685779	0.118456	-0.151704	-0.276393	-0.338738	-0.130923	-0.151704	-0.151704	-0.0893595	-0.214049	-0.297175	-0.0893595	-0.23483	-0.463427	-0.359519	-0.317956	-0.380301	-0.338738	-0.484209	-0.193267	-0.130923	-0.380301	-0.110141	-0.0685779	-0.151704	-0.00623336	-0.0477964	-0.421864	-0.276393	-0.380301	-0.463427	-0.546553	-0.317956	-0.567335	-0.297175
EMR17008_20170629_S_23B	M	X	L	0.00630568	-0.188995	-0.105295	-0.258745	-0.230845	-0.0634445	-0.161095	-0.216895	-0.188995	-0.244795	-0.0634445	0.0900059	-0.147145	-0.0215944	-0.0773945	-0.00764435	0.424807	0.745657	0.745657	0.843307	1.34551	1.45711	1.41526	1.65241	1.44316	0.829357	1.27576	1.08046	0.801457	0.341106	0.494557	0.466657	0.885158	1.10836	0.452707	0.466657	0.145806	-0.230845	-0.300595	-0.300595
EMR17008_20170629_S_23C	M	X	L	0.200926	0.269043	0.023821	0.432524	0.432524	0.323536	0.255419	0.37803	0.487018	0.773109	0.745863	0.568758	0.745863	0.568758	0.228172	-0.071543	-0.248648	-0.344012	-0.534739	-0.398505	-0.493869	-0.412129	-0.0170493	0.0374444	0.241796	0.323536	0.350783	0.228172	0.023821	-0.248648	-0.412129	-0.289518	-0.235024	-0.153284	0.023821	0.37803	0.391654	0.555135	0.364407	0.432524
EMR17008_20170629_S_23D	M	X	L	-0.203467	-0.314595	-0.129383	-0.129383	-0.0552982	-0.314595	-0.277552	-0.314595	-0.203467	-0.388679	-0.388679	-0.351637	-0.166425	-0.277552	-0.277552	-0.314595	-0.24051	-0.129383	0.0187865	0.166956	0.166956	0.0928712	0.0928712	1.09301	0.833718	0.981887	0.241041	0.0558288	-0.0923405	-0.314595	-0.388679	-0.277552	-0.425722	-0.388679	-0.351637	-0.425722	-0.388679	-0.425722	-0.425722	-0.462764
EMR17008_20170629_S_23E	M	X	L	0.247967	0.58357	0.891206	0.695438	0.695438	0.86324	1.08697	1.25478	1.11494	1.28274	1.42258	1.64631	1.31071	1.33868	1.17088	0.891206	0.247967	0.192033	-0.087636	-0.115603	-0.0317021	0.0801656	0.247967	0.164066	0.695438	0.975107	1.05901	1.22681	1.08697	0.919173	0.639504	0.499669	0.471703	0.359835	0.723405	0.891206	1.03104	1.22681	1.28274	1.00307
EMR17008_20170629_S_25A	M	X	R	-0.0645449	-0.0124823	0.143705	-0.142639	0.0916428	0.0656115	0.0395802	0.0395802	-0.0124823	-0.0124823	-0.0645449	0.273862	0.0656115	0.013549	0.117674	0.221799	0.247831	0.612269	0.377987	0.404018	0.508143	0.143705	-0.220733	-0.142639	-0.194701	-0.220733	-0.194701	-0.220733	-0.220733	-0.194701	0.0916428	0.169737	0.0916428	-0.142639	-0.194701	-0.220733	-0.116607	0.013549	0.0656115	0.221799
EMR17008_20170629_S_25B	M		R	0.148727	0.236749	0.148727	0.236749	0.412793	0.119386	0.207408	0.178068	0.559496	0.471474	0.383452	0.706199	0.999606	0.354111	0.530155	0.354111	0.0607049	-0.17402	-0.203361	-0.291383	-0.115339	-0.0566577	-0.262042	-0.14468	-0.115339	-0.14468	-0.17402	-0.232702	-0.320724	-0.320724	-0.350064	-0.262042	-0.291383	-0.0859984	0.178068	0.324771	0.706199	0.852903	0.852903	0.530155
EMR17008_20170629_S_27A	M		L	-0.208392	-0.0659644	-0.00899349	0.21889	0.0194919	0.0194919	0.21889	0.161919	0.190405	0.0194919	0.133434	0.0194919	-0.265362	-0.0944498	-0.0944498	0.0479774	-0.0944498	-0.0374789	-0.0374789	0.133434	-0.0944498	-0.151421	-0.350819	-0.151421	-0.179906	-0.293848	-0.293848	-0.179906	0.0194919	-0.00899349	0.275861	0.247375	-0.00899349	0.0764628	-0.122935	-0.151421	-0.379304	-0.236877	-0.322333	-0.293848
EMR17008_20170629_S_27B	M	X	L	0.260271	0.260271	0.150755	0.260271	0.424546	0.479304	0.534062	0.753096	0.260271	0.369788	-0.0135203	-0.0135203	-0.0135203	0.150755	-0.0682785	-0.0682785	-0.123037	-0.177795	-0.177795	-0.123037	-0.123037	0.041238	0.369788	0.0959963	0.479304	0.315029	0.315029	0.150755	0.479304	1.02689	1.1364	0.424546	0.205513	0.0959963	-0.123037	-0.0682785	-0.123037	-0.0682785	-0.0682785	-0.177795
EMR17008_20170629_S_29A	M	X	R	0.170237	0.231031	0.0182506	0.13984	0.322223	0.13984	0.231031	0.0486478	-0.133736	0.291826	-0.0729411	0.261428	0.231031	-0.103338	0.109442	-0.19453	0.231031	0.0182506	-0.103338	-0.19453	-0.0121466	-0.376913	-0.19453	-0.103338	0.079045	0.231031	-0.164133	0.109442	0.35262	0.535003	0.0486478	0.231031	-0.224927	0.0182506	0.474209	0.413415	-0.0121466	0.13984	-0.224927	-0.103338
EMR17008_20170629_S_29B	M	X	R	0.10916	-0.175209	0.0143704	0.0143704	-0.0804194	-0.175209	0.10916	-0.0804194	-0.175209	-0.175209	-0.175209	-0.175209	-0.175209	-0.0804194	-0.175209	0.0143704	0.0143704	-0.175209	-0.0804194	-0.175209	-0.175209	-0.175209	-0.175209	0.0143704	0.0143704	-0.0804194	-0.0804194	0.10916	0.0143704	0.10916	-0.175209	-0.0804194	0.10916	0.39353	0.867479	0.39353	0.29874	0.0143704	0.0143704	0.0143704

## Sheet: Saline LP Right
ID	sex	Sidepref	LP	Zscore -3	-2.9	-2.8	-2.7	-2.6	-2.5	-2.4	-2.3	-2.2	-2.1	-2	-1.9	-1.8	-1.7	-1.6	-1.5	-1.4	-1.3	-1.2	-1.1	-1	-0.9	-0.8	-0.7	-0.6	-0.5	-0.4	-0.3	-0.2	-0.1	0	0.1	0.2	0.3	0.4	0.5	0.6	0.7	0.8	0.9
CDH16002_20161017_S_01A	F	X	L	-0.114386	0.20382	-0.250761	-0.0234701	-0.0461991	0.0447171	-0.0916572	-0.182573	-0.182573	0.0447171	-0.137115	-0.205303	-0.114386	-0.27349	-0.409864	-0.137115	-0.341677	-0.296219	-0.250761	-0.27349	-0.114386	-0.0234701	-0.27349	-0.341677	-0.409864	-0.432593	-0.250761	-0.409864	-0.364406	-0.341677	-0.432593	-0.409864	-0.478051	-0.478051	-0.546238	-0.387135	-0.432593	-0.546238	-0.27349	-0.0916572
CDH16002_20161017_S_17A	F		L	-0.0429495	-0.157612	-0.100281	-0.214943	-0.157612	-0.214943	-0.100281	0.129044	-0.0429495	0.0143817	0.186375	0.0717129	0.0717129	0.0717129	0.129044	-0.157612	-0.100281	-0.0429495	-0.0429495	-0.0429495	-0.100281	-0.100281	-0.214943	-0.100281	-0.157612	-0.100281	-0.0429495	-0.100281	0.301038	0.931681	0.931681	0.587694	0.0717129	-0.0429495	-0.100281	-0.214943	-0.100281	0.0143817	-0.214943	-0.157612
CDH16002_20161017_S_19A	F		L	-0.219959	-0.238124	-0.11097	-0.310783	-0.347112	-0.183629	-0.256288	-0.419771	-0.292618	-0.365277	-0.274453	-0.401606	-0.201794	-0.401606	-0.456101	-0.219959	-0.256288	-0.256288	-0.238124	-0.129135	-0.292618	-0.183629	-0.328947	0.143336	0.0706772	-0.1473	-0.365277	-0.456101	-0.619584	-0.52876	-0.583254	-0.510595	-0.510595	-0.474266	-0.0201466	0.161501	0.215995	0.488467	0.815432	0.506631
CDH16003_20161018_S_17A	F	X	R	-0.0841478	-0.0646757	-0.0646757	0.0326851	0.149518	-0.0646757	-0.10362	-0.142564	-0.0646757	-0.0841478	0.227407	0.130046	0.110574	0.0326851	0.227407	0.246879	0.207934	0.402656	0.461072	0.344239	0.227407	0.0911015	-0.0257314	-0.0452035	-0.181509	-0.10362	-0.317814	-0.395702	-0.0841478	-0.181509	0.655794	1.2789	1.55151	0.0716294	0.16899	0.110574	-0.220453	-0.0452035	0.0716294	-0.123092
CDH16005_20161021_S_05A	M	X	L	0.0405724	0.0405724	0.262343	0.262343	0.336266	0.188419	0.114496	0.0405724	0.114496	-0.107275	-0.107275	0.262343	-0.107275	0.188419	-0.0333511	0.0405724	-0.0333511	0.336266	0.114496	0.114496	0.262343	0.41019	-0.0333511	0.262343	0.484113	0.336266	0.558037	-0.0333511	-0.107275	0.262343	0.558037	0.114496	0.484113	0.0405724	0.262343	0.0405724	0.114496	-0.107275	0.188419	-0.181198
CDH16005_20161021_S_07A	M		L	-0.227753	-0.0381218	-0.0855297	-0.227753	0.293734	0.104102	-0.0855297	-0.227753	0.056694	0.198918	-0.0855297	0.056694	-0.0381218	0.388549	-0.0381218	0.104102	-0.0855297	0.198918	-0.0855297	-0.180346	-0.227753	0.00928609	-0.0855297	-0.180346	-0.180346	0.15151	-0.132938	0.00928609	0.056694	0.15151	0.056694	-0.227753	0.00928609	-0.0381218	0.056694	-0.0855297	-0.275161	-0.322569	-0.417385	-0.0381218
CDH16005_20161021_S_07B	M	X	L	-0.134689	-0.232867	-0.478314	-0.257412	-0.331046	-0.576493	-0.306501	-0.0610545	-0.134689	0.184392	0.061669	-0.232867	-0.232867	-0.0119651	-0.159233	0.0371243	-0.0119651	0.0862137	0.0125796	0.159848	0.110758	-0.159233	-0.134689	-0.699217	-0.601038	-0.871029	-0.748306	-0.969208	-0.650127	-0.576493	-0.331046	-0.0365098	0.528018	0.577108	0.331661	0.0371243	0.061669	0.0371243	-0.134689	0.0862137
CDH16005_20161021_S_07C	M	X	L	0.198885	0.321509	-0.0463632	0.15801	0.0762609	0.15801	0.117136	0.485008	0.403258	0.525882	0.0762609	-0.0872379	0.0762609	0.0762609	-0.291611	-0.128113	-0.168987	-0.00548849	0.198885	0.0762609	0.280634	0.23976	0.15801	0.23976	0.321509	0.0762609	0.0762609	0.15801	-0.0463632	-0.0872379	-0.291611	-0.414235	-0.495985	-0.414235	-0.536859	-0.618609	-0.659483	-0.495985	-0.45511	-0.414235
CDH16005_20161021_S_07D	M		L	-0.455674	-0.387739	-0.285835	-0.285835	-0.0820292	-0.421706	-0.387739	-0.387739	-0.489642	-0.2179	-0.285835	-0.387739	-0.285835	-0.251868	-0.421706	-0.421706	-0.251868	-0.251868	-0.115997	-0.115997	-0.251868	-0.0480615	-0.0480615	-0.353771	-0.489642	-0.421706	-0.421706	-0.693448	-0.693448	-0.625512	-0.693448	-0.693448	-0.591545	-0.353771	-0.387739	-0.455674	-0.591545	-0.523609	-0.285835	-0.149965
CDH16005_20161021_S_09A	M		R	0.108093	-0.0390336	0.0590508	-0.0390336	-0.0390336	-0.137118	-0.137118	0.0100086	0.108093	0.108093	0.206177	0.157135	0.255219	0.108093	-0.18616	-0.0390336	0.353304	0.108093	-0.0390336	-0.0390336	0.255219	-0.0390336	-0.0880757	0.0590508	0.206177	0.0100086	-0.235202	0.0590508	0.108093	-0.0880757	0.353304	-0.0390336	-0.0880757	-0.235202	-0.18616	0.0100086	-0.0390336	0.0100086	-0.18616	-0.0880757
CDH16005_20161021_S_09B	M		R	-0.0224237	-0.155553	-0.0889882	0.310399	0.0441408	0.17727	0.243834	0.243834	0.110705	0.0441408	0.443528	0.376964	0.110705	0.443528	0.0441408	0.110705	0.243834	-0.155553	-0.0889882	-0.288682	-0.155553	-0.155553	-0.155553	-0.0889882	0.17727	0.709786	0.376964	0.510093	0.310399	0.17727	-0.0889882	-0.222117	-0.0224237	0.110705	-0.0889882	0.376964	-0.0889882	0.0441408	-0.155553	0.110705
CDH16005_20161021_S_09C	M	X	R	-0.0534896	-0.0534896	-0.106627	-0.000352421	-0.319176	-0.266038	-0.159764	-0.000352421	0.105922	0.0527848	0.105922	-0.106627	-0.000352421	-0.0534896	-0.159764	-0.106627	-0.0534896	-0.212901	-0.106627	-0.212901	-0.000352421	0.212196	0.212196	0.212196	0.424745	0.159059	0.0527848	-0.106627	-0.372313	-0.266038	-0.0534896	-0.000352421	0.105922	-0.159764	-0.212901	-0.319176	-0.319176	-0.319176	-0.159764	-0.319176
CDH16005_20161021_S_09D	M		L	-0.171753	-0.113105	-0.113105	-0.2304	-0.113105	-0.0544568	-0.2304	-0.0544568	-0.0544568	-0.171753	-0.113105	-0.2304	-0.289048	-0.2304	-0.289048	-0.113105	-0.171753	-0.171753	-0.2304	-0.2304	-0.2304	-0.2304	-0.2304	0.00419098	-0.289048	-0.171753	-0.289048	-0.289048	-0.2304	-0.2304	-0.2304	-0.171753	-0.171753	-0.289048	-0.0544568	-0.289048	-0.171753	-0.2304	-0.289048	-0.289048
CDH16005_20161021_S_09E	M		L	0.0494301	0.0494301	-0.111464	-0.111464	-0.0310169	-0.191911	-0.191911	0.0494301	-0.111464	0.129877	-0.111464	0.129877	-0.191911	0.0494301	0.0494301	0.0494301	-0.191911	-0.0310169	-0.272358	0.0494301	-0.272358	-0.0310169	-0.111464	-0.0310169	-0.0310169	0.129877	0.0494301	0.210324	-0.191911	-0.111464	-0.191911	0.0494301	0.0494301	0.371218	0.371218	0.129877	0.210324	-0.111464	-0.0310169	0.129877
CDH16005_20161021_S_13A	M		L	-0.351014	-0.248778	-0.0187459	-0.0187459	0.287963	0.0579315	-0.0954232	-0.044305	0.262404	0.3902	0.160168	0.287963	0.3902	0.569114	0.339082	0.287963	0.160168	0.262404	0.364641	0.0834906	0.10905	-0.0187459	0.0834906	-0.223219	0.0323724	-0.0187459	-0.044305	-0.0698641	-0.376573	-0.606605	-0.325455	-0.120982	-0.0187459	0.517995	0.415759	0.441318	0.236845	0.236845	-0.0954232	-0.044305
CDH16005_20161021_S_15A	M	X	L	-0.0434776	-0.0434776	0.0711237	0.0711237	0.0252832	0.139884	0.116964	0.254486	0.369087	-0.0434776	0.0940439	0.0482034	-0.364361	-0.433122	-0.318521	-0.318521	-0.364361	-0.2956	-0.24976	-0.456042	-0.433122	-0.27268	-0.2956	-0.501883	-0.364361	0.185725	1.12546	1.21714	0.942093	0.598289	0.62121	-0.22684	-0.2956	-0.364361	-0.524803	-0.387281	0.00236291	-0.0205573	-0.158079	-0.135159
CDH16005_20161021_S_15B	M	X	L	0.0580018	-0.209247	0.0580018	0.271801	0.00455205	-0.155797	-0.155797	-0.155797	0.32525	0.164901	-0.0488977	0.00455205	0.32525	0.218351	0.218351	0.3787	-0.0488977	0.699399	0.0580018	0.111452	0.0580018	-0.262697	0.00455205	-0.0488977	-0.0488977	-0.209247	-0.102347	-0.0488977	-0.209247	0.00455205	0.806298	0.539049	1.127	2.19599	2.08909	0.913198	0.271801	0.4856	0.43215	0.164901
CDH16005_20161021_S_15C	M	X	R	0.0245817	-0.0701404	0.150878	0.150878	0.277174	0.0561558	-0.0701404	0.119304	0.119304	0.40347	-0.133289	-0.101714	-0.196437	-0.133289	-0.385881	-0.228011	-0.322733	-0.417455	-0.480603	-0.322733	-0.133289	-0.291159	-0.291159	-0.228011	0.371896	0.940229	1.00338	0.498193	0.466618	0.687637	0.687637	0.813933	-0.196437	-0.512177	-0.385881	-0.417455	-0.480603	-0.0701404	-0.228011	-0.0069923
CDH16005_20161021_S_17A	M	X	L	-0.0111908	0.122341	-0.278254	-0.144723	-0.0779567	0.122341	-0.0111908	-0.0111908	0.322639	-0.0111908	0.389404	0.322639	0.255873	-0.144723	-0.0111908	-0.0779567	-0.144723	-0.144723	-0.144723	-0.0111908	-0.0111908	-0.211488	-0.278254	-0.0111908	0.0555751	-0.0779567	0.189107	-0.211488	-0.0111908	0.189107	0.322639	0.723234	0.255873	0.389404	-0.0779567	-0.0779567	-0.278254	-0.144723	-0.0111908	-0.144723
CDH16005_20161021_S_17B	M		R	0.514132	-0.0241196	0.155298	-0.0241196	0.0356861	0.155298	0.155298	-0.0839253	-0.0839253	-0.0241196	-0.203537	0.0356861	0.155298	-0.0839253	0.514132	0.274909	0.334715	-0.143731	-0.0839253	-0.203537	-0.203537	0.0356861	0.0356861	0.0356861	-0.263342	-0.263342	0.155298	0.813161	0.155298	-0.263342	0.394521	0.0954919	-0.0839253	0.334715	0.155298	0.0356861	-0.143731	-0.0839253	-0.143731	0.0356861
CDH16005_20161021_S_17C	M	X	L	0.0938247	0.330814	0.6468	-0.143165	0.725797	0.409811	0.251818	0.330814	0.330814	-0.0641683	-0.0641683	0.330814	0.0148282	0.0938247	0.488807	0.962786	0.172821	0.488807	0.0148282	0.251818	0.330814	-0.222161	-0.0641683	-0.0641683	-0.143165	-0.143165	-0.222161	-0.222161	-0.0641683	-0.222161	-0.222161	-0.0641683	0.330814	0.0148282	0.330814	0.330814	1.35777	1.43677	1.59476	0.804793
CDH16005_20161021_S_17D	M		R	-0.0560899	0.252916	-0.210593	-0.287845	-0.133341	-0.0560899	0.0211617	-0.210593	-0.0560899	0.175665	0.0984132	0.0211617	0.175665	0.0211617	-0.210593	-0.133341	0.0211617	0.0211617	0.0984132	0.0211617	-0.210593	0.330168	-0.0560899	0.0211617	0.0211617	0.0211617	-0.0560899	-0.210593	-0.210593	-0.133341	0.0211617	-0.0560899	0.330168	0.0984132	-0.0560899	-0.287845	-0.210593	-0.287845	-0.287845	-0.210593
CDH16005_20161021_S_17E	M		L	0.235188	-0.0850337	0.107099	-0.213122	0.363276	0.171144	0.0430549	0.235188	0.0430549	0.427321	-0.213122	-0.213122	-0.213122	0.107099	0.0430549	-0.0209894	-0.0209894	0.171144	-0.0209894	0.107099	0.107099	0.107099	0.171144	-0.0209894	0.107099	-0.277167	0.363276	0.747542	-0.213122	-0.149078	-0.0850337	-0.0209894	-0.277167	-0.0209894	0.0430549	-0.0850337	-0.0850337	-0.0209894	-0.213122	-0.149078
CDH16005_20161021_S_17F	M	X	L	0.000559827	-0.156518	-0.156518	-0.156518	0.000559827	0.000559827	0.157638	0.000559827	0.314716	0.314716	0.628872	-0.156518	-0.156518	0.000559827	0.314716	0.000559827	-0.156518	-0.156518	0.000559827	0.157638	-0.156518	-0.156518	-0.156518	-0.156518	0.157638	0.157638	0.314716	-0.156518	0.157638	0.314716	0.314716	0.471794	0.314716	0.314716	0.157638	0.000559827	-0.156518	-0.156518	-0.156518	0.000559827
CDH16005_20161021_S_21A	M	X	R	-0.106087	-0.165859	-0.016428	0.0732308	-0.135973	0.0433445	-0.135973	-0.285404	-0.285404	-0.195746	-0.345177	-0.225632	-0.255518	-0.524495	-0.673926	-0.40495	-0.554381	-0.255518	-0.40495	-0.195746	-0.195746	-0.165859	0.0732308	0.820388	1.20891	1.47789	0.790501	-0.0762006	-0.703812	-0.584267	-0.554381	-0.315291	0.103117	-0.0463143	-0.016428	-0.135973	-0.225632	-0.315291	-0.375063	-0.345177
CDH16005_20161021_S_21B	M	X	L	0.226085	0.0817651	-0.00482659	0.0817651	0.283812	-0.235738	-0.00482659	0.0240373	0.0529012	0.0529012	0.0817651	0.0529012	0.283812	0.110629	0.34154	0.0817651	-0.0914183	0.139493	0.0529012	0.197221	0.254949	0.283812	0.0529012	0.514724	0.687907	0.918818	0.197221	0.0240373	-0.235738	0.0529012	0.659043	0.976546	0.947682	1.35178	0.889954	0.456996	0.312676	0.399268	0.283812	0.283812
CDH16005_20161021_S_21C	M		L	0.260553	0.199325	0.199325	0.0768707	0.138098	0.138098	0.0768707	0.56669	0.383008	0.444235	0.0768707	0.138098	0.0156433	-0.106811	-0.0455841	-0.106811	-0.106811	-0.0455841	-0.168039	-0.106811	-0.0455841	-0.106811	-0.0455841	-0.0455841	0.0156433	0.138098	0.32178	0.0768707	-0.229266	-0.229266	-0.106811	0.0768707	0.627917	0.138098	0.138098	0.32178	0.0768707	-0.106811	-0.0455841	0.0156433
CDH16005_20161021_S_21D	M		L	-0.0885093	-0.0344928	0.181573	-0.0885093	-0.0344928	0.0195236	0.0195236	-0.0885093	0.181573	0.23559	0.181573	-0.0344928	0.127557	-0.0344928	-0.0344928	0.0195236	0.23559	0.127557	-0.142526	0.0195236	-0.0885093	-0.0885093	-0.142526	0.181573	0.127557	0.451655	0.0735401	-0.0885093	-0.250559	-0.142526	0.0735401	0.23559	0.181573	0.397639	0.451655	0.0735401	-0.0344928	-0.0344928	0.0195236	-0.142526
CDH16005_20161021_S_25A	M	X	L	-0.114312	0.0567811	-0.114312	0.0225625	-0.182749	0.0909997	-0.353842	-0.148531	0.159437	0.0909997	-0.0116561	0.33053	-0.251186	0.0567811	-0.148531	-0.114312	-0.0800934	0.193656	0.0909997	0.0225625	0.262093	0.0225625	0.706935	0.193656	0.33053	0.467405	0.433186	0.159437	0.0225625	-0.251186	-0.251186	-0.0800934	-0.251186	-0.0458748	-0.182749	-0.353842	-0.0116561	-0.285405	-0.216968	-0.114312
CDH16005_20161021_S_25B	M		L	-0.229217	-0.272422	-0.099602	-0.207614	-0.121204	0.0516151	-0.164409	-0.099602	0.0300127	-0.250819	-0.229217	-0.337229	-0.423639	-0.488446	-0.769278	-0.70447	-0.596458	-0.769278	-0.445241	-0.445241	-0.380434	-0.142807	0.26764	0.0732176	0.09482	-0.402036	-0.402036	-0.639663	-0.423639	-0.315626	-0.466844	-0.661266	-0.380434	-0.639663	-0.747675	-0.812483	-0.812483	-0.812483	-0.769278	-0.682868
CDH16005_20161021_S_25C	M		L	0.494402	0.604287	0.549345	0.93394	0.549345	0.741642	1.0713	0.714171	0.961411	0.851526	0.878997	0.357047	-0.0824901	-0.137432	-0.137432	-0.32973	-0.357201	-0.137432	-7.68648e-05	-0.0275479	0.0823364	0.192221	0.549345	1.37348	0.741642	0.6867	-7.68648e-05	-0.137432	0.137279	0.302105	-7.68648e-05	-0.164903	-0.219845	-0.164903	-0.302259	-0.384672	-0.384672	-0.494556	-0.439614	-0.274788
CDH16005_20161021_S_25D	M		L	-0.420991	-0.289067	-0.486953	-0.355029	-0.289067	-0.464965	-0.486953	-0.442978	-0.223105	-0.201118	-0.201118	-0.223105	-0.377016	-0.223105	-0.377016	-0.333042	-0.399004	-0.201118	-0.26708	-0.113169	-0.289067	-0.26708	-0.377016	-0.223105	-0.311055	-0.333042	-0.552914	-0.486953	-0.442978	-0.486953	-0.442978	-0.442978	-0.50894	-0.574902	-0.442978	-0.530927	-0.420991	-0.530927	-0.552914	-0.50894
CDH16005_20161021_S_25E	M		L	0.271401	0.222961	0.36828	0.271401	0.562038	0.416719	0.562038	0.465159	0.31984	0.31984	0.126082	0.31984	0.416719	0.0776427	-0.0192363	-0.261434	-0.309873	-0.0676758	0.31984	0.416719	0.852675	0.562038	0.997994	0.755796	1.19175	0.513598	0.31984	0.174522	-0.0676758	0.0292032	0.222961	0.0292032	0.31984	-0.164555	-0.0676758	-0.261434	-0.309873	-0.309873	-0.212994	-0.212994
CDH16005_20161021_S_31A	M	X	L	0.0332888	-0.00680223	0.0332888	0.0733799	0.273835	-0.28744	0.0332888	-0.00680223	-0.167166	-0.127075	-0.0869843	0.233744	-0.207257	0.0332888	-0.00680223	0.47429	0.113471	0.0733799	0.434199	0.273835	0.47429	0.354017	0.313926	0.0733799	0.193653	0.153562	0.113471	0.233744	-0.0468933	0.113471	-0.167166	-0.247349	-0.0869843	-0.447804	-0.327531	-0.327531	-0.327531	-0.447804	-0.167166	-0.167166
CDH16008_20161019_S_09A	M			0.303482	-0.0391948	0.00975908	0.303482	-0.0391948	-0.0391948	0.450344	0.205575	0.352436	0.156621	0.107667	-0.23501	0.205575	0.107667	0.00975908	0.156621	0.254529	-0.186057	0.107667	0.205575	0.00975908	0.205575	-0.0391948	-0.0881487	0.303482	0.499298	-0.0391948	-0.23501	0.841975	1.28256	0.40139	0.107667	-0.0391948	-0.0391948	-0.0391948	-0.137103	-0.0391948	0.058713	0.107667	-0.0391948
CDH16008_20161019_S_23A	M		L	0.0792462	-0.0398531	0.396844	0.0792462	0.277745	-0.0398531	-0.158952	0.198345	0.158646	-0.0795529	-0.158952	0.158646	-0.158952	-0.119253	-0.000153349	-0.0398531	0.0395464	-0.0398531	-0.238352	0.0792462	-0.000153349	-0.0398531	0.0395464	-0.278052	-0.0398531	0.357144	0.238045	0.0395464	-0.198652	-0.357451	0.0792462	0.118946	-0.119253	-0.119253	0.0792462	0.555643	0.198345	0.277745	0.436544	0.357144
CDH16010_20161025_S_01A	F	X	R	0.1023	-0.0600042	-0.0194281	-0.0600042	-0.181732	0.0211479	-0.0600042	-0.10058	-0.0600042	-0.0600042	-0.181732	0.0211479	0.142876	0.061724	-0.10058	0.224028	0.0211479	-0.0600042	-0.181732	0.0211479	0.224028	0.061724	0.1023	0.345756	0.589213	0.954397	0.467485	0.183452	-0.425189	-0.303461	-0.10058	-0.222308	-0.344037	0.386332	0.426909	0.061724	0.386332	0.30518	0.1023	0.142876
CDH16010_20161025_S_01B	F		R	-0.205478	-0.277884	-0.205478	-0.205478	-0.205478	0.0841474	-0.0606653	-0.0606653	-0.277884	0.0841474	0.156554	-0.205478	-0.205478	-0.277884	-0.205478	-0.205478	0.0841474	0.0117411	-0.205478	-0.205478	-0.277884	-0.277884	-0.277884	-0.0606653	-0.133072	0.0117411	0.301367	-0.133072	0.0117411	-0.205478	0.22896	0.518586	0.446179	0.301367	0.22896	0.301367	-0.133072	-0.133072	-0.205478	-0.205478
CDH16010_20161025_S_05A	F	X	R	-0.219844	-0.16526	-0.192552	-0.00150544	0.0257869	-0.00150544	-0.16526	-0.137967	-0.329014	-0.219844	-0.274429	-0.301722	-0.247137	-0.0833826	-0.0287978	-0.16526	0.0257869	-0.16526	-0.110675	-0.301722	-0.16526	-0.356306	-0.329014	-0.00150544	-0.383599	-0.0287978	-0.137967	-0.356306	-0.356306	-0.301722	-0.110675	-0.16526	-0.192552	-0.0833826	-0.137967	-0.137967	-0.329014	-0.301722	-0.110675	-0.16526
CDH16010_20161025_S_05B	F	X	R	0.160578	0.0592599	0.160578	-0.194036	0.160578	0.515192	0.00860078	-0.244695	0.109919	0.109919	-0.0927175	0.0592599	0.160578	-0.143377	0.109919	0.312556	0.00860078	-0.0420583	0.0592599	0.312556	-0.143377	0.211237	-0.0927175	-0.0420583	-0.346013	0.0592599	-0.295354	0.160578	0.464533	0.464533	0.667169	0.0592599	-0.143377	-0.0927175	0.109919	0.109919	0.211237	0.312556	0.261896	0.0592599
CDH16010_20161025_S_07A	F		L	-0.317468	-0.223918	-0.255102	-0.192735	-0.348651	-0.00563536	-0.317468	-0.0991852	-0.161552	-0.255102	-0.130368	-0.0680019	-0.223918	-0.286285	-0.161552	-0.255102	-0.0991852	-0.161552	-0.255102	-0.348651	-0.317468	-0.379835	-0.255102	-0.286285	-0.379835	-0.473384	-0.504568	-0.535751	-0.566934	-0.566934	-0.473384	-0.566934	-0.379835	-0.504568	-0.535751	-0.411018	-0.317468	-0.130368	-0.00563536	0.243831
CDH16010_20161025_S_07B	F	X	R	0.0924828	0.133485	-0.194531	0.0104789	0.0104789	0.0924828	-0.030523	-0.194531	0.0104789	-0.153529	0.502502	0.379496	-0.194531	0.0514809	0.0514809	0.133485	0.174487	0.256491	0.420498	0.379496	0.912521	1.32254	1.52755	1.40454	1.69156	1.65056	1.69156	0.830517	0.4615	0.338494	0.215489	0.133485	0.133485	0.174487	0.379496	0.625508	0.543504	0.66651	0.748514	0.789516
CDH16010_20161025_S_11A	F	X	R	-0.101969	-0.0111712	-0.101969	0.579014	0.125025	0.397419	0.170424	0.215823	-0.0111712	0.125025	0.0342277	-0.101969	0.261222	0.261222	-0.0111712	0.125025	0.170424	0.0342277	-0.283565	0.0342277	0.215823	0.488217	0.306621	-0.0111712	-0.101969	0.125025	0.0342277	0.261222	0.261222	0.170424	0.0342277	0.488217	0.0342277	0.261222	0.125025	0.0796265	-0.101969	-0.147368	0.215823	-0.192767
CDH16010_20161025_S_13A	F		R	-0.198826	-0.198826	0.0864733	0.371773	0.0294134	0.200593	0.143533	0.200593	0.0864733	-0.0847065	0.200593	0.371773	0.0864733	-0.0847065	0.428833	-0.198826	0.0294134	-0.0847065	0.143533	0.0864733	-0.0847065	0.0294134	-0.198826	0.0294134	0.257653	0.257653	0.200593	0.428833	-0.198826	0.0864733	-0.0847065	-0.198826	-0.198826	-0.0276466	0.143533	0.143533	-0.255886	-0.0276466	-0.0276466	0.143533
CDH16010_20161025_S_15A	F	X	L	0.00261702	-0.0425656	0.00261702	-0.0425656	-0.178114	0.0477997	-0.223296	-0.0877483	0.0929823	-0.223296	-0.268479	-0.268479	-0.223296	-0.358844	-0.268479	-0.313662	-0.358844	-0.313662	-0.178114	-0.44921	-0.404027	-0.404027	-0.44921	-0.44921	-0.44921	-0.44921	-0.44921	-0.44921	-0.494392	-0.404027	-0.494392	-0.44921	-0.358844	-0.223296	-0.223296	-0.404027	-0.178114	-0.44921	-0.404027	-0.268479
CDH16010_20161025_S_17A	F		R	-0.127423	-0.285195	-0.166866	-0.206309	-0.285195	-0.364081	-0.245752	-0.127423	-0.403524	-0.245752	-0.285195	-0.127423	-0.206309	-0.127423	-0.127423	-0.0879803	-0.0879803	-0.0485374	-0.166866	-0.364081	-0.00909447	-0.245752	-0.245752	-0.00909447	0.0303485	0.148677	-0.00909447	-0.00909447	-0.0879803	-0.245752	0.227563	0.227563	0.18812	0.0697914	0.148677	-0.0485374	-0.0879803	-0.166866	-0.442967	-0.324638
CDH16010_20161025_S_17B	F	X	R	-0.207025	0.0573497	-0.207025	-0.00874404	-0.0748378	-0.0417909	-0.107885	0.0573497	-0.0417909	0.0243028	0.0573497	0.0573497	-0.107885	-0.00874404	-0.107885	0.222584	-0.173978	-0.0748378	-0.0748378	-0.173978	-0.107885	-0.00874404	-0.0748378	-0.0417909	0.0243028	-0.0417909	0.123444	0.0243028	-0.273119	0.520006	0.520006	0.255631	0.420866	-0.0748378	-0.173978	0.387819	0.387819	0.751334	0.619147	0.751334
CDH16010_20161025_S_21A	F	X	R	-0.16155	-0.240859	-0.135114	-0.135114	-0.029368	-0.267296	-0.135114	-0.16155	-0.320168	-0.240859	-0.00293156	-0.108677	-0.214423	-0.293732	-0.267296	-0.16155	0.0763776	0.0763776	-0.214423	-0.0558044	-0.108677	-0.187986	0.446487	0.20856	0.578669	-0.00293156	-0.187986	-0.108677	-0.240859	-0.0822408	-0.16155	0.155687	0.182123	0.155687	-0.214423	0.0499412	-0.029368	-0.0558044	-0.0822408	0.261432
CDH16010_20161025_S_21B	F	X	R	0.325055	0.17253	0.17253	0.121688	0.325055	-0.157942	0.0454253	0.121688	-0.183362	-0.132521	0.0454253	0.0708461	-0.259625	0.350475	0.121688	0.350475	0.121688	0.0200044	0.0454253	-0.00541642	-0.0308373	-0.0562581	-0.157942	-0.208783	-0.0562581	-0.132521	-0.462992	-0.386729	-0.285046	-0.310467	-0.183362	0.0200044	-0.0308373	-0.1071	0.121688	-0.259625	-0.0562581	-0.0562581	0.19795	0.096267
CDH16010_20161025_S_23A	F	X	R	0.0588166	0.375501	0.137988	0.560234	0.29633	0.32272	0.243549	0.454672	0.613014	0.401891	0.164378	0.375501	0.692185	0.29633	0.0324262	0.243549	0.375501	0.29633	0.401891	0.0324262	-0.0467449	-0.178697	0.0588166	0.190768	0.111597	0.137988	0.349111	0.137988	0.190768	1.00887	0.665795	0.718576	0.929699	1.11443	0.98248	0.639405	0.428282	0.349111	0.507453	0.428282
CDH16010_20161025_S_23B	F	X	R	0.129294	0.429834	0.229474	0.19608	0.0625067	0.663588	0.19608	0.296261	0.463228	0.763769	0.563408	0.663588	0.630195	0.530015	0.563408	0.329654	0.129294	0.329654	0.797162	0.663588	0.730375	0.596802	0.396441	0.396441	-0.171247	-0.171247	-0.204641	-0.204641	0.296261	0.630195	1.36485	1.16449	0.797162	0.730375	0.229474	0.19608	-0.0376736	-0.271428	-0.338215	-0.371608
CDH16010_20161025_S_23C	F		R	0.121585	0.0654363	0.149659	-0.0468606	-0.159157	0.0654363	-0.0187864	-0.24338	0.0654363	0.177733	0.233882	-0.187232	-0.327603	-0.24338	-0.0749348	-0.103009	-0.0468606	-0.159157	0.0373621	0.0373621	-0.131083	-0.0749348	0.0373621	0.149659	0.402327	0.486549	-0.159157	-0.0468606	0.261956	0.205807	0.458475	0.570772	0.29003	-0.0749348	-0.103009	0.0654363	0.0935105	0.29003	0.374253	0.205807
CDH16010_20161025_S_23D	F	X	L	-0.211223	0.00650096	-0.0297864	-0.320085	-0.0660738	-0.0297864	-0.428947	-0.102361	0.00650096	-0.0660738	0.115363	-0.174936	-0.138648	-0.102361	-0.138648	-0.174936	-0.174936	-0.0297864	0.0427883	0.0427883	0.0427883	0.187938	-0.138648	0.115363	-0.247511	0.115363	-0.0297864	0.00650096	-0.102361	-0.0660738	-0.283798	-0.138648	0.00650096	-0.247511	-0.174936	0.0427883	0.0427883	-0.138648	-0.320085	-0.138648
CDH16010_20161025_S_25A	F	X	R	-0.194389	-0.269365	-0.0819252	-0.344341	-0.306853	0.180491	-0.156901	-0.0444372	-0.419318	-0.194389	-0.231877	-0.269365	-0.269365	-0.156901	-0.306853	-0.231877	-0.231877	-0.419318	-0.38183	-0.419318	-0.456806	-0.38183	-0.344341	-0.38183	-0.38183	-0.269365	-0.419318	-0.456806	-0.494294	-0.456806	-0.719222	-0.419318	-0.306853	-0.00694916	0.180491	0.592859	0.405419	0.217979	0.217979	-0.00694916
CDH16010_20161025_S_25B	F	X	L	-0.27482	-0.312217	-0.162627	-0.0504347	-0.0878321	-0.237422	-0.12523	-0.200025	-0.0504347	-0.162627	-0.162627	-0.200025	-0.0878321	-0.27482	-0.312217	-0.27482	-0.162627	-0.162627	-0.200025	-0.312217	-0.349614	-0.27482	-0.312217	-0.387012	-0.27482	-0.349614	-0.162627	-0.312217	-0.12523	-0.27482	-0.12523	0.0991553	0.286143	0.0617578	0.47313	0.17395	-0.0878321	-0.0878321	-0.12523	-0.349614
CDH16010_20161025_S_25C	F	X	R	-0.00161126	-0.261931	0.0309287	0.0309287	0.0634686	-0.196851	0.0634686	-0.164311	-0.164311	-0.294471	-0.0341512	-0.131771	0.0960086	-0.0341512	-0.131771	-0.0992311	-0.0992311	-0.48971	-0.261931	-0.196851	-0.131771	-0.261931	-0.229391	-0.00161126	0.0309287	-0.0666911	-0.55479	-0.45717	-0.359551	-0.48971	-0.294471	-0.0992311	0.128549	0.0309287	0.0634686	0.0960086	0.128549	0.0634686	0.0309287	-0.196851
CDH16010_20161025_S_25D	F	X	L	-0.265795	-0.381375	-0.535482	-0.419902	-0.419902	-0.419902	-0.496956	-0.458429	-0.419902	-0.496956	-0.419902	-0.535482	-0.458429	-0.419902	-0.496956	-0.458429	-0.458429	-0.458429	-0.458429	-0.458429	-0.535482	-0.535482	-0.458429	-0.496956	-0.496956	-0.535482	-0.535482	-0.496956	-0.535482	-0.496956	-0.496956	-0.535482	-0.496956	-0.496956	-0.458429	-0.458429	-0.496956	-0.496956	-0.342848	-0.419902
CDH16010_20161025_S_25E	F		R	-0.295524	-0.295524	-0.186979	0.0662929	-0.0422522	0.102475	-0.0422522	-0.0784338	0.102475	-0.00607048	-0.186979	0.0301112	-0.0422522	0.247201	-0.00607048	-0.00607048	0.102475	-0.00607048	-0.114616	-0.295524	0.247201	-0.295524	-0.259342	-0.186979	-0.331706	-0.0784338	-0.00607048	-0.331706	-0.440251	-0.440251	-0.0422522	0.319565	1.15174	1.29647	1.54974	1.8392	1.47738	1.11556	1.00702	0.42811
CDH16010_20161025_S_27A	F	X	R	0.416684	0.247895	0.838657	0.0369087	0.754262	0.33229	0.501079	0.501079	0.458882	0.627671	0.669868	0.416684	0.458882	0.501079	0.416684	0.712065	0.501079	0.543276	0.627671	0.754262	0.33229	0.163501	-0.0474858	0.121303	-0.00528853	-0.216275	0.079106	0.163501	0.247895	0.121303	0.458882	0.374487	0.0369087	0.501079	0.543276	0.712065	0.627671	0.501079	0.627671	0.712065
CDH16010_20161025_S_27B	F	X	L	0.540672	0.438373	0.711171	0.404273	0.506572	0.506572	0.574772	0.472472	0.472472	0.233774	0.574772	0.574772	0.438373	0.472472	0.438373	0.81347	0.574772	0.233774	0.472472	0.438373	0.472472	0.370173	0.0291753	0.0291753	-0.311822	-0.209523	-0.0390242	0.199674	0.233774	0.608872	0.84757	0.81347	0.199674	0.0973749	0.199674	0.131475	-0.00492446	0.438373	0.711171	0.745271
CDH16010_20161025_S_27C	F	X	R	-0.0763721	0.132936	-0.118234	0.0492126	-0.0763721	0.00735105	0.0910742	0.0492126	-0.0763721	-0.118234	-0.201957	-0.0763721	0.216659	-0.160095	-0.0345105	0.00735105	0.0492126	-0.201957	0.00735105	0.00735105	0.216659	0.132936	0.425967	0.216659	0.425967	0.593413	0.802721	0.00735105	0.0910742	0.174797	-0.0763721	0.00735105	-0.160095	-0.201957	-0.0345105	0.0910742	-0.118234	0.174797	0.425967	0.00735105
CDH16010_20161025_S_27D	F		R	-0.106379	0.293306	-0.00645747	-0.00645747	0.193385	0.293306	-0.00645747	0.0934637	0.293306	0.0435031	-0.156339	-0.2063	-0.00645747	-0.2063	-0.00645747	0.0435031	-0.156339	0.0435031	-0.00645747	-0.0564181	-0.106379	-0.2063	-0.0564181	-0.2063	-0.256261	-0.256261	-0.2063	-0.106379	-0.2063	-0.00645747	-0.306221	-0.306221	-0.256261	-0.256261	-0.256261	-0.2063	-0.156339	-0.2063	0.193385	0.0934637
CDH16010_20161025_S_27E	F	X	R	-0.0797281	-0.144984	-0.0797281	-0.0471003	-0.112356	-0.0144725	0.0834109	0.0507831	0.0507831	-0.242867	-0.0471003	-0.177612	0.0507831	0.24655	0.148667	-0.210239	0.0834109	0.0834109	0.0834109	0.148667	0.0507831	0.213922	0.279178	0.279178	0.83385	0.735967	0.768595	0.801223	1.29064	1.3559	0.899106	0.964362	0.605456	0.964362	1.09487	1.06225	0.931734	0.801223	0.507572	0.377061
CDH16010_20161025_S_29A	F		R	-0.198998	-0.133336	-0.166167	0.0308164	-0.0676753	-0.100506	-0.0676753	-0.166167	-0.395981	-0.198998	-0.100506	-0.264659	-0.231828	-0.00201417	-0.166167	-0.133336	-0.231828	-0.231828	-0.166167	-0.395981	-0.133336	-0.33032	-0.0348447	-0.264659	-0.231828	0.0964776	0.26063	-0.36315	-0.395981	-0.494473	-0.494473	-0.428812	-0.625795	-0.494473	-0.560134	-0.560134	-0.33032	0.0964776	-0.00201417	-0.133336
CDH16010_20161025_S_29B	F	X	L	0.110067	-0.174519	-0.096905	0.16181	0.239424	0.0583239	0.187681	-0.096905	0.00658092	0.0324524	-0.0710335	0.0324524	0.00658092	0.16181	0.187681	0.110067	-0.045162	0.187681	-0.174519	0.0324524	-0.045162	-0.045162	-0.329748	-0.226262	-0.53672	-0.562592	-0.53672	-0.433234	0.110067	0.00658092	0.110067	0.110067	-0.045162	0.0324524	-0.148648	0.317039	0.265296	0.498139	0.420525	0.239424
CDH16011_20161027_S_09A	F	X	L	0.0892603	0.030553	0.382797	0.030553	0.0892603	0.147968	0.265382	0.0892603	-0.0868617	-0.321691	-0.321691	-0.204276	-0.204276	0.030553	-0.204276	0.0892603	-0.321691	0.147968	0.0892603	0.0892603	0.030553	0.558919	0.265382	0.265382	-0.0868617	-0.321691	-0.439106	-0.145569	-0.321691	-0.0868617	0.500212	0.793748	0.441504	0.0892603	0.96987	0.735041	0.265382	0.265382	0.32409	0.441504
CDH16011_20161027_S_15A	F	X	L	0.675684	0.708551	0.412749	0.609951	0.872886	0.971486	0.609951	0.938619	0.840019	0.642818	0.51135	0.708551	0.51135	0.281282	-0.376056	-0.244588	-0.54039	-0.376056	-0.0473869	0.0840806	0.215548	0.116947	0.149814	-0.211721	-0.573257	-0.441789	0.0840806	0.116947	0.0183469	0.51135	1.00435	0.938619	1.62882	1.53022	1.13582	0.379883	0.675684	0.741418	0.379883	0.116947
CDH16011_20161027_S_29A	F	X	R	-0.188045	-0.102905	-0.273185	0.152514	0.0673742	-0.273185	-0.188045	-0.102905	-0.102905	-0.358325	-0.358325	-0.102905	-0.358325	-0.0177656	-0.102905	-0.0177656	-0.102905	0.0673742	0.152514	-0.188045	-0.188045	-0.0177656	0.152514	0.152514	0.152514	0.0673742	-0.102905	-0.102905	-0.273185	-0.273185	-0.358325	-0.358325	-0.188045	-0.358325	-0.358325	-0.102905	-0.102905	-0.0177656	-0.188045	-0.0177656
CDH16011_20161027_S_31A	F	X	L	-0.108664	0.110218	-0.218104	0.219658	0.329099	-0.327545	0.43854	0.110218	0.110218	-0.218104	0.000776976	0.110218	-0.108664	-0.218104	-0.327545	-0.327545	0.000776976	-0.327545	-0.218104	-0.218104	0.110218	-0.108664	-0.327545	-0.108664	0.000776976	0.657421	0.657421	0.54798	0.766862	1.09518	0.000776976	0.219658	0.219658	0.110218	-0.218104	-0.108664	-0.218104	0.000776976	-0.108664	0.000776976
CDH169019_20161018_S_01A	M	X	R	-0.0240131	-0.042676	-0.0986646	-0.13599	-0.0613388	-0.117327	-0.117327	-0.229305	-0.0613388	-0.13599	-0.13599	-0.26663	0.0319755	-0.154653	-0.0240131	0.143953	-0.117327	0.0879642	0.274593	0.237267	0.199941	0.199941	0.405233	0.0133127	0.423896	0.106627	0.274593	0.218604	0.0506384	0.25593	-0.13599	0.0506384	0.237267	-0.0613388	-0.229305	-0.229305	-0.0613388	-0.191979	-0.210642	-0.13599
CDH169019_20161018_S_03A	M	X	R	-0.109797	0.0986091	-0.0403281	-0.144531	-0.0055938	0.0291405	0.168078	-0.109797	0.0986091	-0.214	-0.144531	-0.0750624	0.0986091	-0.179265	-0.109797	-0.109797	-0.0750624	-0.0750624	-0.109797	-0.248734	-0.248734	-0.179265	-0.109797	-0.248734	-0.0403281	-0.318202	-0.0750624	-0.283468	-0.318202	-0.387671	-0.179265	-0.422405	-0.248734	-0.248734	-0.179265	0.0986091	0.0638748	0.0986091	0.237546	0.272281
CDH169019_20161018_S_05A	M	X	L	-0.0862214	0.110295	0.0822208	-0.030074	0.222589	0.0541471	-0.0581477	0.0541471	0.0822208	0.447179	0.194516	0.0260734	0.110295	0.138368	-0.170442	-0.170442	-0.0862214	-0.310811	-0.254664	-0.282737	-0.310811	-0.338885	-0.423106	-0.198516	-0.282737	-0.366958	-0.142369	-0.198516	-0.282737	-0.170442	-0.338885	-0.0862214	-0.030074	0.278737	0.475253	0.5314	1.09287	0.643695	0.615621	0.924432
CDH169019_20161018_S_09A	M	X	R	-0.029755	0.042841	-0.0539536	-0.0781523	-0.12655	-0.150748	-0.00555634	0.0186423	-0.223344	-0.199146	-0.199146	-0.12655	-0.344337	-0.368536	-0.223344	-0.29594	-0.271742	-0.416933	-0.465331	-0.29594	-0.392735	-0.368536	-0.489529	-0.271742	-0.223344	-0.174947	-0.441132	-0.537927	-0.513728	-0.634721	-0.586324	-0.489529	-0.392735	-0.199146	-0.271742	-0.29594	-0.102351	-0.29594	-0.271742	-0.29594
CDH169019_20161018_S_09B	M	X	L	-0.123485	-0.207059	-0.0677695	0.0158043	0.0158043	0.127236	-0.207059	0.0436623	-0.0956274	0.0158043	-0.318491	-0.0399116	-0.0120536	0.155094	-0.207059	0.0436623	-0.346349	-0.262775	-0.290633	-0.0677695	-0.262775	-0.457781	-0.457781	-0.569212	-0.652786	-0.485639	-0.569212	-0.624928	-0.569212	-0.680644	-0.513497	-0.569212	-0.513497	-0.59707	-0.429923	-0.457781	-0.262775	0.0158043	0.377958	0.322242
CDH169019_20161018_S_09C	M	X	L	0.255224	0.0750159	0.115062	-0.0851694	-0.0651462	0.155109	0.195155	-0.125216	0.255224	0.195155	0.175132	0.0750159	-0.0651462	-0.105193	-0.00507673	-0.0250999	0.0549927	-0.125216	-0.0851694	-0.265378	-0.285401	-0.265378	-0.445586	-0.545702	-0.485633	-0.445586	-0.34547	-0.585748	-0.525679	-0.545702	-0.40554	-0.125216	-0.00507673	-0.0851694	0.41541	0.455456	0.35534	0.515525	0.695734	0.835896
CDH169019_20161018_S_21A	M	X	R	-0.0877788	-0.0351178	-0.16677	-0.114109	-0.114109	-0.298423	-0.14044	-0.219431	-0.00878736	-0.0614483	0.0965346	-0.14044	-0.114109	0.0702041	0.0175431	0.149196	0.228187	0.359839	0.596814	0.465161	0.623144	0.702136	0.649475	0.623144	0.491492	0.570483	0.333509	0.228187	0.0702041	0.122865	-0.0877788	-0.377414	-0.324753	-0.482736	-0.456406	-0.482736	-0.351084	-0.456406	-0.430075	-0.403745
CDH169019_20161018_S_25A	M	X	L	-0.0258585	-0.104526	-0.183194	-0.0258585	-0.0651922	0.0134753	0.131477	-0.0651922	-0.0258585	-0.0258585	0.0134753	0.446147	0.170811	0.131477	0.0528091	0.131477	0.131477	0.249478	0.642816	0.564148	0.367479	-0.0258585	0.0921429	-0.0258585	0.0134753	-0.340529	-0.379863	-0.379863	-0.183194	-0.0258585	0.0528091	-0.14386	-0.104526	0.0528091	0.131477	0.0134753	-0.14386	-0.104526	0.170811	-0.0258585
EMR17001_20170705_S_03A	F	X	L	0.0144069	0.184087	0.353768	0.608289	0.353768	0.353768	0.0144069	0.184087	-0.240114	0.0144069	0.438608	0.184087	0.184087	0.0992471	0.0144069	0.0992471	0.438608	0.0144069	0.438608	0.184087	0.0144069	0.268928	0.0992471	0.353768	0.184087	1.03249	0.184087	0.184087	0.523448	0.608289	0.523448	0.353768	0.0992471	0.693129	0.0144069	0.523448	-0.155274	-0.155274	0.184087	-0.0704333
EMR17001_20170705_S_07A	F	X	L	0.161745	0.455193	0.601918	0.161745	0.895366	0.455193	0.308469	0.601918	0.601918	0.601918	0.161745	0.0150203	-0.131704	0.161745	0.308469	0.0150203	0.0150203	0.308469	-0.131704	0.0150203	0.308469	0.0150203	-0.131704	-0.131704	-0.278428	0.161745	-0.131704	-0.278428	-0.278428	0.455193	0.0150203	-0.131704	-0.278428	-0.278428	-0.278428	-0.131704	0.0150203	0.0150203	0.455193	0.308469
EMR17001_20170705_S_07B	F		R	-0.01983	-0.221636	-0.01983	0.383782	-0.01983	-0.221636	-0.01983	-0.01983	-0.221636	-0.01983	0.383782	-0.01983	-0.01983	-0.01983	-0.01983	0.181976	-0.01983	0.181976	-0.01983	0.585588	0.181976	0.383782	0.181976	-0.01983	-0.221636	0.181976	-0.221636	-0.221636	-0.221636	-0.221636	-0.221636	-0.221636	-0.221636	-0.221636	-0.01983	-0.221636	0.585588	0.585588	1.39281	0.181976
EMR17001_20170705_S_09A	F	X	L	0.14748	0.401801	0.656122	0.783282	1.0376	0.401801	0.528961	0.401801	0.783282	0.274641	0.14748	0.02032	-0.10684	-0.10684	-0.234001	-0.234001	-0.234001	-0.234001	-0.234001	-0.234001	-0.234001	-0.10684	-0.234001	-0.234001	-0.234001	-0.234001	-0.234001	-0.234001	-0.234001	-0.234001	-0.234001	-0.234001	-0.234001	-0.234001	-0.234001	-0.234001	-0.234001	-0.10684	-0.10684	-0.234001
EMR17001_20170705_S_09B	F	X	L	0.217056	0.422518	-0.193868	0.0115937	0.62798	0.0115937	-0.193868	0.0115937	0.422518	0.833442	0.0115937	-0.193868	0.217056	0.0115937	0.0115937	-0.193868	0.0115937	-0.193868	-0.193868	0.0115937	-0.193868	-0.193868	-0.193868	-0.193868	-0.193868	0.0115937	0.0115937	-0.193868	0.217056	0.422518	0.0115937	-0.193868	0.0115937	0.0115937	0.0115937	-0.193868	-0.193868	-0.193868	0.0115937	-0.193868
EMR17001_20170705_S_11A	F		L	-0.197647	-0.197647	-0.197647	0.247771	-0.197647	0.47048	-0.197647	-0.197647	-0.197647	0.0250619	-0.197647	0.0250619	0.0250619	-0.197647	0.0250619	0.247771	0.247771	0.0250619	-0.197647	-0.197647	0.47048	0.247771	-0.197647	0.0250619	0.0250619	-0.197647	-0.197647	0.47048	0.47048	0.247771	0.0250619	-0.197647	0.69319	0.247771	-0.197647	0.0250619	0.247771	0.0250619	-0.197647	0.0250619
EMR17001_20170705_S_15A	F	X		-0.444552	-0.444552	-0.444552	-0.444552	-0.444552	-0.444552	-0.444552	-0.444552	-0.444552	-0.444552	-0.444552	-0.444552	-0.444552	-0.444552	-0.444552	-0.444552	-0.444552	-0.444552	-0.444552	-0.444552	-0.444552	-0.444552	-0.444552	-0.444552	-0.444552	-0.444552	-0.444552	-0.444552	-0.444552	-0.444552	-0.444552	-0.444552	-0.444552	-0.444552	-0.444552	-0.444552	-0.444552	-0.444552	-0.444552	-0.444552
EMR17001_20170705_S_15B	F			-0.159794	-0.159794	-0.159794	-0.159794	-0.159794	-0.159794	-0.159794	-0.159794	-0.159794	-0.159794	-0.159794	-0.159794	-0.159794	-0.159794	-0.159794	-0.159794	-0.159794	-0.159794	-0.159794	-0.159794	-0.159794	-0.159794	-0.159794	-0.159794	-0.159794	-0.159794	-0.159794	-0.159794	-0.159794	-0.159794	-0.159794	-0.159794	-0.159794	-0.159794	-0.159794	-0.159794	-0.159794	-0.159794	-0.159794	-0.159794
EMR17001_20170705_S_15C	F	X	R	0.505937	0.385307	0.0837325	0.0234176	0.144047	0.144047	0.0234176	-0.0368973	0.144047	0.0837325	0.0837325	0.385307	0.204362	0.264677	0.204362	0.505937	0.264677	0.204362	0.324992	0.807511	0.747196	2.19475	2.97885	2.85822	3.34074	4.96924	4.12483	4.12483	3.70263	4.18515	3.94389	4.0042	2.73759	1.47098	0.807511	0.686881	0.505937	0.686881	0.324992	0.385307
EMR17001_20170705_S_17A	F	X	L	0.094178	0.485161	0.094178	0.485161	0.094178	0.172375	0.094178	0.094178	0.0159814	0.328768	0.328768	0.094178	0.172375	0.406964	0.328768	-0.0622152	0.172375	0.406964	0.0159814	0.094178	0.0159814	0.797947	0.328768	0.0159814	0.328768	0.172375	0.406964	0.406964	0.719751	0.797947	0.406964	0.406964	0.797947	0.406964	-0.0622152	0.250571	-0.218608	-0.140412	0.094178	-0.218608
EMR17001_20170705_S_17B	F		L	-0.369107	-0.369107	-0.267844	-0.16658	-0.16658	-0.16658	-0.267844	-0.0653161	-0.267844	0.0359477	-0.267844	-0.369107	-0.369107	-0.16658	-0.267844	-0.267844	-0.369107	-0.369107	-0.267844	-0.369107	-0.369107	-0.369107	-0.369107	-0.369107	-0.369107	-0.267844	-0.267844	-0.16658	-0.369107	-0.267844	-0.369107	-0.369107	-0.267844	-0.369107	-0.16658	-0.0653161	-0.267844	-0.369107	-0.369107	-0.369107
EMR17001_20170705_S_21A	F	X	L	0.207892	0.627727	0.417809	0.837644	0.837644	0.277865	0.417809	0.837644	0.627727	0.627727	0.487782	0.557754	0.347837	0.347837	0.347837	0.417809	0.487782	-0.00202477	0.347837	0.277865	0.417809	0.277865	0.207892	0.207892	0.13792	0.13792	0.207892	0.277865	0.0679476	0.0679476	0.347837	0.697699	0.627727	0.487782	0.487782	0.627727	0.627727	0.557754	1.04756	0.907616
EMR17001_20170705_S_21B	F		L	-0.00972356	-0.0881146	-0.00972356	0.0686675	-0.00972356	-0.0881146	-0.0881146	-0.0881146	0.303841	0.0686675	0.147059	-0.166506	-0.166506	0.0686675	-0.00972356	-0.00972356	-0.00972356	-0.0881146	0.382232	0.22545	0.0686675	0.147059	-0.166506	0.147059	-0.0881146	-0.166506	-0.0881146	-0.166506	0.303841	-0.166506	-0.166506	0.0686675	0.0686675	0.147059	0.303841	0.147059	-0.0881146	-0.0881146	0.539014	0.617405
EMR17001_20170705_S_23A	F	X	R	0.14479	-0.0448189	-0.360834	0.0183841	0.0183841	-0.171225	-0.0448189	-0.108022	-0.234428	-0.171225	-0.0448189	-0.234428	-0.297631	-0.297631	0.0183841	-0.0448189	-0.108022	0.0183841	0.0815871	0.14479	0.14479	0.650414	0.77682	0.77682	0.966429	0.840023	0.334399	0.587211	0.14479	0.524008	0.271196	0.14479	0.460805	0.207993	-0.108022	-0.0448189	-0.171225	-0.108022	-0.171225	-0.108022
EMR17001_20170705_S_23B	F	X	L	-0.226863	-0.0303828	-0.325102	0.067857	-0.226863	-0.0303828	0.067857	0.067857	-0.226863	-0.128623	0.362577	0.264337	-0.128623	-0.226863	0.067857	-0.0303828	-0.226863	-0.128623	-0.226863	0.166097	-0.0303828	0.362577	0.166097	0.067857	0.166097	0.264337	-0.0303828	0.264337	0.657296	0.460816	0.264337	-0.128623	-0.128623	0.067857	-0.0303828	0.166097	-0.0303828	0.067857	-0.226863	-0.226863
EMR17001_20170705_S_23C	F	X	R	0.0576911	0.281672	0.337667	0.113686	0.169681	-0.0542991	-0.110294	-0.0542991	-0.0542991	0.113686	0.225677	-0.0542991	0.449657	0.505652	0.449657	0.561647	0.169681	0.0576911	0.0576911	0.337667	0.225677	0.169681	0.897618	1.40157	1.00961	1.17759	1.1216	1.00961	0.729633	1.0656	0.505652	0.617642	0.337667	-0.0542991	-0.222284	-0.0542991	0.113686	0.225677	-0.0542991	-0.0542991
EMR17001_20170705_S_25A	F			-0.102061	-0.102061	-0.102061	-0.102061	-0.102061	-0.102061	-0.102061	-0.102061	-0.102061	-0.102061	-0.102061	-0.102061	-0.102061	-0.102061	-0.102061	-0.102061	-0.102061	-0.102061	-0.102061	-0.102061	-0.102061	-0.102061	-0.102061	-0.102061	-0.102061	-0.102061	-0.102061	-0.102061	-0.102061	-0.102061	-0.102061	-0.102061	-0.102061	-0.102061	-0.102061	-0.102061	-0.102061	-0.102061	-0.102061	-0.102061
EMR17001_20170705_S_25B	F	X	R	0.136717	-0.0255383	-0.187794	-0.106666	-0.0255383	-0.187794	-0.0255383	-0.0255383	-0.187794	0.136717	0.0555896	-0.106666	0.136717	-0.106666	0.217845	0.0555896	0.380101	0.136717	0.298973	0.542357	0.704613	0.380101	0.704613	0.623485	0.623485	0.542357	0.866869	0.542357	0.542357	0.461229	0.704613	0.217845	0.461229	0.217845	0.461229	0.298973	0.136717	-0.0255383	0.0555896	-0.106666
EMR17001_20170705_S_25C	F	X	L	-0.182135	0.182801	-0.109147	0.0368267	0.0368267	-0.0361604	0.109814	0.255788	0.547736	0.328775	0.182801	0.182801	0.182801	-0.109147	-0.0361604	0.0368267	-0.109147	0.0368267	0.255788	0.255788	-0.401096	-0.255122	-0.255122	-0.474083	-0.328109	-0.255122	-0.255122	-0.328109	-0.328109	-0.0361604	-0.54707	-0.328109	-0.109147	-0.328109	0.255788	0.109814	0.182801	0.255788	0.547736	0.69371
EMR17001_20170705_S_25D	F	X	L	0.199172	0.199172	-0.151375	0.724993	0.374446	0.199172	-0.239011	0.637356	-0.0637378	0.286809	-0.239011	0.0238989	-0.0637378	0.111536	-0.151375	-0.151375	0.286809	0.0238989	0.111536	0.199172	0.286809	0.199172	0.286809	-0.0637378	-0.0637378	0.286809	0.0238989	-0.0637378	-0.239011	0.374446	0.374446	-0.0637378	0.286809	-0.239011	-0.414285	-0.151375	-0.0637378	-0.326648	0.374446	-0.151375
EMR17001_20170705_S_25E	F		L	0.015059	-0.102567	-0.102567	-0.33782	0.132685	0.015059	0.367938	0.015059	0.132685	-0.102567	0.015059	-0.102567	-0.102567	-0.102567	-0.102567	0.250311	-0.220193	0.015059	-0.220193	-0.102567	0.015059	-0.220193	0.250311	-0.102567	0.132685	-0.102567	-0.102567	-0.220193	-0.220193	-0.102567	-0.102567	-0.220193	0.485564	0.015059	-0.220193	-0.220193	-0.33782	-0.102567	0.485564	-0.102567
EMR17001_20170705_S_27A	F			-0.103357	-0.103357	-0.103357	-0.103357	-0.103357	-0.103357	-0.103357	-0.103357	-0.103357	-0.103357	-0.103357	-0.103357	-0.103357	-0.103357	-0.103357	-0.103357	-0.103357	-0.103357	-0.103357	-0.103357	-0.103357	-0.103357	-0.103357	-0.103357	-0.103357	-0.103357	-0.103357	-0.103357	-0.103357	-0.103357	-0.103357	-0.103357	-0.103357	-0.103357	-0.103357	-0.103357	-0.103357	-0.103357	-0.103357	-0.103357
EMR17001_20170705_S_27B	F		L	0.457284	-0.137065	0.16011	-0.137065	-0.137065	0.16011	-0.137065	0.16011	0.16011	-0.137065	-0.137065	-0.137065	-0.137065	0.16011	0.16011	-0.137065	-0.137065	-0.137065	-0.137065	-0.137065	0.16011	-0.137065	-0.137065	-0.137065	-0.137065	-0.137065	0.457284	-0.137065	-0.137065	-0.137065	0.16011	-0.137065	-0.137065	-0.137065	-0.137065	0.16011	-0.137065	-0.137065	-0.137065	-0.137065
EMR17001_20170705_S_27C	F	X	L	-0.0769815	1.14873	-0.0769815	0.273221	0.798525	0.448323	0.273221	0.0981198	0.448323	0.273221	-0.252083	-0.252083	0.0981198	0.273221	-0.0769815	0.0981198	0.273221	-0.0769815	0.798525	0.623424	0.0981198	0.0981198	0.273221	-0.0769815	0.798525	-0.0769815	0.0981198	0.273221	0.798525	0.0981198	-0.252083	0.623424	-0.0769815	-0.0769815	0.623424	0.0981198	0.798525	0.0981198	0.448323	0.273221
EMR17001_20170705_S_27D	F			0.299748	-0.0859141	-0.0859141	-0.0859141	-0.0859141	-0.0859141	-0.0859141	-0.0859141	-0.0859141	-0.0859141	-0.0859141	-0.0859141	-0.0859141	-0.0859141	-0.0859141	-0.0859141	-0.0859141	-0.0859141	-0.0859141	-0.0859141	-0.0859141	-0.0859141	-0.0859141	-0.0859141	-0.0859141	-0.0859141	-0.0859141	-0.0859141	-0.0859141	-0.0859141	-0.0859141	-0.0859141	-0.0859141	-0.0859141	-0.0859141	-0.0859141	-0.0859141	-0.0859141	-0.0859141	-0.0859141
EMR17001_20170705_S_29A	F	X	L	0.249206	0.152425	-0.0411382	0.152425	0.152425	0.152425	-0.234701	0.442769	0.345987	0.345987	0.0556432	0.0556432	0.345987	-0.234701	0.0556432	0.152425	-0.13792	-0.13792	-0.234701	0.345987	0.442769	0.249206	-0.13792	-0.234701	0.829894	0.636331	0.442769	0.926676	1.12024	0.733113	1.3138	0.733113	0.249206	0.345987	0.249206	0.152425	-0.13792	-0.0411382	-0.0411382	-0.0411382
EMR17001_20170705_S_31A	F	X	L	0.508041	0.508041	-0.231939	0.138051	0.323046	-0.046944	-0.231939	0.323046	-0.046944	-0.231939	-0.231939	-0.231939	-0.046944	0.138051	-0.046944	0.138051	0.138051	0.138051	-0.231939	-0.046944	0.323046	0.323046	0.138051	-0.046944	0.323046	0.693037	-0.046944	-0.046944	0.693037	0.323046	0.693037	-0.046944	0.323046	0.508041	0.693037	0.508041	-0.231939	-0.046944	-0.231939	-0.046944
EMR17002_20170824_S_01A	F	X	L	-0.141936	0.377692	0.158901	0.18625	-0.00519197	-0.114587	0.240948	0.213599	0.0768546	0.0495057	0.268297	0.268297	0.405041	0.295645	0.240948	0.0768546	0.569134	0.295645	0.322994	0.459739	0.0221569	0.18625	0.268297	-0.0325408	0.0221569	-0.141936	-0.0325408	-0.00519197	-0.141936	0.268297	0.0221569	-0.0872385	0.0768546	-0.114587	0.213599	-0.00519197	-0.00519197	0.240948	0.322994	-0.0325408
EMR17002_20170824_S_05A	F	X	R	0.212297	-0.0871858	-0.0241368	0.00738763	-0.0241368	-0.213284	-0.150235	-0.150235	-0.370906	-0.26057	-0.292095	-0.370906	-0.323619	-0.26057	-0.26057	-0.197521	-0.134473	-0.181759	-0.0871858	0.196534	0.180772	0.180772	0.480255	0.827024	0.827024	0.653639	0.432968	0.212297	0.196534	0.0546743	0.117723	-0.0714236	0.0231499	-0.165997	-0.11871	-0.197521	-0.244808	-0.102948	0.259583	0.369919
EMR17002_20170824_S_07A	F	X	L	0.158737	-0.207847	-0.103109	0.263475	-0.0507396	-0.0507396	0.263475	0.420582	0.630058	0.263475	0.420582	0.630058	0.630058	1.04901	0.577689	0.420582	0.420582	0.263475	0.0539985	0.211106	0.00162941	-0.103109	0.0539985	-0.155478	-0.260216	-0.207847	-0.260216	-0.207847	-0.0507396	-0.207847	-0.103109	-0.207847	-0.103109	-0.155478	-0.155478	-0.155478	0.00162941	-0.207847	-0.103109	-0.0507396
EMR17002_20170824_S_09A	F	X	L	-0.0524399	-0.0329057	-0.0524399	-0.28685	-0.325918	-0.325918	-0.306384	-0.423589	-0.423589	-0.540794	-0.404055	-0.462658	-0.52126	-0.482192	-0.482192	-0.462658	-0.384521	-0.443123	-0.52126	-0.384521	-0.462658	-0.443123	-0.482192	-0.52126	-0.482192	-0.501726	-0.540794	-0.540794	-0.540794	-0.560328	-0.52126	-0.540794	-0.540794	-0.501726	-0.540794	-0.482192	-0.462658	-0.560328	-0.482192	-0.52126
EMR17002_20170824_S_09B	F	X	R	-0.0435627	-0.303675	-0.117881	-0.117881	-0.229357	-0.340834	-0.192198	-0.192198	-0.0435627	-0.117881	-0.0807216	0.067914	0.105073	0.253709	0.365185	0.290867	0.365185	0.179391	0.55098	0.476662	0.179391	0.21655	0.290867	0.0307551	-0.117881	-0.0435627	-0.117881	0.105073	-0.117881	0.0307551	-0.117881	-0.0807216	-0.117881	-0.155039	-0.155039	-0.377993	-0.0435627	-0.266516	-0.266516	-0.155039
EMR17002_20170824_S_11A	F	X	L	-0.0336876	-0.150364	-0.0336876	-0.150364	-0.208702	-0.150364	-0.208702	-0.0336876	-0.0920256	-0.26704	-0.26704	-0.150364	-0.26704	-0.150364	-0.208702	-0.26704	-0.208702	-0.150364	-0.26704	-0.26704	-0.150364	-0.26704	-0.26704	-0.150364	-0.150364	-0.208702	-0.208702	-0.0920256	-0.150364	-0.26704	-0.208702	-0.208702	-0.26704	-0.150364	-0.208702	-0.26704	-0.150364	-0.208702	-0.208702	-0.0920256
EMR17002_20170824_S_11B	F		L	-0.00390604	0.0669941	-0.145706	-0.00390604	-0.00390604	-0.00390604	-0.145706	-0.145706	0.137894	-0.00390604	-0.0748062	-0.0748062	-0.00390604	-0.0748062	0.0669941	0.137894	0.137894	-0.216606	0.0669941	0.0669941	-0.00390604	0.0669941	-0.0748062	-0.0748062	-0.0748062	0.137894	-0.00390604	-0.0748062	-0.0748062	-0.00390604	-0.216606	-0.145706	-0.0748062	0.0669941	-0.0748062	0.0669941	0.0669941	-0.00390604	0.279695	-0.00390604
EMR17002_20170824_S_23A	F		L	-0.0596948	-0.114247	0.0494091	0.158513	-0.114247	-0.114247	0.158513	-0.0596948	-0.114247	-0.00514287	-0.0596948	-0.114247	-0.223351	0.0494091	-0.0596948	-0.114247	-0.0596948	-0.00514287	-0.0596948	-0.114247	-0.114247	-0.00514287	-0.114247	-0.223351	-0.168799	-0.114247	-0.168799	-0.114247	-0.0596948	-0.114247	-0.168799	0.103961	-0.00514287	0.103961	-0.168799	-0.0596948	0.322169	-0.00514287	-0.114247	-0.168799
EMR17002_20170824_S_23B	F	X	L	-0.238288	-0.161241	-0.238288	0.0699004	-0.0456702	-0.161241	0.0313769	0.262518	-0.00714667	0.108424	0.0699004	0.108424	0.0313769	0.0699004	0.185471	-0.0456702	-0.122717	-0.199764	-0.122717	-0.122717	-0.122717	-0.199764	0.0699004	-0.0841937	-0.161241	-0.315335	-0.315335	-0.315335	-0.315335	-0.315335	-0.315335	-0.315335	-0.315335	-0.315335	-0.315335	-0.276811	-0.276811	-0.276811	-0.276811	-0.238288
EMR17002_20170824_S_27A	F		R	-0.326495	-0.326495	-0.326495	-0.326495	-0.326495	-0.326495	-0.326495	-0.326495	-0.284695	-0.326495	-0.326495	-0.326495	-0.326495	-0.326495	-0.326495	-0.326495	-0.326495	-0.326495	-0.326495	-0.326495	-0.326495	-0.326495	-0.284695	-0.284695	-0.284695	-0.284695	-0.284695	-0.242896	-0.242896	-0.159296	-0.201096	0.00790213	-0.117497	-0.159296	-0.242896	-0.201096	-0.326495	-0.201096	-0.242896	-0.201096
EMR17002_20170824_S_31A	F	X	L	-0.247231	-0.209078	-0.247231	-0.209078	-0.132771	-0.132771	0.0961492	-0.0564642	-0.209078	-0.132771	0.134303	0.0579959	-0.247231	0.0579959	0.134303	0.0579959	0.0961492	-0.0564642	0.0961492	-0.0564642	0.0198425	-0.170924	-0.285384	-0.0183108	-0.0183108	-0.132771	-0.247231	-0.209078	-0.0183108	0.363223	0.0961492	1.08814	0.935523	0.668449	0.782909	0.515836	0.630296	0.515836	0.439529	0.172456
EMR17003_20170612_S_05A	F		R	-0.0556286	-0.173231	-0.173231	-0.173231	-0.173231	0.061974	-0.173231	-0.0556286	-0.0556286	0.061974	0.061974	-0.173231	-0.173231	-0.0556286	-0.173231	-0.173231	-0.173231	-0.0556286	-0.0556286	-0.173231	0.179577	0.061974	-0.0556286	-0.0556286	-0.0556286	-0.0556286	-0.0556286	0.179577	-0.0556286	-0.173231	0.061974	-0.173231	-0.173231	-0.173231	-0.173231	-0.173231	-0.173231	-0.173231	-0.0556286	-0.173231
EMR17003_20170612_S_09A	F	X	L	-0.0670041	0.0307476	-0.262507	-0.164756	-0.11588	-0.164756	-0.11588	-0.11588	-0.311383	-0.213632	-0.262507	-0.409135	-0.213632	-0.164756	-0.213632	-0.164756	-0.311383	-0.213632	-0.0181282	-0.458011	-0.409135	-0.311383	-0.311383	-0.409135	-0.409135	-0.506887	-0.262507	-0.262507	-0.311383	-0.262507	-0.360259	-0.506887	-0.0670041	-0.164756	-0.164756	-0.360259	0.0796235	0.177375	0.568382	0.324003
EMR17003_20170612_S_09B	F	X	R	-0.317976	-0.0894536	-0.0894536	-0.203715	-0.0894536	-0.203715	-0.260845	-0.375106	0.0248075	-0.0894536	-0.146584	-0.260845	0.081938	-0.203715	0.0248075	-0.203715	-0.260845	-0.317976	-0.317976	-0.375106	-0.260845	-0.317976	-0.317976	-0.317976	-0.260845	-0.317976	-0.317976	-0.375106	-0.375106	-0.432237	-0.260845	-0.432237	-0.317976	-0.375106	-0.375106	-0.375106	-0.203715	-0.375106	-0.260845	-0.260845
EMR17003_20170612_S_11A	F		L	-0.129899	-0.06177	0.00635897	0.210746	-0.06177	0.0744879	0.00635897	-0.129899	0.0744879	0.0744879	-0.06177	0.0744879	-0.06177	-0.06177	0.347004	-0.06177	0.142617	0.0744879	0.278875	0.142617	0.00635897	0.00635897	-0.06177	0.142617	-0.266157	-0.198028	-0.334286	-0.198028	-0.334286	-0.129899	-0.198028	-0.198028	-0.334286	-0.334286	-0.334286	-0.334286	-0.266157	-0.266157	-0.198028	-0.129899
EMR17003_20170612_S_13A	F	X	L	-0.264368	-0.0310352	0.0467424	-0.0310352	0.12452	-0.0310352	-0.18659	-0.108813	0.202297	-0.18659	-0.108813	-0.264368	-0.0310352	0.202297	-0.18659	-0.18659	0.280075	-0.18659	-0.18659	-0.0310352	-0.0310352	-0.0310352	0.0467424	-0.264368	-0.18659	-0.0310352	0.0467424	0.12452	0.43563	-0.264368	-0.0310352	0.43563	0.280075	0.591185	0.280075	0.824518	1.05785	0.74674	0.668963	0.74674
EMR17003_20170612_S_17A	F	X	L	0.077832	-0.037644	0.251046	0.193308	-0.210858	0.13557	-0.0953821	0.308784	-0.037644	0.077832	0.13557	0.13557	0.481998	0.366522	0.308784	0.308784	0.597474	0.13557	0.077832	0.020094	0.020094	0.308784	-0.15312	0.193308	0.597474	0.077832	0.366522	0.308784	0.077832	-0.15312	0.42426	-0.210858	-0.037644	-0.0953821	-0.384072	0.077832	-0.037644	-0.037644	-0.15312	-0.268596
EMR17003_20170612_S_17B	F	X	L	0.767347	0.425935	0.596641	0.312131	0.482837	0.198327	0.539739	0.482837	0.596641	0.824248	0.710445	0.767347	0.824248	0.653543	0.824248	0.369033	0.88115	0.88115	1.05186	0.938052	0.767347	0.482837	0.425935	0.596641	0.141425	0.0276213	0.141425	0.539739	0.255229	0.255229	0.425935	0.88115	0.767347	0.994954	0.994954	1.05186	0.255229	0.198327	0.141425	-0.0861826
EMR17003_20170612_S_17C	F	X	R	-0.06138	-0.192539	0.00419924	0.00419924	-0.192539	-0.258118	-0.06138	-0.126959	0.00419924	-0.06138	-0.126959	0.0697785	-0.06138	-0.126959	0.135358	0.135358	0.0697785	-0.126959	-0.192539	0.397675	0.135358	0.200937	0.200937	0.463254	0.922309	1.05347	0.922309	0.85673	0.659992	0.332096	0.463254	0.725571	0.659992	1.05347	0.987888	0.725571	0.528833	0.332096	0.463254	0.135358
EMR17003_20170612_S_19A	F	X	L	0.0545181	-0.119775	0.315957	0.0545181	-0.206921	-0.119775	-0.119775	-0.0326284	-0.0326284	0.403104	0.141665	0.141665	-0.119775	0.315957	-0.0326284	0.0545181	-0.0326284	0.664543	0.315957	0.141665	0.228811	0.228811	0.0545181	-0.0326284	-0.119775	-0.119775	0.141665	-0.0326284	-0.0326284	0.0545181	-0.0326284	-0.206921	0.0545181	-0.119775	0.49025	-0.0326284	0.0545181	-0.0326284	0.315957	-0.119775
EMR17003_20170612_S_21A	F	X	L	0.165754	-0.00937461	0.165754	0.0781898	-0.096939	0.165754	-0.00937461	-0.00937461	-0.096939	0.165754	-0.184503	-0.00937461	0.0781898	0.253319	0.0781898	-0.00937461	-0.096939	-0.00937461	0.0781898	0.340883	-0.096939	0.0781898	0.340883	0.0781898	0.165754	0.165754	0.0781898	-0.184503	-0.184503	-0.096939	-0.272068	-0.272068	-0.272068	-0.00937461	-0.184503	-0.184503	-0.184503	-0.00937461	-0.184503	-0.184503
EMR17003_20170612_S_21B	F	X	L	0.030704	-0.151681	-0.0300911	-0.0300911	-0.334067	-0.273272	-0.273272	-0.334067	-0.151681	0.030704	-0.0908862	-0.0300911	0.0914991	-0.212476	-0.0908862	-0.0908862	-0.212476	-0.212476	-0.151681	-0.0908862	-0.273272	-0.273272	-0.0908862	-0.151681	-0.334067	-0.273272	-0.273272	-0.334067	-0.334067	-0.334067	-0.334067	-0.212476	-0.273272	-0.212476	-0.212476	-0.212476	-0.0300911	-0.273272	-0.334067	-0.212476
EMR17003_20170612_S_23A	F	X		-0.239929	-0.13695	0.0690088	-0.0339706	-0.13695	-0.13695	-0.13695	-0.13695	-0.0339706	0.0690088	-0.239929	-0.13695	-0.13695	-0.0339706	-0.13695	-0.0339706	-0.13695	-0.13695	0.171988	-0.239929	-0.239929	-0.239929	-0.13695	-0.13695	-0.13695	-0.239929	-0.239929	-0.239929	-0.239929	-0.239929	-0.239929	-0.239929	-0.13695	-0.239929	-0.13695	-0.239929	-0.13695	-0.13695	-0.13695	-0.13695
EMR17003_20170612_S_23B	F	X	L	-0.0764409	-0.168316	-0.168316	-0.168316	-0.168316	-0.168316	-0.168316	-0.260191	-0.0764409	-0.168316	-0.260191	-0.260191	-0.260191	-0.0764409	-0.260191	-0.260191	-0.168316	-0.260191	-0.260191	-0.260191	-0.260191	-0.260191	-0.168316	-0.168316	-0.260191	-0.260191	-0.260191	-0.260191	-0.260191	-0.0764409	-0.260191	-0.260191	-0.168316	-0.260191	-0.260191	-0.168316	-0.168316	0.015434	-0.168316	-0.168316
EMR17003_20170612_S_25A	F	X	L	-0.0276275	-0.0276275	0.0253415	-0.0276275	-0.186535	-0.0805966	-0.0276275	-0.186535	0.13128	0.0783106	-0.0276275	-0.239504	0.0253415	-0.0805966	-0.0276275	-0.186535	-0.239504	-0.239504	-0.292473	-0.133566	-0.292473	-0.345442	-0.45138	-0.345442	-0.45138	-0.45138	-0.398411	-0.398411	-0.45138	-0.45138	-0.45138	-0.45138	-0.45138	-0.45138	-0.45138	-0.45138	-0.345442	-0.398411	-0.398411	-0.45138
EMR17003_20170612_S_25B	F		L	-0.19885	-0.19885	-0.19885	-0.084533	-0.19885	-0.19885	0.029784	-0.19885	-0.084533	-0.19885	-0.19885	-0.084533	-0.084533	-0.084533	-0.084533	-0.19885	0.144101	-0.084533	0.029784	-0.084533	-0.19885	0.144101	0.029784	-0.19885	-0.19885	-0.19885	-0.19885	-0.084533	-0.19885	-0.19885	-0.084533	-0.084533	-0.19885	0.029784	-0.084533	-0.084533	0.144101	0.029784	0.029784	0.029784
EMR17003_20170612_S_27A	F		L	0.0877048	0.224294	-0.0488847	-0.0488847	0.0877048	-0.0488847	-0.0488847	-0.185474	0.0877048	0.0877048	-0.185474	-0.0488847	0.224294	-0.185474	0.224294	-0.0488847	-0.0488847	-0.185474	-0.0488847	0.0877048	-0.185474	-0.185474	-0.0488847	0.0877048	-0.185474	-0.185474	-0.185474	-0.185474	-0.185474	-0.185474	-0.185474	-0.185474	-0.185474	-0.185474	-0.185474	-0.0488847	0.0877048	0.0877048	-0.0488847	-0.185474
EMR17003_20170612_S_29A	F	X	L	0.0129507	-0.0606514	0.160155	0.0497517	0.0129507	0.0865527	-0.0606514	0.123354	-0.171054	-0.207855	-0.0606514	-0.0238504	-0.0974524	0.0497517	-0.0238504	0.0497517	0.0865527	0.123354	0.307359	0.270558	0.638568	0.601767	0.969777	1.15378	1.7426	1.669	1.55859	1.853	2.29461	1.48499	1.30099	1.48499	2.07381	1.52179	2.58902	2.88343	2.92023	3.39865	3.61945	3.47225
EMR17004_20170807_S_03A	F		L	0.199124	0.0708172	0.156355	-0.0147208	0.241893	0.284662	-0.0574898	0.0708172	-0.143028	-0.185797	-0.271335	-0.228566	-0.271335	-0.314104	-0.356873	-0.314104	-0.271335	-0.399642	-0.314104	-0.228566	-0.356873	-0.314104	-0.228566	-0.185797	0.113586	-0.100259	0.241893	0.412969	0.584045	0.156355	-0.0574898	-0.185797	-0.143028	0.156355	0.284662	0.712352	0.455738	0.455738	0.79789	1.01174
EMR17004_20170807_S_03B	F	X	L	0.432647	0.142134	0.548852	0.548852	0.200237	0.374544	0.316442	0.200237	0.0840319	0.0259295	0.374544	-0.0902755	0.142134	0.0259295	0.258339	-0.148378	0.258339	-0.032173	-0.0902755	0.0259295	0.142134	0.200237	0.0259295	0.258339	0.606954	0.665057	0.490749	0.548852	0.258339	0.258339	0.0840319	0.0259295	0.316442	0.200237	0.258339	0.258339	0.200237	0.258339	-0.0902755	-0.032173
EMR17004_20170807_S_07A	F	X	L	-0.158274	-0.158274	-0.158274	-0.0372033	-0.0372033	-0.158274	0.0838671	-0.158274	0.204937	-0.0372033	-0.0372033	-0.0372033	0.0838671	-0.0372033	-0.158274	-0.0372033	-0.0372033	-0.0372033	-0.0372033	0.0838671	0.0838671	0.0838671	0.0838671	0.0838671	-0.158274	-0.0372033	0.326008	-0.0372033	-0.0372033	0.0838671	-0.0372033	0.326008	0.0838671	-0.0372033	-0.0372033	-0.0372033	0.0838671	0.204937	-0.158274	0.0838671
EMR17004_20170807_S_09A	F	X	R	0.11939	0.11939	-0.0907734	0.224472	-0.195855	-0.0382325	-0.195855	-0.0382325	-0.143314	-0.195855	-0.248396	-0.0382325	-0.143314	-0.143314	-0.300937	-0.0907734	-0.0907734	0.0668493	0.0143084	-0.143314	0.0668493	0.0668493	0.224472	0.539717	0.0668493	0.11939	0.277013	0.11939	-0.195855	-0.0382325	-0.195855	-0.300937	-0.0382325	-0.248396	-0.143314	-0.195855	-0.0907734	-0.195855	-0.0907734	-0.195855
EMR17004_20170807_S_11A	F	X	L	-0.220566	-0.135609	-0.135609	-0.390478	-0.135609	-0.178087	-0.305522	-0.050653	-0.0931311	-0.178087	-0.0931311	-0.220566	-0.00817485	-0.00817485	0.0767814	-0.220566	-0.050653	0.0767814	0.0767814	0.204216	0.161738	0.11926	0.0343033	-0.305522	-0.135609	-0.305522	-0.263044	-0.263044	-0.305522	-0.390478	-0.348	-0.305522	-0.305522	-0.220566	-0.305522	-0.220566	-0.305522	-0.348	-0.348	-0.0931311
EMR17004_20170807_S_17A	F	X	L	-0.110485	0.136269	-0.0556509	-0.0556509	0.163686	0.245937	-0.274988	-0.0282338	-0.137902	-0.247571	0.108852	0.191103	0.163686	-0.165319	0.21852	-0.0830681	-0.110485	-0.165319	-0.165319	-0.0556509	-0.192737	-0.274988	0.191103	0.163686	-0.0556509	0.492691	0.41044	0.163686	0.0266004	-0.137902	0.0540175	-0.192737	-0.0556509	-0.0556509	-0.0556509	-0.192737	-0.137902	-0.137902	-0.137902	-0.192737
EMR17006_20170615_S_01A	M	X	R	0.11522	0.271627	-0.197595	-0.275799	0.0370161	0.193424	0.193424	0.271627	-0.119391	0.0370161	0.506238	0.271627	0.428035	0.662646	0.740849	0.506238	0.428035	0.11522	0.349831	0.349831	0.584442	0.271627	0.662646	0.193424	0.11522	0.428035	-0.0411876	-0.0411876	0.11522	0.193424	-0.119391	0.0370161	0.897257	0.662646	1.21007	0.506238	0.819053	0.819053	0.11522	-0.0411876
EMR17006_20170615_S_03A	M			0.184942	-0.00213292	-0.00213292	0.0602255	-0.189208	-0.12685	-0.0644913	-0.189208	-0.251567	-0.00213292	-0.251567	-0.0644913	-0.189208	-0.0644913	-0.189208	-0.0644913	-0.12685	0.0602255	-0.00213292	-0.376283	0.122584	-0.251567	-0.313925	0.0602255	-0.0644913	-0.376283	-0.00213292	-0.189208	-0.189208	-0.313925	-0.0644913	-0.251567	-0.189208	0.0602255	-0.00213292	-0.189208	-0.12685	-0.0644913	-0.189208	-0.251567
EMR17006_20170615_S_05A	M	X	L	-0.286029	-0.323277	-0.174283	-0.360526	-0.360526	-0.24878	-0.286029	-0.323277	-0.360526	-0.323277	-0.360526	-0.360526	-0.323277	-0.472272	-0.546769	-0.50952	-0.50952	-0.50952	-0.546769	-0.50952	-0.50952	-0.546769	-0.546769	-0.546769	-0.546769	-0.546769	-0.50952	-0.546769	-0.546769	-0.546769	-0.50952	-0.546769	-0.472272	-0.435023	-0.472272	-0.323277	-0.397775	-0.397775	-0.397775	-0.360526
EMR17006_20170615_S_07A	M		L	-0.211686	0.152921	0.152921	0.152921	-0.0901502	-0.211686	-0.211686	-0.211686	-0.0901502	-0.211686	-0.211686	-0.211686	-0.211686	0.0313854	-0.211686	-0.0901502	-0.0901502	-0.211686	-0.211686	-0.0901502	-0.211686	-0.211686	-0.211686	-0.0901502	-0.211686	-0.211686	-0.211686	-0.0901502	-0.0901502	-0.211686	-0.211686	-0.0901502	-0.211686	-0.0901502	0.0313854	0.0313854	0.0313854	-0.0901502	-0.0901502	0.0313854
EMR17006_20170615_S_09A	M	X	R	1.37878	1.14273	0.670646	1.20174	1.08372	0.9657	0.847678	1.08372	0.788667	0.9657	0.670646	1.02471	0.552624	0.670646	0.552624	0.670646	0.493613	0.375592	0.729656	0.493613	0.611635	0.847678	0.198559	1.43779	1.55581	1.61482	2.26394	2.0869	2.32295	2.79503	3.1491	3.6802	3.73921	3.20811	2.32295	2.02789	1.26075	1.31976	0.729656	0.847678
EMR17006_20170615_S_09B	M		R	-0.0101956	-0.0101956	-0.149553	-0.0101956	-0.0101956	-0.0798741	-0.0101956	-0.0798741	0.0594828	0.268518	0.0594828	0.0594828	0.268518	-0.0798741	-0.0798741	-0.288909	0.0594828	-0.149553	-0.288909	-0.288909	-0.149553	-0.219231	-0.358588	-0.288909	-0.149553	-0.149553	0.0594828	-0.219231	-0.0101956	-0.149553	0.0594828	0.895624	1.9408	1.80144	1.52273	1.17434	1.17434	0.407875	0.825946	0.477553
EMR17006_20170615_S_11A	M		L	0.130565	0.0696896	-0.112936	-0.112936	-0.112936	0.252315	0.252315	0.00881451	-0.112936	-0.0520605	0.00881451	-0.0520605	0.00881451	0.31319	-0.173811	-0.173811	-0.0520605	0.00881451	-0.173811	-0.173811	0.00881451	-0.173811	-0.112936	-0.173811	-0.295561	-0.295561	-0.295561	-0.295561	-0.173811	-0.234686	-0.234686	-0.173811	-0.295561	0.00881451	-0.234686	-0.295561	-0.295561	-0.112936	-0.295561	-0.234686
EMR17006_20170615_S_11B	M	X	R	0.336957	-0.15665	0.238236	0.0901538	-0.0579282	-0.107289	-0.0579282	-0.20601	0.238236	-0.20601	0.336957	0.188875	0.485039	0.336957	0.139514	0.830564	0.287596	0.435678	0.978646	0.830564	1.27481	0.929285	1.76842	1.32417	1.17609	0.435678	0.0901538	-0.403453	-0.403453	-0.452814	-0.354092	-0.354092	-0.502174	-0.452814	-0.452814	-0.304732	-0.354092	-0.20601	-0.403453	-0.354092
EMR17006_20170615_S_11C	M		R	-0.202609	-0.122988	-0.202609	-0.122988	0.0362539	-0.202609	-0.122988	-0.202609	-0.122988	-0.122988	-0.202609	-0.122988	0.0362539	0.354738	0.275117	0.513979	0.275117	0.513979	0.115875	-0.043367	0.0362539	0.115875	0.0362539	-0.122988	-0.202609	-0.202609	-0.122988	-0.202609	-0.202609	-0.202609	-0.202609	-0.122988	0.195496	0.0362539	0.0362539	0.0362539	-0.122988	-0.202609	-0.202609	-0.202609
EMR17006_20170615_S_11D	M			-0.111663	-0.111663	-0.111663	-0.111663	-0.111663	-0.111663	-0.111663	-0.111663	-0.111663	-0.111663	-0.111663	-0.111663	-0.111663	-0.111663	-0.111663	-0.111663	-0.111663	-0.111663	-0.111663	-0.111663	-0.111663	-0.111663	-0.111663	-0.111663	-0.111663	-0.111663	-0.111663	-0.111663	-0.111663	-0.111663	-0.111663	-0.111663	-0.111663	-0.111663	-0.111663	-0.111663	-0.111663	-0.111663	-0.111663	-0.111663
EMR17006_20170615_S_13A	M	X	L	0.313031	0.0801969	0.119003	0.313031	-0.113832	0.0413913	0.313031	0.157808	0.00258556	0.895116	0.545865	0.50706	0.739894	0.856311	0.701088	0.545865	0.390642	0.429448	0.274225	-0.230249	-0.113832	-0.230249	-0.152637	-0.0750258	0.119003	0.50706	0.119003	-0.152637	-0.191443	-0.30786	-0.463083	-0.113832	0.157808	0.584671	0.662282	0.390642	0.50706	0.739894	0.50706	0.584671
EMR17006_20170615_S_15A	M	X	L	-0.104795	0.239612	-0.0617441	0.088934	0.0243576	0.0243576	0.368765	0.562494	0.39029	0.304188	-0.12632	0.175036	0.0028322	0.0458831	-0.0402187	-0.212422	-0.0617441	-0.169371	-0.0832696	-0.169371	-0.233948	-0.255473	-0.212422	-0.190897	-0.233948	-0.276999	-0.578355	-0.341575	-0.32005	-0.0402187	0.304188	1.10063	0.691647	0.175036	0.110459	-0.190897	-0.255473	-0.0402187	-0.341575	-0.406151
EMR17006_20170615_S_15B	M	X	R	0.532033	0.225522	0.157409	0.600146	0.804486	0.463919	0.0892953	0.191465	-0.0128748	0.259579	0.191465	0.225522	0.0892953	0.463919	0.702316	0.66826	0.532033	0.634203	0.77043	0.906657	0.804486	0.634203	0.225522	-0.0809883	-0.115045	-0.115045	0.123352	0.634203	0.0211819	0.600146	0.395806	0.0892953	-0.0469316	-0.149102	-0.115045	-0.319385	-0.319385	-0.0809883	0.225522	0.293636
EMR17006_20170615_S_17A	M	X	R	0.459742	0.340095	-0.121398	-0.087213	-0.087213	-0.087213	0.186264	0.186264	0.340095	0.323003	0.81868	0.784496	0.476834	0.425557	0.425557	0.203357	-0.42906	-0.121398	-0.292321	-0.292321	0.0153409	-0.121398	-0.0359361	0.0666179	0.220449	0.647757	1.29727	0.647757	-0.343598	-0.343598	0.0666179	0.100803	0.0324333	0.0666179	0.869957	0.750311	0.357188	0.271726	0.0495256	-0.0188437
EMR17006_20170615_S_17B	M	X	L	0.585482	0.0212997	0.350406	0.162345	0.585482	-0.0257154	0.162345	0.0683149	0.162345	0.20936	0.11533	0.11533	0.11533	-0.166761	-0.260791	-0.260791	-0.166761	-0.354822	-0.260791	-0.401837	-0.401837	-0.401837	-0.401837	-0.354822	-0.354822	-0.307807	-0.307807	-0.401837	-0.495867	-0.495867	-0.448852	-0.495867	-0.354822	-0.119746	0.256376	0.162345	-0.119746	-0.213776	-0.260791	-0.166761
EMR17006_20170615_S_23A	M	X	R	-0.233157	-0.094818	-0.0118145	0.18186	-0.0118145	0.154192	0.18186	0.18186	0.403203	0.237196	0.486206	0.403203	0.126525	0.209528	-0.0394824	0.292531	0.209528	0.403203	0.209528	0.264864	0.513874	0.375535	0.126525	-0.0671502	-0.177821	-0.288493	-0.4545	-0.260825	-0.343828	-0.509835	-0.399164	-0.426832	-0.122486	-0.343828	-0.31616	-0.399164	-0.731178	-0.509835	-0.31616	-0.094818
EMR17006_20170615_S_25A	M	X	R	-0.124828	-0.0635731	-0.00231836	-0.00231836	-0.00231836	-0.124828	0.242701	0.487719	0.0589364	0.303955	0.548974	0.610229	1.4678	1.22278	1.28403	1.65156	2.26411	1.77407	1.77407	1.52905	1.22278	1.28403	0.548974	0.0589364	-0.308592	-0.124828	-0.369847	-0.247337	-0.186083	-0.308592	-0.308592	-0.124828	-0.369847	-0.369847	-0.369847	-0.308592	-0.369847	-0.247337	-0.308592	-0.186083
EMR17006_20170615_S_27A	M	X	R	0.399159	0.399159	0.0124301	0.14134	0.109112	0.14134	0.109112	0.173567	0.0768849	0.173567	-0.116479	-0.0520247	-0.309844	-0.148707	-0.0520247	-0.245389	-0.0842521	0.0124301	-0.116479	-0.116479	0.399159	-0.213162	0.0446575	-0.309844	-0.277616	-0.0842521	-0.309844	-0.116479	-0.180934	-0.470981	-0.59989	-0.503208	-0.406526	-0.567663	-0.632118	-0.470981	-0.632118	-0.342071	-0.374299	-0.309844
EMR17006_20170615_S_27B	M	X	R	-0.151036	0.0136613	-0.118097	0.145419	0.0795403	-0.151036	0.11248	-0.0522176	0.211298	-0.151036	-0.249854	-0.249854	-0.381612	-0.447491	-0.51337	-0.414552	-0.51337	-0.348673	-0.414552	-0.414552	-0.348673	-0.315733	-0.282794	-0.447491	-0.414552	-0.612189	-0.54631	-0.480431	-0.51337	-0.51337	-0.54631	-0.579249	-0.579249	-0.480431	-0.645128	-0.645128	-0.612189	-0.612189	-0.645128	-0.645128
EMR17006_20170615_S_31A	M	X	L	0.18301	0.237773	-0.0908079	-0.0908079	-0.255098	0.18301	-0.0360443	0.0187192	-0.145571	0.237773	0.128246	-0.255098	0.0187192	0.18301	0.292537	0.402064	0.3473	0.128246	0.402064	0.292537	0.292537	0.292537	0.0734827	-0.0360443	0.0734827	0.0734827	0.0187192	0.18301	0.18301	-0.0360443	0.0187192	0.0734827	0.237773	0.128246	0.292537	0.0187192	-0.309862	0.0187192	-0.0908079	-0.145571
EMR17007_20170614_S_01A	M		R	0.0233543	-0.102317	-0.0125518	0.0054012	-0.102317	-0.156176	-0.0843641	-0.0484579	-0.066411	-0.138223	-0.12027	-0.0843641	-0.12027	-0.192082	-0.0125518	0.0413073	0.0413073	-0.066411	-0.0843641	0.0951665	-0.0125518	0.202885	0.0413073	-0.0305049	0.0233543	-0.0125518	-0.0843641	0.274697	0.0772134	-0.0125518	-0.0305049	-0.299801	-0.245942	0.0951665	0.202885	0.149026	-0.0484579	0.0592604	0.0413073	0.0413073
EMR17007_20170614_S_01B	M		L	-0.123317	-0.123317	0.249744	0.100519	0.100519	-0.0487049	-0.123317	-0.123317	-0.0487049	-0.0487049	-0.0487049	0.0259073	0.0259073	-0.123317	-0.123317	-0.123317	0.100519	0.100519	-0.123317	0.0259073	-0.0487049	-0.0487049	-0.0487049	0.0259073	-0.123317	-0.123317	-0.123317	-0.0487049	-0.123317	0.249744	0.0259073	-0.0487049	-0.123317	-0.0487049	-0.123317	-0.0487049	0.0259073	0.0259073	-0.123317	0.249744
EMR17007_20170614_S_03A	M	X	L	0.28008	0.170779	0.0250448	0.298297	-0.0113888	-0.0842559	-0.0842559	-0.102473	0.0250448	0.0250448	-0.0478224	-0.120689	-0.266424	-0.0296056	-0.120689	-0.138906	-0.266424	-0.211773	-0.0113888	-0.266424	-0.284641	-0.0842559	-0.0296056	-0.412158	-0.248207	-0.393941	-0.357508	-0.321074	-0.302857	-0.193557	-0.17534	-0.0296056	0.0796951	0.170779	0.152562	0.207213	0.170779	0.0796951	-0.266424	-0.284641
EMR17007_20170614_S_03B	M	X	L	-0.194296	-0.0738455	-0.0738455	-0.0979356	-0.242477	-0.0497553	-0.122026	0.0225151	-0.0738455	-0.0497553	0.142966	0.191146	0.142966	0.287507	0.287507	-0.0256652	0.118876	0.191146	0.0947856	-0.0738455	-0.170206	0.142966	-0.266567	-0.170206	-0.0979356	-0.146116	-0.218386	-0.0738455	-0.194296	-0.362927	-0.242477	-0.290657	-0.387018	-0.170206	0.0706955	0.0225151	0.142966	0.167056	0.167056	0.167056
EMR17007_20170614_S_05A	M		R	-0.011647	-0.0779703	-0.144294	0.0546763	-0.210617	-0.011647	-0.011647	-0.210617	-0.144294	-0.144294	-0.011647	-0.210617	0.121	-0.144294	-0.210617	-0.210617	-0.144294	0.0546763	-0.210617	-0.011647	-0.011647	0.121	0.0546763	-0.144294	0.121	-0.144294	-0.210617	-0.144294	0.0546763	-0.011647	-0.0779703	-0.0779703	-0.210617	-0.144294	0.0546763	-0.011647	0.0546763	0.253646	0.187323	-0.011647
EMR17007_20170614_S_07A	M	X	R	0.420543	0.349503	0.193215	0.235839	0.633663	0.519999	0.875199	1.00307	1.17357	0.946239	0.932031	1.17357	1.32985	0.903615	0.548415	0.491583	0.363711	0.193215	0.306879	-0.0625286	0.0369273	-0.0341127	-0.190401	0.0227193	-0.00569666	0.392127	0.392127	0.448959	0.0937593	-0.176193	-0.190401	-0.190401	0.321087	0.704703	1.31565	0.889407	1.32985	1.35827	1.50035	1.13094
EMR17007_20170614_S_09A	M	X	R	-0.191452	-0.096454	0.220206	0.125208	-0.0331219	0.0618762	-0.00145586	-0.12812	-0.223118	-0.254784	-0.096454	-0.0331219	-0.096454	0.0302102	0.0935423	-0.159786	-0.0331219	-0.0331219	-0.0331219	-0.159786	-0.159786	-0.12812	-0.0647879	-0.159786	-0.00145586	-0.0331219	0.0302102	0.220206	0.220206	0.220206	0.346871	0.0302102	0.0618762	0.283539	0.125208	-0.0331219	-0.12812	-0.096454	0.125208	0.0302102
EMR17007_20170614_S_09B	M		R	0.0938904	0.127662	0.0938904	0.127662	0.127662	0.0938904	-0.0411964	-0.159397	-0.176283	-0.142512	-0.193169	-0.226941	-0.159397	-0.142512	-0.0580823	-0.243827	-0.243827	-0.10874	-0.0749682	-0.091854	-0.125626	0.161434	-0.0411964	-0.0243106	0.026347	-0.125626	-0.125626	-0.159397	-0.10874	-0.193169	-0.176283	-0.176283	-0.193169	-0.193169	-0.243827	-0.260713	-0.226941	-0.091854	-0.091854	-0.091854
EMR17007_20170614_S_11A	M	X	R	0.106895	-0.276395	-0.0110404	-0.128976	-0.0110404	-0.0110404	0.0479274	0.0184435	0.136379	-0.0700081	0.37225	0.283798	0.136379	0.342766	0.195347	0.0774112	0.283798	0.195347	-0.246911	-0.0405242	-0.099492	-0.128976	-0.0405242	0.0184435	0.136379	0.254314	0.637605	0.902959	0.519669	0.283798	-0.0700081	-0.15846	0.165863	-0.0110404	0.106895	0.224831	0.0774112	0.519669	0.342766	0.578637
EMR17007_20170614_S_11B	M		L	-0.145953	-0.0734287	0.0716196	-0.0734287	0.144144	-0.0734287	0.144144	-0.0734287	-0.0734287	-0.0734287	-0.0734287	0.0716196	-0.145953	-0.000904573	-0.145953	-0.000904573	-0.0734287	-0.000904573	-0.145953	-0.145953	-0.0734287	-0.145953	-0.145953	-0.145953	-0.145953	-0.000904573	-0.0734287	0.0716196	-0.000904573	-0.0734287	-0.145953	-0.145953	-0.0734287	-0.0734287	-0.145953	-0.000904573	0.0716196	-0.000904573	-0.000904573	-0.0734287
EMR17007_20170614_S_17A	M	X	L	0.364579	-0.0188321	0.287897	0.211215	-0.0188321	0.0578502	-0.210538	0.211215	-0.0955143	0.134532	0.211215	0.172874	-0.133855	-0.172197	-0.210538	-0.0955143	-0.0955143	-0.248879	0.0961913	-0.133855	-0.210538	-0.133855	-0.0571732	-0.0188321	-0.133855	-0.133855	-0.0188321	-0.0188321	-0.0571732	0.0195091	-0.0188321	0.134532	0.134532	0.0961913	0.134532	0.364579	0.134532	0.0961913	0.211215	0.287897
EMR17007_20170614_S_17B	M		L	0.144749	0.271303	0.208026	0.0814716	0.0498331	0.0181946	-0.0134439	0.208026	-0.0134439	-0.0134439	0.144749	-0.171636	-0.298191	-0.266552	-0.108359	-0.234914	-0.139998	-0.0134439	-0.203275	-0.266552	-0.203275	-0.0767209	-0.139998	-0.234914	-0.108359	-0.139998	-0.203275	-0.0450824	-0.203275	-0.203275	-0.139998	-0.139998	0.0814716	0.0498331	0.0498331	0.0181946	-0.139998	0.0814716	0.11311	-0.203275
EMR17007_20170614_S_23A	M	X	R	0.392388	0.351187	0.176084	0.103982	0.196684	0.114283	0.134883	0.145183	0.206984	0.0730817	0.0524812	0.176084	0.145183	0.268786	0.0524812	0.0215806	0.0730817	0.0524812	0.227585	0.0936821	0.248185	0.268786	0.680794	0.691095	0.732295	1.1134	1.20611	1.36061	1.38121	1.25761	1.43271	1.0619	0.897099	0.433589	0.124583	-0.112322	-0.235925	-0.0814216	0.186384	0.330587
EMR17007_20170614_S_23B	M	X	R	0.164145	0.319006	0.357722	0.306101	0.267386	0.228671	0.00928356	-0.0294318	-0.145578	-0.0423369	-0.171388	-0.235914	-0.210103	-0.132673	0.0479989	-0.00362156	-0.106862	-0.158483	-0.0939574	-0.0294318	0.060904	0.306101	0.267386	0.422247	0.409342	0.344817	0.654539	0.75778	0.331911	0.254481	0.331911	-0.0423369	0.15124	-0.119768	-0.0681471	0.138335	0.189955	0.15124	-0.0165267	-0.0681471
EMR17007_20170614_S_27A	M	X	R	0.0893639	0.185647	-0.0619378	0.0618545	0.185647	0.185647	0.295684	0.350703	0.295684	0.625797	1.02468	1.29978	0.804608	1.0797	0.969665	0.639552	0.74959	0.185647	-0.18573	-0.18573	-0.144466	-0.0481831	-0.00691901	0.226911	0.309439	0.364458	1.12097	1.25851	1.46483	1.12097	0.639552	0.185647	0.0618545	-0.0756925	-0.282013	-0.0481831	0.185647	0.72208	0.914646	1.17599
EMR17007_20170614_S_27B	M		R	-0.165046	-0.21314	-0.116953	-0.0207666	-0.0688599	-0.116953	-0.165046	-0.116953	-0.116953	-0.0688599	-0.165046	0.0273266	-0.165046	-0.165046	-0.0688599	-0.116953	-0.0207666	-0.165046	-0.21314	0.0273266	-0.21314	-0.0207666	0.0754199	-0.116953	-0.0688599	0.0754199	-0.116953	-0.116953	-0.21314	-0.116953	-0.0688599	-0.165046	-0.165046	-0.165046	-0.21314	-0.165046	-0.116953	-0.0207666	0.460166	0.460166
EMR17008_20170629_S_01A	M	X	R	0.0449298	-0.057583	0.0449298	0.0859349	-0.139593	0.00392465	0.00392465	0.20895	0.0244272	0.188448	0.20895	0.249955	0.0244272	0.229453	0.0654323	-0.0780856	-0.221603	-0.160096	-0.0780856	-0.139593	-0.180598	0.0449298	0.229453	0.20895	0.188448	0.454981	0.721514	0.536991	0.475483	0.762519	0.680509	0.454981	0.00392465	-0.426629	-0.365121	-0.59065	-0.365121	-0.549644	-0.344619	-0.426629
EMR17008_20170629_S_01B	M	X	L	0.0303575	-0.127228	0.187943	0.0933917	-0.0326766	0.187943	0.187943	0.314011	0.187943	0.124909	0.250977	0.377045	0.566148	0.566148	0.566148	0.786767	0.881319	1.19649	0.849802	0.786767	0.471597	0.21946	0.156426	0.250977	0.156426	-0.0641937	-0.127228	-0.284813	-0.127228	-0.253296	-0.221779	-0.190262	-0.253296	-0.127228	-0.253296	-0.190262	0.124909	0.0618746	0.534631	0.944353
EMR17008_20170629_S_01C	M	X	L	0.406704	0.323995	0.131008	0.296426	0.131008	0.103439	0.213717	0.213717	0.186147	0.103439	0.158578	0.131008	0.296426	0.158578	-0.0619789	-0.144688	-0.227396	-0.282536	-0.172257	-0.0619789	-0.310105	-0.282536	-0.254966	-0.144688	-0.172257	-0.0895485	0.0207299	0.186147	-0.0895485	-0.144688	0.0482995	-0.227396	-0.227396	0.0207299	0.0482995	0.158578	-0.172257	-0.310105	-0.365244	-0.282536
EMR17008_20170629_S_01D	M	X	L	-0.152768	0.113043	-0.152768	-0.093699	-0.093699	0.142578	0.172113	0.0835088	0.172113	-0.300442	0.142578	-0.0641644	0.0835088	0.0244395	-0.0050951	-0.359511	0.0539742	-0.270907	-0.182303	-0.389045	-0.182303	-0.152768	-0.211838	-0.0050951	-0.152768	-0.0641644	-0.152768	-0.300442	-0.0050951	-0.329976	-0.152768	-0.182303	-0.270907	0.0244395	-0.093699	-0.359511	-0.389045	-0.389045	-0.300442	-0.0641644
EMR17008_20170629_S_03A	M		L	0.277512	0.435687	0.0761996	0.0905791	0.133718	0.0618201	-0.139493	0.219994	0.277512	0.176856	0.0330611	0.263133	0.205615	0.363789	0.205615	0.176856	0.248753	0.148097	-0.0100773	0.248753	-0.0100773	-0.21139	-0.0819748	0.00430215	-0.125113	-0.0532158	0.0186816	0.0618201	-0.110734	-0.21139	-0.0388363	-0.455841	-0.412703	-0.326426	-0.470221	-0.240149	0.104959	0.306271	0.0761996	0.306271
EMR17008_20170629_S_05A	M	X	L	-0.200596	-0.0130955	-0.0130955	-0.0666672	-0.173811	-0.280954	-0.200596	-0.522026	-0.0398813	-0.0666672	-0.0130955	0.174405	-0.093453	-0.0666672	0.0940478	-0.200596	0.067262	-0.0398813	0.0404762	-0.147025	-0.173811	0.067262	-0.200596	-0.30774	-0.254168	-0.495241	-0.602384	-0.682741	-0.548812	-0.548812	-0.254168	0.14762	0.46905	0.683336	0.254763	0.227977	-0.254168	-0.254168	-0.227382	-0.441669
EMR17008_20170629_S_09A	M	X	L	0.237841	0.177949	0.207895	0.177949	0.148003	-0.0915666	0.237841	0.177949	0.0581643	0.32768	0.148003	0.237841	0.148003	0.267788	-0.0616204	0.0581643	-0.0616204	0.0581643	-0.181405	-0.271244	-0.181405	0.0581643	0.0282182	-0.0915666	-0.0616204	0.0581643	0.0881105	0.207895	0.148003	0.986496	1.07633	0.687034	0.267788	0.177949	0.177949	0.0282182	0.207895	-0.0316742	0.0282182	-0.181405
EMR17008_20170629_S_11A	M	X	L	0.0640558	0.0171628	0.110949	0.0640558	-0.076623	-0.0297301	-0.123516	-0.100069	0.0171628	-0.00628363	0.0640558	-0.0531766	-0.00628363	-0.0531766	-0.123516	-0.146962	-0.170409	-0.146962	-0.123516	-0.170409	-0.076623	-0.076623	-0.0531766	0.0171628	-0.076623	-0.00628363	0.0640558	-0.146962	-0.170409	-0.217302	-0.193855	0.0640558	0.532985	1.14259	1.35361	0.931575	0.251627	-0.0531766	-0.146962	-0.193855
EMR17008_20170629_S_11B	M	X	R	0.0091665	0.0535097	0.142196	0.0535097	0.408255	0.0978529	0.0978529	0.319569	0.0978529	0.0091665	0.186539	0.0535097	0.0978529	0.0978529	-0.168206	-0.0795199	-0.21255	-0.0351767	-0.301236	0.0535097	0.142196	0.0535097	0.541285	0.807344	0.496942	0.984717	1.16209	0.763001	0.585628	1.0734	1.16209	0.674315	0.230883	0.186539	-0.0795199	-0.21255	-0.21255	-0.21255	-0.256893	-0.301236
EMR17008_20170629_S_11C	M	X	R	0.110223	0.601708	0.639514	0.0346105	0.185836	0.185836	0.223643	0.0346105	0.072417	0.0346105	0.299256	-0.00319601	0.223643	0.14803	0.110223	0.072417	0.185836	0.337062	0.601708	0.374869	0.299256	0.639514	0.677321	0.601708	0.337062	0.261449	-0.154422	-0.267841	-0.305648	-0.305648	-0.154422	0.110223	0.299256	0.828547	0.374869	-0.154422	-0.192228	-0.230035	-0.116615	-0.00319601
EMR17008_20170629_S_17A	M	X	L	0.107217	0.0839113	0.153829	0.0139941	0.0606056	0.130523	-0.0792288	0.177134	-0.00931158	0.0372999	-0.0792288	0.20044	-0.00931158	0.0372999	-0.102534	-0.428815	-0.382203	-0.545343	-0.731789	-0.61526	-0.638566	-0.545343	-0.661872	-0.219063	-0.0326173	0.20044	0.20044	0.410191	0.456803	-0.055923	-0.358897	-0.545343	-0.708483	-0.498732	0.0372999	0.130523	0.0839113	-0.0792288	0.0839113	0.177134
EMR17008_20170629_S_17B	M		L	0.0774989	0.132821	0.0774989	0.243464	0.10516	-0.116128	-0.00548387	0.0221771	-0.0608057	0.215804	-0.0608057	0.132821	0.0774989	-0.19911	-0.254432	-0.0331448	0.0774989	-0.254432	-0.171449	-0.254432	0.0221771	-0.226771	-0.171449	0.160482	-0.171449	-0.171449	-0.0884666	0.049838	-0.0884666	-0.0331448	-0.0331448	-0.143788	-0.0331448	0.0774989	-0.0608057	-0.254432	-0.116128	-0.226771	-0.254432	-0.226771
EMR17008_20170629_S_17C	M	X	L	0.226126	0.169428	0.11273	0.0371329	0.0182337	0.11273	0.282823	0.320622	0.0938307	-0.000665594	0.320622	0.188327	-0.170759	0.434017	0.0182337	-0.15186	0.0749314	-0.13296	-0.0951619	-0.246356	-0.114061	-0.15186	-0.548744	-0.39755	-0.321953	-0.416449	-0.416449	-0.39755	-0.359752	-0.321953	0.131629	-0.0573634	-0.340852	-0.303054	-0.39755	-0.189658	-0.265255	-0.227457	-0.0195649	-0.246356
EMR17008_20170629_S_19A	M	X	R	-0.0738422	0.0264488	0.327322	-0.0989149	-0.0989149	0.101667	0.00137604	0.12674	0.101667	-0.0989149	0.00137604	0.101667	0.0515215	0.0765943	-0.123988	0.151813	0.00137604	0.252103	0.40254	0.578049	0.527904	1.00429	0.828777	0.753558	0.753558	0.452685	0.477758	-0.0236967	0.0765943	0.0515215	0.578049	1.25501	1.80661	1.80661	1.25501	1.33023	0.477758	0.201958	0.0765943	-0.0487695
EMR17008_20170629_S_19B	M	X	L	0.28461	0.648294	0.28461	0.265469	0.188904	0.265469	0.322893	0.28461	0.43774	0.342034	0.59087	0.361175	0.112339	-0.0407906	-0.289627	-0.0407906	-0.251344	-0.0599318	-0.079073	-0.0599318	-0.079073	0.0357743	0.208045	-0.079073	0.112339	-0.0599318	-0.270485	-0.461898	-0.385333	0.0740568	0.610011	1.49051	2.10303	2.08389	1.45223	0.992836	0.916271	0.361175	0.361175	0.399458
EMR17008_20170629_S_19C	M		L	0.186019	0.167345	0.0739752	0.0366274	-0.0567421	-0.0567421	0.111323	-0.0940899	-0.0567421	0.129997	-0.0567421	-0.0940899	-0.224807	-0.0567421	-0.336851	-0.131438	-0.0940899	-0.131438	-0.168786	0.0553013	-0.131438	-0.075416	0.0179535	0.0739752	-0.0193943	-0.150112	-0.112764	-0.224807	-0.262155	0.186019	0.0926491	0.0926491	0.970322	0.970322	1.02634	0.652866	0.0739752	-0.0193943	-0.168786	-0.168786
EMR17008_20170629_S_21A	M	X	L	-0.184784	-0.0685903	-0.171874	-0.0685903	-0.236426	-0.0944112	-0.210605	-0.3268	-0.0944112	-0.158964	-0.210605	-0.146053	-0.275158	-0.262247	-0.430083	-0.494636	-0.597919	-0.765755	-0.675382	-0.662472	-0.804487	-0.714114	-0.778666	-0.533367	-0.262247	-0.236426	-0.0685903	-0.0556798	0.0734248	-0.184784	-0.546278	-0.649561	-0.765755	-0.662472	-0.275158	-0.249337	-0.0169484	-0.262247	-0.0815008	0.021783
EMR17008_20170629_S_21B	M	X	L	-0.02189	-0.222727	-0.222727	-0.0469946	-0.147413	-0.222727	0.153842	-0.0972038	0.103633	0.178947	0.0785285	0.0785285	-0.0720992	-0.0720992	-0.0720992	-0.122308	-0.122308	-0.147413	0.00321465	0.178947	0.0534239	0.204052	0.329575	-0.0720992	0.254261	0.0534239	0.103633	-0.222727	-0.197622	0.379784	0.605726	1.08271	1.20824	0.379784	0.0283193	-0.122308	-0.172518	-0.122308	-0.222727	-0.0469946
EMR17008_20170629_S_21C	M	X	R	0.0598049	0.376089	0.443865	0.421273	0.217947	0.330906	0.466456	0.805333	0.669782	0.376089	0.534232	0.647191	0.556824	1.03125	0.737558	0.940883	0.850516	1.05384	1.21198	1.30235	0.986067	0.760149	1.07643	1.48309	1.23458	1.27976	1.09903	1.30235	1.21198	1.4379	1.30235	1.03125	1.09903	0.466456	0.217947	-0.00797041	-0.120929	-0.301663	-0.25648	-0.211296
EMR17008_20170629_S_21D	M	X	R	-0.156287	-0.0148416	-0.0502029	-0.156287	-0.0855643	0.161965	-0.297733	-0.333094	-0.22701	-0.333094	-0.262371	-0.439178	-0.439178	-0.474539	-0.403817	-0.509901	-0.403817	-0.439178	-0.403817	-0.297733	-0.120926	-0.262371	-0.22701	-0.0855643	0.338772	0.657025	0.621663	0.763109	0.727747	0.268049	0.197327	-0.156287	-0.439178	-0.545262	-0.333094	-0.403817	-0.474539	-0.509901	-0.509901	-0.333094
EMR17008_20170629_S_23A	M	X	L	-0.12112	-0.205814	-0.248162	-0.163467	-0.12112	-0.0364254	-0.142294	-0.057599	-0.12112	-0.184641	0.0482691	-0.184641	-0.269335	-0.057599	-0.248162	-0.459898	-0.290509	-0.269335	-0.396377	-0.459898	-0.502245	-0.459898	-0.565766	-0.481072	-0.629287	-0.523419	-0.544593	-0.565766	-0.565766	-0.544593	-0.544593	-0.35403	-0.523419	-0.481072	-0.544593	-0.375204	-0.438724	-0.375204	-0.163467	-0.057599
EMR17008_20170629_S_23B	M	X	L	0.0705285	-0.0716039	-0.270589	-0.114244	-0.270589	-0.0858172	-0.0573907	-0.18531	-0.213736	-0.256376	-0.22795	-0.242163	-0.412722	-0.10003	-0.18531	-0.213736	-0.0716039	-0.156883	0.113168	0.0705285	-0.128457	0.0563152	0.170021	0.397433	0.255301	0.212661	0.0847417	-0.0431774	-0.498001	-0.58328	-0.611707	-0.299016	0.127381	0.496926	0.539565	0.539565	0.425859	0.454286	0.283727	0.170021
EMR17008_20170629_S_23C	M	X	L	0.349241	0.238197	0.265958	0.363121	0.3076	0.515807	0.377002	0.349241	0.62685	0.460285	0.62685	0.696253	0.62685	0.3076	0.252078	0.057751	-0.164337	-0.289261	-0.441946	-0.594631	-0.719555	-0.719555	-0.650153	-0.830599	-0.525229	-0.636273	-0.691794	-0.705675	-0.84448	-0.969404	-0.969404	-0.983284	-0.816719	-0.469707	-0.0532927	0.654611	0.890579	1.04326	1.22371	1.02938
EMR17008_20170629_S_23D	M	X	L	-0.123093	-0.160834	-0.160834	-0.198575	-0.311799	-0.274058	-0.236316	-0.34954	-0.123093	-0.274058	-0.34954	-0.34954	-0.34954	-0.387281	-0.34954	-0.425023	-0.425023	-0.274058	-0.34954	-0.425023	-0.462764	-0.34954	-0.387281	-0.311799	-0.387281	-0.311799	-0.387281	-0.425023	-0.462764	-0.462764	-0.425023	-0.236316	-0.34954	-0.387281	-0.236316	-0.236316	-0.311799	-0.387281	-0.387281	-0.311799
EMR17008_20170629_S_23E	M	X	L	0.405215	0.889623	0.889623	0.975107	0.718656	0.43371	1.0036	0.918118	1.0036	0.861129	0.975107	1.545	1.26005	1.08909	0.74715	0.490699	0.490699	0.148764	0.262742	0.0917745	-0.193172	-0.278655	-0.136182	-0.136182	-0.107688	0.120269	-0.0222039	-0.164677	-0.221666	-0.335645	-0.478118	-0.506612	-0.392634	0.0632799	0.348226	1.31704	1.17457	1.14607	0.918118	0.861129
EMR17008_20170629_S_25A	M	X	R	0.203626	0.0975367	0.150582	0.256671	0.203626	-0.0881204	-0.167688	0.177104	0.495373	0.0444918	0.415806	0.336239	0.389284	0.0179694	0.336239	0.336239	0.627986	0.734075	0.521896	0.866688	0.9993	0.230149	0.415806	0.203626	-0.167688	-0.220733	-0.19421	-0.220733	0.0179694	-0.114643	-0.0881204	-0.114643	-0.220733	-0.220733	-0.220733	-0.220733	-0.220733	-0.220733	-0.167688	-0.114643
EMR17008_20170629_S_25B	M		R	-0.11091	0.188032	0.038561	0.0684552	0.0983495	-0.0511218	0.337504	0.0983495	0.486975	0.0684552	0.128244	0.427186	0.8756	0.128244	0.247821	0.397292	0.128244	0.307609	0.158138	0.128244	0.158138	0.158138	0.158138	0.337504	0.277715	0.00866673	0.00866673	-0.200593	-0.11091	-0.140805	-0.11091	-0.230487	-0.260382	-0.11091	0.00866673	0.038561	0.158138	-0.0511218	-0.11091	-0.081016
EMR17008_20170629_S_27A	M		L	-0.143896	0.11731	0.0302412	0.00121827	-0.143896	-0.0278046	-0.259988	-0.0278046	-0.143896	-0.114873	-0.289011	-0.0858504	0.146333	-0.230965	-0.347057	-0.143896	-0.201942	-0.201942	0.0302412	-0.114873	-0.114873	-0.201942	-0.172919	-0.201942	-0.259988	-0.201942	-0.347057	-0.347057	0.00121827	0.088287	0.552653	0.639722	0.523631	0.146333	-0.114873	-0.289011	-0.434125	-0.172919	-0.463148	-0.143896
EMR17008_20170629_S_27B	M	X	L	-0.0662122	0.101162	0.101162	-0.0104207	0.435911	-0.0662122	0.0453707	-0.0662122	0.0453707	-0.0104207	-0.0662122	0.268537	0.101162	-0.0662122	0.0453707	-0.122004	-0.0104207	-0.122004	-0.0104207	-0.177795	-0.0662122	-0.177795	-0.122004	-0.177795	-0.177795	-0.122004	-0.0662122	0.0453707	-0.0662122	0.714868	0.491702	0.268537	0.156954	0.268537	0.324328	0.212745	-0.0104207	0.0453707	-0.122004	-0.0104207
EMR17008_20170629_S_29A	M	X	R	-0.187074	0.277487	-0.063191	0.494283	0.122634	0.308458	-0.00124952	0.0297212	0.060692	0.122634	0.122634	0.184575	0.060692	0.122634	0.060692	-0.00124952	-0.063191	-0.125133	0.184575	-0.00124952	-0.00124952	0.060692	-0.156103	0.0297212	0.40137	0.463312	0.184575	0.153604	-0.00124952	0.0916628	-0.0322203	0.246517	0.153604	0.525253	-0.0322203	-0.0941618	-0.218045	-0.0322203	0.122634	0.060692
EMR17008_20170629_S_29B	M	X	R	0.0179474	0.0179474	0.0179474	0.114526	-0.0786309	0.211104	0.211104	-0.0786309	0.211104	0.211104	0.404261	0.114526	0.0179474	0.0179474	0.0179474	0.211104	0.597417	0.500839	0.307682	0.500839	0.887152	0.983731	1.46662	1.37004	1.46662	1.37004	0.404261	0.211104	0.114526	0.0179474	0.0179474	0.211104	-0.0786309	0.307682	0.211104	0.0179474	0.211104	0.0179474	0.114526	0.114526

## Sheet: Propranolol LP Right
ID	sex	Sidepref	LP	Zscore -3	-2.9	-2.8	-2.7	-2.6	-2.5	-2.4	-2.3	-2.2	-2.1	-2	-1.9	-1.8	-1.7	-1.6	-1.5	-1.4	-1.3	-1.2	-1.1	-1	-0.9	-0.8	-0.7	-0.6	-0.5	-0.4	-0.3	-0.2	-0.1	0	0.1	0.2	0.3	0.4	0.5	0.6	0.7	0.8	0.9
CDH16002_20161103_PA10_01A	F		R	0.556184	0.100275	0.499195	0.214252	0.328229	0.271241	0.214252	0.556184	0.157263	0.442206	0.556184	0.0432863	0.328229	0.727149	0.214252	0.385218	0.157263	0.157263	0.100275	0.157263	-0.184668	0.271241	0.385218	-0.0137023	-0.0137023	-0.412622	0.157263	-0.355634	-0.241657	-0.355634	-0.298645	-0.0706909	-0.12768	-0.355634	-0.241657	-0.469611	-0.0706909	-0.0137023	0.0432863	0.328229
CDH16002_20161103_PA10_17A	F		R	-0.25245	-0.0974419	0.0575659	0.212574	-0.25245	-0.25245	0.367581	-0.0974419	-0.25245	0.0575659	0.0575659	0.212574	0.212574	0.212574	-0.25245	-0.0974419	-0.25245	-0.25245	-0.25245	0.0575659	-0.0974419	0.367581	0.212574	-0.25245	-0.0974419	0.0575659	-0.0974419	-0.0974419	-0.25245	-0.25245	0.0575659	-0.0974419	0.0575659	-0.0974419	-0.25245	0.0575659	-0.0974419	0.367581	-0.0974419	-0.25245
CDH16002_20161103_PA10_19A	F		R	0.187825	-0.169283	-0.169283	-0.169283	-0.169283	-0.169283	-0.169283	-0.169283	-0.169283	-0.169283	-0.169283	-0.169283	-0.169283	-0.169283	-0.169283	-0.169283	-0.169283	-0.169283	-0.169283	-0.169283	-0.169283	-0.169283	-0.169283	0.00927125	-0.169283	0.00927125	0.00927125	-0.169283	-0.169283	0.187825	0.902041	1.08059	2.33047	1.97336	3.04469	2.68758	1.97336	1.25915	1.08059	0.902041
CDH16002_20161103_PA10_19B	F	X	R	-0.418721	-0.27154	-0.173419	-0.467781	-0.369661	-0.516842	-0.3206	-0.22248	-0.467781	-0.418721	-0.565902	-0.369661	-0.0752987	-0.173419	-0.369661	-0.565902	-0.516842	-0.3206	-0.369661	-0.22248	-0.418721	-0.467781	-0.124359	-0.173419	-0.369661	-0.27154	-0.3206	-0.516842	-0.713083	-0.467781	-0.664023	-0.565902	-0.811204	-0.664023	-0.664023	-0.369661	-0.467781	-0.516842	-0.762143	-0.713083
CDH16002_20161103_PA10_19C	F		R	0.454335	0.1261	0.308453	0.16257	0.16257	-0.0197829	0.855512	0.235511	0.600218	0.235511	0.344923	0.673159	0.1261	0.16257	0.199041	0.235511	0.600218	0.1261	0.600218	0.271982	-0.129195	-0.129195	0.0531583	0.636688	0.381394	0.199041	0.417864	0.308453	0.600218	0.7461	0.235511	0.089629	0.0531583	0.636688	0.600218	0.563747	0.308453	0.563747	0.636688	0.782571
CDH16003_20161102_PA10_01A	F	X	L	-0.0414745	0.223289	-0.0792979	-0.0792979	0.261113	-0.0792979	-0.192768	-0.306238	-0.419709	-0.457532	-0.495355	-0.571002	-0.495355	-0.268415	-0.419709	-0.268415	-0.192768	-0.344062	-0.381885	-0.344062	-0.306238	-0.684472	-0.608826	-0.533179	-0.533179	-0.571002	-0.192768	0.147643	0.261113	0.185466	0.185466	-0.154945	-0.344062	-0.419709	-0.533179	-0.533179	-0.419709	-0.457532	-0.344062	-0.306238
CDH16003_20161102_PA10_25A	F	X	R	-0.0170969	-0.334406	0.220885	-0.0964241	0.141558	0.141558	-0.0964241	0.0622303	-0.175751	0.141558	0.141558	-0.0170969	0.0622303	0.0622303	-0.175751	-0.0964241	-0.255078	-0.0170969	-0.0170969	-0.0170969	-0.0964241	0.0622303	-0.0964241	0.379539	0.141558	-0.0170969	0.0622303	0.220885	0.617521	0.220885	0.141558	-0.0964241	0.141558	-0.175751	0.617521	0.141558	-0.175751	-0.175751	-0.0964241	-0.175751
CDH16005_20161107_PA10_05A	M	X	L	-0.225184	0.270926	0.270926	-0.142499	-0.0322523	0.243364	-0.059814	-0.00469066	0.022871	-0.114937	0.243364	0.326049	0.022871	0.243364	0.381173	0.574104	0.381173	0.601666	0.463858	0.270926	0.408734	0.849721	0.491419	0.574104	0.298488	0.0779943	0.326049	0.491419	0.270926	0.105556	0.215803	0.215803	0.0779943	0.243364	0.0779943	-0.0322523	-0.197622	-0.252746	-0.197622	-0.170061
CDH16005_20161107_PA10_07A	M	X	R	0.00853443	-0.371109	-0.168632	-0.0927037	0.00853443	-0.26987	0.135082	0.00853443	0.211011	-0.193942	0.489416	0.135082	0.514725	0.413487	0.388177	0.742511	0.540035	0.489416	0.742511	0.337558	0.489416	0.00853443	0.00853443	-0.421728	-0.649513	-0.674823	-0.750752	-0.750752	-0.902609	-0.725442	-0.750752	-0.649513	-0.700132	-0.396418	-0.143323	0.286939	0.590654	0.919678	0.869058	1.14746
CDH16005_20161107_PA10_09A	M		L	-0.0730765	0.0267632	0.376202	0.0267632	0.0267632	0.126603	0.276363	0.126603	-0.0231566	-0.0730765	-0.0231566	-0.122996	0.176523	-0.0231566	0.426122	0.426122	-0.0231566	0.126603	0.226443	0.376202	0.0267632	-0.122996	-0.0730765	-0.372596	-0.0730765	-0.272756	-0.422516	-0.0730765	-0.172916	-0.322676	-0.172916	-0.0231566	0.176523	0.0267632	-0.272756	-0.122996	-0.172916	0.0267632	0.276363	0.575882
CDH16005_20161107_PA10_09B	M		R	0.305766	0.109881	-0.037033	0.256794	0.0609095	-0.0860042	0.109881	0.158852	0.158852	0.0119382	0.207823	0.256794	-0.037033	-0.0860042	0.0119382	-0.037033	0.207823	0.158852	-0.0860042	0.109881	0.207823	0.0609095	-0.037033	-0.183947	0.256794	0.0609095	0.207823	0.109881	0.109881	-0.134975	-0.232918	-0.134975	0.207823	-0.134975	-0.183947	-0.0860042	0.207823	0.256794	0.158852	0.207823
CDH16005_20161107_PA10_13A	M	X	R	-0.0558974	0.161237	0.631695	0.233615	-0.236843	-0.0920865	0.233615	0.125048	0.342183	0.0526699	0.342183	0.305994	-0.0920865	0.125048	0.45075	0.414561	0.088859	0.125048	-0.0920865	0.197426	-0.0558974	0.378372	-0.0197083	0.197426	-0.0558974	0.269804	-0.0197083	-0.0197083	-0.164465	-0.309221	-0.381599	-0.164465	-0.273032	0.0164808	0.161237	-0.128276	0.125048	0.161237	-0.0920865	-0.273032
CDH16005_20161107_PA10_15A	M		R	0.290583	-0.0782188	0.106182	0.179942	-0.00445851	0.0693018	0.143062	-0.00445851	-0.188859	-0.115099	-0.33638	-0.151979	-0.262619	-0.0413387	0.0324216	0.106182	0.253702	-0.188859	0.0324216	-0.188859	-0.225739	-0.2995	-0.0782188	-0.262619	0.290583	0.290583	0.511863	0.511863	0.364343	0.216822	0.585624	0.216822	0.216822	0.179942	0.143062	-0.115099	-0.2995	0.143062	-0.262619	0.0324216
CDH16005_20161107_PA10_21A	M	X	L	-0.218734	0.156343	0.0986391	-0.189882	-0.189882	-0.16103	-0.132178	-0.276439	-0.420699	-0.189882	-0.449552	-0.478404	-0.334143	-0.56496	-0.305291	-0.218734	-0.362995	-0.276439	-0.218734	-0.334143	-0.0744737	-0.16103	-0.362995	-0.103326	-0.103326	-0.507256	-0.911186	-0.795777	-0.56496	-0.478404	-0.391847	-0.478404	-0.362995	-0.247587	-0.305291	-0.189882	-0.189882	-0.0744737	-0.305291	-0.247587
CDH16005_20161107_PA10_21B	M		R	0.114966	-0.0385862	0.114966	-0.192139	-0.0385862	0.114966	-0.0897703	-0.0385862	-0.0385862	-0.0385862	-0.0897703	-0.192139	-0.0897703	0.217334	0.0125979	-0.192139	-0.192139	-0.140954	-0.192139	-0.0385862	0.16615	-0.140954	0.114966	0.217334	0.319702	0.575623	0.16615	0.268518	-0.294507	-0.192139	-0.140954	0.0637819	-0.140954	-0.345691	-0.140954	0.0125979	-0.294507	0.0637819	0.0637819	-0.243323
CDH16005_20161107_PA10_21C	M		L	-0.00987784	0.118308	-0.00987784	0.118308	-0.0739707	0.054215	-0.0739707	-0.00987784	-0.00987784	-0.138064	0.374679	0.054215	0.054215	-0.138064	-0.00987784	-0.138064	-0.138064	-0.138064	-0.0739707	-0.202156	-0.0739707	-0.138064	-0.0739707	0.118308	-0.202156	0.118308	0.054215	-0.0739707	-0.266249	-0.0739707	-0.00987784	0.118308	0.246494	0.246494	-0.0739707	0.054215	-0.138064	-0.202156	-0.138064	-0.138064
CDH16008_20161102_PA10_19A	M	X	R	0.105206	-0.00536633	0.215779	0.381638	0.215779	-0.00536633	0.105206	0.105206	0.160493	0.326352	0.547498	0.547498	0.602784	0.105206	0.0499201	0.160493	-0.00536633	-0.115939	-0.115939	-0.0606527	-0.115939	-0.115939	0.105206	-0.171226	-0.0606527	-0.115939	0.82393	2.1508	4.08583	5.79971	4.14111	4.1964	2.48252	1.98494	1.54265	0.65807	0.492211	0.160493	0.0499201	0.160493
CDH16010_20161104_PA10_01A	F		R	-0.0233625	0.286815	0.286815	0.183423	0.08003	-0.0233625	0.183423	0.183423	-0.0233625	0.4936	0.390208	-0.0233625	0.183423	-0.0233625	0.4936	0.08003	0.08003	0.08003	-0.126755	0.08003	-0.0233625	0.4936	0.390208	0.596993	0.183423	0.286815	0.183423	0.286815	0.08003	-0.0233625	-0.0233625	-0.126755	0.700385	0.803778	0.08003	0.596993	0.700385	1.11396	0.390208	0.803778
CDH16010_20161104_PA10_01B	F	X	R	-0.371319	0.204523	-0.227358	0.0605624	-0.227358	-0.083398	-0.299339	-0.083398	-0.155378	-0.083398	-0.227358	-0.0114178	-0.299339	0.0605624	-0.227358	-0.083398	-0.155378	-0.299339	0.348483	0.492444	0.492444	0.132543	-0.083398	0.132543	-0.155378	-0.227358	-0.371319	-0.443299	-0.371319	-0.299339	-0.371319	-0.371319	-0.083398	-0.371319	-0.227358	0.348483	0.492444	0.0605624	0.204523	0.276503
CDH16010_20161104_PA10_01C	F		L	-0.0860229	-0.0860229	-0.258758	-0.0860229	-0.258758	-0.0860229	-0.258758	-0.258758	-0.0860229	-0.258758	-0.258758	-0.258758	-0.0860229	-0.258758	0.259447	-0.0860229	-0.0860229	-0.258758	-0.0860229	-0.258758	-0.258758	-0.0860229	-0.258758	-0.0860229	-0.258758	-0.258758	-0.258758	-0.258758	-0.258758	-0.258758	-0.258758	-0.0860229	0.086712	-0.0860229	0.432182	-0.0860229	0.604916	-0.0860229	0.086712	-0.0860229
CDH16010_20161104_PA10_05A	F		R	-0.30804	-0.439786	-0.11042	-0.30804	-0.176293	-0.30804	-0.373913	-0.439786	-0.50566	-0.373913	-0.439786	-0.176293	-0.439786	-0.50566	-0.30804	-0.242166	-0.176293	-0.176293	-0.176293	-0.176293	-0.30804	-0.373913	-0.373913	-0.242166	-0.11042	-0.439786	-0.439786	-0.30804	-0.176293	-0.242166	-0.373913	-0.242166	-0.30804	-0.30804	-0.176293	-0.373913	-0.11042	-0.439786	-0.30804	-0.571533
CDH16010_20161104_PA10_05B	F		R	-0.117988	-0.117988	0.180768	0.180768	-0.0184029	-0.0184029	-0.117988	0.479525	-0.117988	0.0811826	0.0811826	0.180768	-0.217574	-0.117988	0.0811826	-0.217574	-0.0184029	-0.217574	0.479525	-0.217574	0.0811826	-0.217574	-0.117988	-0.0184029	0.180768	-0.0184029	0.280354	-0.0184029	0.0811826	0.180768	-0.317159	-0.217574	0.0811826	-0.317159	-0.117988	-0.317159	-0.317159	-0.317159	-0.0184029	-0.0184029
CDH16010_20161104_PA10_05C	F	X	R	-0.169964	0.0550468	-0.544981	-0.319971	-0.0949601	-0.169964	-0.169964	-0.469978	-0.244967	-0.244967	-0.619984	-0.0949601	-0.0199567	0.0550468	-0.169964	0.355061	0.13005	-0.244967	-0.0949601	-0.244967	0.13005	0.205054	-0.0199567	-0.244967	-0.319971	-0.169964	-0.0199567	0.655075	0.580071	0.205054	-0.0199567	-0.0949601	-0.0199567	-0.0199567	0.13005	0.0550468	0.505068	0.0550468	-0.0199567	0.205054
CDH16010_20161104_PA10_07A	F	X	R	0.140408	0.423025	-0.142208	0.493679	-0.000899693	0.281717	0.352371	0.423025	0.140408	0.423025	0.140408	0.140408	0.352371	0.493679	0.917603	0.705641	0.352371	0.140408	0.281717	0.423025	0.423025	0.634987	0.917603	0.564333	0.140408	0.493679	0.634987	0.634987	0.493679	0.988257	0.564333	0.564333	1.27087	0.776295	0.705641	0.917603	0.423025	0.846949	1.05891	1.05891
CDH16010_20161104_PA10_07B	F	X	R	0.115679	0.00967546	0.00967546	0.327687	0.00967546	0.115679	0.327687	0.327687	0.327687	0.00967546	0.221683	0.221683	0.00967546	0.433691	-0.0963285	-0.202333	0.327687	0.221683	0.221683	0.539695	0.221683	0.221683	0.539695	0.645699	0.221683	0.857707	0.327687	1.38773	0.327687	-0.0963285	0.327687	0.327687	0.327687	-0.202333	0.327687	-0.0963285	0.00967546	0.539695	0.433691	0.433691
CDH16010_20161104_PA10_11A	F		R	0.107336	0.634525	-0.185546	0.634525	0.341642	-0.185546	-0.00981682	0.107336	0.165913	0.0487597	0.107336	-0.185546	-0.185546	-0.185546	0.165913	0.341642	0.400219	0.283066	0.107336	0.165913	0.165913	-0.185546	-0.00981682	-0.244123	0.283066	0.341642	0.224489	1.22029	1.10314	1.10314	0.575948	1.16171	0.868831	0.341642	-0.12697	0.341642	0.165913	-0.361276	-0.12697	0.107336
CDH16010_20161104_PA10_13A	F	X	R	0.183223	-0.0604743	0.10199	0.42692	-0.141707	0.508153	0.508153	0.42692	0.183223	0.508153	0.183223	0.508153	-0.0604743	0.42692	0.264455	0.264455	0.0207581	0.42692	0.508153	1.15801	1.15801	1.15801	0.670617	1.64541	0.833082	0.914315	0.508153	0.10199	0.264455	0.10199	-0.0604743	0.264455	-0.141707	0.10199	-0.141707	-0.0604743	-0.222939	0.264455	0.10199	0.264455
CDH16010_20161104_PA10_15A	F	X	L	0.0782603	0.0782603	0.141175	0.770325	0.392835	0.32992	0.58158	0.141175	0.58158	0.20409	-0.236315	0.0782603	-0.299229	0.0782603	-0.0475696	0.20409	0.141175	-0.1734	-0.299229	-0.110485	-0.487974	-0.236315	-0.299229	-0.0475696	-0.110485	-0.362144	-0.110485	-0.236315	-0.1734	-0.236315	0.20409	-0.362144	-0.110485	-0.425059	-0.1734	-0.110485	0.0782603	0.267005	-0.0475696	0.0782603
CDH16010_20161104_PA10_15B	F	X	R	-0.132057	0.0484144	-0.312529	-0.132057	0.13865	0.319122	-0.0418213	0.228886	-0.132057	0.13865	-0.0418213	-0.0418213	0.0484144	0.228886	0.228886	0.0484144	0.13865	0.0484144	-0.0418213	-0.0418213	-0.222293	0.319122	0.13865	-0.0418213	-0.402764	-0.0418213	0.409357	0.0484144	-0.0418213	-0.402764	-0.312529	-0.222293	-0.402764	-0.132057	-0.402764	-0.0418213	-0.0418213	0.0484144	0.13865	-0.132057
CDH16010_20161104_PA10_17A	F		R	-0.244942	0.175765	0.123177	-0.192353	0.123177	0.123177	0.175765	0.280942	0.0180004	0.0180004	0.0180004	0.386119	0.123177	0.438707	0.175765	-0.139765	0.438707	0.0180004	0.123177	0.280942	0.859414	0.228354	0.543884	0.386119	0.543884	0.438707	-0.0871764	0.175765	-0.350118	-0.034588	-0.034588	0.0180004	0.123177	0.386119	0.438707	0.754238	0.701649	0.596472	0.754238	1.49047
CDH16010_20161104_PA10_17B	F	X	R	-0.374156	-0.552133	-0.374156	-0.10719	-0.641122	-0.196179	-0.285167	-0.463145	-0.10719	-0.196179	-0.463145	-0.0182014	-0.10719	-0.374156	-0.0182014	-0.552133	-0.10719	-0.285167	0.159776	-0.10719	0.337753	-0.10719	0.337753	0.0707872	0.51573	0.159776	0.159776	-0.552133	0.159776	0.248764	0.248764	0.337753	0.51573	-0.0182014	-0.0182014	-0.285167	-0.285167	-0.10719	-0.196179	-0.196179
CDH16010_20161104_PA10_17C	F		R	0.101135	-0.367574	0.194876	-0.18009	0.00739288	0.00739288	-0.18009	-0.0863487	0.101135	-0.0863487	0.00739288	-0.461315	-0.18009	-0.18009	-0.0863487	-0.367574	0.101135	-0.367574	-0.18009	-0.18009	-0.18009	-0.0863487	-0.0863487	0.00739288	-0.18009	-0.0863487	0.194876	0.101135	-0.18009	-0.367574	0.288618	0.101135	0.101135	-0.0863487	0.476101	0.194876	-0.18009	0.00739288	-0.0863487	-0.0863487
CDH16010_20161104_PA10_21A	F	X		0.33912	-0.0774384	0.130841	0.33912	0.130841	-0.0774384	0.130841	0.33912	0.130841	-0.285717	0.130841	0.33912	0.0267011	-0.181578	0.443259	0.33912	-0.0774384	-0.181578	0.130841	-0.493996	-0.181578	-0.389857	-0.285717	-0.285717	-0.389857	0.130841	-0.285717	-0.493996	-0.181578	-0.181578	-0.285717	-0.389857	0.0267011	-0.181578	0.0267011	-0.0774384	-0.285717	-0.0774384	0.0267011	-0.0774384
CDH16010_20161104_PA10_21B	F		R	0.0815749	0.0815749	0.270782	0.144644	0.0185059	-0.107632	0.333851	0.0185059	0.144644	-0.359908	0.0185059	0.0815749	0.0185059	0.333851	0.144644	0.0185059	0.0815749	0.270782	0.144644	0.523058	0.207713	0.523058	0.270782	0.0815749	0.39692	-0.422977	0.0815749	-0.359908	-0.422977	-0.486046	-0.359908	-0.23377	-0.170701	0.0185059	-0.422977	-0.0445631	-0.422977	-0.549115	-0.170701	-0.0445631
CDH16010_20161104_PA10_21C	F	X	R	0.926294	0.854176	0.493589	0.709941	0.349354	0.349354	0.133001	0.133001	0.133001	-0.0112339	-0.0112339	0.421471	-0.0112339	0.277236	0.349354	0.421471	-0.299704	-0.0833514	0.205119	0.421471	-0.0112339	-0.371821	0.205119	-0.227586	0.133001	0.0608836	0.205119	0.349354	-0.155469	-0.0833514	0.565706	-0.0833514	0.0608836	-0.0112339	0.205119	0.493589	-0.0112339	0.277236	0.277236	-0.0112339
CDH16010_20161104_PA10_23A	F	X	R	0.148507	-0.377701	0.148507	-0.202298	-0.0268959	-0.377701	-0.0268959	-0.202298	-0.202298	-0.202298	-0.29	0.148507	-0.0268959	0.41161	-0.114597	-0.0268959	-0.114597	0.148507	0.0608053	0.148507	0.0608053	0.323909	-0.114597	0.499311	0.236208	-0.202298	-0.0268959	-0.0268959	-0.114597	0.236208	0.148507	0.41161	0.499311	0.236208	0.323909	0.236208	0.236208	0.0608053	-0.114597	-0.377701
CDH16010_20161104_PA10_23B	F	X	R	0.359643	0.306176	0.306176	0.626977	0.57351	0.626977	0.787378	0.733911	0.787378	0.41311	0.733911	0.306176	0.306176	0.57351	0.626977	0.466577	0.680444	0.41311	0.359643	0.57351	0.41311	0.57351	0.0923086	0.145775	0.0388418	0.359643	0.0388418	0.252709	0.57351	1.00125	0.840845	1.00125	1.74978	1.53591	1.21511	1.80325	1.53591	0.57351	1.21511	0.947778
CDH16010_20161104_PA10_23C	F	X	R	-0.141041	0.257802	-0.0612721	-0.0612721	-0.0612721	0.178033	0.0184964	0.257802	0.0184964	0.0982649	0.0982649	-0.300577	0.0982649	0.257802	0.417339	0.0982649	-0.220809	1.05549	0.497107	-0.0612721	0.33757	-0.0612721	0.497107	-0.141041	-0.141041	0.0184964	-0.220809	-0.300577	-0.0612721	0.257802	0.417339	0.497107	1.45433	1.45433	0.975718	0.816181	0.736413	0.257802	-0.300577	0.257802
CDH16010_20161104_PA10_23D	F		L	-0.312365	-0.399066	-0.225664	-0.225664	-0.0522616	-0.138963	0.121141	-0.0522616	-0.138963	-0.0522616	-0.0522616	-0.138963	0.0344396	-0.0522616	-0.399066	-0.225664	0.0344396	0.121141	-0.399066	0.0344396	0.121141	-0.0522616	-0.225664	-0.572469	-0.312365	-0.0522616	-0.485768	-0.225664	-0.225664	-0.485768	-0.312365	-0.138963	-0.312365	-0.312365	-0.312365	-0.312365	-0.312365	0.207842	-0.312365	0.207842
CDH16010_20161104_PA10_23E	F	X	R	-0.108451	0.145473	-0.0238095	-0.193092	-0.0238095	-0.277734	0.230115	0.145473	0.314756	-0.0238095	0.0608319	0.145473	-0.0238095	0.484039	0.399398	0.145473	0.230115	0.230115	0.737963	1.41509	1.58438	1.24581	1.92294	1.07653	1.16117	0.991888	1.16117	0.737963	1.41509	1.49974	1.75366	1.07653	1.16117	1.07653	0.484039	0.907246	0.56868	0.230115	0.737963	-0.108451
CDH16010_20161104_PA10_25A	F	X	L	-0.300748	-0.381073	-0.461398	-0.220424	-0.140099	-0.140099	-0.461398	-0.461398	-0.300748	-0.300748	-0.300748	-0.300748	-0.300748	-0.140099	-0.541723	-0.381073	-0.381073	-0.461398	-0.622047	-0.622047	-0.381073	-0.381073	-0.300748	-0.541723	-0.381073	-0.541723	-0.622047	-0.541723	-0.300748	-0.220424	-0.220424	-0.381073	-0.220424	0.100875	-0.140099	-0.461398	-0.541723	-0.140099	-0.140099	-0.140099
CDH16010_20161104_PA10_25B	F		L	0.168818	0.479446	0.401789	0.246475	0.401789	0.0135047	0.246475	0.168818	0.634759	-0.064152	0.168818	0.324132	0.479446	0.246475	0.0135047	0.479446	-0.141809	-0.219466	-0.297122	-0.141809	0.246475	0.0135047	0.324132	0.0911615	0.246475	0.479446	0.0911615	0.0911615	-0.141809	0.246475	0.479446	0.324132	0.479446	0.168818	0.557102	0.634759	1.1007	0.790073	0.790073	0.246475
CDH16010_20161104_PA10_25C	F		R	-0.312895	-0.312895	-0.312895	-0.465575	-0.312895	-0.236555	-0.236555	-0.160214	-0.389235	-0.00753378	-0.160214	0.145147	-0.312895	-0.00753378	0.145147	-0.160214	-0.00753378	-0.160214	-0.00753378	-0.312895	-0.541916	-0.0838741	-0.00753378	-0.236555	-0.312895	-0.0838741	-0.389235	-0.0838741	0.297827	0.221487	0.526848	0.450508	0.297827	0.90855	0.832209	0.832209	0.450508	0.374168	0.374168	0.603188
CDH16010_20161104_PA10_25D	F		R	-0.531595	-0.443163	-0.443163	-0.531595	-0.531595	-0.354731	-0.443163	-0.443163	-0.531595	-0.531595	-0.531595	-0.531595	-0.531595	-0.443163	-0.443163	-0.531595	-0.531595	-0.531595	-0.531595	-0.443163	-0.443163	-0.531595	-0.531595	-0.531595	-0.531595	-0.443163	-0.531595	-0.531595	-0.531595	-0.531595	-0.531595	-0.531595	-0.531595	-0.531595	-0.443163	-0.531595	-0.443163	-0.266299	-0.443163	-0.443163
CDH16010_20161104_PA10_27A	F	X	R	0.285144	0.552374	1.08683	0.712711	0.712711	1.08683	0.445482	1.24717	0.552374	0.231698	0.659265	0.819603	0.712711	0.33859	0.605819	0.392036	0.445482	0.552374	0.445482	0.33859	-0.0889773	-0.195869	-0.409653	-0.142423	-0.0889773	0.285144	-0.0889773	0.0713605	-0.0355314	-0.0355314	-0.249315	0.231698	0.0179146	0.445482	-0.0889773	0.552374	0.605819	0.712711	0.926495	0.498928
CDH16010_20161104_PA10_27B	F	X	R	0.784359	0.532021	0.0778133	0.178748	0.0778133	0.0778133	0.431086	0.178748	0.532021	-0.0231218	0.178748	0.481554	0.229216	0.784359	0.178748	0.481554	0.683424	0.733891	0.582489	0.0778133	0.128281	0.0273458	-0.224992	-0.124057	0.0273458	-0.0231218	-0.174524	0.279683	0.632956	0.431086	0.229216	0.330151	0.178748	-0.0231218	-0.0735893	-0.578265	0.229216	0.128281	-0.174524	-0.124057
CDH16010_20161104_PA10_29A	F	X	R	-0.401332	-0.535201	-0.133592	-0.468266	-0.468266	-0.401332	-0.267462	-0.535201	-0.535201	-0.267462	-0.535201	-0.267462	-0.401332	-0.468266	-0.133592	-0.267462	-0.200527	0.268017	0.000277462	0.0672123	0.201082	0.000277462	0.0672123	-0.200527	-0.468266	-0.267462	-0.334397	-0.535201	0.000277462	-0.401332	-0.602136	-0.468266	-0.602136	-0.401332	-0.267462	-0.669071	-0.602136	-0.0666574	-0.334397	-0.133592
CDH16010_20161104_PA10_29B	F		R	-0.181025	-0.274131	-0.274131	-0.274131	-0.367238	0.00518715	-0.274131	-0.274131	-0.274131	-0.367238	-0.274131	-0.087919	-0.367238	-0.181025	-0.274131	-0.274131	0.1914	-0.087919	-0.087919	0.00518715	-0.181025	0.00518715	-0.181025	0.00518715	-0.087919	-0.181025	-0.181025	0.00518715	-0.181025	-0.274131	0.0982933	-0.274131	-0.274131	-0.274131	-0.274131	-0.181025	-0.367238	-0.274131	-0.181025	-0.274131
CDH16010_20161104_PA10_29C	F	X	R	0.00731897	0.230696	-0.327746	-0.216058	0.00731897	0.00731897	-0.104369	-0.104369	0.230696	-0.327746	-0.104369	0.119007	0.119007	-0.216058	-0.104369	-0.104369	0.454072	0.56576	0.00731897	0.119007	0.119007	-0.104369	0.119007	0.454072	0.342384	-0.327746	0.00731897	0.119007	0.00731897	0.00731897	-0.104369	0.00731897	0.454072	0.119007	-0.104369	-0.104369	0.342384	0.00731897	-0.104369	-0.216058
CDH16019_20161109_PA10_01A	M		R	0.0123	0.237442	0.312489	0.124871	0.162394	0.199918	0.274965	0.612678	0.387536	0.500107	0.42506	0.462583	0.53763	0.500107	0.612678	0.462583	0.162394	0.162394	0.237442	0.312489	0.162394	0.0498236	-0.0252236	0.462583	0.162394	-0.0627471	-0.175318	-0.362936	-0.250365	-0.40046	-0.362936	-0.475507	-0.212842	-0.137794	-0.212842	-0.175318	-0.0252236	-0.175318	-0.175318	-0.0252236
CDH16019_20161109_PA10_03A	M	X	L	-0.150074	-0.35833	-0.35833	-0.35833	-0.275027	-0.233376	-0.316678	-0.441632	-0.399981	-0.316678	-0.233376	-0.275027	-0.316678	-0.0251199	0.0581825	0.224787	0.0998338	-0.108422	-0.150074	-0.150074	-0.233376	-0.150074	-0.275027	-0.275027	-0.150074	-0.0667711	-0.108422	-0.316678	-0.35833	-0.441632	-0.275027	-0.399981	-0.399981	-0.233376	-0.35833	-0.35833	-0.275027	-0.275027	-0.316678	-0.108422
CDH16019_20161109_PA10_05A	M	X	R	0.81614	0.681858	0.81614	0.493863	0.73557	0.869852	0.547576	1.05785	1.48755	0.708714	1.03099	0.869852	0.81614	0.279011	0.305868	0.171586	-0.204404	-0.0701218	-0.311829	-0.0701218	-0.284973	-0.258117	-0.392399	0.0104474	-0.258117	-0.0701218	0.198442	0.359581	0.359581	-0.016409	-0.177547	0.386437	0.171586	0.0373038	0.520719	0.44015	1.21899	1.24584	1.7024	1.56812
CDH16019_20161109_PA10_09A	M	X	R	-0.202166	0.169259	0.0949742	0.0949742	-0.202166	-0.202166	0.0206892	0.317829	-0.276451	-0.276451	-0.350736	0.169259	0.0949742	0.0949742	0.317829	-0.127881	0.0949742	0.0949742	-0.202166	-0.276451	0.0206892	0.0949742	-0.202166	-0.350736	0.243544	-0.0535957	-0.0535957	-0.0535957	-0.127881	-0.350736	-0.350736	-0.127881	-0.127881	-0.127881	-0.202166	0.0949742	0.169259	-0.0535957	0.169259	-0.0535957
CDH16019_20161109_PA10_17A	M		R	0.588411	0.227369	0.691565	0.536833	0.227369	1.31049	0.691565	0.691565	0.639988	0.743143	0.588411	0.382101	0.536833	0.330524	-0.0305172	0.175792	0.0726374	0.330524	0.227369	-0.0305172	0.278947	-0.0305172	0.227369	0.227369	0.433679	0.433679	0.382101	-0.185249	-0.0305172	-0.133672	-0.0305172	-0.185249	-0.133672	-0.0305172	0.0210601	0.124215	0.588411	0.691565	1.15576	0.639988
CDH16019_20161109_PA10_21A	M		R	0.0228693	-0.23604	-0.23604	0.0228693	0.152324	0.152324	0.0228693	0.152324	-0.106585	-0.23604	0.0228693	-0.106585	0.152324	0.411234	-0.23604	-0.106585	-0.106585	-0.23604	0.281779	0.0228693	-0.23604	0.152324	0.152324	-0.106585	0.0228693	0.152324	0.0228693	0.281779	0.0228693	-0.106585	-0.23604	-0.106585	-0.23604	-0.23604	-0.23604	-0.106585	0.0228693	-0.23604	-0.23604	-0.106585
EMR17002_20170707_PA10_01A	F	X	L	-0.480537	1.4093	-0.480537	-0.480537	-0.480537	-0.480537	-0.480537	1.4093	-0.480537	-0.480537	-0.480537	-0.480537	1.4093	-0.480537	-0.480537	-0.480537	1.4093	-0.480537	1.4093	-0.480537	-0.480537	1.4093	1.4093	-0.480537	3.29914	-0.480537	-0.480537	-0.480537	1.4093	-0.480537	1.4093	1.4093	-0.480537	-0.480537	-0.480537	-0.480537	-0.480537	1.4093	-0.480537	-0.480537
EMR17002_20170707_PA10_03A	F		L	-0.356346	-0.356346	5.20714	-0.356346	-0.356346	-0.356346	-0.356346	-0.356346	-0.356346	-0.356346	-0.356346	-0.356346	-0.356346	-0.356346	-0.356346	-0.356346	-0.356346	-0.356346	-0.356346	5.20714	-0.356346	-0.356346	-0.356346	-0.356346	-0.356346	-0.356346	2.42539	-0.356346	-0.356346	-0.356346	2.42539	-0.356346	2.42539	-0.356346	-0.356346	-0.356346	-0.356346	-0.356346	-0.356346	-0.356346
EMR17002_20170707_PA10_05A	F	X	L	0.676032	0.676032	0.676032	1.97059	0.676032	1.97059	0.676032	1.97059	0.676032	0.676032	1.97059	0.676032	0.676032	0.676032	-0.618521	0.676032	0.676032	-0.618521	-0.618521	-0.618521	-0.618521	-0.618521	-0.618521	-0.618521	-0.618521	-0.618521	-0.618521	-0.618521	-0.618521	0.676032	0.676032	-0.618521	1.97059	0.676032	0.676032	1.97059	0.676032	1.97059	0.676032	4.55969
EMR17002_20170707_PA10_07A	F		L	-0.771299	-0.771299	-0.771299	-0.771299	-0.154607	-0.771299	-0.771299	-0.771299	-0.771299	-0.771299	-0.154607	-0.771299	1.07878	0.462085	-0.154607	-0.154607	-0.154607	1.69547	-0.771299	0.462085	1.07878	-0.154607	0.462085	-0.154607	0.462085	-0.154607	2.92885	3.54554	0.462085	0.462085	-0.154607	-0.771299	-0.154607	-0.154607	-0.154607	-0.771299	-0.771299	-0.771299	-0.771299	-0.771299
EMR17002_20170707_PA10_09A	F		L	-0.390595	3.63871	1.62406	-0.390595	1.62406	-0.390595	-0.390595	-0.390595	-0.390595	-0.390595	-0.390595	-0.390595	-0.390595	-0.390595	-0.390595	-0.390595	-0.390595	-0.390595	-0.390595	-0.390595	-0.390595	-0.390595	-0.390595	-0.390595	-0.390595	-0.390595	-0.390595	-0.390595	-0.390595	-0.390595	-0.390595	-0.390595	-0.390595	-0.390595	-0.390595	-0.390595	-0.390595	-0.390595	-0.390595	-0.390595
EMR17002_20170707_PA10_09B	F		L	-0.505624	-0.505624	-0.505624	-0.505624	-0.505624	-0.505624	-0.505624	-0.505624	-0.505624	-0.505624	-0.505624	-0.505624	-0.505624	-0.505624	-0.505624	-0.505624	-0.505624	-0.505624	-0.505624	1.58533	-0.505624	-0.505624	-0.505624	-0.505624	-0.505624	-0.505624	-0.505624	-0.505624	1.58533	-0.505624	-0.505624	-0.505624	-0.505624	1.58533	-0.505624	-0.505624	1.58533	-0.505624	-0.505624	-0.505624
EMR17002_20170707_PA10_11A	F		L	0.419375	0.419375	-0.753598	0.419375	-0.753598	-0.753598	0.419375	-0.753598	-0.753598	1.59235	-0.753598	0.419375	-0.753598	-0.753598	0.419375	-0.753598	-0.753598	0.419375	0.419375	-0.753598	0.419375	-0.753598	-0.753598	-0.753598	-0.753598	-0.753598	-0.753598	-0.753598	-0.753598	-0.753598	-0.753598	-0.753598	-0.753598	-0.753598	-0.753598	-0.753598	-0.753598	-0.753598	-0.753598	-0.753598
EMR17002_20170707_PA10_13A	F		L	-0.311281	-0.311281	2.78566	2.78566	-0.311281	-0.311281	-0.311281	-0.311281	-0.311281	2.78566	-0.311281	2.78566	-0.311281	-0.311281	-0.311281	2.78566	2.78566	-0.311281	5.88259	-0.311281	-0.311281	-0.311281	-0.311281	-0.311281	-0.311281	2.78566	-0.311281	-0.311281	-0.311281	-0.311281	-0.311281	-0.311281	-0.311281	-0.311281	-0.311281	2.78566	-0.311281	-0.311281	-0.311281	-0.311281
EMR17002_20170707_PA10_19A	F		L	-0.419906	1.95479	1.95479	-0.419906	-0.419906	-0.419906	-0.419906	-0.419906	1.95479	-0.419906	4.32949	-0.419906	-0.419906	-0.419906	-0.419906	1.95479	-0.419906	-0.419906	-0.419906	-0.419906	-0.419906	-0.419906	1.95479	-0.419906	-0.419906	-0.419906	-0.419906	-0.419906	-0.419906	1.95479	1.95479	-0.419906	-0.419906	-0.419906	-0.419906	-0.419906	1.95479	-0.419906	-0.419906	4.32949
EMR17002_20170707_PA10_21A	F		L	-0.191267	-0.191267	-0.191267	-0.191267	-0.191267	-0.191267	-0.191267	-0.191267	-0.191267	-0.191267	-0.191267	-0.191267	-0.191267	-0.191267	-0.191267	-0.191267	-0.191267	-0.191267	-0.191267	5.01666	-0.191267	-0.191267	-0.191267	-0.191267	-0.191267	-0.191267	-0.191267	-0.191267	-0.191267	5.01666	-0.191267	-0.191267	-0.191267	-0.191267	-0.191267	-0.191267	-0.191267	-0.191267	-0.191267	-0.191267
EMR17002_20170707_PA10_23A	F		L	0.930052	-0.589053	2.44916	0.930052	-0.589053	-0.589053	-0.589053	-0.589053	0.930052	0.930052	0.930052	-0.589053	0.930052	0.930052	-0.589053	0.930052	-0.589053	3.96826	-0.589053	2.44916	0.930052	0.930052	2.44916	0.930052	0.930052	-0.589053	0.930052	0.930052	-0.589053	2.44916	-0.589053	-0.589053	-0.589053	-0.589053	-0.589053	-0.589053	-0.589053	-0.589053	-0.589053	0.930052
EMR17002_20170707_PA10_23B	F	X	L	-0.301984	2.52545	-0.301984	-0.301984	-0.301984	2.52545	2.52545	-0.301984	-0.301984	-0.301984	-0.301984	5.35288	-0.301984	-0.301984	-0.301984	-0.301984	2.52545	-0.301984	-0.301984	-0.301984	-0.301984	-0.301984	-0.301984	-0.301984	-0.301984	2.52545	-0.301984	-0.301984	-0.301984	-0.301984	-0.301984	-0.301984	-0.301984	-0.301984	-0.301984	-0.301984	-0.301984	-0.301984	-0.301984	-0.301984
EMR17002_20170707_PA10_27A	F		L	-0.167444	-0.167444	-0.167444	-0.167444	-0.167444	-0.167444	-0.167444	-0.167444	-0.167444	-0.167444	-0.167444	-0.167444	-0.167444	-0.167444	-0.167444	-0.167444	-0.167444	-0.167444	-0.167444	-0.167444	-0.167444	-0.167444	-0.167444	-0.167444	-0.167444	5.7894	-0.167444	-0.167444	-0.167444	-0.167444	-0.167444	-0.167444	-0.167444	-0.167444	-0.167444	-0.167444	-0.167444	-0.167444	-0.167444	-0.167444
EMR17002_20170707_PA10_31A	F	X	L	3.32177	-0.267619	-0.267619	3.32177	-0.267619	-0.267619	3.32177	-0.267619	-0.267619	-0.267619	-0.267619	-0.267619	-0.267619	3.32177	-0.267619	-0.267619	-0.267619	3.32177	-0.267619	-0.267619	-0.267619	-0.267619	-0.267619	-0.267619	-0.267619	-0.267619	-0.267619	-0.267619	3.32177	-0.267619	-0.267619	-0.267619	3.32177	-0.267619	-0.267619	-0.267619	-0.267619	-0.267619	-0.267619	-0.267619
EMR17002_20170707_PA10_31B	F			-0.222238	-0.222238	-0.222238	-0.222238	-0.222238	-0.222238	-0.222238	-0.222238	-0.222238	-0.222238	-0.222238	-0.222238	-0.222238	-0.222238	-0.222238	-0.222238	-0.222238	-0.222238	-0.222238	-0.222238	-0.222238	-0.222238	-0.222238	-0.222238	-0.222238	-0.222238	-0.222238	-0.222238	-0.222238	-0.222238	-0.222238	-0.222238	-0.222238	-0.222238	-0.222238	-0.222238	-0.222238	-0.222238	-0.222238	-0.222238
EMR17004_20170703_PA10_03A	F		R	-0.216291	-0.216291	-0.216291	-0.216291	-0.216291	-0.216291	-0.216291	-0.216291	-0.216291	-0.216291	-0.216291	-0.216291	-0.216291	-0.216291	-0.216291	-0.216291	-0.216291	-0.216291	-0.216291	-0.216291	-0.216291	-0.216291	0.719627	-0.216291	-0.216291	-0.216291	-0.216291	-0.216291	-0.216291	-0.216291	-0.216291	-0.216291	-0.216291	-0.216291	-0.216291	-0.216291	-0.216291	-0.216291	-0.216291	-0.216291
EMR17004_20170703_PA10_03B	F		L	-0.476398	-0.476398	-0.476398	-0.476398	-0.476398	-0.476398	-0.476398	-0.476398	-0.476398	0.997278	-0.476398	0.26044	0.26044	-0.476398	0.997278	-0.476398	-0.476398	1.73412	0.26044	0.26044	0.26044	0.26044	0.26044	-0.476398	-0.476398	0.26044	0.26044	-0.476398	0.26044	-0.476398	0.997278	0.26044	-0.476398	0.26044	-0.476398	0.997278	-0.476398	0.26044	0.26044	0.26044
EMR17004_20170703_PA10_11A	F		L	-0.254385	-0.254385	-0.254385	-0.254385	0.869003	-0.254385	-0.254385	-0.254385	-0.254385	-0.254385	-0.254385	-0.254385	-0.254385	0.869003	-0.254385	-0.254385	1.99239	-0.254385	-0.254385	0.869003	0.869003	0.869003	0.869003	0.869003	-0.254385	-0.254385	0.869003	1.99239	-0.254385	-0.254385	-0.254385	0.869003	0.869003	0.869003	0.869003	-0.254385	0.869003	-0.254385	-0.254385	-0.254385
EMR17004_20170703_PA10_11B	F		L	-0.639843	-0.639843	-0.639843	-0.639843	-0.1123	0.415243	0.415243	-0.1123	0.415243	0.942786	0.415243	-0.1123	0.415243	0.415243	-0.1123	-0.1123	-0.639843	-0.1123	-0.1123	-0.1123	-0.639843	-0.1123	-0.639843	0.415243	-0.1123	-0.1123	-0.1123	-0.1123	-0.1123	-0.639843	-0.639843	-0.639843	-0.1123	-0.1123	0.415243	-0.639843	-0.639843	-0.639843	0.415243	-0.1123
EMR17004_20170703_PA10_13A	F		L	-0.377439	0.425794	-0.377439	0.425794	-0.377439	1.22903	-0.377439	-0.377439	-0.377439	1.22903	1.22903	-0.377439	-0.377439	-0.377439	0.425794	0.425794	0.425794	-0.377439	-0.377439	-0.377439	0.425794	0.425794	0.425794	-0.377439	-0.377439	-0.377439	-0.377439	-0.377439	-0.377439	-0.377439	-0.377439	-0.377439	0.425794	-0.377439	-0.377439	-0.377439	-0.377439	-0.377439	-0.377439	-0.377439
EMR17004_20170703_PA10_17A	F	X	L	-0.466527	-0.466527	-0.466527	0.282178	0.282178	-0.466527	0.282178	1.03088	0.282178	1.03088	0.282178	1.03088	-0.466527	0.282178	-0.466527	1.77959	-0.466527	1.03088	-0.466527	1.77959	0.282178	0.282178	0.282178	0.282178	0.282178	-0.466527	-0.466527	-0.466527	-0.466527	1.03088	-0.466527	0.282178	0.282178	1.03088	-0.466527	1.03088	0.282178	1.03088	0.282178	0.282178
EMR17004_20170703_PA10_17B	F		L	-0.33553	1.42982	-0.33553	-0.33553	-0.33553	-0.33553	-0.33553	-0.33553	-0.33553	-0.33553	-0.33553	-0.33553	-0.33553	0.547147	0.547147	-0.33553	0.547147	0.547147	-0.33553	1.42982	0.547147	-0.33553	0.547147	-0.33553	0.547147	0.547147	-0.33553	-0.33553	0.547147	0.547147	0.547147	-0.33553	0.547147	1.42982	-0.33553	0.547147	-0.33553	-0.33553	-0.33553	-0.33553
EMR17006_20170717_PA10_01A	M	X	R	0.256591	0.0419314	0.256591	-0.172728	0.0419314	0.0419314	-0.172728	-0.172728	-0.172728	-0.172728	0.0419314	-0.172728	0.0419314	-0.172728	-0.172728	0.0419314	-0.172728	-0.172728	-0.172728	0.0419314	0.256591	-0.172728	0.47125	1.32989	0.0419314	0.47125	0.0419314	0.0419314	0.0419314	-0.172728	-0.172728	0.0419314	-0.172728	0.0419314	0.0419314	1.11523	0.0419314	0.0419314	0.0419314	-0.172728
EMR17006_20170717_PA10_03A	M		R	-0.357566	-0.444472	-0.444472	-0.444472	-0.444472	-0.444472	-0.444472	-0.444472	-0.444472	-0.444472	-0.444472	-0.357566	-0.444472	-0.357566	-0.444472	-0.444472	-0.444472	-0.444472	-0.444472	-0.444472	-0.444472	-0.444472	-0.444472	-0.444472	-0.444472	-0.444472	-0.444472	-0.444472	-0.444472	-0.357566	-0.357566	-0.444472	-0.444472	-0.357566	-0.357566	-0.357566	-0.444472	-0.444472	-0.357566	-0.444472
EMR17006_20170717_PA10_03B	M		R	-0.117822	-0.117822	-0.117822	-0.222761	-0.117822	-0.327701	-0.117822	-0.327701	0.196997	-0.117822	-0.117822	-0.327701	0.196997	-0.327701	-0.117822	0.301936	0.0920571	-0.0128824	-0.0128824	-0.0128824	-0.222761	-0.222761	0.0920571	0.0920571	-0.222761	-0.0128824	-0.327701	-0.327701	-0.222761	-0.117822	-0.117822	-0.0128824	-0.0128824	-0.117822	-0.222761	0.196997	0.0920571	-0.117822	0.301936	-0.117822
EMR17006_20170717_PA10_05A	M		L	-0.178086	-0.178086	-0.430926	0.0115436	-0.430926	-0.241296	-0.241296	-0.241296	-0.430926	-0.430926	-0.178086	-0.367716	-0.430926	-0.367716	-0.304506	-0.178086	-0.494136	-0.367716	-0.430926	-0.494136	-0.494136	-0.241296	-0.430926	-0.241296	-0.430926	-0.430926	-0.430926	-0.494136	-0.430926	-0.367716	0.0115436	-0.430926	-0.494136	-0.304506	-0.430926	-0.430926	-0.367716	-0.430926	-0.178086	-0.367716
EMR17006_20170717_PA10_07A	M	X	R	-0.190501	0.0015087	0.0015087	0.0015087	-0.190501	-0.190501	-0.190501	-0.190501	-0.190501	-0.190501	-0.190501	-0.190501	0.193519	-0.190501	0.193519	-0.190501	-0.190501	0.0015087	0.385529	-0.190501	0.385529	0.193519	0.577539	0.577539	-0.190501	0.0015087	0.193519	0.577539	0.193519	0.577539	0.385529	-0.190501	0.961559	0.385529	0.193519	0.385529	0.0015087	0.193519	0.193519	-0.190501
EMR17006_20170717_PA10_09A	M	X	R	1.56436	1.10116	1.02396	0.715163	1.10116	0.637963	0.560763	0.715163	1.02396	0.869563	0.560763	0.406362	0.792363	0.406362	0.406362	0.174762	0.792363	0.560763	0.174762	0.560763	0.946763	0.792363	1.02396	1.40996	1.56436	1.71876	1.71876	1.71876	1.64156	1.64156	2.25917	2.41357	3.10837	2.56797	2.10477	1.87317	1.87317	1.02396	1.33276	1.02396
EMR17006_20170717_PA10_09B	M	X	R	0.423224	0.423224	0.28512	0.69943	0.561327	0.00891378	-0.267293	0.00891378	0.423224	0.147017	0.147017	0.423224	-0.12919	-0.12919	-0.12919	-0.267293	0.00891378	0.00891378	0.28512	0.00891378	0.00891378	-0.267293	0.423224	0.561327	0.28512	0.28512	0.423224	0.423224	0.147017	0.837534	0.147017	0.423224	2.08046	0.69943	0.975637	0.975637	1.66615	0.561327	0.423224	1.25184
EMR17006_20170717_PA10_11A	M		R	-0.069231	0.0500744	0.16938	0.527296	-0.069231	-0.069231	-0.188536	-0.188536	-0.188536	-0.188536	-0.069231	-0.069231	-0.069231	0.0500744	0.527296	0.16938	0.646601	0.407991	-0.069231	0.0500744	-0.188536	-0.188536	-0.069231	-0.188536	-0.188536	-0.188536	-0.188536	-0.188536	0.0500744	-0.069231	-0.188536	-0.188536	0.16938	0.16938	-0.069231	-0.069231	-0.069231	0.0500744	-0.188536	-0.069231
EMR17006_20170717_PA10_11B	M		R	-0.51451	-0.575765	-0.575765	-0.575765	-0.575765	-0.575765	-0.51451	-0.51451	-0.51451	-0.51451	-0.575765	-0.575765	-0.575765	-0.637019	-0.575765	-0.637019	-0.575765	-0.575765	-0.575765	-0.637019	-0.575765	-0.575765	-0.51451	-0.575765	-0.637019	-0.51451	-0.637019	-0.575765	-0.637019	-0.453256	-0.637019	-0.637019	-0.637019	-0.637019	-0.575765	-0.637019	-0.51451	-0.51451	-0.392002	-0.575765
EMR17006_20170717_PA10_11C	M	X	R	-0.178673	-0.178673	-0.239663	-0.300653	-0.117682	0.248258	0.065288	-0.117682	-0.178673	-0.483623	-0.483623	-0.300653	0.065288	0.126278	-0.300653	0.126278	0.370239	0.73618	1.10212	0.91915	0.614199	0.187268	0.187268	-0.239663	-0.300653	-0.300653	-0.239663	-0.300653	-0.300653	-0.483623	-0.239663	-0.361643	-0.361643	-0.422633	-0.117682	-0.239663	-0.422633	-0.300653	-0.422633	-0.422633
EMR17006_20170717_PA10_11D	M	X	R	0.370423	0.336042	0.404804	0.507947	0.576709	0.576709	0.473566	0.336042	0.645471	0.92052	0.954901	1.505	1.43624	1.74566	1.74566	2.05509	1.88319	2.84586	2.70833	1.84881	1.71128	1.53938	1.36747	1.05804	0.301661	-0.00776846	-0.145293	0.0953747	0.164137	0.645471	0.164137	0.336042	-0.110912	-0.110912	0.0266126	-0.351579	-0.317198	-0.214055	-0.282817	-0.214055
EMR17006_20170717_PA10_13A	M		R	0.0789799	0.148552	0.774703	0.70513	0.844275	0.635558	0.635558	1.26171	0.913847	0.496413	0.218124	-0.0601646	0.287697	-0.0601646	-0.0601646	-0.129737	-0.199309	-0.129737	-0.268881	-0.199309	-0.268881	-0.0601646	0.148552	0.0789799	-0.129737	-0.0601646	-0.268881	-0.338454	-0.338454	-0.338454	-0.199309	-0.268881	-0.268881	0.148552	0.218124	0.70513	0.774703	0.565986	1.12256	0.844275
EMR17006_20170717_PA10_15A	M	X	R	0.258162	0.107573	0.649694	0.228045	0.167809	-0.0731336	0.107573	0.197927	0.228045	0.649694	0.28828	0.950872	0.438869	0.679812	0.98099	0.619576	0.619576	0.740047	0.830401	0.529223	0.438869	0.0172199	0.167809	0.318398	0.258162	0.468987	0.468987	1.07134	0.70993	1.04123	1.3424	1.49299	1.70382	0.70993	0.378634	0.107573	-0.0430158	-0.0731336	0.137691	0.28828
EMR17006_20170717_PA10_15B	M	X	R	0.0272188	0.298973	0.190271	0.13592	-0.0814827	-0.190184	-0.244535	-0.353237	-0.0814827	-0.190184	-0.353237	-0.516289	-0.298886	-0.0814827	-0.407587	-0.298886	-0.461938	-0.190184	-0.0271319	-0.461938	-0.135834	-0.407587	-0.407587	-0.353237	-0.461938	-0.298886	-0.57064	-0.353237	-0.135834	0.353324	0.0815696	0.733779	0.298973	0.13592	-0.353237	0.0272188	-0.190184	-0.244535	-0.461938	-0.353237
EMR17006_20170717_PA10_15C	M	X	L	-0.109036	-0.109036	-0.268743	-0.30867	-0.268743	-0.109036	-0.428451	-0.548232	-0.348597	-0.668012	-0.428451	-0.588158	-0.628085	-0.628085	-0.707939	-0.18889	-0.468378	-0.508305	-0.428451	-0.588158	-0.707939	-0.628085	-0.628085	-0.468378	-0.388524	-0.30867	0.489867	-0.0291821	0.210379	-0.109036	-0.069109	-0.548232	-0.707939	-0.707939	-0.548232	-0.388524	-0.148963	-0.468378	-0.668012	-0.548232
EMR17006_20170717_PA10_17A	M	X	R	-0.157723	0.00793823	-0.323385	-0.323385	0.1736	-0.157723	0.422092	0.00793823	0.504923	0.256431	0.00793823	-0.0748926	0.00793823	-0.323385	-0.323385	-0.157723	0.090769	-0.0748926	-0.157723	0.339261	0.00793823	1.00191	0.504923	0.339261	0.422092	0.504923	0.256431	0.256431	0.670585	0.753415	0.919077	0.670585	0.090769	0.090769	0.00793823	0.00793823	0.504923	0.090769	-0.0748926	0.504923
EMR17006_20170717_PA10_17B	M		R	0.0996923	-0.230567	0.0996923	0.0996923	0.429952	-0.0654374	-0.0654374	-0.230567	-0.0654374	-0.0654374	-0.0654374	0.595081	-0.230567	-0.0654374	0.0996923	-0.230567	0.0996923	-0.0654374	-0.230567	-0.0654374	0.760211	0.429952	0.0996923	0.0996923	-0.0654374	-0.0654374	-0.0654374	0.429952	-0.0654374	0.0996923	-0.0654374	-0.0654374	-0.0654374	0.0996923	0.0996923	-0.230567	0.429952	-0.230567	0.0996923	-0.230567
EMR17006_20170717_PA10_19A	M	X	R	-0.410408	-0.559484	-0.373139	-0.33587	-0.484946	-0.522215	-0.522215	-0.522215	-0.559484	-0.522215	-0.559484	-0.484946	-0.559484	-0.559484	-0.559484	-0.559484	-0.559484	-0.522215	-0.522215	-0.559484	-0.559484	-0.559484	-0.447677	-0.410408	-0.559484	-0.447677	-0.410408	-0.484946	-0.447677	-0.373139	-0.484946	-0.373139	-0.373139	-0.33587	-0.373139	-0.33587	-0.484946	-0.484946	-0.410408	-0.447677
EMR17006_20170717_PA10_19B	M	X	R	0.263743	0.263743	0.102035	0.425451	0.748868	0.102035	0.748868	1.07228	0.748868	1.07228	0.748868	0.58716	0.748868	0.58716	0.425451	0.425451	0.748868	0.748868	0.425451	0.425451	0.263743	0.425451	1.07228	0.910576	0.748868	0.58716	0.58716	0.748868	-0.0596732	0.425451	0.102035	0.263743	0.263743	0.102035	0.263743	-0.0596732	0.425451	0.263743	0.425451	0.748868
EMR17006_20170717_PA10_23A	M		R	-0.219723	-0.402644	-0.402644	-0.622151	-0.439229	-0.256307	-0.658735	-0.622151	-0.658735	-0.695319	-0.658735	-0.36606	-0.548982	-0.512398	-0.585566	-0.439229	-0.475813	-0.658735	-0.402644	-0.548982	-0.402644	-0.439229	-0.292891	-0.256307	-0.585566	-0.219723	-0.219723	-0.183138	0.0729521	-0.622151	-0.402644	-0.256307	-0.292891	-0.36606	-0.219723	-0.0733853	-0.658735	-0.512398	-0.292891	-0.658735
EMR17006_20170717_PA10_25A	M	X	L	0.498736	0.0673908	0.390899	0.498736	0.498736	0.930081	0.930081	0.930081	0.714408	1.25359	1.36143	1.79277	1.5771	2.11628	1.90061	1.5771	1.25359	2.33195	1.68493	0.714408	0.930081	0.0673908	0.0673908	-0.0404454	0.0673908	-0.256118	-0.256118	-0.256118	-0.148282	-0.256118	-0.148282	0.0673908	-0.0404454	-0.256118	-0.148282	0.0673908	-0.148282	-0.148282	-0.148282	-0.0404454
EMR17006_20170717_PA10_27A	M	X	L	-0.417845	-0.350355	-0.451591	-0.3841	-0.3841	-0.249119	-0.485336	-0.485336	-0.755299	-0.721554	-0.586572	-0.721554	-0.620317	-0.586572	-0.789044	-0.789044	-0.721554	-0.586572	-0.721554	-0.586572	-0.687808	-0.552827	-0.789044	-0.552827	-0.586572	-0.586572	-0.755299	-0.856535	-0.89028	-0.89028	-0.957771	-0.957771	-0.721554	-0.654063	-0.687808	-0.687808	-0.485336	-0.654063	-0.721554	-0.519081
EMR17006_20170717_PA10_27B	M		R	0.0240018	-0.135875	-0.135875	-0.135875	0.183878	-0.135875	-0.135875	0.0240018	-0.135875	-0.135875	-0.135875	0.0240018	-0.135875	-0.135875	-0.135875	-0.135875	0.0240018	-0.135875	-0.135875	-0.135875	0.0240018	0.0240018	-0.135875	-0.135875	0.0240018	0.183878	-0.135875	-0.135875	-0.135875	-0.135875	-0.135875	-0.135875	-0.135875	-0.135875	-0.135875	0.0240018	-0.135875	-0.135875	-0.135875	0.0240018
EMR17007_20170622_PA10_01A	M	X	R	0.341189	1.1102	0.518653	-0.191203	0.22288	0.459498	0.22288	0.10457	0.163725	0.518653	0.696116	0.400343	0.341189	0.282034	0.696116	0.0454157	0.282034	-0.0728935	0.459498	0.10457	0.341189	0.163725	0.10457	0.814426	0.814426	0.459498	0.0454157	0.0454157	-0.0728935	-0.132048	-0.0728935	-0.191203	-0.309512	-0.427821	-0.250357	-0.191203	0.459498	0.282034	-0.0728935	0.341189
EMR17007_20170622_PA10_03A	M	X	L	-0.423995	-0.323234	-0.323234	-0.0713316	-0.373614	-0.373614	-0.423995	-0.172092	-0.272853	-0.121712	-0.222473	-0.524755	-0.524755	-0.323234	-0.625516	-0.323234	-0.373614	-0.474375	-0.524755	-0.222473	-0.625516	-0.423995	-0.575136	-0.474375	-0.776658	-0.625516	-0.323234	-0.524755	-0.474375	-0.272853	-0.172092	-0.0209511	0.0798097	-0.474375	-0.0209511	-0.121712	-0.323234	-0.323234	-0.272853	-0.0713316
EMR17007_20170622_PA10_03B	M	X	L	0.23977	-0.100601	0.0695843	-0.100601	-0.35588	-0.0155085	0.0695843	0.495048	0.154677	-0.185694	0.154677	-0.0155085	-0.100601	0.23977	0.154677	0.0695843	0.0695843	0.154677	0.154677	-0.270787	0.154677	-0.185694	-0.185694	-0.270787	-0.0155085	-0.526065	-0.0155085	-0.185694	-0.526065	-0.526065	-0.35588	-0.526065	-0.35588	-0.185694	-0.270787	-0.100601	-0.185694	-0.0155085	-0.0155085	0.0695843
EMR17007_20170622_PA10_05A	M		L	-0.0335951	-0.405513	-0.219554	-0.0335951	-0.126574	-0.312533	-0.126574	-0.126574	-0.219554	-0.0335951	-0.0335951	-0.219554	-0.312533	-0.405513	-0.405513	-0.312533	-0.126574	0.152364	-0.126574	-0.219554	-0.126574	-0.219554	-0.0335951	0.0593843	-0.0335951	-0.405513	-0.219554	-0.0335951	0.152364	-0.312533	-0.0335951	0.338322	0.0593843	0.338322	-0.126574	-0.219554	-0.219554	0.245343	0.431302	0.245343
EMR17007_20170622_PA10_05B	M		L	0.702581	-0.0112115	-0.0112115	-0.0112115	0.226719	-0.130177	-0.130177	-0.249142	0.345685	0.226719	-0.249142	-0.249142	-0.130177	0.107754	0.345685	-0.130177	0.345685	-0.0112115	0.702581	-0.0112115	0.107754	0.107754	-0.130177	-0.130177	-0.368108	0.226719	-0.0112115	-0.0112115	0.107754	-0.0112115	0.226719	0.107754	-0.368108	0.107754	-0.130177	-0.130177	-0.130177	0.226719	-0.0112115	-0.130177
EMR17007_20170622_PA10_07A	M		R	0.234763	0.2798	0.45995	0.550024	0.504987	1.0004	1.45077	0.95536	1.13551	1.54085	1.0004	1.09047	0.45995	0.414912	0.414912	0.504987	0.369875	0.00957625	-0.0804984	-0.21561	-0.260648	-0.440797	-0.260648	-0.350722	-0.170573	-0.0354611	-0.125536	-0.0804984	-0.21561	-0.39576	-0.665984	-0.39576	-0.170573	-0.170573	0.504987	0.685136	1.40573	0.45995	1.0004	0.595062
EMR17007_20170622_PA10_09A	M	X	R	0.109748	0.0331426	0.569381	0.301262	0.0714453	0.339564	0.339564	0.0331426	-0.349884	-0.120068	0.262959	0.0331426	0.0714453	0.301262	0.454472	-0.0434628	0.41617	-0.196674	-0.158371	-0.196674	-0.349884	0.0331426	0.0714453	0.492775	0.301262	0.531078	1.14392	0.760894	0.722591	0.377867	0.262959	0.262959	0.262959	0.492775	-0.196674	-0.00516006	0.301262	-0.00516006	0.301262	0.0331426
EMR17007_20170622_PA10_09B	M	X	R	0.540405	0.445408	0.445408	0.635403	0.0654184	0.540405	-0.124576	-0.172075	0.160416	0.207914	-0.124576	-0.0770777	0.540405	-0.124576	-0.0770777	0.160416	0.540405	0.540405	0.587904	0.207914	0.255413	0.587904	0.492907	0.587904	0.160416	-0.124576	-0.029579	-0.267072	0.0654184	-0.124576	0.112917	-0.219574	-0.124576	-0.029579	0.0654184	-0.219574	-0.219574	-0.219574	-0.172075	-0.0770777
EMR17007_20170622_PA10_11A	M		R	-0.20001	0.327944	0.403366	-0.0491662	0.1771	0.1771	-0.0491662	0.101678	0.1771	0.1771	0.0262558	0.0262558	-0.0491662	0.327944	-0.124588	-0.350854	-0.275432	-0.20001	-0.124588	-0.0491662	-0.20001	-0.20001	0.1771	0.1771	0.0262558	0.252522	0.1771	0.101678	0.1771	0.101678	0.0262558	-0.0491662	-0.20001	0.629632	-0.350854	0.1771	0.403366	0.1771	0.327944	0.327944
EMR17007_20170622_PA10_11B	M	X	R	-0.155456	-0.0394652	0.0185301	-0.0394652	0.0185301	0.134521	0.656478	0.250511	0.656478	0.540487	1.17844	0.424497	0.366502	0.366502	0.0765253	-0.0394652	-0.0394652	-0.155456	-0.0394652	0.0185301	-0.0394652	-0.271446	0.250511	0.540487	0.308506	0.482492	0.540487	1.35242	0.772468	-0.0394652	0.424497	-0.213451	-0.0394652	-0.0394652	0.250511	-0.213451	0.540487	0.0765253	0.134521	0.830464
EMR17007_20170622_PA10_17A	M		L	0.070483	0.170251	0.070483	-0.328587	0.070483	0.070483	-0.129052	-0.22882	-0.22882	0.070483	0.469553	0.170251	0.170251	0.469553	0.070483	-0.0292845	-0.22882	-0.22882	-0.22882	-0.22882	-0.328587	-0.129052	-0.328587	-0.0292845	-0.0292845	0.070483	-0.0292845	-0.22882	-0.0292845	-0.0292845	-0.22882	0.170251	0.070483	0.968391	0.868623	0.170251	0.369786	0.369786	0.170251	0.070483
EMR17007_20170622_PA10_17B	M		R	-0.00736437	0.112687	-0.00736437	0.112687	-0.00736437	-0.00736437	-0.00736437	0.352788	0.472839	-0.00736437	0.112687	-0.00736437	0.112687	-0.127415	-0.127415	0.232738	0.472839	-0.247466	0.472839	-0.127415	-0.127415	-0.127415	-0.00736437	0.112687	0.352788	0.59289	-0.247466	-0.247466	-0.00736437	-0.00736437	-0.00736437	-0.247466	-0.127415	-0.127415	0.112687	0.712941	0.472839	-0.247466	0.59289	0.112687
EMR17007_20170622_PA10_23A	M	X	R	0.320226	-0.0390924	0.1569	-0.0390924	0.0589036	-0.365746	-0.202419	-0.0390924	-0.169754	0.254896	-0.0390924	-0.33308	0.0262383	-0.235084	-0.0390924	-0.00642706	-0.137088	0.254896	0.385557	0.0589036	-0.0390924	0.287561	-0.104423	0.124234	0.777541	0.450888	0.842872	0.777541	0.352892	-0.169754	-0.0717577	0.0262383	0.516218	0.320226	-0.0717577	-0.202419	-0.496407	-0.235084	-0.235084	-0.0717577
EMR17007_20170622_PA10_23B	M	X	R	0.300288	-0.0120157	0.0920856	0.196187	0.300288	-0.116117	-0.324319	-0.116117	-0.220218	-0.116117	-0.220218	-0.324319	-0.116117	-0.116117	0.196187	-0.0120157	0.0920856	0.50849	-0.116117	0.404389	0.196187	0.404389	0.404389	0.196187	0.196187	0.716693	0.612592	0.404389	0.0920856	-0.220218	-0.220218	0.300288	0.196187	-0.220218	-0.324319	0.196187	-0.0120157	-0.116117	-0.220218	0.0920856
EMR17007_20170622_PA10_27A	M	X	L	0.546406	0.403415	0.045938	0.188929	-0.0970528	-0.168548	0.117433	0.188929	0.117433	-0.0970528	0.045938	-0.168548	0.045938	-0.168548	0.260424	-0.168548	-0.0970528	-0.0970528	-0.0970528	0.045938	0.260424	0.33192	-0.0255574	-0.0970528	0.403415	-0.0970528	-0.168548	-0.383034	-0.0970528	-0.311539	-0.311539	-0.240044	-0.168548	-0.311539	-0.168548	0.474911	0.045938	0.33192	0.045938	0.045938
EMR17007_20170622_PA10_27B	M	X	R	-0.0569261	0.276768	0.00981267	0.00981267	0.210029	0.743939	0.877417	1.27785	0.476984	0.6772	0.810678	0.810678	0.343506	0.610462	0.543723	0.476984	0.6772	0.410245	0.00981267	0.210029	0.0765514	0.6772	0.343506	0.810678	0.476984	0.210029	0.743939	0.877417	0.210029	0.276768	0.0765514	-0.190404	-0.190404	-0.190404	-0.0569261	-0.123665	-0.123665	0.0765514	0.6772	0.543723
EMR17007_20170622_PA10_27C	M	X	R	0.0800475	0.476136	0.476136	0.278092	0.278092	-0.117997	0.17907	-0.117997	0.575158	-0.0189745	-0.117997	-0.117997	-0.117997	0.17907	-0.0189745	-0.0189745	-0.0189745	-0.117997	0.0800475	0.17907	0.17907	0.377114	0.67418	0.872224	0.377114	0.278092	0.0800475	-0.217019	-0.117997	-0.0189745	0.0800475	0.0800475	0.278092	0.278092	0.0800475	-0.0189745	0.17907	-0.0189745	-0.117997	-0.0189745
EMR17008_20170718_PA10_01A	M		R	0.192585	0.0195595	0.62515	0.0195595	0.192585	0.452124	0.106072	0.452124	0.452124	0.538637	0.0195595	0.365611	0.538637	0.0195595	0.538637	0.106072	0.365611	0.711663	0.365611	0.279098	0.538637	0.192585	0.192585	0.452124	0.452124	0.365611	-0.0669534	-0.239979	-0.413005	-0.0669534	0.106072	0.365611	-0.0669534	0.192585	0.279098	-0.0669534	-0.326492	-0.239979	-0.499518	0.106072
EMR17008_20170718_PA10_03A	M	X	R	0.610632	0.277403	0.610632	0.527325	0.277403	0.527325	0.36071	0.444017	0.110788	1.02717	0.444017	0.860554	0.777247	0.943861	1.02717	1.27709	1.52701	1.19378	1.61032	1.19378	1.02717	1.69363	1.44371	1.61032	1.02717	0.444017	0.943861	-0.222442	0.110788	-0.305749	0.36071	-0.0558268	0.36071	0.860554	0.610632	0.693939	0.610632	0.444017	0.277403	0.527325
EMR17008_20170718_PA10_05A	M		R	0.305613	-0.124376	0.41311	-0.231873	0.305613	-0.0168785	0.843098	0.198116	-0.0168785	0.198116	0.305613	0.198116	0.0906186	-0.0168785	0.0906186	0.0906186	-0.0168785	-0.33937	-0.124376	-0.0168785	-0.124376	0.198116	-0.0168785	-0.33937	0.305613	0.41311	0.0906186	-0.0168785	0.41311	0.41311	-0.231873	-0.231873	0.198116	0.0906186	-0.231873	0.0906186	-0.124376	-0.0168785	0.305613	0.0906186
EMR17008_20170718_PA10_05B	M	X	R	0.702399	0.514538	0.514538	0.796329	0.796329	0.232748	1.17205	0.890259	0.608469	0.514538	0.514538	0.514538	0.232748	0.138818	0.514538	0.796329	0.232748	0.796329	1.17205	0.232748	0.890259	0.702399	0.232748	0.326678	0.232748	0.232748	-0.142973	0.0448875	-0.330833	0.0448875	0.326678	0.232748	0.0448875	0.326678	-0.236903	0.326678	0.232748	0.420608	0.326678	0.138818
EMR17008_20170718_PA10_09A	M	X	R	0.443722	0.568816	0.693911	0.819006	0.9441	0.819006	0.693911	1.69467	1.31938	0.443722	1.06919	0.819006	1.56957	0.819006	1.31938	1.19429	1.06919	0.443722	0.0684382	0.9441	0.568816	0.0684382	0.193533	0.0684382	-0.0566564	-0.181751	-0.181751	-0.0566564	0.193533	-0.181751	0.568816	-0.0566564	0.193533	-0.306846	-0.181751	-0.306846	0.318627	0.318627	0.443722	0.0684382
EMR17008_20170718_PA10_09B	M	X	R	0.27793	-0.0264473	0.886684	0.734495	0.582307	0.886684	0.734495	0.734495	0.734495	0.430118	-0.0264473	0.886684	0.430118	1.34325	0.886684	0.734495	0.886684	0.734495	1.49544	0.430118	0.430118	0.430118	0.27793	-0.0264473	0.27793	0.27793	-0.178636	-0.0264473	-0.0264473	-0.0264473	0.734495	1.64763	1.03887	0.886684	0.734495	0.734495	0.430118	0.582307	0.582307	0.125741
EMR17008_20170718_PA10_11A	M		R	0.240345	0.06507	0.590895	0.240345	0.06507	0.590895	0.240345	0.590895	0.06507	0.41562	0.41562	-0.110205	0.06507	-0.110205	-0.110205	-0.110205	-0.110205	-0.28548	-0.110205	0.06507	0.06507	0.240345	0.590895	-0.28548	-0.110205	-0.110205	-0.110205	-0.110205	-0.110205	-0.28548	-0.28548	0.06507	-0.28548	0.06507	0.240345	0.41562	0.240345	0.240345	0.76617	0.240345
EMR17008_20170718_PA10_11B	M			0.347553	0.347553	0.347553	0.347553	-0.146668	0.100443	0.594663	-0.270223	-0.146668	-0.0231127	-0.0231127	-0.0231127	0.347553	-0.270223	0.471108	-0.146668	-0.0231127	-0.0231127	0.100443	-0.270223	-0.146668	-0.393778	-0.0231127	-0.393778	0.100443	-0.0231127	-0.270223	-0.270223	-0.146668	-0.270223	-0.146668	-0.146668	0.471108	0.594663	0.718219	0.347553	0.347553	0.718219	0.471108	0.347553
EMR17008_20170718_PA10_11C	M	X	R	0.301572	0.151718	0.00186453	0.451426	0.00186453	0.00186453	0.301572	0.151718	0.00186453	0.00186453	0.151718	0.60128	1.35055	0.301572	0.301572	0.60128	0.900988	1.65026	1.2007	2.69924	4.49748	4.94704	2.54938	0.451426	1.35055	1.05084	0.301572	-0.147989	0.00186453	0.00186453	0.151718	0.301572	0.751134	0.151718	0.451426	0.751134	0.301572	0.00186453	-0.147989	0.00186453
EMR17008_20170718_PA10_17A	M		R	0.375775	0.0714329	-0.23291	0.781565	0.375775	0.680118	0.781565	0.883013	0.883013	1.79604	0.477223	1.08591	0.375775	-0.131462	0.0714329	0.0714329	0.17288	0.375775	0.477223	0.680118	0.17288	0.274328	0.274328	0.0714329	0.375775	-0.131462	0.0714329	-0.23291	-0.131462	-0.435804	-0.334357	0.17288	-0.131462	0.0714329	-0.23291	-0.23291	-0.131462	-0.0300146	0.57867	0.375775
EMR17008_20170718_PA10_17B	M		R	0.370646	-0.0113178	-0.2023	0.084173	0.084173	-0.0113178	-0.393281	-0.29779	0.466136	0.179664	-0.106809	0.179664	0.179664	-0.106809	-0.106809	0.084173	-0.106809	0.179664	-0.393281	-0.29779	-0.0113178	-0.2023	-0.106809	-0.106809	0.084173	-0.0113178	-0.106809	-0.106809	-0.0113178	-0.2023	0.370646	-0.106809	0.370646	0.275155	0.466136	0.561627	0.370646	0.466136	0.084173	0.275155
EMR17008_20170718_PA10_19A	M	X	R	0.306866	0.546106	0.725536	0.306866	0.665726	0.486296	0.904966	0.486296	0.605916	0.785346	0.127436	1.80212	0.904966	0.605916	1.02459	1.02459	1.0844	1.02459	0.845156	0.904966	0.247056	0.366676	0.426486	0.366676	0.306866	0.605916	0.0676259	-0.171614	-0.0519942	-0.231424	-0.709905	-0.590285	-0.470664	-0.291234	-0.171614	-0.530475	-0.351044	-0.410854	-0.291234	0.00781585
EMR17008_20170718_PA10_19B	M	X	R	0.688441	0.0356775	0.222181	0.688441	0.688441	0.128929	0.128929	0.595189	0.222181	0.222181	0.408685	0.781692	0.688441	0.408685	0.128929	-0.150826	0.222181	0.688441	0.595189	0.128929	0.595189	0.222181	-0.523834	0.128929	0.0356775	-0.33733	0.0356775	0.0356775	0.595189	0.0356775	-0.150826	0.222181	-0.0575743	0.128929	0.128929	0.408685	0.0356775	0.222181	0.222181	0.315433
EMR17008_20170718_PA10_21A	M	X	R	0.482366	0.234054	0.234054	0.0685131	0.0685131	0.234054	0.813448	0.234054	0.565137	0.730678	0.565137	-0.0142574	0.565137	0.730678	0.151284	0.234054	0.234054	0.234054	0.151284	-0.0142574	0.234054	-0.179799	0.0685131	-0.179799	0.399595	0.234054	-0.262569	-0.262569	-0.34534	-0.593651	-0.510881	-0.179799	-0.262569	0.234054	0.0685131	-0.179799	0.565137	0.316825	0.0685131	0.151284
EMR17008_20170718_PA10_21B	M	X	R	0.241283	0.855238	0.241283	-0.197257	0.328991	0.855238	0.328991	0.679822	0.679822	1.11836	0.942946	1.46919	1.11836	0.679822	0.504407	0.76753	1.64461	0.942946	1.73232	1.73232	1.38149	0.592115	0.504407	0.416699	-0.372673	0.328991	-0.109549	-0.109549	-0.197257	-0.548089	-0.372673	-0.372673	-0.197257	-0.372673	-0.021841	0.328991	-0.021841	-0.197257	-0.021841	0.241283
EMR17008_20170718_PA10_21C	M		R	-0.157086	-0.157086	-0.313973	-0.392417	-0.23553	-0.0786428	-0.0786428	-0.0786428	-0.157086	-0.549303	-0.23553	-0.392417	-0.549303	-0.627747	-0.157086	-0.313973	-0.549303	-0.549303	-0.392417	-0.392417	-0.70619	-0.157086	-0.157086	-0.313973	-0.0786428	-0.313973	-0.157086	-0.157086	-0.23553	-0.392417	-0.23553	-0.157086	0.235131	0.313574	0.627348	0.470461	0.627348	1.2549	0.313574	0.156688
EMR17008_20170718_PA10_21D	M		R	-0.0737375	-0.168653	-0.263568	-0.263568	-0.168653	-0.263568	-0.0737375	-0.263568	0.495753	-0.0737375	-0.0737375	0.116093	0.305923	0.211008	0.685583	0.116093	0.116093	0.0211776	0.0211776	0.305923	0.685583	0.400838	-0.0737375	0.211008	0.400838	0.305923	0.0211776	-0.0737375	-0.0737375	-0.263568	-0.263568	-0.453398	0.211008	-0.0737375	0.305923	-0.453398	-0.358483	-0.168653	-0.263568	-0.168653
EMR17008_20170718_PA10_21E	M		R	-0.452577	0.0238745	-0.214351	0.579735	0.0238745	0.2621	0.738552	-0.134943	-0.214351	-0.373169	-0.29376	-0.0555341	0.103283	-0.214351	-0.29376	-0.134943	-0.611394	0.2621	-0.29376	-0.0555341	0.2621	-0.531986	-0.452577	-0.373169	-0.134943	0.103283	-0.452577	-0.373169	-0.134943	-0.452577	-0.531986	-0.214351	-0.611394	-0.0555341	-0.0555341	-0.134943	0.341509	0.103283	0.2621	0.103283
EMR17008_20170718_PA10_23A	M	X	L	0.541817	0.0234014	0.153005	0.0882033	0.0882033	0.217807	-0.0414006	-0.36541	-0.300608	-0.430212	0.0234014	-0.624618	-0.624618	-0.495014	-0.68942	-0.754222	-0.754222	-0.819024	-0.430212	-0.68942	-0.495014	-0.300608	-0.68942	-0.819024	-0.819024	-0.430212	-0.754222	-0.819024	-0.883826	-0.819024	-0.754222	-0.559816	-0.559816	-0.495014	0.0882033	0.217807	0.736223	0.995431	1.25464	0.671421
EMR17008_20170718_PA10_23B	M	X	R	0.0615926	-0.212779	0.720084	0.500587	0.884707	0.445712	0.445712	0.610335	0.720084	0.226215	0.335964	1.21395	-0.157904	-0.377402	-0.596899	-0.432276	-0.706647	-0.706647	-0.816396	-0.596899	-0.761521	-0.706647	-0.651773	-0.542024	-0.651773	-0.432276	-0.761521	-0.87127	-0.542024	-0.706647	-0.761521	-0.542024	-0.651773	-0.761521	-0.761521	-0.596899	0.171341	0.171341	0.0615926	0.28109
EMR17008_20170718_PA10_23C	M	X	R	0.507381	0.507381	0.238493	0.372937	0.417752	0.821083	0.731454	0.552196	0.776269	0.686639	0.462566	-0.0303944	0.731454	0.104049	0.910712	0.283308	0.104049	-0.388911	-0.164838	0.372937	0.641825	0.507381	0.641825	0.193679	0.417752	0.148864	-0.164838	0.0144202	-0.120024	0.238493	-0.344097	-0.388911	-0.433726	-0.299282	0.283308	0.507381	0.283308	0.417752	0.417752	1.4933
EMR17008_20170718_PA10_23D	M	X	R	-0.0934016	0.104867	0.170956	-0.0934016	-0.0273121	-0.0273121	0.0387774	-0.0273121	0.237046	0.170956	-0.225581	-0.35776	-0.556028	0.0387774	-0.29167	-0.35776	-0.29167	-0.225581	-0.423849	-0.556028	-0.0934016	-0.35776	-0.29167	-0.489939	-0.688207	-0.423849	-0.489939	-0.489939	0.170956	0.170956	-0.489939	-0.0934016	-0.225581	0.104867	-0.0273121	0.369225	0.303135	0.435314	0.104867	0.435314
EMR17008_20170718_PA10_29A	M	X	R	-0.224612	-0.224612	-0.310924	-0.0951435	-0.310924	-0.267768	0.163793	0.163793	-0.440392	0.120637	-0.00883146	0.293261	-0.0951435	-0.35408	-0.1383	-0.0519875	-0.00883146	0.120637	0.509041	0.0774806	-0.35408	0.0343246	0.120637	0.422729	0.681665	0.465885	0.293261	-0.310924	0.293261	-0.224612	-0.310924	0.0343246	-0.1383	-0.181456	0.163793	-0.397236	-0.00883146	0.120637	0.250105	0.163793
EMR17008_20170718_PA10_29B	M		R	0.162399	-0.196975	-0.077184	-0.196975	0.162399	0.0426074	0.0426074	-0.196975	-0.196975	-0.196975	-0.077184	0.0426074	0.0426074	-0.077184	-0.077184	-0.436558	-0.436558	-0.436558	-0.196975	0.0426074	-0.196975	-0.316767	-0.316767	-0.196975	-0.436558	-0.436558	-0.436558	-0.316767	-0.316767	-0.077184	-0.316767	-0.077184	-0.077184	0.162399	-0.316767	-0.316767	-0.316767	-0.077184	-0.316767	0.0426074
EMR17008_20170718_PA10_31A	M	X	R	0.413389	0.122199	-0.168991	-0.168991	-0.168991	-0.168991	0.413389	-0.168991	0.122199	0.413389	0.122199	-0.168991	-0.168991	-0.168991	0.122199	-0.168991	-0.168991	0.704579	0.413389	0.995769	1.28696	0.122199	0.995769	0.995769	0.122199	0.122199	-0.168991	-0.168991	0.122199	0.122199	0.413389	-0.168991	-0.168991	0.704579	-0.168991	-0.168991	-0.168991	0.122199	-0.168991	0.413389

## Sheet: Propanolol LP Left
ID	sex	Sidepref	LP	Zscore -3	-2.9	-2.8	-2.7	-2.6	-2.5	-2.4	-2.3	-2.2	-2.1	-2	-1.9	-1.8	-1.7	-1.6	-1.5	-1.4	-1.3	-1.2	-1.1	-1	-0.9	-0.8	-0.7	-0.6	-0.5	-0.4	-0.3	-0.2	-0.1	0	0.1	0.2	0.3	0.4	0.5	0.6	0.7	0.8	0.9
CDH16002_20161103_PA10_01A	F		R	-0.120556	-0.344949	0.178634	0.403027	0.552622	-0.0457584	0.328229	0.103837	-0.0457584	0.253432	0.103837	-0.195353	-0.0457584	0.552622	-0.0457584	0.253432	0.178634	0.103837	0.103837	0.0290391	0.103837	0.178634	-0.270151	0.0290391	-0.0457584	0.0290391	0.253432	0.403027	-0.0457584	-0.344949	0.0290391	0.253432	-0.120556	0.253432	-0.120556	0.103837	-0.120556	-0.120556	-0.569341	-0.195353
CDH16002_20161103_PA10_17A	F		R	-0.25245	0.154446	-0.25245	-0.25245	-0.25245	-0.049002	-0.25245	-0.25245	-0.049002	-0.25245	0.154446	0.561341	-0.049002	-0.049002	-0.25245	-0.049002	-0.25245	-0.25245	-0.25245	-0.049002	-0.25245	0.154446	-0.049002	0.357893	-0.25245	-0.25245	-0.25245	-0.25245	-0.049002	-0.25245	0.154446	0.154446	-0.25245	-0.25245	0.154446	-0.25245	-0.049002	-0.049002	-0.25245	-0.049002
CDH16002_20161103_PA10_19A	F		R	-0.169283	-0.169283	-0.169283	-0.169283	-0.169283	-0.169283	-0.169283	-0.169283	-0.169283	-0.169283	-0.169283	-0.169283	-0.169283	-0.169283	-0.169283	-0.169283	-0.169283	-0.169283	-0.169283	-0.169283	-0.169283	-0.169283	-0.169283	-0.169283	-0.169283	-0.169283	-0.169283	0.299421	-0.169283	0.0650693	1.00248	0.768125	1.70553	1.00248	1.70553	0.768125	0.533773	-0.169283	1.23683	0.533773
CDH16002_20161103_PA10_19B	F	X	R	-0.299136	-0.299136	-0.556703	-0.234745	0.022822	-0.492311	-0.363528	-0.170353	0.0872137	-0.170353	-0.42792	-0.234745	-0.170353	-0.105961	-0.42792	-0.0415697	-0.492311	0.151605	-0.234745	-0.234745	-0.299136	-0.105961	-0.105961	-0.299136	0.022822	-0.492311	-0.492311	-0.749878	-0.42792	-0.105961	-0.556703	-0.42792	-0.556703	-0.621095	-0.621095	-0.749878	-0.492311	-0.81427	-0.943053	-0.943053
CDH16002_20161103_PA10_19C	F		R	0.301614	0.110144	0.0144083	0.349482	0.636688	0.493085	0.301614	0.0144083	0.39735	0.253747	0.062276	0.158011	0.349482	0.253747	-0.272798	0.158011	0.253747	0.0144083	-0.129195	0.445217	0.158011	-0.416401	-0.655739	-0.0813271	-0.272798	-0.22493	-0.0813271	0.253747	0.0144083	0.110144	0.158011	0.158011	0.349482	0.301614	0.39735	0.971762	0.540953	0.205879	0.301614	0.636688
CDH16003_20161102_PA10_01A	F	X	L	0.28921	0.0946898	0.0168816	-0.333255	-0.216543	-0.372159	0.0168816	-0.255447	-0.449967	-0.372159	-0.0609265	-0.333255	-0.333255	-0.177639	-0.177639	-0.411063	-0.216543	0.0168816	-0.0609265	-0.0220225	-0.333255	-0.255447	-0.449967	-0.605584	-0.605584	-0.333255	0.0946898	0.522635	0.756059	1.184	1.184	1.30072	-0.0220225	-0.372159	-0.449967	-0.488871	-0.488871	-0.683392	-0.56668	-0.411063
CDH16003_20161102_PA10_25A	F	X	R	-0.171218	-0.252812	-0.0080309	0.399938	-0.171218	-0.0896246	-0.0896246	0.0735628	0.399938	-0.334406	-0.0896246	-0.171218	-0.0080309	0.0735628	-0.252812	0.155156	-0.0896246	-0.0896246	-0.0896246	-0.252812	-0.0896246	0.0735628	-0.0080309	0.0735628	0.563125	0.563125	0.155156	0.155156	0.23675	-0.252812	-0.0896246	-0.171218	0.155156	-0.0080309	-0.0080309	0.155156	0.23675	0.399938	0.0735628	0.23675
CDH16005_20161107_PA10_05A	M	X	L	0.384618	0.0745491	0.446632	0.105556	0.415625	-0.0494784	0.0745491	-0.0184715	-0.266526	-0.204513	-0.0494784	0.0745491	0.105556	0.0435423	0.105556	0.136563	0.26059	0.26059	0.632673	0.632673	0.942742	0.694687	1.12878	0.694687	1.25281	1.1908	0.787707	0.291597	0.415625	0.632673	0.446632	0.198577	0.415625	-0.0184715	-0.297533	-0.421561	-0.359547	-0.0184715	0.105556	0.539652
CDH16005_20161107_PA10_07A	M	X	R	-0.0705579	-0.0990311	0.128755	-0.26987	-0.127504	-0.155978	-0.155978	0.498907	0.35654	0.185701	0.35654	0.641273	0.128755	0.584326	0.44196	0.0148618	0.584326	0.669746	0.498907	0.385014	0.44196	0.100281	-0.526129	-0.35529	-0.44071	-0.554603	-0.583076	-0.953228	-0.839335	-0.725442	-0.640022	-0.668496	-0.184451	0.299594	0.299594	0.271121	0.100281	-0.0420846	-0.26987	0.498907
CDH16005_20161107_PA10_09A	M		L	-0.197876	-0.254036	-0.197876	-0.197876	-0.0293966	0.139083	-0.0293966	0.0267632	0.0267632	0.139083	-0.0293966	-0.0855565	0.588362	0.476042	0.0829231	0.363723	0.307563	0.588362	0.195243	0.532202	0.195243	0.476042	0.307563	0.0829231	0.0829231	-0.0855565	-0.0293966	-0.141716	-0.141716	-0.254036	-0.0293966	-0.0855565	-0.197876	-0.141716	-0.141716	-0.366356	-0.0855565	-0.0293966	-0.0855565	-0.141716
CDH16005_20161107_PA10_09B	M		R	-0.0309116	0.189459	0.244552	0.189459	0.244552	0.0792737	0.740385	0.0792737	-0.196189	-0.141097	0.0241811	0.134366	-0.251282	0.0241811	0.189459	0.134366	0.464922	-0.196189	-0.196189	-0.306375	0.244552	0.0792737	0.299644	0.0792737	0.0241811	-0.306375	-0.196189	-0.0309116	-0.251282	-0.0309116	0.0241811	0.189459	-0.141097	-0.0309116	-0.0860042	-0.0309116	-0.196189	0.0792737	-0.196189	-0.0860042
CDH16005_20161107_PA10_13A	M	X	R	-0.250414	-0.128276	-0.00613738	0.238139	0.319564	0.197426	-0.00613738	0.238139	0.278852	-0.168988	-0.0468501	0.197426	-0.0468501	0.238139	0.197426	0.238139	0.116001	-0.0468501	0.116001	0.156714	-0.0875628	-0.250414	-0.168988	-0.00613738	-0.250414	-0.413265	-0.453977	-0.616828	-0.372552	-0.49469	-0.331839	-0.331839	-0.291126	-0.372552	-0.0875628	0.116001	0.238139	0.40099	0.0345753	0.360277
CDH16005_20161107_PA10_15A	M		R	0.170722	-0.161199	0.0877418	0.212212	-0.119709	0.00476152	0.295193	-0.161199	0.170722	-0.0782188	-0.202689	-0.32716	-0.36865	-0.0367286	-0.32716	-0.119709	-0.0782188	-0.202689	-0.244179	-0.0782188	-0.0782188	-0.161199	-0.161199	0.0462517	0.0877418	0.212212	0.0877418	-0.202689	0.461153	0.129232	-0.45163	-0.534611	0.253702	0.336683	-0.119709	-0.0782188	-0.119709	-0.49312	-0.36865	-0.49312
CDH16005_20161107_PA10_21A	M	X	L	-0.265619	-0.200702	-0.298078	-0.168243	-0.0384085	-0.168243	0.0589674	-0.0708672	-0.00594987	-0.200702	-0.0384085	-0.330536	-0.330536	-0.265619	-0.0708672	-0.23316	-0.395454	-0.168243	-0.103326	-0.135785	-0.00594987	-0.00594987	-0.298078	0.221261	-0.0384085	0.0589674	-0.00594987	0.286178	-0.265619	-0.590206	-0.784958	-0.882334	-0.687582	-0.0384085	-0.200702	-0.395454	-0.49283	-0.460371	-0.135785	-0.200702
CDH16005_20161107_PA10_21B	M		R	0.140558	0.140558	0.19814	0.0253939	0.082976	-0.0321882	-0.262517	0.082976	-0.0321882	0.0253939	-0.0321882	-0.262517	-0.147352	0.0253939	-0.262517	0.082976	-0.262517	-0.435263	-0.147352	-0.204935	0.140558	-0.147352	0.370887	0.19814	0.082976	0.313304	0.140558	0.082976	0.082976	-0.377681	0.0253939	-0.262517	-0.204935	-0.0321882	-0.320099	-0.147352	-0.492845	-0.320099	-0.492845	-0.320099
CDH16005_20161107_PA10_21C	M		L	0.238482	-0.0499359	0.0221686	0.310587	-0.194145	-0.12204	-0.194145	-0.12204	-0.194145	-0.0499359	-0.12204	-0.194145	-0.12204	-0.194145	-0.266249	-0.0499359	-0.266249	-0.194145	-0.266249	-0.194145	-0.266249	-0.266249	-0.266249	0.166378	0.166378	0.599004	0.166378	0.238482	0.599004	1.10374	0.382691	0.599004	0.454795	0.454795	0.5269	0.0942731	0.238482	0.0221686	-0.12204	-0.194145
CDH16008_20161102_PA10_19A	M	X	R	-0.00111353	-0.113813	-0.113813	0.393334	-0.0574631	0.336984	0.393334	0.618732	0.280634	0.506033	0.675082	0.336984	0.336984	0.336984	-0.00111353	-0.0574631	-0.113813	-0.113813	-0.113813	-0.113813	0.0552361	-0.170162	0.0552361	0.0552361	0.336984	-0.00111353	0.224285	-0.0574631	0.0552361	0.224285	0.167935	0.111586	0.0552361	0.0552361	-0.0574631	-0.113813	-0.00111353	-0.170162	0.111586	-0.00111353
CDH16010_20161104_PA10_01A	F		R	1.15372	0.358395	0.676526	0.0402637	0.358395	0.0402637	0.358395	0.994657	0.0402637	0.835591	0.51746	0.358395	0.994657	1.15372	0.358395	0.994657	0.51746	1.63092	0.676526	0.199329	0.358395	0.51746	0.0402637	0.358395	0.358395	-0.118802	0.199329	-0.118802	-0.277867	0.358395	-0.118802	-0.118802	0.0402637	0.0402637	-0.277867	0.676526	0.51746	0.0402637	0.51746	0.51746
CDH16010_20161104_PA10_01B	F	X	R	0.558887	0.226671	0.226671	-0.216285	0.115932	0.115932	-0.327023	-0.216285	-0.105546	0.005193	0.115932	0.005193	0.337409	0.115932	0.115932	1.00184	0.226671	0.558887	1.00184	0.669626	0.780365	0.115932	0.669626	0.115932	0.226671	0.005193	-0.437762	-0.327023	-0.437762	-0.216285	-0.437762	0.558887	0.115932	0.226671	0.337409	0.005193	0.337409	0.226671	0.558887	0.226671
CDH16010_20161104_PA10_01C	F		L	-0.258758	-0.258758	-0.258758	-0.258758	0.0069882	-0.258758	0.0069882	0.0069882	-0.258758	0.0069882	-0.258758	-0.258758	0.0069882	-0.258758	-0.258758	0.272734	-0.258758	0.272734	-0.258758	0.272734	0.0069882	-0.258758	0.0069882	-0.258758	-0.258758	-0.258758	0.0069882	0.0069882	0.272734	0.272734	0.272734	0.272734	0.272734	0.53848	0.0069882	0.272734	0.0069882	0.0069882	0.0069882	0.0069882
CDH16010_20161104_PA10_05A	F		R	-0.368846	-0.368846	-0.571533	-0.571533	-0.368846	-0.571533	-0.470189	-0.571533	-0.470189	-0.267502	-0.571533	-0.470189	-0.571533	-0.267502	-0.368846	-0.267502	-0.368846	-0.368846	-0.470189	-0.571533	-0.470189	-0.470189	-0.470189	-0.571533	-0.571533	-0.470189	-0.368846	-0.064815	-0.368846	0.0365286	-0.470189	-0.064815	0.239216	-0.064815	-0.368846	-0.368846	-0.470189	-0.267502	-0.267502	-0.470189
CDH16010_20161104_PA10_05B	F		R	-0.110328	0.196089	-0.110328	0.502506	0.0428805	0.349297	0.349297	0.502506	0.502506	0.196089	0.196089	0.0428805	0.349297	0.349297	-0.263536	0.196089	0.0428805	0.196089	0.349297	0.0428805	0.196089	-0.110328	-0.110328	0.196089	-0.110328	-0.416745	0.196089	0.0428805	-0.110328	0.0428805	-0.263536	-0.416745	-0.416745	-0.416745	-0.110328	0.196089	-0.110328	0.0428805	-0.416745	0.0428805
CDH16010_20161104_PA10_05C	F	X	R	-0.464208	-0.464208	-0.00264816	0.343522	-0.233428	-0.118038	-0.348818	-0.118038	-0.233428	0.458912	0.112742	0.112742	-0.233428	-0.464208	-0.348818	-0.348818	-0.233428	-0.464208	-0.233428	-0.233428	-0.348818	-0.464208	-0.464208	-0.579598	-0.694988	-0.579598	-0.348818	-0.464208	-0.579598	0.112742	-0.348818	0.228132	-0.233428	-0.233428	0.112742	-0.579598	-0.579598	-0.348818	-0.348818	0.112742
CDH16010_20161104_PA10_07A	F	X	R	0.308891	-0.234602	0.526288	-0.234602	0.200193	-0.0172045	-0.3433	0.526288	0.308891	0.634987	0.634987	0.308891	0.852384	1.06978	0.961082	0.634987	0.526288	0.308891	0.200193	0.634987	0.41759	-0.125903	-0.0172045	-0.234602	0.308891	-0.3433	0.0914941	0.961082	0.200193	0.0914941	-0.125903	0.41759	0.308891	0.0914941	0.0914941	0.41759	0.41759	0.0914941	-0.0172045	0.0914941
CDH16010_20161104_PA10_07B	F	X	R	0.0749087	0.237992	0.0749087	-0.0881744	0.727241	0.401075	0.401075	-0.0881744	0.0749087	0.727241	0.401075	-0.0881744	0.0749087	0.401075	0.0749087	-0.0881744	0.727241	-0.251257	-0.0881744	0.401075	0.237992	0.401075	-0.0881744	0.0749087	0.564158	0.237992	0.401075	0.401075	0.0749087	0.727241	0.401075	0.890324	0.564158	0.564158	0.0749087	-0.0881744	0.727241	0.564158	0.890324	0.401075
CDH16010_20161104_PA10_11A	F		R	0.0172185	0.107336	0.287572	0.557925	-0.253135	0.467807	0.287572	0.828278	0.197454	0.73816	-0.0728992	-0.613606	-0.253135	-0.163017	-0.613606	-0.343252	-0.613606	-0.523488	-0.703723	-0.43337	-0.703723	0.107336	0.107336	-0.0728992	0.828278	1.09863	1.27887	0.648043	1.00851	1.18875	1.18875	0.377689	0.377689	0.828278	0.377689	0.377689	0.197454	0.197454	0.0172185	0.107336
CDH16010_20161104_PA10_13A	F	X	R	0.120736	0.370682	0.745601	0.245709	-0.254182	0.120736	0.370682	0.370682	-0.00423651	0.495655	-0.00423651	-0.00423651	-0.379155	-0.00423651	-0.254182	-0.379155	-0.129209	-0.504128	-0.254182	-0.129209	-0.00423651	-0.129209	0.620628	0.870574	-0.00423651	0.245709	0.120736	0.620628	0.370682	0.370682	-0.00423651	-0.00423651	0.245709	-0.00423651	-0.504128	-0.254182	-0.129209	0.120736	-0.00423651	-0.00423651
CDH16010_20161104_PA10_15A	F	X	L	0.876796	0.296043	0.199251	0.102458	0.296043	0.199251	0.489627	0.102458	0.00566609	-0.478295	0.58642	-0.575087	0.392835	0.392835	0.392835	0.489627	0.876796	0.102458	0.973588	0.489627	0.102458	0.296043	0.780004	0.296043	0.58642	0.296043	0.296043	0.876796	-0.187918	-0.284711	0.102458	-0.0911261	0.102458	-0.187918	-0.187918	-0.187918	0.392835	-0.478295	-0.575087	-0.478295
CDH16010_20161104_PA10_15B	F	X	R	-0.305587	0.110885	0.24971	0.110885	-0.166763	-0.166763	1.08265	1.3603	-0.0279389	-0.166763	-0.0279389	-0.166763	0.110885	-0.444412	-0.0279389	0.527358	0.110885	-0.444412	0.388534	-0.444412	0.666182	0.110885	-0.305587	-0.444412	-0.166763	-0.583236	-0.166763	-0.583236	-0.305587	-0.305587	-0.166763	-0.0279389	-0.305587	-0.444412	-0.305587	-0.444412	-0.305587	-0.0279389	-0.305587	-0.305587
CDH16010_20161104_PA10_17A	F		R	0.418481	0.0948603	0.337576	0.256671	0.337576	0.0948603	0.175765	0.499386	0.0139551	0.823007	0.661197	0.337576	0.175765	-0.309666	0.580291	0.580291	0.903912	0.580291	0.984817	0.580291	0.337576	0.580291	0.580291	1.14663	0.337576	0.337576	0.0139551	-0.0669501	0.256671	-0.309666	-0.0669501	-0.309666	0.0948603	-0.22876	0.256671	0.0948603	0.0948603	0.256671	0.418481	0.418481
CDH16010_20161104_PA10_17B	F	X	R	-0.367311	-0.641122	0.0434061	-0.367311	-0.641122	-0.504216	-0.504216	-0.504216	-0.504216	-0.641122	-0.230405	-0.504216	-0.504216	-0.504216	-0.641122	-0.504216	-0.504216	-0.367311	-0.367311	-0.230405	0.0434061	0.454123	0.180312	0.317217	0.180312	0.317217	0.180312	0.454123	0.180312	0.591028	0.180312	0.591028	0.317217	0.0434061	0.591028	0.0434061	-0.0934995	0.454123	-0.230405	0.180312
CDH16010_20161104_PA10_17C	F		R	-0.122403	-0.122403	-0.122403	-0.122403	-0.122403	-0.410839	0.166033	-0.266621	-0.266621	-0.122403	-0.266621	-0.266621	-0.266621	-0.266621	0.0218147	-0.122403	-0.122403	-0.555057	0.166033	-0.122403	-0.122403	-0.410839	-0.122403	-0.122403	-0.122403	-0.555057	-0.555057	-0.122403	-0.410839	-0.410839	-0.410839	-0.555057	0.0218147	-0.266621	-0.122403	0.166033	-0.266621	0.0218147	-0.266621	-0.266621
CDH16010_20161104_PA10_21A	F	X		-0.333782	-0.0133525	-0.493996	0.146862	-0.173567	-0.0133525	-0.0133525	-0.333782	0.307077	-0.333782	0.307077	0.146862	0.627506	-0.173567	-0.0133525	0.146862	0.146862	-0.0133525	-0.333782	0.307077	0.467291	-0.173567	0.146862	-0.0133525	-0.333782	-0.173567	-0.493996	-0.333782	-0.0133525	-0.333782	-0.333782	-0.0133525	-0.173567	-0.0133525	-0.173567	-0.0133525	0.307077	0.627506	-0.0133525	0.146862
CDH16010_20161104_PA10_21B	F		R	0.401771	0.0136544	0.207713	0.0136544	-0.180404	-0.0833748	-0.0833748	0.207713	0.0136544	-0.277433	0.110684	-0.0833748	-0.180404	0.304742	0.110684	0.0136544	0.0136544	0.207713	-0.180404	-0.0833748	0.4988	0.0136544	-0.277433	0.692859	0.4988	0.110684	0.110684	-0.180404	-0.568521	-0.180404	-0.180404	0.304742	0.789888	-0.277433	0.59583	0.4988	0.304742	0.4988	0.207713	0.110684
CDH16010_20161104_PA10_21C	F	X	R	0.194024	-0.138826	0.304974	0.415924	-0.138826	0.0830736	-0.360726	-0.138826	-0.0278764	-0.471676	0.0830736	-0.360726	-0.0278764	-0.360726	-0.360726	-0.804526	-0.360726	-0.582626	-0.804526	-0.582626	-0.693576	-0.693576	-0.582626	-0.693576	-0.693576	-0.360726	-0.249776	-0.138826	0.304974	-0.138826	0.526874	0.304974	0.0830736	-0.0278764	0.415924	0.194024	-0.138826	0.526874	0.194024	0.304974
CDH16010_20161104_PA10_23A	F	X	R	-0.418178	0.256447	-0.0134034	0.391371	-0.283253	-0.148328	-0.148328	-0.148328	-0.0134034	-0.0134034	-0.418178	0.661221	0.121522	0.121522	-0.283253	0.121522	0.391371	-0.148328	-0.0134034	0.121522	0.526296	-0.0134034	0.121522	-0.148328	0.256447	0.661221	-0.283253	0.256447	0.256447	0.121522	0.256447	-0.0134034	0.391371	0.931071	0.256447	0.121522	0.931071	1.066	0.256447	0.121522
CDH16010_20161104_PA10_23B	F	X	R	-0.0105122	0.812055	0.400771	0.894311	0.647541	0.318515	1.14108	0.565285	1.47011	1.47011	1.05882	1.47011	0.894311	1.22334	1.30559	0.729798	1.38785	0.400771	0.976568	0.400771	0.236258	0.0717445	-0.0105122	-0.668566	-0.586309	-0.257282	-0.668566	-0.833079	-0.504052	-0.257282	-0.668566	-0.586309	-0.339539	-0.750822	-0.421796	-0.0927689	-0.257282	-0.504052	-0.668566	-0.175026
CDH16010_20161104_PA10_23C	F	X	R	0.362114	0.239394	0.362114	0.484835	0.852997	-0.00604772	-0.128768	0.362114	0.484835	0.730277	0.484835	0.239394	1.09844	0.484835	1.09844	0.362114	0.484835	0.730277	-0.128768	0.362114	0.116673	0.607556	0.362114	-0.251489	-0.251489	0.116673	-0.128768	0.484835	0.116673	0.607556	0.239394	-0.37421	0.239394	0.362114	-0.00604772	-0.128768	-0.00604772	-0.251489	0.362114	0.239394
CDH16010_20161104_PA10_23D	F		L	-0.038923	-0.172309	-0.439082	0.22785	-0.305696	-0.172309	-0.172309	0.0944635	0.0944635	-0.305696	-0.439082	-0.172309	-0.172309	-0.172309	0.0944635	-0.172309	-0.172309	-0.038923	0.22785	0.494623	0.494623	0.0944635	0.494623	0.761396	-0.172309	-0.439082	-0.172309	0.0944635	-0.038923	-0.172309	-0.038923	-0.305696	-0.172309	-0.172309	0.0944635	0.22785	-0.038923	-0.439082	-0.038923	0.0944635
CDH16010_20161104_PA10_23E	F	X	R	0.770518	-0.141005	-0.0107878	0.249647	0.249647	-0.141005	0.11943	-0.271223	-0.141005	-0.0107878	-0.141005	0.249647	0.379865	-0.0107878	0.11943	0.11943	0.379865	0.11943	-0.271223	0.770518	-0.0107878	0.900735	0.249647	0.6403	-0.0107878	0.11943	-0.0107878	-0.0107878	0.11943	0.249647	0.900735	1.16117	0.510083	1.03095	0.770518	0.6403	1.29139	1.42161	1.55182	1.03095
CDH16010_20161104_PA10_25A	F	X	L	0.162664	-0.331643	0.162664	-0.455219	-0.331643	-0.0844894	-0.331643	-0.331643	-0.331643	-0.331643	-0.331643	-0.0844894	-0.578796	-0.331643	-0.208066	-0.208066	-0.331643	-0.455219	-0.455219	-0.578796	-0.455219	-0.455219	-0.208066	-0.0844894	-0.455219	-0.0844894	-0.208066	-0.455219	-0.0844894	-0.0844894	-0.455219	-0.0844894	-0.331643	-0.578796	-0.208066	-0.208066	-0.331643	-0.208066	-0.208066	-0.455219
CDH16010_20161104_PA10_25B	F		L	0.186739	0.306211	0.425683	0.0672671	0.306211	0.545155	0.425683	0.306211	0.0672671	0.425683	0.545155	0.425683	-0.291149	-0.171677	-0.0522049	0.664627	0.425683	0.903571	1.02304	1.85935	1.02304	0.664627	1.26199	0.664627	0.903571	0.545155	0.664627	-0.410621	-0.171677	0.545155	0.903571	0.784099	1.02304	0.903571	1.26199	1.50093	1.26199	1.26199	0.186739	0.425683
CDH16010_20161104_PA10_25C	F		R	-0.107363	0.0100832	-0.342257	-0.342257	-0.459703	-0.342257	-0.459703	-0.342257	-0.22481	-0.342257	0.0100832	-0.57715	0.244976	0.0100832	0.12753	0.0100832	-0.22481	0.244976	-0.459703	-0.459703	-0.22481	0.12753	-0.342257	-0.107363	0.0100832	-0.107363	-0.459703	0.0100832	0.47987	-0.342257	0.0100832	-0.107363	-0.342257	-0.107363	-0.22481	-0.22481	-0.107363	-0.342257	-0.22481	0.12753
CDH16010_20161104_PA10_25D	F		R	-0.259497	-0.395546	-0.259497	-0.395546	-0.531595	-0.531595	-0.531595	-0.531595	-0.531595	-0.531595	-0.531595	-0.531595	-0.531595	-0.531595	-0.531595	-0.531595	-0.531595	-0.531595	-0.531595	-0.531595	-0.531595	-0.531595	-0.531595	-0.531595	-0.531595	-0.531595	-0.531595	-0.531595	-0.531595	-0.531595	-0.531595	-0.531595	-0.531595	-0.531595	-0.531595	-0.531595	-0.259497	-0.531595	-0.531595	-0.531595
CDH16010_20161104_PA10_27A	F	X	R	-0.204092	0.124806	-0.0396426	0.535929	0.0425819	-0.0396426	0.535929	0.782602	0.453704	0.535929	0.618153	0.289255	0.864827	1.02928	1.02928	0.0425819	0.618153	0.453704	0.37148	-0.0396426	0.207031	0.618153	-0.0396426	-0.204092	-0.121867	0.124806	0.289255	0.289255	0.207031	0.289255	0.453704	0.782602	0.535929	0.535929	0.289255	0.207031	0.947051	0.453704	0.124806	0.124806
CDH16010_20161104_PA10_27B	F	X	R	0.337915	0.648485	1.19198	0.4932	0.415558	0.4932	-0.0502966	0.182631	0.260273	0.337915	0.260273	0.415558	0.415558	0.182631	0.260273	0.337915	-0.0502966	0.4932	0.260273	0.104988	0.0273458	-0.283224	-0.438508	-0.0502966	0.260273	-0.127939	-0.0502966	-0.0502966	0.415558	-0.127939	-0.0502966	-0.283224	-0.205581	0.182631	0.648485	0.104988	0.0273458	0.4932	0.337915	-0.205581
CDH16010_20161104_PA10_29A	F	X	R	-0.221122	-0.633029	-0.633029	-0.324099	0.190784	-0.324099	-0.324099	-0.118146	-0.324099	-0.530052	-0.324099	-0.530052	-0.427076	-0.633029	-0.736006	-0.324099	-0.324099	-0.530052	-0.324099	-0.427076	-0.427076	-0.633029	-0.530052	-0.427076	-0.530052	-0.324099	-0.530052	-0.736006	-0.736006	-0.633029	-0.633029	-0.427076	-0.736006	-0.530052	-0.530052	-0.427076	-0.427076	0.0878076	-0.118146	-0.427076
CDH16010_20161104_PA10_29B	F		R	-0.367238	-0.223997	0.0624833	0.0624833	-0.080757	-0.223997	0.0624833	0.0624833	0.0624833	-0.080757	0.0624833	-0.367238	0.205724	0.0624833	-0.080757	-0.223997	-0.080757	-0.367238	-0.367238	-0.223997	-0.367238	-0.080757	-0.367238	-0.367238	-0.223997	-0.367238	-0.367238	-0.367238	-0.367238	-0.367238	-0.367238	-0.223997	-0.367238	-0.367238	-0.367238	-0.367238	-0.080757	-0.080757	-0.080757	-0.367238
CDH16010_20161104_PA10_29C	F	X	R	-0.267606	-0.439434	-0.0957779	-0.267606	-0.267606	-0.0957779	-0.267606	-0.0957779	-0.0957779	-0.0957779	0.419707	-0.267606	0.0760502	0.0760502	-0.0957779	0.591535	0.419707	0.419707	0.935191	0.763363	0.0760502	-0.267606	-0.0957779	0.0760502	0.0760502	-0.439434	-0.267606	0.247878	0.0760502	1.10702	0.0760502	0.247878	0.0760502	-0.267606	-0.267606	-0.0957779	-0.0957779	-0.0957779	0.247878	0.247878
CDH16019_20161109_PA10_01A	M		R	0.319994	-0.280384	-0.040233	-0.040233	0.259956	0.319994	0.199918	0.199918	0.620182	0.800296	0.259956	0.319994	-0.040233	-0.040233	0.13988	0.860333	0.199918	0.0198048	0.319994	-0.100271	0.13988	0.0798425	0.380031	0.0798425	-0.160309	-0.100271	-0.340422	-0.220346	-0.280384	-0.340422	-0.040233	-0.160309	-0.220346	-0.220346	-0.100271	-0.160309	-0.280384	0.13988	0.0798425	0.199918
CDH16019_20161109_PA10_03A	M	X	L	-0.37499	-0.308348	-0.241706	-0.308348	-0.175064	0.0915035	0.0248616	0.0915035	-0.241706	-0.0417804	-0.108422	0.291429	0.358071	0.624639	0.358071	0.491355	1.02449	1.02449	0.891207	0.291429	0.491355	0.158145	0.0248616	0.291429	0.224787	-0.175064	-0.37499	-0.37499	-0.441632	-0.37499	-0.37499	-0.37499	-0.441632	-0.441632	-0.441632	-0.441632	-0.308348	-0.241706	-0.441632	-0.308348
CDH16019_20161109_PA10_05A	M	X	R	0.891338	0.762427	0.418665	0.461635	0.418665	0.719457	0.375695	0.504605	0.934308	0.676486	0.633516	0.246784	0.375695	0.289754	-0.0969782	0.0319325	-0.268859	-0.3548	-0.698562	-0.655591	-0.569651	-0.526681	-0.44074	-0.48371	-0.225889	-0.0110377	-0.311829	0.0749028	0.418665	0.203814	0.0749028	-0.0110377	-0.0110377	0.418665	0.633516	0.805397	1.53589	1.27807	1.10619	1.49292
CDH16019_20161109_PA10_09A	M	X	R	-0.187309	0.0504032	0.0504032	0.169259	0.0504032	0.0504032	0.288115	-0.425021	-0.425021	-0.306165	-0.0684527	0.169259	-0.0684527	-0.0684527	-0.0684527	-0.306165	0.288115	-0.187309	0.288115	-0.0684527	-0.425021	0.169259	-0.425021	-0.306165	-0.0684527	0.169259	-0.0684527	-0.0684527	0.0504032	0.0504032	-0.187309	0.288115	0.288115	0.0504032	-0.187309	-0.0684527	-0.187309	-0.187309	-0.306165	-0.0684527
CDH16019_20161109_PA10_17A	M		R	0.196423	0.196423	0.443994	0.196423	0.36147	0.609042	0.196423	0.443994	0.196423	0.196423	0.0313756	0.0313756	0.113899	0.113899	-0.0511482	0.113899	-0.216196	-0.133672	-0.216196	-0.133672	0.443994	-0.298719	0.36147	0.526518	0.113899	0.609042	0.443994	0.774089	0.526518	0.443994	0.113899	0.196423	-0.133672	-0.0511482	0.443994	0.36147	-0.0511482	-0.216196	0.113899	0.0313756
CDH16019_20161109_PA10_21A	M		R	0.385343	0.178215	-0.23604	-0.0289126	-0.23604	0.799598	-0.0289126	-0.0289126	-0.0289126	-0.23604	-0.0289126	-0.0289126	0.178215	0.178215	-0.0289126	-0.23604	-0.0289126	0.178215	-0.0289126	-0.23604	-0.23604	-0.0289126	-0.0289126	-0.0289126	0.385343	0.178215	0.178215	-0.23604	-0.0289126	-0.23604	-0.23604	-0.23604	-0.0289126	-0.23604	-0.23604	-0.0289126	-0.23604	-0.0289126	0.178215	0.178215
EMR17002_20170707_PA10_01A	F	X	L	0.359392	-0.0605723	0.359392	-0.0605723	-0.270555	0.779357	-0.0605723	-0.0605723	0.14941	0.359392	0.569375	0.779357	0.569375	-0.270555	-0.0605723	0.14941	0.569375	-0.270555	0.569375	0.989339	0.779357	0.989339	0.989339	-0.480537	0.359392	0.14941	0.359392	0.569375	0.569375	0.14941	-0.0605723	0.359392	0.779357	0.359392	-0.0605723	-0.270555	-0.270555	0.569375	-0.270555	0.14941
EMR17002_20170707_PA10_03A	F		L	-0.0472636	0.261819	-0.0472636	-0.0472636	-0.0472636	0.879983	-0.0472636	0.570901	0.570901	-0.356346	0.570901	-0.356346	0.879983	0.261819	-0.0472636	0.261819	-0.356346	0.261819	0.570901	-0.0472636	0.261819	0.570901	1.49815	0.570901	-0.356346	-0.356346	-0.0472636	-0.0472636	1.49815	0.570901	0.261819	-0.0472636	0.570901	0.879983	-0.0472636	0.570901	-0.356346	0.570901	-0.0472636	0.261819
EMR17002_20170707_PA10_05A	F	X	L	-0.0431642	-0.330843	-0.330843	-0.0431642	0.244514	0.532193	0.244514	-0.187003	0.100675	0.100675	-0.0431642	-0.330843	-0.330843	-0.187003	-0.474682	-0.474682	-0.0431642	-0.330843	-0.474682	-0.187003	1.10755	0.676032	1.25139	1.82675	1.25139	1.53907	1.10755	1.53907	1.25139	1.25139	1.25139	2.4021	1.82675	1.68291	2.4021	1.25139	1.68291	1.97059	0.963711	1.10755
EMR17002_20170707_PA10_07A	F		L	-0.154607	-0.29165	-0.0860858	-0.360171	-0.0860858	-0.0860858	0.325042	0.804691	0.393563	0.0509568	1.07878	0.667648	0.530606	0.393563	0.599127	0.530606	0.941734	0.804691	0.256521	0.73617	0.256521	-0.0175645	-0.0860858	0.187999	0.73617	-0.0175645	0.256521	0.667648	0.256521	-0.223128	0.393563	0.462085	0.119478	-0.223128	0.119478	-0.154607	-0.154607	1.07878	0.73617	0.0509568
EMR17002_20170707_PA10_09A	F		L	0.0571054	0.504806	0.952506	-0.166745	1.62406	0.504806	1.84791	0.280955	0.728656	0.728656	0.952506	0.0571054	0.728656	0.0571054	-0.166745	-0.390595	-0.166745	-0.166745	0.0571054	0.0571054	0.280955	-0.390595	-0.166745	-0.166745	-0.166745	0.0571054	0.280955	-0.390595	0.0571054	-0.390595	0.280955	-0.166745	-0.390595	0.504806	-0.166745	0.0571054	-0.166745	0.280955	-0.166745	0.0571054
EMR17002_20170707_PA10_09B	F		L	-0.273296	-0.273296	-0.505624	-0.273296	-0.505624	-0.505624	-0.505624	-0.505624	-0.505624	-0.505624	-0.273296	-0.505624	-0.0409675	-0.273296	-0.505624	-0.505624	-0.273296	-0.505624	0.656017	-0.0409675	-0.505624	0.191361	0.423689	-0.0409675	-0.0409675	-0.505624	-0.0409675	-0.505624	0.423689	-0.505624	0.191361	0.191361	-0.273296	-0.505624	-0.505624	-0.273296	-0.273296	-0.273296	-0.273296	-0.273296
EMR17002_20170707_PA10_11A	F		L	-0.492937	-0.362607	-0.362607	0.0283837	0.0283837	-0.232277	-0.232277	0.0283837	-0.232277	-0.101947	0.289044	0.549705	0.289044	-0.492937	0.289044	-0.362607	-0.492937	-0.492937	0.158714	-0.492937	-0.492937	-0.232277	-0.362607	-0.101947	-0.492937	0.158714	-0.101947	0.810365	0.158714	0.549705	0.680035	1.98334	1.20136	1.85301	1.46202	0.419375	0.158714	0.158714	0.158714	0.810365
EMR17002_20170707_PA10_13A	F		L	-0.311281	1.06514	0.376927	-0.311281	-0.311281	0.376927	-0.311281	0.376927	0.0328231	-0.311281	-0.311281	1.06514	0.376927	0.376927	0.721032	0.0328231	0.376927	0.721032	0.0328231	-0.311281	0.0328231	0.721032	1.06514	1.06514	0.0328231	0.0328231	0.376927	0.0328231	-0.311281	-0.311281	0.376927	-0.311281	0.376927	-0.311281	0.0328231	-0.311281	0.0328231	0.0328231	0.376927	-0.311281
EMR17002_20170707_PA10_19A	F		L	0.107805	-0.15605	0.37166	0.37166	0.37166	0.107805	0.635515	-0.419906	0.107805	0.107805	0.107805	0.635515	0.107805	-0.15605	0.37166	-0.419906	-0.15605	-0.419906	0.37166	0.37166	0.37166	1.16323	-0.419906	0.89937	0.37166	0.635515	0.107805	0.37166	1.95479	0.37166	0.635515	0.107805	-0.15605	-0.419906	-0.15605	0.107805	-0.15605	-0.15605	-0.15605	-0.419906
EMR17002_20170707_PA10_21A	F		L	-0.191267	0.387392	-0.191267	-0.191267	-0.191267	-0.191267	-0.191267	0.387392	0.387392	0.387392	-0.191267	-0.191267	-0.191267	0.387392	-0.191267	-0.191267	0.966051	-0.191267	-0.191267	-0.191267	-0.191267	-0.191267	-0.191267	-0.191267	-0.191267	-0.191267	-0.191267	0.387392	-0.191267	-0.191267	0.966051	-0.191267	-0.191267	-0.191267	0.387392	0.966051	0.387392	-0.191267	0.387392	-0.191267
EMR17002_20170707_PA10_23A	F		L	0.592473	0.254894	0.0861049	0.761263	0.930052	1.26763	0.423684	0.761263	-0.0826845	0.0861049	0.930052	0.423684	0.423684	0.592473	1.43642	0.0861049	0.423684	-0.0826845	-0.0826845	0.423684	-0.0826845	0.254894	0.592473	0.254894	0.0861049	-0.0826845	-0.0826845	0.254894	-0.251474	-0.0826845	0.0861049	-0.0826845	0.0861049	0.0861049	0.423684	0.423684	0.423684	0.423684	-0.251474	-0.420263
EMR17002_20170707_PA10_23B	F	X	L	0.0121756	0.326335	0.954653	0.954653	0.0121756	0.326335	0.326335	-0.301984	0.0121756	0.0121756	0.640494	-0.301984	0.0121756	0.326335	0.326335	0.326335	0.954653	0.640494	-0.301984	0.326335	0.640494	0.326335	1.26881	0.640494	-0.301984	0.0121756	0.326335	0.640494	0.326335	1.89713	0.954653	0.640494	1.26881	0.640494	0.640494	1.26881	1.58297	1.58297	1.26881	0.640494
EMR17002_20170707_PA10_27A	F		L	-0.167444	-0.167444	-0.167444	-0.167444	0.494428	-0.167444	-0.167444	-0.167444	-0.167444	-0.167444	-0.167444	-0.167444	-0.167444	0.494428	-0.167444	0.494428	-0.167444	-0.167444	-0.167444	-0.167444	0.494428	0.494428	0.494428	-0.167444	-0.167444	0.494428	-0.167444	-0.167444	0.494428	-0.167444	0.494428	-0.167444	-0.167444	-0.167444	-0.167444	-0.167444	0.494428	-0.167444	-0.167444	-0.167444
EMR17002_20170707_PA10_31A	F	X	L	1.32766	0.928843	1.32766	0.530022	1.32766	-0.267619	0.530022	-0.267619	-0.267619	0.530022	0.530022	0.530022	-0.267619	0.131201	0.131201	0.131201	0.530022	-0.267619	0.928843	0.530022	-0.267619	-0.267619	1.32766	0.928843	0.928843	-0.267619	0.530022	0.131201	0.530022	0.530022	0.131201	-0.267619	0.131201	0.131201	-0.267619	0.530022	-0.267619	-0.267619	0.530022	0.131201
EMR17002_20170707_PA10_31B	F			-0.222238	-0.222238	-0.222238	-0.222238	-0.222238	-0.222238	-0.222238	-0.222238	-0.222238	-0.222238	-0.222238	-0.222238	-0.222238	-0.222238	-0.222238	-0.222238	-0.222238	-0.222238	-0.222238	-0.222238	0.118278	-0.222238	-0.222238	-0.222238	-0.222238	-0.222238	-0.222238	-0.222238	-0.222238	-0.222238	-0.222238	-0.222238	-0.222238	-0.222238	-0.222238	-0.222238	-0.222238	-0.222238	-0.222238	-0.222238
EMR17004_20170703_PA10_03A	F		R	-0.216291	-0.216291	-0.216291	-0.216291	-0.216291	-0.216291	-0.216291	-0.216291	-0.216291	-0.216291	-0.216291	-0.216291	-0.216291	-0.216291	-0.216291	-0.216291	-0.216291	-0.216291	-0.216291	-0.216291	-0.216291	-0.216291	-0.216291	-0.216291	-0.216291	-0.216291	-0.216291	-0.216291	-0.216291	-0.216291	-0.216291	-0.216291	-0.216291	-0.216291	-0.216291	-0.216291	-0.216291	-0.216291	-0.216291	-0.216291
EMR17004_20170703_PA10_03B	F		L	-0.200084	-0.200084	0.0762305	-0.476398	-0.200084	-0.200084	-0.200084	-0.476398	0.0762305	-0.476398	0.0762305	-0.476398	0.0762305	-0.200084	-0.200084	-0.200084	-0.476398	-0.476398	-0.200084	-0.200084	-0.200084	-0.476398	0.352545	0.0762305	-0.200084	0.0762305	-0.476398	-0.476398	0.0762305	-0.200084	0.352545	-0.476398	-0.200084	-0.476398	0.352545	-0.200084	-0.476398	0.352545	-0.200084	-0.476398
EMR17004_20170703_PA10_11A	F		L	0.588156	0.166885	-0.254385	0.166885	-0.254385	-0.254385	-0.254385	-0.254385	0.588156	0.166885	0.166885	0.166885	1.00943	0.166885	-0.254385	0.166885	0.588156	0.166885	0.166885	0.588156	0.166885	0.588156	0.166885	0.166885	1.00943	-0.254385	0.588156	0.166885	1.00943	0.588156	0.588156	1.85197	1.4307	0.588156	-0.254385	-0.254385	-0.254385	0.166885	-0.254385	0.588156
EMR17004_20170703_PA10_11B	F		L	-0.244186	-0.046357	-0.244186	0.151472	-0.244186	-0.244186	0.151472	-0.244186	-0.244186	-0.442014	0.151472	-0.244186	-0.442014	-0.244186	-0.442014	-0.442014	-0.639843	-0.046357	-0.244186	0.942786	-0.244186	0.151472	-0.046357	-0.244186	-0.442014	-0.442014	-0.442014	-0.442014	-0.639843	0.151472	0.151472	-0.442014	-0.244186	-0.442014	-0.442014	-0.442014	-0.046357	-0.244186	-0.244186	-0.442014
EMR17004_20170703_PA10_13A	F		L	-0.0762263	-0.0762263	-0.0762263	0.224986	-0.0762263	0.224986	0.526198	0.526198	-0.377439	-0.0762263	1.12862	-0.0762263	-0.377439	-0.0762263	-0.0762263	-0.377439	-0.0762263	-0.0762263	-0.377439	0.526198	-0.0762263	-0.377439	-0.377439	0.224986	-0.0762263	-0.377439	-0.377439	-0.0762263	-0.0762263	-0.0762263	-0.0762263	0.526198	-0.0762263	0.526198	0.224986	-0.377439	-0.377439	-0.377439	-0.0762263	0.526198
EMR17004_20170703_PA10_17A	F	X	L	0.656531	0.656531	0.375767	0.656531	0.0950019	1.77959	0.0950019	1.21806	1.49883	0.656531	0.0950019	-0.466527	0.375767	0.656531	0.0950019	0.375767	0.0950019	0.0950019	1.21806	1.49883	0.375767	1.21806	0.656531	0.375767	0.937296	0.0950019	0.0950019	0.937296	-0.185763	0.937296	-0.185763	-0.185763	-0.185763	0.375767	0.0950019	0.656531	0.375767	-0.466527	-0.185763	0.375767
EMR17004_20170703_PA10_17B	F		L	-0.0045262	0.657482	-0.33553	-0.33553	-0.33553	0.988486	-0.0045262	-0.33553	-0.33553	-0.33553	-0.0045262	0.326478	-0.0045262	-0.0045262	0.657482	-0.33553	0.326478	-0.0045262	0.326478	-0.0045262	-0.33553	-0.33553	0.657482	-0.33553	-0.33553	0.326478	0.326478	0.657482	0.657482	0.988486	0.988486	0.988486	-0.0045262	-0.0045262	-0.0045262	-0.0045262	-0.33553	-0.33553	0.657482	-0.0045262
EMR17006_20170717_PA10_01A	M	X	R	0.106329	0.106329	0.106329	0.106329	0.106329	0.106329	0.106329	-0.172728	-0.172728	-0.172728	0.106329	0.106329	0.385386	-0.172728	-0.172728	0.385386	-0.172728	-0.172728	0.385386	-0.172728	-0.172728	-0.172728	-0.172728	-0.172728	-0.172728	-0.172728	-0.172728	-0.172728	-0.172728	0.106329	0.106329	-0.172728	0.385386	0.385386	-0.172728	0.385386	0.664443	0.106329	0.106329	-0.172728
EMR17006_20170717_PA10_03A	M		R	-0.444472	-0.444472	-0.444472	-0.444472	-0.444472	-0.444472	-0.444472	-0.444472	-0.331495	-0.444472	-0.444472	-0.444472	-0.444472	-0.444472	-0.444472	-0.444472	-0.444472	-0.444472	-0.444472	-0.444472	-0.444472	-0.444472	-0.444472	-0.444472	-0.444472	-0.444472	-0.444472	-0.444472	-0.444472	-0.444472	-0.444472	-0.444472	-0.444472	-0.444472	-0.444472	-0.444472	-0.444472	-0.444472	-0.444472	-0.444472
EMR17006_20170717_PA10_03B	M		R	-0.19128	0.0815632	-0.19128	0.217985	-0.0548582	0.0815632	-0.19128	-0.19128	-0.0548582	-0.19128	-0.19128	-0.0548582	0.0815632	0.0815632	-0.327701	-0.19128	0.0815632	-0.19128	-0.0548582	-0.327701	-0.0548582	-0.327701	-0.19128	-0.19128	-0.19128	-0.327701	-0.327701	-0.0548582	-0.327701	-0.327701	-0.0548582	-0.19128	-0.19128	-0.0548582	-0.0548582	-0.19128	-0.19128	-0.327701	0.354406	-0.19128
EMR17006_20170717_PA10_05A	M		L	-0.411963	-0.411963	-0.494136	-0.32979	-0.32979	-0.32979	-0.494136	-0.411963	-0.32979	-0.247617	-0.494136	-0.165444	-0.494136	-0.247617	0.0810745	-0.0832712	-0.32979	-0.247617	-0.0832712	-0.494136	-0.247617	-0.494136	-0.247617	-0.411963	-0.32979	-0.32979	-0.411963	-0.32979	-0.32979	-0.411963	-0.247617	-0.494136	0.163247	-0.0832712	-0.00109834	-0.165444	-0.32979	-0.247617	-0.247617	-0.494136
EMR17006_20170717_PA10_07A	M	X	R	0.807951	0.308725	0.308725	0.0591117	0.308725	-0.190501	-0.190501	-0.190501	0.0591117	0.0591117	0.0591117	-0.190501	-0.190501	-0.190501	-0.190501	0.0591117	-0.190501	1.05756	0.308725	-0.190501	0.0591117	0.0591117	-0.190501	0.0591117	0.0591117	0.0591117	0.0591117	0.558338	0.0591117	0.0591117	0.0591117	-0.190501	0.558338	0.308725	0.0591117	0.308725	0.558338	0.0591117	0.0591117	0.0591117
EMR17006_20170717_PA10_09A	M	X	R	0.861843	1.06256	0.962203	1.06256	0.861843	1.06256	0.661123	0.661123	0.460402	0.661123	0.861843	1.06256	-0.0413986	0.259682	0.0589616	0.560763	0.360042	0.259682	0.861843	-0.0413986	0.861843	0.761483	0.460402	1.36364	1.26328	1.66472	1.96581	1.66472	1.56436	1.76508	1.86545	2.56797	3.47121	1.96581	1.86545	2.26689	2.56797	1.86545	1.26328	1.36364
EMR17006_20170717_PA10_09B	M	X	R	0.630379	0.0917758	0.450844	0.0917758	0.450844	-0.267293	0.27131	0.450844	-0.267293	0.0917758	-0.0877585	0.0917758	0.27131	-0.0877585	-0.267293	-0.267293	0.27131	-0.0877585	-0.0877585	0.630379	-0.0877585	0.27131	-0.0877585	0.27131	0.809913	0.630379	0.450844	0.27131	0.0917758	0.450844	0.27131	0.0917758	0.989447	1.70758	0.809913	1.34852	0.450844	0.809913	0.809913	0.0917758
EMR17006_20170717_PA10_11A	M		R	-0.188536	-0.0334394	-0.188536	-0.188536	-0.188536	-0.188536	-0.188536	-0.188536	-0.188536	-0.188536	-0.188536	-0.188536	-0.188536	-0.188536	-0.188536	-0.188536	-0.188536	-0.188536	-0.188536	-0.188536	-0.188536	-0.188536	-0.188536	-0.188536	-0.188536	-0.188536	-0.188536	-0.188536	-0.188536	-0.188536	-0.188536	-0.0334394	-0.0334394	-0.188536	0.121658	-0.0334394	-0.188536	-0.188536	0.276755	-0.0334394
EMR17006_20170717_PA10_11B	M		R	-0.398128	-0.637019	-0.637019	-0.637019	-0.477758	-0.398128	-0.477758	-0.637019	-0.557388	-0.637019	-0.557388	-0.637019	-0.557388	-0.477758	-0.398128	-0.557388	-0.637019	-0.557388	-0.557388	-0.637019	-0.557388	-0.557388	-0.557388	-0.637019	-0.557388	-0.637019	-0.637019	-0.398128	-0.557388	-0.477758	-0.637019	-0.477758	-0.477758	-0.557388	-0.637019	-0.637019	-0.637019	-0.557388	-0.557388	-0.557388
EMR17006_20170717_PA10_11C	M	X	R	-0.386039	-0.465326	-0.227465	-0.465326	-0.386039	-0.227465	-0.227465	-0.227465	-0.306752	-0.386039	-0.306752	-0.148177	-0.148177	-0.148177	-0.148177	-0.148177	-0.544613	-0.0688903	-0.544613	-0.306752	-0.227465	-0.465326	-0.544613	-0.544613	-0.465326	-0.544613	-0.544613	-0.386039	-0.544613	-0.465326	-0.465326	-0.306752	-0.386039	-0.0688903	-0.148177	-0.227465	-0.227465	-0.386039	-0.544613	-0.544613
EMR17006_20170717_PA10_11D	M	X	R	0.672976	0.404804	0.53889	1.3881	0.985844	1.20932	1.47749	1.83506	1.79036	2.14792	2.14792	2.10323	1.79036	1.61158	1.52219	0.851758	1.03054	0.672976	0.628281	0.315413	0.494195	0.0472412	-0.13154	-0.265626	-0.176236	-0.0421495	-0.176236	-0.0421495	-0.0421495	-0.13154	-0.265626	0.494195	0.181327	0.226023	0.449499	0.583586	0.896453	0.851758	0.717672	0.53889
EMR17006_20170717_PA10_13A	M		R	0.0233221	0.20421	0.385098	0.113766	0.113766	0.20421	-0.338454	-0.0671218	-0.0671218	-0.24801	0.0233221	0.565986	0.475542	-0.0671218	-0.0671218	-0.157566	-0.24801	-0.0671218	-0.0671218	-0.157566	-0.338454	-0.338454	-0.157566	-0.0671218	-0.0671218	-0.24801	-0.338454	-0.338454	-0.338454	-0.338454	-0.24801	-0.157566	0.113766	0.927761	0.927761	1.28954	2.82708	2.01309	1.8322	1.56087
EMR17006_20170717_PA10_15A	M	X	R	0.417787	0.261174	0.691859	0.143715	0.574399	0.496093	0.965931	0.33948	0.33948	0.613553	0.496093	0.535246	0.691859	0.926778	0.104562	0.417787	0.182868	-0.208664	-0.0128979	0.45694	0.182868	-0.130357	0.104562	0.496093	0.222021	0.0654084	0.182868	0.104562	0.0654084	0.300327	0.770165	0.809318	0.887625	0.613553	0.496093	0.261174	0.0654084	0.496093	0.222021	0.33948
EMR17006_20170717_PA10_15B	M	X	R	-0.467373	0.239187	-0.396717	-0.114093	-0.0434372	-0.184749	-0.114093	-0.255405	-0.467373	-0.184749	-0.538029	-0.396717	-0.255405	-0.467373	-0.467373	-0.396717	-0.608685	-0.467373	-0.326061	-0.326061	-0.538029	-0.326061	-0.538029	-0.538029	-0.679341	-0.538029	-0.608685	-0.538029	-0.679341	-0.608685	-0.679341	-0.255405	-0.538029	-0.538029	-0.608685	-0.538029	-0.608685	-0.396717	-0.396717	-0.467373
EMR17006_20170717_PA10_15C	M	X	L	0.0626498	-0.300685	-0.35259	-0.4564	-0.404495	-0.196875	-0.56021	-0.56021	-0.300685	-0.196875	-0.56021	-0.0930651	-0.56021	-0.508305	-0.196875	-0.300685	0.374079	-0.0411601	0.633604	0.477889	0.737414	0.996939	1.10075	0.789319	1.25646	0.996939	1.41218	1.04884	0.945034	0.374079	0.529794	0.0626498	0.16646	0.27027	0.322175	0.581699	0.114555	0.0107448	0.0626498	-0.14497
EMR17006_20170717_PA10_17A	M	X	R	-0.0831756	-0.0831756	-0.0831756	0.0245044	0.347544	0.239864	0.562905	0.0245044	-0.190856	-0.0831756	-0.190856	-0.0831756	0.0245044	0.0245044	-0.298536	0.239864	0.455224	0.0245044	0.455224	0.885945	0.0245044	-0.0831756	0.670585	0.0245044	0.132184	0.239864	0.562905	0.670585	0.0245044	-0.190856	-0.0831756	-0.190856	0.0245044	-0.190856	-0.190856	0.239864	-0.0831756	0.0245044	-0.0831756	0.132184
EMR17006_20170717_PA10_17B	M		R	-0.0158985	-0.230567	-0.0158985	-0.230567	-0.230567	-0.230567	0.19877	-0.0158985	-0.230567	0.19877	-0.230567	-0.230567	0.19877	-0.0158985	-0.0158985	-0.0158985	0.19877	-0.230567	0.628107	-0.230567	-0.0158985	-0.0158985	0.19877	-0.0158985	0.19877	-0.0158985	0.628107	-0.0158985	-0.230567	-0.0158985	-0.0158985	-0.230567	-0.230567	-0.230567	-0.230567	-0.0158985	0.19877	-0.0158985	0.19877	-0.230567
EMR17006_20170717_PA10_19A	M	X	R	-0.462585	-0.511034	-0.559484	-0.559484	-0.511034	-0.365685	-0.462585	-0.317235	-0.511034	-0.511034	-0.511034	-0.559484	-0.511034	-0.559484	-0.511034	-0.414135	-0.559484	-0.559484	-0.511034	-0.317235	-0.462585	-0.559484	-0.462585	-0.462585	-0.559484	-0.511034	-0.511034	-0.462585	-0.559484	-0.559484	-0.559484	-0.511034	-0.559484	-0.559484	-0.559484	-0.559484	-0.559484	-0.559484	-0.559484	-0.559484
EMR17006_20170717_PA10_19B	M	X	R	0.619501	1.25016	0.19906	0.19906	1.46038	0.619501	0.829722	0.619501	0.409281	0.19906	-0.0111607	-0.221381	0.19906	0.19906	0.409281	-0.0111607	-0.0111607	-0.0111607	0.19906	0.409281	0.19906	-0.221381	0.19906	-0.221381	-0.221381	-0.221381	-0.0111607	0.409281	0.409281	-0.0111607	0.19906	-0.221381	0.19906	-0.0111607	0.619501	2.09105	1.6706	1.46038	2.93193	1.03994
EMR17006_20170717_PA10_23A	M		R	-0.208747	-0.589225	-0.208747	-0.589225	-0.589225	-0.684344	-0.351426	-0.779463	-0.398986	-0.446546	-0.494105	-0.731904	-0.398986	-0.541665	-0.779463	-0.113628	-0.446546	-0.161188	-0.303867	0.0290509	-0.636784	-0.0185088	-0.256307	-0.398986	-0.398986	-0.161188	-0.208747	-0.494105	-0.303867	-0.636784	-0.636784	-0.446546	-0.256307	-0.208747	-0.0660684	-0.113628	-0.0185088	-0.351426	-0.446546	-0.208747
EMR17006_20170717_PA10_25A	M	X	L	0.164443	0.725192	1.56631	1.56631	1.7065	1.00557	1.56631	1.7065	1.42613	2.26725	1.14575	1.84669	1.14575	1.84669	2.40744	2.40744	1.14575	1.14575	1.84669	0.585005	0.444818	0.585005	0.164443	0.304631	0.304631	-0.115931	-0.256118	-0.115931	-0.115931	0.164443	0.0242563	0.0242563	0.164443	-0.256118	-0.115931	-0.256118	-0.256118	0.0242563	0.164443	0.0242563
EMR17006_20170717_PA10_27A	M	X	L	-0.596696	-0.552827	-0.640565	-0.465089	-0.684434	-0.772172	-0.859909	-0.640565	-0.465089	-0.158006	-0.465089	-0.465089	-0.596696	-0.377351	-0.377351	-0.114137	-0.201875	-0.0702684	-0.289613	-0.552827	-0.465089	-0.465089	-0.42122	-0.552827	-0.552827	-0.596696	-0.772172	-0.81604	-0.772172	-0.859909	-0.859909	-0.947647	-0.81604	-0.859909	-0.903778	-0.859909	-0.81604	-0.772172	-0.81604	-0.640565
EMR17006_20170717_PA10_27B	M		R	0.0719648	-0.135875	-0.135875	-0.135875	-0.135875	0.0719648	-0.135875	-0.135875	-0.135875	-0.135875	0.279804	0.279804	0.279804	0.279804	-0.135875	-0.135875	0.0719648	-0.135875	-0.135875	-0.135875	-0.135875	0.0719648	-0.135875	-0.135875	-0.135875	-0.135875	-0.135875	-0.135875	-0.135875	-0.135875	-0.135875	-0.135875	-0.135875	-0.135875	-0.135875	0.0719648	-0.135875	0.0719648	-0.135875	-0.135875
EMR17007_20170622_PA10_01A	M	X	R	0.138006	0.138006	0.307754	0.420919	0.0814229	0.138006	0.138006	0.364336	0.534084	0.703832	0.194588	0.0814229	0.0814229	0.307754	0.420919	0.0248402	0.0814229	0.138006	0.420919	0.364336	-0.144908	0.0248402	-0.0883251	-0.20149	0.0248402	-0.144908	-0.144908	-0.0883251	-0.0883251	0.251171	0.251171	0.0248402	0.194588	-0.0317424	0.138006	0.194588	-0.0883251	-0.0317424	0.0248402	0.534084
EMR17007_20170622_PA10_03A	M	X	L	-0.35171	-0.25533	-0.49628	-0.30352	-0.25533	-0.44809	-0.20714	-0.0625698	-0.30352	-0.0143798	-0.3999	-0.35171	-0.3999	-0.54447	-0.25533	-0.54447	-0.25533	-0.54447	-0.44809	0.0338102	-0.640849	-0.15895	-0.3999	-0.49628	-0.737229	-0.15895	-0.30352	-0.44809	-0.30352	-0.54447	-0.3999	-0.35171	-0.30352	-0.640849	-0.44809	-0.54447	-0.49628	-0.44809	-0.3999	-0.592659
EMR17007_20170622_PA10_03B	M	X	L	-0.200493	-0.200493	-0.0377066	0.0436865	0.206473	0.12508	-0.0377066	0.369259	0.287866	0.206473	0.287866	0.206473	0.12508	-0.0377066	-0.1191	0.287866	-0.1191	0.206473	-0.0377066	0.206473	-0.281886	-0.200493	-0.363279	-0.363279	-0.200493	0.0436865	0.12508	-0.1191	-0.1191	-0.200493	-0.200493	-0.526065	-0.363279	-0.200493	-0.0377066	-0.444672	-0.526065	-0.363279	-0.0377066	0.0436865
EMR17007_20170622_PA10_05A	M		L	-0.316576	-0.138702	0.0391714	-0.316576	-0.227639	-0.227639	-0.138702	0.0391714	-0.138702	-0.227639	-0.138702	-0.138702	-0.316576	0.0391714	-0.227639	-0.227639	-0.405513	-0.138702	-0.316576	-0.227639	0.0391714	0.0391714	0.0391714	0.0391714	-0.0497654	-0.0497654	-0.0497654	-0.138702	-0.138702	-0.0497654	0.128108	-0.316576	-0.227639	-0.0497654	-0.316576	-0.316576	-0.316576	0.0391714	-0.227639	-0.0497654
EMR17007_20170622_PA10_05B	M		L	-0.140522	-0.140522	-0.140522	0.0870643	-0.254315	0.428443	-0.140522	0.0870643	-0.254315	0.31465	-0.0267287	0.31465	-0.254315	-0.0267287	-0.140522	-0.254315	0.200857	-0.140522	-0.0267287	0.31465	-0.140522	0.31465	-0.140522	-0.140522	0.31465	0.31465	0.0870643	0.0870643	0.31465	-0.254315	-0.140522	-0.0267287	0.0870643	-0.254315	0.200857	0.428443	-0.140522	-0.0267287	-0.140522	-0.254315
EMR17007_20170622_PA10_07A	M		R	0.228888	0.487364	0.271968	0.702759	0.702759	0.444284	0.444284	0.530443	0.788918	0.961235	0.530443	0.530443	1.00431	0.444284	0.65968	0.14273	0.271968	-0.201903	-0.503458	-0.0726658	-0.158824	-0.244983	-0.288062	-0.503458	-0.244983	-0.503458	-0.546537	-0.115745	-0.201903	-0.115745	-0.244983	-0.37422	0.271968	0.315047	0.401205	0.65968	1.21971	1.09047	0.961235	0.788918
EMR17007_20170622_PA10_09A	M	X	R	-0.0351361	0.0381386	0.221325	0.221325	-0.0717735	0.514424	0.697611	0.00150128	0.404512	0.074776	0.074776	0.0381386	0.148051	0.587699	-0.108411	-0.108411	0.404512	0.148051	-0.218323	0.148051	0.111413	0.221325	0.00150128	0.551062	0.660974	0.221325	0.514424	0.44115	0.148051	0.184688	-0.218323	-0.0717735	-0.218323	0.074776	0.074776	0.367875	0.0381386	-0.0351361	0.221325	0.257963
EMR17007_20170622_PA10_09B	M	X	R	0.139764	0.457799	0.503232	0.00346359	0.321498	0.276065	0.139764	0.366932	0.321498	0.00346359	0.457799	0.457799	0.185198	-0.132837	0.00346359	-0.178271	0.185198	0.0943306	-0.314571	-0.314571	-0.223704	-0.314571	-0.223704	-0.223704	-0.132837	-0.269138	-0.132837	-0.132837	-0.223704	0.0488971	0.185198	0.321498	0.503232	0.684966	0.957568	-0.0419699	-0.0419699	0.139764	0.321498	0.0943306
EMR17007_20170622_PA10_11A	M		R	0.364015	-0.213127	0.147587	-0.0688415	0.21973	0.291872	0.291872	0.291872	0.21973	0.21973	0.00330131	-0.213127	0.436158	0.147587	0.0754441	-0.213127	0.21973	-0.0688415	-0.357413	0.00330131	0.147587	0.0754441	-0.0688415	-0.213127	-0.0688415	-0.213127	0.147587	-0.0688415	-0.0688415	0.364015	0.147587	0.291872	0.147587	0.0754441	0.364015	0.364015	0.00330131	0.436158	0.147587	0.291872
EMR17007_20170622_PA10_11B	M	X	R	0.275726	0.220253	0.275726	0.553095	0.164779	0.386674	0.719516	0.0538315	0.275726	0.164779	0.109305	0.275726	0.497621	0.442148	0.442148	0.220253	0.275726	-0.11259	-0.0571159	-0.223537	-0.279011	-0.0571159	0.109305	0.0538315	0.386674	0.220253	-0.168063	-0.223537	-0.334485	0.442148	0.0538315	-0.0016422	-0.168063	-0.168063	-0.0016422	-0.11259	0.3312	0.386674	0.3312	0.386674
EMR17007_20170622_PA10_17A	M		L	-0.233157	0.243992	0.148562	-0.0422977	0.243992	0.339422	-0.137727	-0.0422977	0.625711	-0.328587	0.530281	0.148562	0.148562	-0.0422977	-0.233157	-0.137727	-0.137727	-0.233157	0.339422	-0.137727	-0.233157	-0.233157	-0.0422977	0.148562	-0.0422977	-0.0422977	0.0531321	0.721141	0.0531321	-0.233157	-0.328587	0.0531321	-0.0422977	0.434851	-0.233157	0.0531321	0.148562	-0.0422977	-0.0422977	-0.137727
EMR17007_20170622_PA10_17B	M		R	0.211859	-0.132635	-0.247466	0.441522	-0.0178036	-0.0178036	0.0970278	0.0970278	0.0970278	0.32669	0.0970278	-0.0178036	-0.0178036	0.0970278	0.0970278	-0.0178036	-0.132635	0.0970278	-0.132635	-0.247466	-0.0178036	0.0970278	-0.0178036	-0.0178036	0.211859	-0.132635	0.0970278	-0.132635	-0.132635	-0.132635	-0.247466	0.0970278	-0.0178036	-0.0178036	-0.0178036	0.32669	0.211859	0.556353	-0.0178036	1.24534
EMR17007_20170622_PA10_23A	M	X	R	-0.0319912	0.0929892	0.0617441	0.249215	0.186725	0.124234	0.21797	-0.156972	-0.0944815	0.34295	-0.281952	0.530421	0.0929892	0.0617441	-0.0632364	0.124234	0.155479	0.0617441	0.0929892	-0.156972	0.467931	0.467931	0.624156	0.436685	0.686646	-0.125727	-0.500668	-0.313197	-0.125727	-0.313197	-0.0944815	-0.156972	-0.375687	-0.594403	-0.375687	-0.125727	-0.156972	-0.281952	-0.219462	-0.156972
EMR17007_20170622_PA10_23B	M	X	R	-0.22927	0.56733	0.16903	-0.0301202	-0.0301202	-0.0301202	0.268605	0.16903	-0.0301202	-0.328845	0.0694549	-0.328845	-0.22927	-0.0301202	0.268605	-0.0301202	-0.328845	-0.0301202	-0.0301202	-0.328845	0.0694549	0.16903	-0.129695	0.16903	0.467755	0.56733	0.16903	-0.0301202	-0.22927	-0.129695	0.0694549	0.0694549	-0.22927	-0.0301202	-0.0301202	-0.22927	-0.22927	-0.328845	0.16903	0.16903
EMR17007_20170622_PA10_27A	M	X	L	0.089457	0.157844	0.089457	-0.184091	-0.184091	-0.252478	0.089457	0.089457	0.157844	0.02107	-0.0473169	-0.0473169	-0.320865	-0.0473169	-0.115704	-0.252478	-0.320865	-0.184091	-0.320865	0.226231	-0.115704	0.226231	0.363005	0.773326	0.363005	0.704939	1.52558	1.79913	1.59397	1.52558	1.79913	1.52558	0.431392	0.636552	0.363005	0.089457	-0.0473169	0.089457	0.089457	0.089457
EMR17007_20170622_PA10_27B	M	X	R	0.247751	0.247751	0.375425	0.566936	0.311588	-0.0714345	0.439262	0.566936	0.503099	0.69461	0.758447	0.120077	0.311588	0.949959	0.69461	0.503099	0.120077	0.0562396	0.120077	-0.0714345	-0.0714345	0.120077	0.503099	0.120077	1.0138	0.375425	-0.00759744	0.120077	-0.262946	-0.262946	-0.262946	-0.00759744	0.375425	0.0562396	0.311588	0.949959	1.39682	1.33298	2.16286	1.97135
EMR17007_20170622_PA10_27C	M	X	R	0.157543	0.25226	0.0628263	0.25226	0.631127	-0.0318905	-0.221324	0.346977	0.157543	0.25226	0.25226	0.346977	0.346977	0.0628263	-0.126607	0.0628263	-0.126607	-0.126607	-0.126607	-0.126607	-0.0318905	-0.126607	-0.126607	-0.316041	-0.0318905	0.0628263	-0.316041	-0.221324	-0.316041	0.0628263	-0.0318905	0.0628263	0.157543	0.25226	0.346977	-0.0318905	-0.0318905	0.0628263	0.0628263	0.25226
EMR17008_20170718_PA10_01A	M		R	-0.261607	-0.0669534	0.906317	-0.456261	0.127701	0.322355	-0.0669534	-0.0669534	0.322355	0.127701	1.10097	0.127701	0.517009	0.322355	-0.0669534	0.906317	-0.0669534	-0.0669534	0.127701	-0.0669534	0.322355	0.517009	-0.261607	0.127701	-0.0669534	-0.0669534	-0.456261	-0.650916	-0.261607	-0.650916	-0.0669534	-0.456261	-0.650916	-0.261607	-0.0669534	0.127701	0.711663	0.127701	0.322355	0.322355
EMR17008_20170718_PA10_03A	M	X	R	0.381537	0.194095	0.00665372	0.381537	-0.180788	0.00665372	0.194095	0.00665372	0.194095	0.75642	0.381537	1.69363	1.69363	2.06851	2.63084	2.06851	1.50619	2.25595	1.69363	1.69363	1.50619	1.69363	1.1313	1.50619	1.1313	1.1313	0.381537	0.194095	-0.368229	0.943861	1.50619	0.194095	0.194095	-0.180788	0.00665372	0.381537	1.1313	0.381537	1.1313	0.943861
EMR17008_20170718_PA10_05A	M		R	-0.446867	0.03687	0.278739	0.278739	0.03687	0.520607	0.520607	0.520607	0.278739	0.762476	0.278739	0.520607	0.278739	-0.204998	0.03687	0.520607	0.278739	-0.446867	-0.204998	0.03687	0.520607	0.278739	-0.446867	0.278739	0.03687	0.03687	0.03687	0.278739	0.03687	0.278739	-0.204998	0.03687	0.03687	0.278739	0.278739	0.03687	0.762476	1.24621	0.520607	1.24621
EMR17008_20170718_PA10_05B	M	X	R	0.960707	0.115335	0.326678	0.749364	0.326678	0.749364	0.749364	0.749364	-0.0960077	1.17205	0.538021	0.115335	0.749364	0.749364	0.326678	0.960707	0.749364	0.749364	0.749364	1.80608	3.07414	2.44011	1.38339	1.38339	0.115335	0.115335	0.538021	0.749364	-0.0960077	-0.518694	-0.307351	0.115335	0.326678	0.115335	-0.307351	0.538021	0.960707	0.115335	0.960707	1.38339
EMR17008_20170718_PA10_09A	M	X	R	1.38193	0.537543	-0.0253827	0.25608	-0.306846	1.66339	0.819006	1.38193	1.38193	1.66339	1.94486	1.66339	2.22632	1.38193	0.819006	0.25608	-0.0253827	0.25608	-0.0253827	-0.306846	-0.306846	0.537543	-0.306846	-0.0253827	-0.0253827	0.25608	-0.306846	0.25608	-0.306846	-0.0253827	1.10047	2.22632	2.22632	1.94486	0.25608	0.537543	0.25608	-0.306846	-0.306846	-0.0253827
EMR17008_20170718_PA10_09B	M	X	R	0.0115998	1.72372	1.72372	2.06614	0.354024	1.03887	2.06614	0.354024	1.3813	2.06614	0.0115998	0.354024	0.0115998	0.696448	0.696448	0.696448	2.40857	0.354024	0.696448	0.354024	0.0115998	0.696448	0.696448	0.354024	1.3813	0.354024	0.696448	0.0115998	-0.330824	0.354024	0.696448	0.354024	0.0115998	-0.330824	0.354024	-0.330824	0.354024	1.3813	0.354024	0.354024
EMR17008_20170718_PA10_11A	M		R	0.897627	0.108889	1.292	0.503258	0.503258	0.108889	0.503258	0.108889	-0.28548	0.108889	0.503258	0.108889	0.108889	-0.28548	-0.28548	-0.28548	-0.28548	-0.28548	-0.28548	-0.28548	-0.28548	0.108889	-0.28548	-0.28548	0.108889	0.503258	-0.28548	-0.28548	-0.28548	0.108889	0.503258	-0.28548	0.108889	0.108889	0.108889	0.108889	-0.28548	1.292	-0.28548	0.108889
EMR17008_20170718_PA10_11B	M			0.16222	0.16222	0.440219	-0.115779	1.55222	0.16222	0.440219	0.440219	-0.115779	-0.115779	0.718219	0.16222	0.996218	-0.393778	-0.393778	-0.115779	0.440219	-0.393778	-0.393778	-0.115779	0.16222	0.718219	-0.115779	0.718219	0.16222	-0.115779	-0.393778	-0.393778	0.16222	-0.115779	-0.393778	-0.393778	-0.393778	-0.115779	-0.115779	0.440219	-0.115779	-0.115779	0.16222	0.440219
EMR17008_20170718_PA10_11C	M	X	R	-0.147989	2.21221	-0.147989	0.189182	0.526353	0.189182	-0.147989	-0.147989	0.189182	0.189182	-0.147989	-0.147989	-0.147989	0.189182	-0.147989	0.189182	-0.147989	-0.147989	-0.147989	0.526353	-0.147989	-0.147989	-0.147989	0.189182	0.189182	0.189182	-0.147989	0.189182	-0.147989	-0.147989	-0.147989	-0.147989	-0.147989	-0.147989	0.189182	0.526353	-0.147989	-0.147989	0.526353	0.189182
EMR17008_20170718_PA10_17A	M		R	-0.435804	0.0207092	-0.207548	0.0207092	0.248966	0.933736	0.70548	0.248966	0.477223	0.933736	1.39025	1.16199	0.70548	0.248966	0.0207092	-0.435804	-0.435804	-0.435804	-0.435804	-0.435804	-0.207548	-0.435804	-0.207548	0.0207092	-0.435804	0.477223	0.477223	0.477223	0.248966	-0.435804	-0.435804	-0.435804	-0.435804	-0.435804	0.70548	0.70548	0.248966	0.70548	0.70548	0.248966
EMR17008_20170718_PA10_17B	M		R	0.919718	1.13457	-0.584263	0.275155	0.919718	-0.154554	1.56428	-0.369409	0.704864	0.490009	-0.154554	0.490009	0.275155	0.0603003	-0.154554	0.490009	0.0603003	-0.154554	0.275155	-0.154554	0.275155	0.275155	0.275155	-0.154554	-0.154554	0.704864	-0.584263	0.0603003	0.0603003	0.0603003	-0.584263	-0.154554	0.0603003	0.275155	0.704864	0.275155	-0.369409	0.490009	-0.369409	0.490009
EMR17008_20170718_PA10_19A	M	X	R	-0.201519	-0.0669467	0.202198	0.336771	-0.201519	1.41335	0.471344	0.471344	0.740489	0.202198	0.336771	-0.0669467	0.875061	0.605916	1.27878	0.202198	1.27878	0.875061	0.875061	1.6825	0.875061	0.336771	0.202198	0.471344	-0.0669467	-0.336092	-0.0669467	-0.0669467	-0.336092	0.202198	-0.605237	-0.0669467	-0.605237	-0.73981	-0.201519	-0.336092	-0.0669467	0.605916	0.202198	0.740489
EMR17008_20170718_PA10_19B	M	X	R	0.431998	0.222181	-0.197452	0.222181	-0.197452	0.431998	0.0123646	0.222181	0.851631	1.27126	1.06145	0.0123646	1.27126	0.222181	0.641815	0.641815	0.0123646	0.0123646	0.641815	-0.197452	0.641815	0.0123646	0.0123646	-0.617086	0.0123646	-0.407269	-0.407269	-0.407269	-0.407269	-0.407269	-0.407269	-0.407269	-0.407269	-0.197452	0.431998	0.431998	0.0123646	0.641815	0.851631	1.48108
EMR17008_20170718_PA10_21A	M	X	R	0.440981	-0.490188	0.440981	-0.303954	-0.303954	-0.117721	0.627214	0.813448	0.254747	1.37215	1.93085	1.18592	2.30332	0.813448	0.440981	0.627214	0.813448	1.55838	0.813448	1.55838	1.74462	1.18592	1.37215	1.18592	0.999682	0.627214	0.0685131	-0.676422	-0.117721	-0.303954	-0.676422	-0.490188	-0.676422	-0.490188	-0.676422	-0.303954	-0.676422	-0.490188	-0.490188	-0.303954
EMR17008_20170718_PA10_21B	M	X	R	0.0658669	-0.131476	0.460553	0.855238	0.26321	0.26321	0.460553	-0.131476	-0.131476	0.460553	0.460553	0.855238	0.657895	1.64461	2.23664	2.82867	0.855238	1.24992	1.64461	1.24992	1.05258	1.05258	0.26321	0.0658669	-0.328819	0.0658669	-0.328819	-0.526162	-0.328819	-0.526162	-0.526162	-0.328819	-0.723504	0.460553	1.05258	1.44727	1.24992	1.44727	1.84195	0.460553
EMR17008_20170718_PA10_21C	M		R	-0.255141	-0.255141	0.0978549	0.45085	0.274353	0.45085	0.45085	-0.255141	-0.431638	-0.255141	-0.608136	-0.431638	-0.255141	-0.255141	-0.255141	-0.431638	-0.784634	-0.608136	-0.431638	-0.431638	-0.784634	-0.431638	-0.784634	-0.431638	0.0978549	-0.255141	0.45085	0.627348	0.274353	0.45085	-0.0786428	-0.608136	-0.255141	-0.0786428	-0.431638	-0.784634	-0.784634	0.0978549	-0.431638	-0.0786428
EMR17008_20170718_PA10_21D	M		R	-0.00255114	-0.429669	-0.21611	-0.00255114	-0.429669	-0.21611	-0.429669	-0.00255114	-0.21611	0.851685	0.638126	-0.21611	0.424567	0.424567	-0.00255114	0.424567	-0.21611	0.211008	0.851685	0.424567	0.851685	-0.00255114	0.211008	0.424567	0.211008	-0.00255114	1.2788	-0.00255114	0.851685	0.424567	-0.00255114	0.638126	-0.00255114	-0.643228	0.638126	-0.429669	-0.21611	-0.643228	-0.00255114	-0.643228
EMR17008_20170718_PA10_21E	M		R	-0.333464	0.0238745	0.381213	0.0238745	0.0238745	-0.333464	0.0238745	-0.333464	-0.333464	-0.333464	-0.690803	-0.690803	-0.512134	-0.690803	-0.333464	-0.333464	0.202544	-0.154795	-0.154795	0.202544	-0.333464	-0.333464	-0.512134	-0.690803	-0.512134	-0.333464	0.0238745	-0.154795	0.202544	-0.333464	-0.690803	0.0238745	-0.690803	-0.512134	-0.512134	-0.154795	0.0238745	-0.512134	0.202544	0.0238745
EMR17008_20170718_PA10_23A	M	X	L	0.865827	0.865827	1.30324	1.59485	1.88646	0.428414	0.720022	-0.00899962	0.282609	-0.592217	-0.446413	-0.883826	-0.592217	-0.883826	-0.446413	-0.592217	-0.592217	-0.00899962	-0.300608	-0.300608	0.282609	1.01163	0.865827	1.30324	1.44904	1.15744	0.865827	-0.00899962	-0.154804	-0.00899962	0.282609	-0.00899962	-0.592217	-0.738022	-0.592217	-0.446413	-0.446413	-0.592217	-0.738022	-0.00899962
EMR17008_20170718_PA10_23B	M	X	R	0.0890297	0.459431	0.459431	0.459431	0.0890297	0.706365	0.953299	-0.281372	0.335964	0.706365	1.07677	-0.281372	0.335964	-0.157904	-0.77524	-0.404839	-0.404839	-0.157904	-0.0344374	-0.0344374	-0.528306	-0.651773	-0.157904	-0.77524	-0.281372	-0.281372	-0.0344374	-0.528306	-0.157904	-0.0344374	-0.651773	-0.898707	-0.651773	-0.528306	-0.651773	-0.157904	-0.404839	0.212497	-0.281372	0.459431
EMR17008_20170718_PA10_23C	M	X	R	0.451363	0.249697	0.653028	0.753861	0.854694	1.76219	2.06469	1.56052	1.35886	0.955527	1.15719	0.552196	0.451363	0.0480312	0.249697	-0.254467	-0.0528017	-0.0528017	0.148864	0.552196	1.05636	0.854694	0.653028	1.25803	0.753861	1.05636	1.15719	1.15719	0.249697	0.753861	0.0480312	-0.153635	0.148864	0.35053	0.753861	0.955527	1.05636	0.753861	0.653028	0.552196
EMR17008_20170718_PA10_23D	M	X	R	-0.126446	0.319658	0.170956	0.468359	0.319658	1.06316	0.468359	0.170956	-0.275148	-0.572551	0.022255	-0.572551	-0.423849	-0.275148	-0.423849	0.319658	0.022255	-0.423849	0.617061	1.21187	2.25278	0.170956	0.765762	1.36057	-0.721252	-0.275148	0.170956	0.617061	0.468359	0.022255	-0.423849	0.022255	-0.275148	-0.423849	-0.126446	-0.126446	0.468359	0.617061	1.06316	0.319658
EMR17008_20170718_PA10_29A	M	X	R	-0.213823	-0.0196205	-0.310924	-0.505126	0.0774806	-0.408025	-0.310924	-0.213823	0.465885	-0.116722	-0.0196205	-0.505126	0.0774806	0.0774806	-0.602227	-0.408025	0.0774806	-0.310924	-0.213823	-0.213823	-0.408025	0.174582	0.174582	0.0774806	-0.213823	-0.0196205	0.174582	-0.0196205	-0.602227	-0.505126	-0.602227	-0.0196205	-0.310924	-0.0196205	-0.408025	-0.505126	0.0774806	0.174582	0.0774806	-0.0196205
EMR17008_20170718_PA10_29B	M		R	0.641565	0.102503	0.372034	0.372034	-0.167028	0.102503	0.102503	-0.167028	-0.167028	0.102503	0.102503	-0.167028	-0.167028	-0.436558	-0.436558	-0.436558	-0.436558	-0.436558	-0.436558	0.102503	0.372034	-0.436558	-0.436558	-0.436558	-0.436558	-0.436558	-0.436558	-0.436558	-0.167028	-0.436558	-0.436558	-0.167028	0.372034	-0.436558	-0.167028	-0.436558	-0.167028	-0.167028	-0.436558	-0.436558
EMR17008_20170718_PA10_31A	M	X	R	-0.168991	-0.168991	-0.168991	-0.168991	0.486186	0.486186	-0.168991	-0.168991	-0.168991	-0.168991	-0.168991	-0.168991	-0.168991	-0.168991	-0.168991	-0.168991	-0.168991	0.486186	-0.168991	1.79654	1.79654	0.486186	-0.168991	-0.168991	-0.168991	-0.168991	-0.168991	-0.168991	-0.168991	-0.168991	-0.168991	-0.168991	-0.168991	0.486186	0.486186	-0.168991	0.486186	1.79654	0.486186	-0.168991
