# Supplementary material for: Sex-dependent noradrenergic modulation of premotor cortex during decision-making
Source: eLife. 2023 Aug 22;12:e85590. doi: 10.7554/eLife.85590 (PMC10471161; doi:10.7554/eLife.85590)
Supplement: Figure 5—source data 1. [file elife-85590-fig5-data1.xlsx]

## Sheet: RawData
	Fig 5B				Fig 5C	Beta 1			Fig 5D	Beta 2
	Sex	Beta 1	Beta 2		Sex	vGlut1+	Other		Sex	vGlut1+	vGAT+	Other
	Female	134	123		Female	121	13		Female	56	47	20
	Female	86	178		Female	86	0		Female	60	60	58
	Female	59	165		Female	59	0		Female	68	69	28
	Female	64	154		Female	64	0		Female	10	127	17
	Female	135	186		Female	126	9		Female	110	30	46
	Female	122	125		Female	122	0		Female	99	18	8
	Female	88	159		Female	88	0		Female	62	67	30
	Female	102	141		Female	102	0		Female	4	113	24
	Male	95	81		Male	93	2		Male	56	23	2
	Male	26	66		Male	26	0		Male	48	15	3
	Male	102	119		Male	87	15		Male	61	34	24
	Male	85	156		Male	77	8		Male	72	53	31
	Male	82	113		Male	78	4		Male	69	23	21
	Male	94	113		Male	85	9		Male	50	45	18
	Male	96	145		Male	76	20		Male	47	58	40
	Male	93	111		Male	80	13		Male	78	26	7

## Sheet: Statistics
	Fig 5B							Fig 5C							Fig 5D
	Two-way RM ANOVA							Two-way RM ANOVA							Two-way RM ANOVA
	Source of Variation	% of total variation	P value	P value summary	Significant?			Source of Variation	% of total variation	P value	P value summary	Significant?			Source of Variation	% of total variation	P value	P value summary	Significant?
	Receptor x Sex	3.295	0.1573	ns	No			Cell type x Sex	2.362	0.0241	*	Yes			Cell type x Sex	5.51	0.2566	ns	No
	Receptor	33.74	0.0003	***	Yes			Cell type	83.33	<0.0001	****	Yes			Cell type	27.08	0.0034	**	Yes
	Sex	14.73	0.0161	*	Yes			Sex	0.6995	0.2994	ns	No			Sex	5.419	0.0081	**	Yes
	Subject	27.57	0.2984	ns	No			Subject	8.432	0.1858	ns	No			Subject	7.998	0.9901	ns	No
	ANOVA table	SS	DF	MS	F (DFn, DFd)	P value		ANOVA table	SS	DF	MS	F (DFn, DFd)	P value		ANOVA table	SS	DF	MS	F (DFn, DFd)	P value
	Receptor x Sex	1378	1	1378	F (1, 14) = 2.232	P=0.1573		Cell type x Sex	1445	1	1445	F (1, 14) = 6.392	P=0.0241		Cell type x Sex	2265	2	1133	F (2, 28) = 1.429	P=0.2566
	Receptor	14112	1	14112	F (1, 14) = 22.86	P=0.0003		Cell type	50960	1	50960	F (1, 14) = 225.5	P<0.0001		Cell type	11130	2	5565	F (2, 28) = 7.020	P=0.0034
	Sex	6161	1	6161	F (1, 14) = 7.479	P=0.0161		Sex	427.8	1	427.8	F (1, 14) = 1.162	P=0.2994		Sex	2228	1	2228	F (1, 14) = 9.486	P=0.0081
	Subject	11532	14	823.7	F (14, 14) = 1.334	P=0.2984		Subject	5156	14	368.3	F (14, 14) = 1.630	P=0.1858		Subject	3288	14	234.8	F (14, 28) = 0.2962	P=0.9901
	Residual	8643	14	617.3				Residual	3164	14	226				Residual	22197	28	792.8
	Šídák's multiple comparisons test	Predicted (LS) mean diff.	95.00% CI of diff.	Below threshold?	Summary	Adjusted P Value		Šídák's multiple comparisons test	Predicted (LS) mean diff.	95.00% CI of diff.	Below threshold?	Summary	Adjusted P Value		Šídák's multiple comparisons test	Predicted (LS) mean diff.	95.00% CI of diff.	Below threshold?	Summary	Adjusted P Value
	Female - Male							Female - Male							Female - Male
	β1	14.63	-17.09 to 46.34	No	ns	0.489		vGlut1 +	20.75	0.3857 to 41.11	Yes	*	0.0453		vGlut1 +	-1.5	-32.13 to 29.13	No	ns	0.9991
	β2	40.88	9.163 to 72.59	Yes	*	0.01		Other	-6.125	-26.49 to 14.24	No	ns	0.7329		vGAT +	31.75	1.122 to 62.38	Yes	*	0.0401
															Other	10.63	-20.00 to 41.25	No	ns	0.7766
